# Supplementary material for: Chromatin Dynamics and Gene Expression Response to Heat Exposure in Field-Conditioned versus Laboratory-Cultured Nematostella vectensis
Source: MDPI journal article supplement (doi:10.3390/ijms22147454), 2021-07-12
Supplement: s1 [file ijms-1274082 supplementary resubmitted.xlsx]

## Sheet: Table S1
Table S1. Number of peaks detected per sample using MACS2.
Sample Name	# of peaks in rep 1	# of peaks in rep 2	# of peaks in rep 1
Pre-stress 18°C Lab	104756	133764	112986
Pre-stress 18°C Field	78973	68032	62041
Stress 37°C Lab	41212	76922	83081
Stress 37°C Field	55382	72263	115248
24h recovery 18°C Lab	86776	84199	87249
24h recovery 18°C Field	118525	89064	100770
48h recovery 18°C Lab	80117	100069	121582
48h recovery 18°C Field	78651	83962	73280

## Sheet: Table S2
Table S2: DEGs relative to pre-stress time-point
GeneID	UNIPROT_ID	stress	Lab stress	Field prestress	Lab prestress	Field re24	Lab re24	Field re48	Lab re48
NEMVEDRAFT_v1g100014	A7S0L9	-2.44483	0.258922	-0.0828708	1.13028	0.525076	-0.292621	0.266832	-2.4993
NEMVEDRAFT_v1g100135	A7S0J5	1.02946	0.0562728	0.469811	-0.62919	-0.35809	0.315025	-0.245101	1.06034
NEMVEDRAFT_v1g100176	A7S0V3	0.953589	0.5304	-0.183953	-0.790244	-0.563087	0.698107	-0.76281	0.701746
NEMVEDRAFT_v1g100372	A7S162	1.12432	-0.459701	0.893435	-0.729517	0.508729	0.125304	0.239229	1.50142
NEMVEDRAFT_v1g100386	A7S142	0.926766	-0.194662	0.729195	0.546365	0.569056	-0.0922841	0.455216	-0.943149
NEMVEDRAFT_v1g10066	A7SU62	-0.80037	0.448629	-0.643789	-0.340057	-0.362542	0.640045	-0.544475	-0.119283
NEMVEDRAFT_v1g100670	A7S1C8	-1.33216	-0.477665	-0.431432	0.827549	0.075643	-0.546107	-0.26421	-1.50393
NEMVEDRAFT_v1g100712	A7S1G8	0.959016	-1.02688	0.876719	-0.485211	0.474841	0.135324	0.680501	0.713727
NEMVEDRAFT_v1g100890	A7S1F9	1.98549	-1.83198	1.26325	0.405007	0.27865	-1.77657	0.280349	-0.706635
NEMVEDRAFT_v1g100925	A7S1D5	-0.71548	-0.304298	0.591571	0.640881	1.07973	-0.864442	0.506344	-0.287225
NEMVEDRAFT_v1g101013	A7S1L1	1.19878	-0.244543	0.680714	-0.835881	0.0213834	0.440023	0.0499143	1.51738
NEMVEDRAFT_v1g101023	A7S1N9	-1.29495	-0.68264	1.01522	1.49413	1.54273	-1.47464	1.24092	-2.01353
NEMVEDRAFT_v1g101093	A7S1T0	-3.29853	-1.57533	0.702543	2.00023	1.17605	-4.15577	1.30325	-3.08225
NEMVEDRAFT_v1g101105	A7S1P0	2.99398	0.393975	1.08375	0	-4.91593	0	-2.08858	0
NEMVEDRAFT_v1g101120	A7S1R5	1.20346	-1.5923	0.496323	0.494691	0.126716	-1.07882	0.330391	0.586172
NEMVEDRAFT_v1g10122	A7SU69	1.31222	-0.545424	0.349479	0.763555	-0.208897	-1.11786	-1.09596	-0.6969
NEMVEDRAFT_v1g101334	A7S1T5	-3.86652	-0.664689	1.99533	1.83351	2.34525	-3.28918	2.66638	-2.31611
NEMVEDRAFT_v1g101521	A7S2A7	-1.1312	0.231173	0.267237	0.2775	0.986178	-0.376656	0.121128	-0.840423
NEMVEDRAFT_v1g101713	A7S238	-2.05599	-0.636811	-0.235058	1.25976	0.0704303	-2.6375	0.336377	-1.31359
NEMVEDRAFT_v1g101762	A7S261	1.57056	-1.35957	1.40846	-0.936189	-0.585395	-0.703532	1.24242	1.95137
NEMVEDRAFT_v1g101766	A7S258	1.04241	-0.717193	0.844279	-0.0688162	0.309375	-0.853067	0.823955	0.43499
NEMVEDRAFT_v1g101864	A7S2D8	-1.33647	-0.415843	0.170991	0.647321	0.812778	-1.33334	0.0317934	-0.567813
NEMVEDRAFT_v1g101900	A7S2C5	-1.86634	0.787044	-0.762468	0.180745	0.0131401	0.323929	-0.797851	-1.28634
NEMVEDRAFT_v1g102076	A7S2P7	-2.71745	-2.09077	-0.094444	1.46963	0.736042	-1.98995	-0.0136519	-3.0463
NEMVEDRAFT_v1g102199	A7S2L1	-2.61794	-0.203898	1.2004	0.908317	1.88911	-0.372762	1.5317	-1.95923
NEMVEDRAFT_v1g102206	A7S2L6	-1.43249	0.262131	0.196558	0	-0.502085	0	1.22258	0
NEMVEDRAFT_v1g102518	A7S321	1.29026	-1.3737	0.440549	1.95732	0.475913	-3.84828	-1.78543	-0.613716
NEMVEDRAFT_v1g102533	A7S2Y1	-1.31339	0.507036	0.0587437	0.398085	-0.125099	-0.0795712	0.828668	-1.36868
NEMVEDRAFT_v1g102616	A7S357	1.6764	-0.679198	0.067838	-2.09045	-0.993572	1.05997	-1.36247	2.99953
NEMVEDRAFT_v1g10271	A7SNA1	-1.77856	0.10227	0.280898	0.0458709	0.519158	-0.149118	0.877871	-1.15983
NEMVEDRAFT_v1g102735	A7S2Z2	-2.15076	-0.295494	0.431842	-0.0722594	0.845011	-0.379458	0.855522	-1.29073
NEMVEDRAFT_v1g10320	A7SPM9	1.27551	-1.23936	1.06158	-0.247839	0.248861	-1.20146	0.632655	1.1701
NEMVEDRAFT_v1g103243	A7S3P4	1.29237	-0.446705	0.185052	-1.69043	-0.932007	1.26476	-0.684205	3.02007
NEMVEDRAFT_v1g103440	A7S3Q1	-1.54888	-1.10134	0.547548	0.836539	1.11899	-3.00576	0.550263	-0.888058
NEMVEDRAFT_v1g103533	A7S3X0	1.58754	-1.04125	0.327133	-0.274224	-0.879401	0.00861896	-0.278596	1.02157
NEMVEDRAFT_v1g103627	A7S3Z9	1.9009	-0.934763	0.843999	-1.83222	-0.723082	1.19879	0.376282	3.03427
NEMVEDRAFT_v1g103646	A7S3W8	-1.96936	-0.570229	0.418985	0.629695	1.46943	-1.7473	-0.109924	-1.10426
NEMVEDRAFT_v1g103714	A7S3Z1	0.617787	0.322591	0.701683	-0.428891	0.351568	1.25397	0.593809	-0.323105
NEMVEDRAFT_v1g103725	A7S3X3	1.95747	-0.694712	0.628047	-0.513977	-0.789424	1.82023	-0.037906	-1.15926
NEMVEDRAFT_v1g103779	A7S3U4	-1.23428	0.275392	-0.443953	-0.0966575	0.145433	0.619501	-0.474741	-0.00209125
NEMVEDRAFT_v1g103789	A7S3W9	1.0229	-0.841544	0.802629	0.0724033	0.49778	-0.448966	0.662832	0.606857
NEMVEDRAFT_v1g103908	A7S455	-1.92493	-0.325752	1.24189	0.825888	2.01807	-1.54941	1.16264	-1.10687
NEMVEDRAFT_v1g104154	A7S476	-2.024	-0.749078	0.753133	1.35261	1.52083	-1.15343	0.85211	-2.69186
NEMVEDRAFT_v1g104208	A7S4I5	-4.0487	0.169272	0.785203	1.56343	1.17214	-3.01834	1.48918	-2.52941
NEMVEDRAFT_v1g104383	A7S4I8	1.66285	-0.873042	1.31313	-0.877392	0.339253	-0.152951	0.714084	1.81701
NEMVEDRAFT_v1g104395	A7S4J0	-1.44882	-0.366074	-0.419081	0.285317	-0.192946	-0.433789	0.00895798	-0.771971
NEMVEDRAFT_v1g104439	A7S4K1	-1.82587	1.18214	-0.388628	-0.0386722	-1.81062	-0.957127	0.797117	-0.552531
NEMVEDRAFT_v1g104524	A7S4L0	-1.7226	0.157248	0.0202595	0.185394	0.506403	-0.511267	0.282617	-7.3938
NEMVEDRAFT_v1g104612	A7S4N7	1.46643	0.116196	0.527328	-1.54598	0.26639	2.17671	-1.30017	2.10247
NEMVEDRAFT_v1g104658	A7S4K3	1.51395	-0.340315	0.807738	-0.252261	-0.169662	-0.230348	0.288538	0.706057
NEMVEDRAFT_v1g104836	A7S4Z7	1.74734	-0.665443	1.74887	-0.732682	0.189849	0.0897401	0.539817	1.39227
NEMVEDRAFT_v1g105061	A7S518	-1.17631	1.29182	-0.122993	-0.688425	-0.266758	0.508651	0.482091	-0.358169
NEMVEDRAFT_v1g10511	A7SSG4	1.1716	-0.599899	-0.102022	-1.9225	-0.579653	2.01795	-1.38562	2.46059
NEMVEDRAFT_v1g105113	A7S529	-1.9813	0.0159975	0.0370763	0.591789	0.97332	-1.32352	-0.363969	-1.01529
NEMVEDRAFT_v1g105169	A7S5B7	1.62816	-1.50675	0.656253	-0.85417	-0.073966	-0.598769	-0.185337	2.06094
NEMVEDRAFT_v1g105271	A7S5B4	-2.20779	1.25253	2.13662	-0.126196	2.18554	0.219335	2.87284	-0.649409
NEMVEDRAFT_v1g105359	A7S5B2	-2.06143	1.1579	-1.23733	-0.474419	-1.23404	0.5255	-0.619894	-0.308336
NEMVEDRAFT_v1g105385	A7S5D2	0.722415	-0.713938	1.08147	0.260931	0.858761	-0.347554	1.03037	0.341894
NEMVEDRAFT_v1g105451	A7S5N2	0.903058	-0.0695021	0.689897	-0.756403	-0.0619318	0.19618	0.442959	1.18097
NEMVEDRAFT_v1g105460	A7S5M4	-3.56347	0.273171	2.38561	1.01427	2.54304	-1.48521	3.22214	-1.7761
NEMVEDRAFT_v1g105511	A7S5I8	0.631914	0.0571676	0.554006	0.377847	0.272334	-0.0774305	0.3747	-1.33026
NEMVEDRAFT_v1g105520	A7S5I4	0.66588	-0.0864429	0.328897	0.0658429	-0.253295	-0.599621	0.127517	0.0365587
NEMVEDRAFT_v1g105672	A7S5V0	-2.85027	1.54305	1.33811	-0.550916	2.53415	0.633923	0.581988	-0.136592
NEMVEDRAFT_v1g105700	A7S5R3	-0.793963	-0.525401	0.107259	0.834355	0.554872	-1.50736	0.173347	-1.14969
NEMVEDRAFT_v1g105739	A7S5P8	-0.623806	-0.525648	-0.268394	0.896475	-0.114785	-1.3847	-0.0636187	-2.34516
NEMVEDRAFT_v1g105746	A7S5V3	1.48996	-0.153529	3.06216	-0.861239	2.35921	0.577337	2.30392	1.38244
NEMVEDRAFT_v1g105753	A7S5Q9	2.08466	-2.836	0.780741	0.623667	0.138564	-2.50377	-0.931108	-0.411347
NEMVEDRAFT_v1g105779	A7S5Y0	-4.01956	-1.7785	2.03034	2.18287	2.24733	-4.37269	2.86898	-4.0061
NEMVEDRAFT_v1g105924	A7S604	-0.944497	-0.206935	-0.191939	0.483914	0.296877	-0.771538	-0.259446	-0.420162
NEMVEDRAFT_v1g106028	A7S690	-1.74282	-0.721043	0.335272	0.807976	0.635117	-0.918178	0.893614	-1.5567
NEMVEDRAFT_v1g106450	A7S6H4	-1.91385	-0.400916	1.64058	0.168033	2.67855	-0.188926	1.00674	-0.842113
NEMVEDRAFT_v1g106489	A7S6L7	-5.69579	-0.392315	0.262662	1.6179	0.99874	-2.8332	0.543755	-3.23883
NEMVEDRAFT_v1g106520	A7S6N1	-1.82702	0.153896	-0.438224	-1.22435	-0.155894	0.474967	-0.000896296	-1.25603
NEMVEDRAFT_v1g106556	A7S6L9	-0.95127	-0.00173391	-0.277672	0.893468	-0.159603	-1.24097	0.0727799	-1.4323
NEMVEDRAFT_v1g106562	A7S6M3	-1.92189	-0.676466	-0.349036	1.18535	0.506409	-0.381131	-0.503713	-2.5421
NEMVEDRAFT_v1g106775	A7S6P1	-1.12564	1.25194	-0.268542	-1.82023	-0.191724	1.44183	0.0100218	1.69293
NEMVEDRAFT_v1g107027	A7S6X5	-3.42253	-2.13423	3.92424	2.79523	3.28424	-4.40865	5.11466	-3.53781
NEMVEDRAFT_v1g107058	A7S766	0.902392	0.505595	0.263215	-0.84288	-0.750342	0.828441	-0.0325107	0.943868
NEMVEDRAFT_v1g107088	A7S765	1.02822	0.505861	0.00835763	-0.489108	-0.684608	0.880804	-0.681504	0.481381
NEMVEDRAFT_v1g107214	A7S726	0.814455	0.03902	1.00968	0	0.610634	0	0.818868	0
NEMVEDRAFT_v1g107252	A7S784	-1.0133	0.488862	0.611473	0	1.15616	0	0.610117	0
NEMVEDRAFT_v1g107253	A7S733	1.04435	0.0186034	1.38642	0	1.02194	0	0.87382	0
NEMVEDRAFT_v1g107265	A7S773	-2.90208	0.325725	1.83896	0.998362	2.30756	-2.45655	2.38388	-1.89429
NEMVEDRAFT_v1g107308	A7S7E6	0.983622	0.0944042	0.901364	-0.527787	0.374919	0.262071	0.357185	0.634793
NEMVEDRAFT_v1g107325	A7S7B5	2.44114	-0.793871	1.0359	-1.46364	-1.42599	0.719258	-2.54324	2.47899
NEMVEDRAFT_v1g107376	A7S7B7	2.72525	-0.225616	2.58635	-1.22662	-0.834473	0.190747	-1.03417	1.91354
NEMVEDRAFT_v1g107554	A7S7F0	-3.82108	0.928512	1.61651	0.497764	-0.0295405	-0.697751	3.00976	-1.72923
NEMVEDRAFT_v1g107555	A7S7B6	1.92727	-0.384811	0.86432	-1.09444	-1.79877	0.485667	-1.551	2.06589
NEMVEDRAFT_v1g107567	A7S7B2	2.26851	-0.434802	0.640984	-1.02184	-0.691029	1.25026	-2.15827	0.209065
NEMVEDRAFT_v1g107629	A7S7K3	1.04301	0.153651	0.181141	-0.636373	-0.132363	0.235678	-1.0963	1.1021
NEMVEDRAFT_v1g107690	A7S7J9	-1.77816	-0.568704	0.0109833	0.213794	-0.287967	-0.373381	0.894109	-1.88236
NEMVEDRAFT_v1g107726	A7S7H2	-1.31295	-0.247478	-0.889576	0.396821	-0.70529	-0.495058	-0.494549	-0.509703
NEMVEDRAFT_v1g107861	A7S7S6	-3.29212	0.704879	-0.558086	-0.510517	-0.559246	1.04894	0.264199	-0.541158
NEMVEDRAFT_v1g107875	A7S7U4	-2.63182	1.27829	0.0327982	-0.66346	-0.678415	0.589768	1.17011	0.538479
NEMVEDRAFT_v1g107876	A7S7S2	1.17274	-0.408937	1.21029	-1.13528	0.147413	0.571608	0.760175	1.70248
NEMVEDRAFT_v1g107980	A7S7T8	-1.31431	-0.264867	-0.764835	0.398399	-0.470994	-0.69693	-0.397406	-0.943484
NEMVEDRAFT_v1g107994	A7S7Q2	1.3408	-0.203435	1.01104	0.418427	0.495791	0.138869	0.67224	-0.898705
NEMVEDRAFT_v1g108065	A7S7U6	-1.5463	-0.0271259	-0.0815318	0.884649	0.769859	-0.515466	-0.310088	-1.5952
NEMVEDRAFT_v1g108175	A7S7Y2	-3.28313	-0.669243	-3.68697	-1.33948	-3.05847	3.25026	-3.63507	-1.52552
NEMVEDRAFT_v1g108202	A7S7V5	-4.56548	-2.69684	2.60446	3.23898	2.05728	-2.49797	3.79073	-4.37742
NEMVEDRAFT_v1g108241	A7S7V4	-4.33731	-2.20184	2.78948	2.80942	2.18044	-1.67914	3.99305	-4.10176
NEMVEDRAFT_v1g108573	v1g108573	1.02397	-0.858955	0.728002	0.101306	0.600485	-0.0577402	-0.0611537	-0.0340097
NEMVEDRAFT_v1g108621	A7S8D4	-1.95931	0.00805556	-0.937723	-1.4122	-0.516541	1.26689	-0.810905	-0.5185
NEMVEDRAFT_v1g108724	A7S8F6	-1.37872	-0.0305066	-0.677266	0	-0.308247	0	-0.347869	0
NEMVEDRAFT_v1g108729	A7S8M8	-1.44045	0.758214	-0.731495	-0.750744	-0.438288	-0.258501	-0.503692	-0.639208
NEMVEDRAFT_v1g108749	A7S8J2	-6.14266	0.140214	0.404466	-6.35039	0.466678	6.06722	1.33984	7.2666
NEMVEDRAFT_v1g10881	A7T0Y3	-0.970918	-0.582912	-0.299595	0.815942	-0.00251288	-0.756633	-0.014553	-1.34946
NEMVEDRAFT_v1g108822	A7S8M3	-3.81571	0.0478259	0.40416	0.0651396	1.31714	0.797553	0.449932	-0.500471
NEMVEDRAFT_v1g108828	A7S8L6	-0.706803	0.0269761	0.316007	0	0.490787	0	0.673454	0
NEMVEDRAFT_v1g108942	A7S8P7	-4.72951	-0.921213	0.487847	1.84511	1.50252	-3.00726	0.402239	-3.12445
NEMVEDRAFT_v1g108962	A7S8P1	0.739367	-0.324038	0.924414	-0.613242	0.868828	-0.20694	0.412844	1.10064
NEMVEDRAFT_v1g109102	A7S8P8	-1.05153	-0.440495	0.689013	1.38301	1.24997	-0.984268	0.779519	-1.5455
NEMVEDRAFT_v1g109213	A7S8Y4	-2.22362	0.0399226	0.0525579	2.19678	0.230286	-2.36031	0.694073	-2.68632
NEMVEDRAFT_v1g109239	A7S8Y5	-2.48191	-0.786648	0.920618	2.95764	1.28038	-3.38205	1.54065	-3.69632
NEMVEDRAFT_v1g109363	A7S8Z1	-2.37429	2.13445	-0.271219	-1.31931	-0.328452	1.21368	0.526302	0.502706
NEMVEDRAFT_v1g109423	A7S8W2	-4.94292	1.33063	2.5856	1.14704	2.63	-1.88866	3.53171	-2.66854
NEMVEDRAFT_v1g109498	A7S945	1.10589	-0.555305	-0.355752	0.43057	-0.737895	-0.149731	-1.1558	0.377749
NEMVEDRAFT_v1g109636	A7S933	-1.27174	-0.101612	0.558928	0.70793	1.04296	-0.544087	0.858354	-1.27389
NEMVEDRAFT_v1g109826	A7S9G1	1.03467	-0.0834693	0.746977	-0.336867	0.674066	-0.321942	-0.0561978	0.658284
NEMVEDRAFT_v1g109942	A7S9C9	0.803039	-0.613913	-0.497864	0.83884	-1.33661	-1.28812	-0.662519	-0.858318
NEMVEDRAFT_v1g110002	A7S9K1	1.18405	-0.474799	0.0593169	0	-0.717048	0	-0.751284	0
NEMVEDRAFT_v1g110048	A7S9J8	-3.50505	-0.225026	-0.00948072	0.323494	0.753482	-0.30566	0.217666	-1.11709
NEMVEDRAFT_v1g110116	A7S9L1	1.39028	-0.616201	1.014	-1.35398	0.145166	0.566973	-0.130019	2.46075
NEMVEDRAFT_v1g110132	A7S9J9	-2.00467	-0.770854	-0.223717	1.06244	0.174954	-1.33245	0.269168	-2.86572
NEMVEDRAFT_v1g110181	A7S9K7	-3.80807	1.73186	2.81912	-0.197682	3.10219	-0.77993	3.51443	-0.0478856
NEMVEDRAFT_v1g110347	A7S9Y1	1.61858	-0.597522	-0.451644	-0.340764	-1.7026	1.19385	-1.27422	0.609805
NEMVEDRAFT_v1g11039	A7SNN6	-2.23511	-0.930309	-1.30023	0.711667	-1.16387	-0.611305	-0.692194	-2.61109
NEMVEDRAFT_v1g110667	A7SA38	1.50425	-0.161946	0.295352	-1.50832	-0.567432	0.867107	-1.35798	2.41315
NEMVEDRAFT_v1g110797	A7SAA4	1.03778	0.0406698	0.0933769	-0.571234	-0.688153	0.709296	-0.327552	1.12704
NEMVEDRAFT_v1g110912	A7SAF7	0.679173	-0.406819	0.316524	0.654047	-0.142008	-0.726857	0.0765009	-1.06542
NEMVEDRAFT_v1g11092	A7SBG4	-1.31077	-0.878254	0.0494564	1.53245	0.795591	-1.87403	-0.119221	-2.1113
NEMVEDRAFT_v1g110929	A7SAF0	0.619667	0.116757	0.4918	0	0.373556	0	0.211925	0
NEMVEDRAFT_v1g110962	A7SAG6	-0.73469	0.0948423	-0.068154	0.103585	-0.42429	-0.27513	0.56822	-1.96613
NEMVEDRAFT_v1g110987	A7SAG8	1.37167	-0.130967	1.18779	-0.701854	0.392675	0.0426295	-0.00408555	1.45053
NEMVEDRAFT_v1g110991	A7SAH0	0.736257	-0.804533	0.701419	-0.0058357	0.606054	-0.429126	0.278511	0.347263
NEMVEDRAFT_v1g111000	A7SAJ0	-1.90035	0.893541	-1.09991	-1.45144	-0.303991	1.43319	-1.40819	0.797643
NEMVEDRAFT_v1g111045	A7SAG7	1.5137	-0.261625	1.06055	-0.630429	-0.48014	-0.265529	-0.232394	1.53002
NEMVEDRAFT_v1g111097	A7SAP6	-1.22679	-0.304447	-0.250141	0.86435	0.217341	-0.792321	-0.0274051	-1.05554
NEMVEDRAFT_v1g11117	A7SPR0	1.16262	-0.590781	0.173915	0	-1.16505	0	0.246163	0
NEMVEDRAFT_v1g111422	A7SAR3	0.764088	0.174762	0.444711	-0.666573	0.0136796	0.585023	0.0549555	0.801748
NEMVEDRAFT_v1g11150	A7SSB9	-1.68527	0.400011	0.0259094	0	-0.517632	0	1.0401	0
NEMVEDRAFT_v1g11161	A7SDJ9	0.894092	0.202621	0.581686	-0.507759	-0.422862	0.598926	0.327912	0.816582
NEMVEDRAFT_v1g111825	A7SB83	-3.15458	-0.355154	-0.171695	1.81467	0.132169	-3.74559	0.266898	-1.95906
NEMVEDRAFT_v1g111883	A7SB86	-3.84674	-0.94099	1.33871	1.80691	1.11437	-4.40741	2.36963	-3.07932
NEMVEDRAFT_v1g112072	A7SBB1	-1.63528	0.28211	-0.0117956	0.95944	0.73853	-1.11523	-0.122112	-1.55021
NEMVEDRAFT_v1g112243	A7SBJ2	-1.3894	0.656834	-0.0821193	0.371453	-0.211387	0.207211	0.600075	-1.09666
NEMVEDRAFT_v1g112267	A7SBH3	0.785336	-0.292603	0.601813	0.0792103	0.0851771	-0.916847	0.493282	0.548087
NEMVEDRAFT_v1g112390	A7SBN4	1.88731	-1.14114	0.951903	-1.02045	-1.02663	-0.394339	0.21422	2.17349
NEMVEDRAFT_v1g112440	A7SBL1	-1.93807	-0.992986	0.531356	1.97817	1.08454	-2.68804	0.834383	-2.3514
NEMVEDRAFT_v1g112560	A7SBQ8	1.49669	-0.92817	0.339374	1.53933	-0.104633	-1.27174	-0.400558	-1.88378
NEMVEDRAFT_v1g112739	A7SBW8	-1.6216	-0.00425021	-0.732386	0.701839	-0.402146	-0.69226	-0.315635	-1.76388
NEMVEDRAFT_v1g112753	A7SBY5	-6.03891	-0.611808	-1.03224	1.75537	-0.444845	-1.74848	-0.572404	-3.37648
NEMVEDRAFT_v1g113239	A7SCE8	-3.08406	-1.54949	1.02183	3.45286	1.51844	-3.8167	1.52251	-4.39727
NEMVEDRAFT_v1g113255	A7SCI4	-0.714304	-0.2092	-0.0907146	0.600891	0.362386	-0.636723	-0.163752	-0.791582
NEMVEDRAFT_v1g113260	A7SCI7	6.4521	-8.54769	3.26481	-1.90791	-0.303822	-5.59732	-4.75271	4.44298
NEMVEDRAFT_v1g113343	A7SCJ3	0.816524	-0.183527	1.14221	-0.671046	0.82148	0.00345837	0.834546	1.26668
NEMVEDRAFT_v1g113379	A7SCG9	-2.98182	-0.106817	0.90666	-1.63132	1.03495	2.13595	1.63783	-0.0540187
NEMVEDRAFT_v1g113433	A7SCN0	0.795914	0.148602	0.312624	0	-0.847516	0	0.499537	0
NEMVEDRAFT_v1g113453	A7SCM0	2.3022	-0.691973	1.555	-1.90934	-0.906656	1.08284	-0.434968	1.73562
NEMVEDRAFT_v1g113475	A7SCK4	-1.38828	0.0107254	0.0344872	0	0.486769	0	0.27881	0
NEMVEDRAFT_v1g113596	A7SCT9	-2.93788	-0.872639	-0.0916821	1.61234	0.1037	-2.49677	0.539838	-2.10398
NEMVEDRAFT_v1g113623	A7SCT4	-1.58985	-0.628458	-0.495106	1.71731	0.165736	-1.63404	-0.421988	-2.61377
NEMVEDRAFT_v1g113641	A7SCR9	-1.87558	0.400614	-0.43096	0.723631	-0.0975208	-0.378025	0.0438027	-1.03514
NEMVEDRAFT_v1g113741	A7SCY3	-1.76677	0.0296823	1.26401	0.601393	1.98657	-1.4556	1.36376	-0.442714
NEMVEDRAFT_v1g113783	A7SCZ8	0.659288	0.20181	0.517573	-1.27065	-0.0553981	1.21305	0.452498	1.66954
NEMVEDRAFT_v1g113802	A7SCX7	1.38658	-0.69804	1.04467	0.151293	0.224641	-0.955589	0.459714	0.223081
NEMVEDRAFT_v1g113902	A7SD29	-1.80036	-0.427084	-0.60324	-0.580298	-0.993364	-0.172324	0.0757264	-1.1486
NEMVEDRAFT_v1g113931	A7SD34	-1.74641	-0.340216	-0.122814	0.598304	0.441595	-1.08984	-0.030632	-2.02423
NEMVEDRAFT_v1g114	A7SWE7	-0.605905	0.407434	0	0	0	0	0	0
NEMVEDRAFT_v1g114087	A7SD96	-2.64769	0.7349	-1.29032	0.504672	-0.913715	-0.142752	-0.731848	-0.652609
NEMVEDRAFT_v1g114199	A7SDK2	-3.43139	0.141204	0.938339	-0.975586	1.80399	1.42813	1.01346	-2.69435
NEMVEDRAFT_v1g114223	A7SDI6	-1.27232	-0.0478249	-0.259939	0.459605	0.193183	-0.112994	-0.0301203	-0.945666
NEMVEDRAFT_v1g114245	v1g114245	-7.53626	6.01761	-0.248974	-4.88538	-3.28416	1.71195	1.27144	2.89129
NEMVEDRAFT_v1g114506	A7SDT0	-1.98783	-0.474751	0.687279	1.29084	0.670452	-1.59703	1.54095	-2.13909
NEMVEDRAFT_v1g114558	A7SDS8	-2.16245	-0.655261	-0.217004	-0.512227	0.878374	-1.08031	-0.843914	-1.84217
NEMVEDRAFT_v1g114561	A7SDU6	-1.34394	-0.764588	-0.351399	1.32782	0.0830472	-1.41419	-0.0861622	-2.91235
NEMVEDRAFT_v1g114706	A7SDY8	-1.15316	0.594997	-0.00417733	0	0.162819	0	0.438438	0
NEMVEDRAFT_v1g115110	A7SEC0	-1.1833	0.645845	-0.248275	-0.172735	-0.0321379	0.226918	0.145714	0.0466644
NEMVEDRAFT_v1g115127	A7SED8	-5.12426	-1.79779	-0.753462	0.449883	0.49271	-1.95923	-1.58175	0.805391
NEMVEDRAFT_v1g115245	A7SEG2	-1.35033	0.164639	0.153056	-0.716561	0.0586099	1.45332	0.795193	-1.27422
NEMVEDRAFT_v1g115269	A7SED7	-6.73948	-7.25234	-0.498008	0.0652084	0.84388	-0.627452	-1.65264	1.54462
NEMVEDRAFT_v1g115283	A7SEG4	-0.644074	0.854443	-0.39793	-1.00896	-0.198589	1.32257	-0.352166	1.29032
NEMVEDRAFT_v1g115718	A7SEW7	1.80994	-0.369312	0.22426	-0.708351	-0.143502	1.32157	-3.00625	1.13609
NEMVEDRAFT_v1g115856	A7SEY2	0.810692	-0.857007	0.827696	0.792408	0.301762	-1.71644	0.743592	-0.254418
NEMVEDRAFT_v1g115870	A7SEZ4	1.23692	-0.521675	0.485274	-0.0449879	-0.20723	-0.0216647	0.216491	0.582147
NEMVEDRAFT_v1g115981	A7SF34	-1.48154	0.122496	0.45739	0.654185	1.1775	-0.40895	0.448708	-0.883968
NEMVEDRAFT_v1g116044	A7SF28	-3.34781	1.09015	0.138301	-1.16228	-0.443716	0.70242	1.27491	-0.374516
NEMVEDRAFT_v1g116118	A7SF60	0.65495	0.227898	0.515838	0	-0.0468325	0	0.599988	0
NEMVEDRAFT_v1g116171	A7SF82	-1.47596	0.0290655	-0.774799	0.664189	-0.201354	-1.05789	-0.797682	-1.93205
NEMVEDRAFT_v1g116184	A7SF81	-1.67724	-0.13108	-0.545846	0.485185	-1.01724	-0.230162	0.361479	-1.85129
NEMVEDRAFT_v1g116228	A7SF96	0.759538	0.177863	-0.144457	-0.527148	-0.181573	0.899976	-0.906424	0.692678
NEMVEDRAFT_v1g116293	A7SFA9	1.65592	0.202226	0.613936	-1.26615	-2.23002	1.17336	-0.227988	1.38761
NEMVEDRAFT_v1g116296	A7SFD5	-1.88596	-0.287933	0.171282	0.838801	0.685456	-0.810381	0.534494	-0.875502
NEMVEDRAFT_v1g116334	A7SFA4	1.67292	-0.249269	1.28772	0	0.343173	0	0.734211	0
NEMVEDRAFT_v1g116375	A7SFC8	-6.05728	-0.932659	-0.987948	0.612665	-0.61432	-0.0349345	-0.413466	-0.899181
NEMVEDRAFT_v1g116548	A7SFJ9	1.70242	-0.0945526	1.30592	-1.29483	-0.833802	0.592652	0.903701	1.69466
NEMVEDRAFT_v1g116678	A7SFS6	1.44577	-0.119479	-0.271791	-0.939897	-1.20311	1.19896	-1.7543	0.511041
NEMVEDRAFT_v1g116696	A7SFS8	-0.960096	0.128983	-0.556393	0	-0.129781	0	-0.50373	0
NEMVEDRAFT_v1g116697	A7SFQ0	-1.07876	0.649868	0.914076	0	1.50671	0	1.00745	0
NEMVEDRAFT_v1g116699	A7SFQ4	-1.59991	0.0826129	-0.311424	0.507151	0.659945	-1.1487	-0.965228	-0.575619
NEMVEDRAFT_v1g116716	A7SFX0	-1.63841	-0.686748	-1.34486	1.08169	-1.50924	-1.12581	-0.606511	-1.15685
NEMVEDRAFT_v1g116955	A7SG24	-1.98467	0.31567	-0.406601	1.16007	0.690626	-0.931231	-1.29226	-1.82632
NEMVEDRAFT_v1g116976	A7SG13	-3.17807	-0.380929	1.85284	-1.23893	1.2281	1.61789	3.01826	-0.411601
NEMVEDRAFT_v1g117150	A7SG77	-3.68192	0.273919	0.514417	1.11901	-0.207741	-2.02861	1.69372	-0.976018
NEMVEDRAFT_v1g117166	A7SG64	-0.684889	0.195099	-0.167411	-0.462117	0.119349	0.549695	-0.0705129	-1.00242
NEMVEDRAFT_v1g117182	A7SG79	-1.98026	0.14717	-0.595299	0.254331	-0.469062	-0.0532734	0.0681996	-1.27708
NEMVEDRAFT_v1g117252	A7SGE9	-1.79982	0.640995	-0.267947	0	0.250004	0	-0.0809792	0
NEMVEDRAFT_v1g11737	A7SKX5	-7.17535	-5.25498	2.69936	-5.0298	4.21983	5.8638	-0.503599	-3.32111
NEMVEDRAFT_v1g117533	A7SGJ2	0.883891	-0.0721752	0.790394	-1.17569	0.147019	0.876147	0.516037	1.82963
NEMVEDRAFT_v1g117537	A7SGM1	-1.69639	-0.995661	-0.293812	0.934148	-0.71509	-1.56122	0.638144	-2.76646
NEMVEDRAFT_v1g117565	A7SGK0	-1.45087	-1.33278	0.0195203	1.12361	0.247046	-1.54509	0.558681	-1.25117
NEMVEDRAFT_v1g117570	A7SGK1	-5.31035	0.183507	-0.208387	-1.08561	0.519325	0.128268	0.0439784	0.57062
NEMVEDRAFT_v1g11764	A7SX40	0.717043	-0.0701523	0.607204	-0.209751	0.151115	-0.146876	0.442782	0.687176
NEMVEDRAFT_v1g117697	A7SGN5	-1.00685	0.227418	0.292227	-0.224391	1.14708	0.243051	-0.211439	0.609763
NEMVEDRAFT_v1g117903	A7SGS8	-1.46882	0.934157	-0.157378	-0.0134926	0.527334	0.755617	-0.225725	-0.804145
NEMVEDRAFT_v1g118015	A7SGY8	1.36877	0.0865889	0.224574	-1.02063	-0.303932	-0.0934765	-1.29217	1.30609
NEMVEDRAFT_v1g118020	A7SH10	1.79132	-0.851056	1.36214	0.475592	0.433071	-1.02781	0.233385	0.721494
NEMVEDRAFT_v1g118058	A7SGZ0	-1.73886	-0.729114	0.518959	0.246271	-0.157967	0.0364177	1.57322	-2.06226
NEMVEDRAFT_v1g118077	A7SH39	2.48591	-2.48517	1.22124	-1.69018	-0.303891	0.185415	-0.262493	2.00645
NEMVEDRAFT_v1g118122	A7SH30	-1.33463	0.925702	-0.173671	0.0355944	0.212841	0.449025	0.0438041	-0.473509
NEMVEDRAFT_v1g118178	A7SH79	1.77786	-0.632066	1.32621	-1.81296	0.0950231	0.63466	0.207514	2.67636
NEMVEDRAFT_v1g118240	A7SH94	2.26783	-0.857926	1.30207	-0.54726	-1.42304	-0.0210904	-0.119688	1.36356
NEMVEDRAFT_v1g118356	A7SHF7	-3.38062	1.69995	-1.46561	-3.81599	-1.60662	3.78647	-0.85517	1.5198
NEMVEDRAFT_v1g118469	A7SHE2	-1.89536	0.355409	0.880964	-1.92081	1.33657	0.194701	1.13682	2.35067
NEMVEDRAFT_v1g118527	A7SHH0	-2.36948	-0.555201	-0.221257	0.458181	0.312075	-0.621684	0.177076	-3.50873
NEMVEDRAFT_v1g118882	A7SHU6	-1.86994	0.575864	-0.534819	0	-0.469033	0	-0.0984084	0
NEMVEDRAFT_v1g119283	A7SI60	1.8453	-0.655695	1.33633	-2.74057	0.447043	0.507555	-0.30664	4.01387
NEMVEDRAFT_v1g119370	A7SIB2	-2.28316	-1.66034	0.148959	1.39712	0.960052	-1.15374	0.228721	-3.05609
NEMVEDRAFT_v1g119405	A7SIB0	1.38544	-0.191148	1.42545	-0.894379	1.17618	-0.305027	0.106458	1.03067
NEMVEDRAFT_v1g119418	A7SIA8	2.0327	-3.00536	1.70274	0.502699	0.797754	-3.61472	-1.00216	0.147007
NEMVEDRAFT_v1g119695	v1g119695	3.26329	0.0383985	0	0	0	0	0	0
NEMVEDRAFT_v1g119733	A7SIN3	-1.00289	0.184641	-0.297316	0.692722	-0.229332	-1.22161	0.152863	-0.589609
NEMVEDRAFT_v1g119762	A7SIN2	-1.36598	0.106281	-0.425351	0.470679	-0.862714	0.0388475	0.440818	-0.914182
NEMVEDRAFT_v1g119894	A7SIS3	1.44064	-0.326477	0.566083	0	-0.117562	0	-0.0762763	0
NEMVEDRAFT_v1g119917	A7SIR2	0.725592	-0.171637	0.688638	-0.0317405	0.413513	-0.212663	0.576353	0.739191
NEMVEDRAFT_v1g119951	A7SIT9	-2.68006	0.098043	-1.27891	0.326272	-0.728821	-0.435371	-0.904668	-2.70976
NEMVEDRAFT_v1g119959	A7SIV4	-1.11797	0.386968	0.684373	0	1.18812	0	0.789268	0
NEMVEDRAFT_v1g120073	A7SIY1	0.917202	0.0116171	0.571849	-1.39139	-0.0983566	0.845626	0.208482	2.07683
NEMVEDRAFT_v1g120119	A7SJ13	-4.31447	0.176104	2.14721	1.6888	2.77779	-2.33914	2.64016	-3.0734
NEMVEDRAFT_v1g120147	A7SJ35	-1.42021	0.293714	0.130875	-0.867796	0.390883	1.36204	0.511795	-1.65497
NEMVEDRAFT_v1g120426	A7SJD2	-1.56646	0.469926	0.0766971	0.446864	0.152435	0.252973	0.670015	-3.697
NEMVEDRAFT_v1g12051	A7SXP0	-2.76302	0.695474	-0.106875	-0.683226	-0.150355	0.390314	0.741698	-0.951494
NEMVEDRAFT_v1g120633	A7SJJ1	-1.06368	-0.00756289	0.237048	0	0.838369	0	0.282393	0
NEMVEDRAFT_v1g120739	A7SJP9	-0.903211	-0.174744	-0.0256138	0.408122	0.291989	-0.0756599	0.252055	-0.995116
NEMVEDRAFT_v1g120764	A7SJQ4	2.10395	-5.46936	3.57628	0.494921	2.5035	-0.741511	3.04079	0.208087
NEMVEDRAFT_v1g120766	A7SJM2	1.25769	-0.806224	0.597613	0.621053	0.270297	-0.195601	0.308272	-1.24348
NEMVEDRAFT_v1g120822	A7SJT4	-1.72158	-0.310436	-0.391075	0.795783	0.440633	-0.948124	-0.644098	-1.04324
NEMVEDRAFT_v1g120890	A7SJW2	1.41008	-0.943567	1.76954	-0.807786	0.944718	-0.665607	1.06886	1.76615
NEMVEDRAFT_v1g120928	A7SJX0	-2.02376	-0.132739	2.51602	1.51175	3.15558	-3.21	2.75766	-1.953
NEMVEDRAFT_v1g120998	A7SJW5	1.39762	-0.243888	-0.0729022	-1.50843	-0.349884	0.873507	-2.22789	1.82667
NEMVEDRAFT_v1g121040	A7SJZ8	-2.54592	-0.952112	0.908385	0.851529	1.84128	-1.15231	0.794669	-1.352
NEMVEDRAFT_v1g121194	A7SK29	-1.49354	0.347147	0.317424	0.338947	1.06668	0.140836	0.270347	-1.10336
NEMVEDRAFT_v1g121204	A7SK34	2.22147	0.339668	1.26149	-1.95518	0.25796	2.68776	-2.57408	-0.142964
NEMVEDRAFT_v1g121435	A7SKA8	-2.86944	0.00371164	1.64488	1.74486	2.58189	-1.64678	1.58827	-2.51211
NEMVEDRAFT_v1g121461	A7SK87	-1.13115	-0.256346	-0.250337	0.734871	0.243034	-0.589516	-0.0719487	-0.875095
NEMVEDRAFT_v1g121512	A7SKF0	-1.12228	-0.079315	-0.218625	0.475933	0.0585805	-0.623417	0.192214	-1.72079
NEMVEDRAFT_v1g12162	A7SXI5	-2.23451	0.245621	-0.7818	0.437806	-0.369568	-1.40266	-0.440952	-1.09143
NEMVEDRAFT_v1g121685	A7SKI4	-1.6488	-0.0224457	-0.50194	0.23082	-0.303993	0.0323182	0.0309507	-2.72406
NEMVEDRAFT_v1g121705	A7SKK1	0.910648	-0.527841	0.916034	-0.388973	0.535296	-0.00817659	0.693247	0.792802
NEMVEDRAFT_v1g121715	A7SKJ3	-1.49715	-0.781716	-0.384958	1.01357	-0.0954853	-0.9256	0.135226	-2.24002
NEMVEDRAFT_v1g121734	A7SKK0	0.713946	-0.209577	0.340572	-0.908082	-0.18161	0.564123	0.248264	1.1711
NEMVEDRAFT_v1g121857	A7SKN3	1.4367	-0.495433	1.28386	0	1.2089	0	-0.306641	0
NEMVEDRAFT_v1g121965	A7SKS6	-0.888437	-0.0594465	0.468331	0	0.983808	0	0.502801	0
NEMVEDRAFT_v1g122013	A7SKT8	-1.45669	-0.543102	0.318222	0.690834	1.09235	-0.747387	0.17231	-2.65692
NEMVEDRAFT_v1g122027	A7SKR2	-6.94339	-2.98927	2.51016	-4.15499	3.97435	4.81505	0.344432	-0.45252
NEMVEDRAFT_v1g122070	A7SKX2	1.09515	-0.721119	1.21094	0.620023	1.03529	-0.753963	1.00285	-0.19108
NEMVEDRAFT_v1g122085	A7SKY9	-7.72993	-0.579631	0.0763781	0.426415	0.654644	-1.12886	0.638784	-2.48547
NEMVEDRAFT_v1g122091	A7SKW9	-2.53876	0.278335	0.648748	0	1.81564	0	-0.262678	0
NEMVEDRAFT_v1g122149	A7SL12	-1.18536	0.508424	-0.0527289	0.279478	0.382246	-0.169273	0.197177	-0.600043
NEMVEDRAFT_v1g122214	A7SKZ6	1.80794	-1.11419	-0.122167	-0.583416	-0.73463	0.811467	-1.75749	-0.175019
NEMVEDRAFT_v1g122325	A7SL65	2.09413	-0.875408	1.37626	-1.20122	-0.303948	1.19161	-1.78378	0.705631
NEMVEDRAFT_v1g122395	A7SLA0	2.69689	0.131342	2.2555	-0.726546	1.06692	1.17035	0.213243	0.89334
NEMVEDRAFT_v1g122407	A7SLA1	2.18506	0.425216	1.14718	-1.07233	-0.0295449	1.45127	-1.06828	1.13256
NEMVEDRAFT_v1g122732	A7SLG0	-1.1878	0.229637	-0.0736392	0	0.359868	0	0.075854	0
NEMVEDRAFT_v1g122914	A7SLN0	-0.944907	0.259633	0.0891753	0.136194	0.515169	0.194371	0.207302	-0.934085
NEMVEDRAFT_v1g122926	A7SLM5	1.85364	-0.314246	0.686111	-1.73653	-1.44945	1.50359	-0.860651	2.1403
NEMVEDRAFT_v1g122951	A7SLS9	-1.16458	-0.733418	0.302973	0.781111	0.942995	-1.01696	0.309553	-1.10904
NEMVEDRAFT_v1g12304	A7SB30	2.15866	-0.397272	0.529548	-1.15962	-1.99207	0.942051	-3.77674	1.0142
NEMVEDRAFT_v1g12306	A7SUW5	0.875173	0.367137	1.09469	-1.14669	0.674052	1.04922	0.718756	1.11872
NEMVEDRAFT_v1g123078	A7SLV8	-0.83943	-0.179714	0.241376	0	0.78012	0	0.21779	0
NEMVEDRAFT_v1g123397	A7SM60	-1.95452	-0.770993	1.80668	1.17492	2.08453	-3.96618	2.39777	-3.07624
NEMVEDRAFT_v1g123439	A7SM61	-2.25454	-1.34572	0.878606	1.41937	1.93317	-3.93462	0.324567	-2.86862
NEMVEDRAFT_v1g123720	A7SME6	-2.55942	0.593997	1.94232	0.1248	3.16351	-1.58224	0.791796	0.00924012
NEMVEDRAFT_v1g123758	A7SMI4	-2.45975	-1.01139	0.363859	1.62813	0.295801	-2.92422	1.23182	-2.82273
NEMVEDRAFT_v1g123880	A7SML3	2.30483	-1.54441	1.7939	-0.191376	-0.303853	-0.355151	1.0816	1.0203
NEMVEDRAFT_v1g123924	A7SMP4	0.691548	-0.209218	-0.0201106	0	-0.682325	0	-0.105919	0
NEMVEDRAFT_v1g124120	A7SMS9	-2.15851	-0.88787	-0.322835	1.10771	0.251756	-1.88182	0.0463677	-2.30751
NEMVEDRAFT_v1g124123	A7SMV6	-0.889257	-0.36265	0.427292	0.569319	0.437353	-0.671799	0.979795	-0.787568
NEMVEDRAFT_v1g124130	A7SMV5	-3.37431	1.41536	-0.567928	-2.00762	-0.417946	1.9323	0.158317	-1.08475
NEMVEDRAFT_v1g124247	A7SMY0	-1.72418	1.6198	-1.09621	-0.509179	-0.826848	-0.257397	-1.06013	0.259823
NEMVEDRAFT_v1g124307	A7SMY7	-2.22299	1.26002	-0.821241	-0.183115	-1.02754	-0.292737	0.00476906	-0.556571
NEMVEDRAFT_v1g124608	A7SNB7	-2.60125	2.30125	-0.171094	-1.32889	-1.01817	1.1703	0.88012	0.639471
NEMVEDRAFT_v1g124644	A7SNB8	-2.78153	1.35379	0.749573	-0.357886	0.00528197	0.0609333	1.90866	-0.625526
NEMVEDRAFT_v1g124717	A7SNF6	-4.56862	-0.910101	1.1192	2.11394	1.91693	-3.38285	1.3988	-2.81746
NEMVEDRAFT_v1g124772	A7SNF5	-3.45404	-0.480101	1.04382	1.74962	1.54126	-2.61958	1.61913	-2.6396
NEMVEDRAFT_v1g124800	A7SNG7	-2.34844	1.17514	-0.876374	-1.72195	-0.457357	2.90358	-0.578377	0.0671107
NEMVEDRAFT_v1g124860	A7SNI7	2.4917	-2.80251	0.213472	-0.365906	-1.77801	-2.42854	-2.7147	0.422178
NEMVEDRAFT_v1g124861	A7SNH6	0.662493	-0.501815	0.281433	0	-0.146369	0	0.326201	0
NEMVEDRAFT_v1g124869	A7SNG6	-1.88585	0.310035	0.347042	0.670053	0.757317	-0.277598	0.868724	-1.91965
NEMVEDRAFT_v1g124892	A7SNI4	2.24144	-2.29949	2.09277	-2.62005	-0.757039	0.959843	0.491192	4.27126
NEMVEDRAFT_v1g124911	A7SNJ9	-4.06629	-0.0378015	0.467984	1.19101	0.874301	-2.00832	1.15673	-1.79156
NEMVEDRAFT_v1g124985	A7SNN8	0.668751	-0.00563874	0.581536	-0.344788	0.0617834	0.123003	0.485501	1.08735
NEMVEDRAFT_v1g125015	A7SNM7	-3.2424	2.35019	0.408737	-0.710339	0.639483	-1.7734	0.9252	0.226449
NEMVEDRAFT_v1g125072	A7SNM5	-3.94812	0.83875	3.42924	1.03012	3.80768	-3.85226	4.10696	-1.65967
NEMVEDRAFT_v1g125202	A7SNS9	-1.86986	1.08883	-0.257317	0.106237	0.0128975	0.0420712	0.202599	-0.342606
NEMVEDRAFT_v1g125486	A7SNW9	-1.10432	-0.508822	0.0592396	0.438391	0.499086	-0.532309	0.316839	-0.240015
NEMVEDRAFT_v1g125496	A7SNZ9	-2.82965	1.31285	-1.69959	-1.16608	-1.15742	0.34856	-1.45756	-0.649524
NEMVEDRAFT_v1g125536	A7SP07	0.922651	-0.626629	0.723093	-0.137615	0.686902	-0.988858	0.135049	-0.475039
NEMVEDRAFT_v1g125537	A7SP16	1.2011	0.397995	-0.258478	-1.75307	-1.29979	2.14965	-1.41056	2.25501
NEMVEDRAFT_v1g125541	A7SNZ6	-3.27559	1.66446	1.54887	-0.354106	1.17798	-0.164738	2.61001	0.17284
NEMVEDRAFT_v1g125566	A7SP06	1.43331	-0.447034	0.63313	0	0.0049859	0	-0.420041	0
NEMVEDRAFT_v1g12563	A7S8M2	2.20219	0.324472	2.16299	-0.65365	1.81199	-4.26258	0.719149	0.429016
NEMVEDRAFT_v1g125653	A7SP46	-5.47351	-0.405737	0.9282	1.15436	0.433156	-2.49584	2.05472	-0.674823
NEMVEDRAFT_v1g125664	A7SP48	-2.39568	0.333374	0.0580405	-0.282355	0.845718	-0.161015	0.14583	0.877485
NEMVEDRAFT_v1g125705	A7SP50	-5.84218	-0.943759	-2.7246	-1.848	-2.17848	1.39064	-2.37812	0.871478
NEMVEDRAFT_v1g125838	A7SPA1	0.84395	-0.355397	0.822016	-0.364675	0.490303	0.0946595	0.505428	0.921701
NEMVEDRAFT_v1g125984	A7SPF0	-1.62423	-1.67709	0.11521	0.683042	0.786409	-0.213364	0.256624	-2.39974
NEMVEDRAFT_v1g126009	A7SPG8	-1.0599	-0.407633	-0.45353	0.56201	-0.70735	-1.04683	0.0213943	-0.937883
NEMVEDRAFT_v1g126046	A7SPG5	-3.66827	2.69318	-0.718594	-2.32188	-1.48078	1.35342	0.466961	2.10089
NEMVEDRAFT_v1g126147	A7SPI8	1.07961	0.163324	0.182558	-0.320534	-0.875909	0.731968	0.018744	-5.2e-05
NEMVEDRAFT_v1g126282	A7SPQ0	-1.77649	0.754202	-0.670274	0	-0.101985	0	-0.699952	0
NEMVEDRAFT_v1g126293	A7SPR4	-1.7516	-0.35282	0.99093	1.66768	0.687027	-3.97906	1.90421	-1.97091
NEMVEDRAFT_v1g126308	A7SPQ1	-3.68724	0.275858	0.332177	0.622215	1.24215	-1.35929	0.278803	-0.916787
NEMVEDRAFT_v1g126362	A7SPT5	1.56296	-0.438132	0.812979	-2.03582	-0.99885	1.17489	-0.334505	2.71007
NEMVEDRAFT_v1g12640	A7SJ57	0.61495	-0.426563	0.39282	0	-0.109035	0	0.449511	0
NEMVEDRAFT_v1g126496	A7SPX8	-4.41399	0.389458	1.10292	1.17956	1.63798	-3.53054	1.58828	-2.7536
NEMVEDRAFT_v1g127124	A7SQ58	1.04048	-0.0751832	0.44324	-0.449842	0.00697415	-0.470566	-0.22376	1.06449
NEMVEDRAFT_v1g127136	A7SQ54	1.08632	0.493446	0.446628	-1.42321	0.0726905	1.05367	-0.708974	2.17714
NEMVEDRAFT_v1g127144	A7SQ53	0.866274	0.249503	0.951753	-0.421305	0.998344	-0.372083	0.24143	0.769479
NEMVEDRAFT_v1g127166	A7SQ46	-2.28788	1.25035	-0.00658487	0.191027	0.173382	-2.10349	0.565406	-0.301746
NEMVEDRAFT_v1g127187	A7SQA0	-2.55158	1.0871	-0.443395	-0.524478	-0.723098	-0.0302777	0.490235	0.859786
NEMVEDRAFT_v1g127202	A7SQA3	-2.37357	0.80502	-0.846722	-0.0324995	-1.36391	-0.0673804	0.146237	0.446452
NEMVEDRAFT_v1g127215	A7SQ95	-4.64231	-1.10972	3.04027	2.57063	3.83916	-3.51552	3.32812	-4.31695
NEMVEDRAFT_v1g127233	A7SQ76	-1.55849	0.940462	0.281252	-0.307689	0.718211	0.123511	0.644601	-0.236541
NEMVEDRAFT_v1g127328	A7SQD2	1.92558	-1.2569	0.610807	-1.45648	-0.448347	1.8955	-0.503643	1.94723
NEMVEDRAFT_v1g12742	A7SB67	1.40258	-0.793725	1.88187	-0.376843	0.760253	-1.55758	1.65176	0.857089
NEMVEDRAFT_v1g127462	v1g127462	7.80459	-4.98146	6.30035	-10.4513	-3.91279	5.17175	-4.1125	11.7332
NEMVEDRAFT_v1g127465	A7SQF1	2.68512	-2.05195	1.21646	-2.66567	-4.98591	0.992583	0.713367	2.64578
NEMVEDRAFT_v1g127472	A7SQF0	2.57517	-2.08702	1.0303	-2.34224	-4.13196	1.37911	0.764452	1.21153
NEMVEDRAFT_v1g127482	A7SQF4	6.78051	-5.30505	7.34006	-8.03254	-2.14725	1.57581	3.41893	8.47251
NEMVEDRAFT_v1g127544	A7SQF5	9.096	2.87563	6.16555	-5.27499	-7.47445	1.71231	-3.9097	4.0293
NEMVEDRAFT_v1g127657	A7SQK1	1.47546	-0.367814	1.60757	-1.71783	0.986682	0.665121	0.346117	2.96184
NEMVEDRAFT_v1g127675	A7SQL8	-1.04073	0.634864	0.0407719	0	0.317232	0	0.307782	0
NEMVEDRAFT_v1g127721	A7SQL0	-1.10775	0.0147167	0.294441	0	0.58129	0	0.618319	0
NEMVEDRAFT_v1g127820	A7SQR7	-3.93998	0.371768	2.14379	1.77129	2.73177	-2.17623	2.65918	-4.83062
NEMVEDRAFT_v1g127845	A7SQR8	-4.02308	0.86762	2.99414	1.40113	3.43798	-1.66043	3.64671	-3.43739
NEMVEDRAFT_v1g127852	A7SQR4	1.50849	-0.690804	0.503949	-0.330678	-1.04096	-0.14515	-0.323109	1.13148
NEMVEDRAFT_v1g128042	A7SQV2	0.996721	-0.403489	0.737327	0	0.192975	0	0.172699	0
NEMVEDRAFT_v1g128053	A7SQV9	-1.76135	0.570758	0.397756	0.463988	0.915865	-0.110259	0.712224	-1.52101
NEMVEDRAFT_v1g128497	A7SR75	-5.84174	0.816516	-1.65536	-1.79815	-2.20242	1.87304	-0.503689	0.627057
NEMVEDRAFT_v1g128500	A7SR69	-0.86461	-0.0224305	0.215292	0	0.472058	0	0.579498	0
NEMVEDRAFT_v1g128631	A7SRA3	-2.38771	-0.493033	0.330692	0.468573	0.645344	0.347654	0.991208	-0.124911
NEMVEDRAFT_v1g128647	A7SR94	0.74514	0.350888	0.271447	-0.320433	-0.0746148	-0.246898	-0.13948	0.41013
NEMVEDRAFT_v1g128716	A7SRE0	1.5502	-0.838421	1.34467	-0.259485	-0.0613701	-0.748777	1.21411	0.839546
NEMVEDRAFT_v1g128719	A7SRD2	3.265	-1.44019	3.51883	1.43501	0	-2.47551	0	-1.29638
NEMVEDRAFT_v1g12872	A7T115	1.36247	-0.639268	0	0.736612	0	-2.12744	0	0.0313717
NEMVEDRAFT_v1g128741	A7SRD9	1.85247	-0.970966	1.09058	-0.0233232	0.750587	-0.877653	-0.744629	0.867531
NEMVEDRAFT_v1g128751	A7SRD5	0.976819	-2.32649	0.440161	1.66867	-0.960499	-4.25893	0.718719	-2.08329
NEMVEDRAFT_v1g128880	A7SRI3	1.16816	-0.0883854	1.08449	-1.9655	0.0686928	0.499882	0.765678	2.72985
NEMVEDRAFT_v1g128910	A7SRL1	-3.04388	-0.581465	0.92975	1.20627	0.233678	-0.8755	2.12559	-1.942
NEMVEDRAFT_v1g129106	A7SRS8	-1.76094	-0.60926	0.196492	1.03925	1.20018	-0.925306	-0.282195	-1.70028
NEMVEDRAFT_v1g129189	A7SRX1	0.978312	-0.0232978	0.831007	0	-0.249685	0	0.889949	0
NEMVEDRAFT_v1g129266	A7SRZ2	-1.79196	-1.48683	-0.538653	0.953153	0.0789652	-1.55226	-0.371493	-2.38991
NEMVEDRAFT_v1g129440	A7SS47	-0.861951	-0.0875971	-0.166711	-0.0890668	0.12992	0.264219	0.0267939	-1.23337
NEMVEDRAFT_v1g129447	A7SS64	-4.30214	0.351468	2.84981	1.09528	2.91061	-1.03849	3.78136	-2.16312
NEMVEDRAFT_v1g129467	A7SS63	-1.28128	0.88041	-0.624193	-0.0851295	-0.0382425	-1.34717	-0.639619	-1.35216
NEMVEDRAFT_v1g129689	A7SS88	-7.57618	-4.38661	0.886759	-4.28085	2.19865	4.89628	-0.214123	1.37218
NEMVEDRAFT_v1g129769	A7SSC1	-1.45001	0.335582	-0.0174597	-0.547213	-0.757068	-0.116795	0.997016	1.46335
NEMVEDRAFT_v1g129785	A7SSB6	-5.39677	-0.645948	0.126412	-0.952403	-1.04089	-0.817666	1.26203	2.74498
NEMVEDRAFT_v1g129798	A7SSB8	-5.0712	-0.340889	0	-1.8632	0	-0.126135	0	3.61812
NEMVEDRAFT_v1g129920	A7SSH5	-1.3251	-0.283164	1.0348	0.501061	1.96048	0.135264	0.580374	-0.922698
NEMVEDRAFT_v1g130146	A7SSM6	-1.98835	0.86743	0.0120641	-1.10436	0.495764	1.61848	0.41386	0.0465471
NEMVEDRAFT_v1g130162	A7SSN4	-5.71504	1.20071	-0.902562	-1.3598	-1.35141	0.479755	0.21465	0.92211
NEMVEDRAFT_v1g130181	A7SSS1	-1.98612	0.513155	-0.0376926	0.872743	0.743368	-0.478067	-0.0182931	-1.88603
NEMVEDRAFT_v1g130205	A7SSP7	-1.51003	0.176399	0.0909778	0.609719	0.68062	-0.176063	0.30977	-1.82874
NEMVEDRAFT_v1g130385	A7SSX3	-2.1919	1.13908	0.391662	-0.334806	-0.223791	0.956219	1.37835	-1.12795
NEMVEDRAFT_v1g130466	A7SSZ3	1.33261	-0.256101	0.791666	-0.772823	0.0435093	0.706888	0.0334036	1.02679
NEMVEDRAFT_v1g130720	A7ST61	0.687696	0.415072	0.331897	-0.37894	0.103031	0.743196	-0.112913	0.496265
NEMVEDRAFT_v1g130873	A7ST96	-2.06509	0.538658	0.301042	0	0.790712	0	0.759685	0
NEMVEDRAFT_v1g130907	A7STC1	-0.892063	-0.481065	-0.825367	0.617933	-0.561452	-0.806277	-0.682837	-0.814102
NEMVEDRAFT_v1g130928	A7STB9	-2.45963	2.05976	-0.594469	-2.0068	0.427736	3.027	-1.01858	0.608176
NEMVEDRAFT_v1g130991	A7STC4	-1.1586	0.491536	-0.148473	0.341107	0.0874623	-0.310822	0.0998897	-1.18354
NEMVEDRAFT_v1g131020	A7STG0	1.00736	-0.029556	0.982435	0.0517475	0.600514	0.919479	0.925231	-1.02642
NEMVEDRAFT_v1g131049	A7STF7	-0.907043	-0.814737	-0.189112	0.90515	0.11785	-2.5662	0.0866817	-1.03893
NEMVEDRAFT_v1g131148	A7STH6	1.1469	-0.138199	0.0815893	-0.0689852	-0.450208	-0.55716	-1.20634	0.936831
NEMVEDRAFT_v1g131171	A7STJ7	1.19181	0.108672	0.370423	-0.38027	-0.691009	0.357356	-0.448194	0.994465
NEMVEDRAFT_v1g131229	A7STK3	-2.01732	0.362353	-0.350279	0.89797	-0.553738	-1.84833	0.54791	-1.24968
NEMVEDRAFT_v1g131304	A7STN0	1.54602	-1.248	1.08405	-0.219151	0.562813	-1.00033	0.266887	1.78557
NEMVEDRAFT_v1g131345	A7STP3	-2.13159	-1.09557	-0.104787	1.13595	0.747673	-2.29285	-0.164686	-2.27302
NEMVEDRAFT_v1g131388	A7STR2	2.92413	-1.4004	3.87611	-1.66763	1.09462	0.566095	1.9677	2.94624
NEMVEDRAFT_v1g131390	A7STR7	1.27806	-0.520956	1.32309	-0.937503	0.203027	0.7174	1.08136	1.39319
NEMVEDRAFT_v1g131533	A7STT7	-2.00362	0.134111	-1.01699	0	-2.0074	0	0.100048	0
NEMVEDRAFT_v1g13173	A7SLZ3	1.2028	-0.451523	0.943738	-1.36884	0.491936	0.956437	0.416593	2.22124
NEMVEDRAFT_v1g131865	A7SU58	-4.00701	-1.67874	0.938576	2.43473	1.64594	-4.42133	1.31925	-3.43561
NEMVEDRAFT_v1g132050	A7SUB3	-1.36953	-0.0146649	-0.5558	0.114051	-0.185889	-0.128146	-0.230477	-1.0414
NEMVEDRAFT_v1g132320	A7SUK6	0.830685	0.0130731	-0.147416	-0.882516	-0.454676	0.788687	-0.793238	1.42267
NEMVEDRAFT_v1g132328	A7SUL3	-2.17889	1.00146	-1.55556	-0.639563	-1.70916	0.284696	-0.839225	-1.20293
NEMVEDRAFT_v1g132810	A7SUQ9	-4.42818	-2.16086	-0.356446	1.31576	1.02219	-1.34658	-1.9684	-1.78726
NEMVEDRAFT_v1g132811	A7SUR9	-3.02523	-0.682561	-0.326903	1.08776	0.0801887	0.253055	0.271902	-3.74204
NEMVEDRAFT_v1g132865	A7SUP5	0.772367	0.515376	0.627498	-0.729211	0.0511428	0.557317	0.479479	1.14428
NEMVEDRAFT_v1g133049	A7SUY0	1.86218	-0.666296	1.22188	-1.59219	-0.78935	0.768269	0.148584	2.03395
NEMVEDRAFT_v1g133491	A7SV02	0.918702	0.0821282	0.749312	-0.661996	0.552149	0.628802	0.290571	0.892213
NEMVEDRAFT_v1g133819	A7SV94	-1.68575	-1.65249	-0.0157507	1.89126	0.937947	-2.2956	-0.372492	-2.23855
NEMVEDRAFT_v1g134128	A7SVH6	0.644806	-0.442957	-0.373805	0	-0.84051	0	-0.75783	0
NEMVEDRAFT_v1g134174	A7SVJ5	-6.32102	0.411028	0.156042	0.599342	0.970804	-0.19175	0.424862	-2.25201
NEMVEDRAFT_v1g134340	A7SVP9	-0.754572	-0.152149	0.214959	0.47488	0.818049	-0.94265	-0.0579963	-0.628714
NEMVEDRAFT_v1g13439	A7SP87	-2.09623	0.351438	-0.868105	0	-1.05743	0	-0.00443019	0
NEMVEDRAFT_v1g134601	A7SVZ5	-3.71096	1.33	-2.49332	-2.88877	-2.28271	2.53462	-2.17754	1.42565
NEMVEDRAFT_v1g134819	A7SW56	1.14273	-1.2055	0.113332	0.31192	-1.08947	-1.76769	-0.141162	0.530159
NEMVEDRAFT_v1g134873	A7SW72	1.04191	-0.140537	-0.0184941	-1.13119	-0.99318	0.830729	-0.652554	2.03036
NEMVEDRAFT_v1g134893	A7SW69	-1.07259	-0.0630951	-0.174148	0.69951	-0.0629552	-1.41774	0.190705	0.11454
NEMVEDRAFT_v1g135076	A7SWD8	-3.9854	0.519851	1.277	0.873791	1.94269	-2.90971	1.68657	-1.91612
NEMVEDRAFT_v1g135138	A7SWD1	-1.37553	-0.163135	-0.0777176	0.642114	0.085767	-0.930656	0.484681	-1.42972
NEMVEDRAFT_v1g13526	A7SB31	2.07215	0.384062	0.702768	-1.6578	-1.48843	1.90685	-2.82563	0.940482
NEMVEDRAFT_v1g13560	A7SUW2	-1.8519	-0.52853	0.232619	0.505039	0.37833	-0.902496	0.864527	0.683765
NEMVEDRAFT_v1g135849	A7SWT9	-0.840668	-0.00481072	0.131555	0	0.0856817	0	0.60921	0
NEMVEDRAFT_v1g135947	A7SWX2	-1.76506	-0.443155	-1.06094	0.498813	-0.765948	-1.28413	-0.549292	-0.887053
NEMVEDRAFT_v1g136066	A7SWY7	-3.02323	-0.120641	-0.362115	0.837358	0.296493	-1.50134	-0.100278	-1.71104
NEMVEDRAFT_v1g136185	A7SX17	0.902416	0.183634	0.276838	-1.07484	-0.237455	0.370658	-0.609662	1.74266
NEMVEDRAFT_v1g136229	A7SX30	1.006	-1.67411	0.399479	1.88005	-1.01026	-2.61737	0.440978	-1.83943
NEMVEDRAFT_v1g136284	A7SX44	-1.46126	0.0649101	-0.521016	0.544905	0.112398	-0.24262	-0.514505	-0.746313
NEMVEDRAFT_v1g136346	A7SX63	-1.22739	0.156042	-0.106469	0	0.22568	0	0.0942893	0
NEMVEDRAFT_v1g136737	A7SXI1	-2.4641	0.18265	-0.544316	-1.36841	0.133906	1.81688	-0.503728	-1.2336
NEMVEDRAFT_v1g136792	A7SXJ4	-2.71383	-1.18235	-1.11385	0.936478	-1.03745	-0.455533	-0.342711	-1.37161
NEMVEDRAFT_v1g136831	A7SXJ9	-1.34993	0.27614	-0.0130706	0.117978	0.364597	0.0423501	0.292779	-1.6058
NEMVEDRAFT_v1g136836	A7SXK1	-1.80918	0.0478482	0.476894	0.551622	1.0326	-0.342728	0.69051	-1.27874
NEMVEDRAFT_v1g136840	A7SXK5	0.87169	-0.226141	0.339526	0	-0.806962	0	0.307534	0
NEMVEDRAFT_v1g136901	A7SXN1	1.33905	-0.0969579	0.241219	-1.67435	-1.5657	1.17084	-0.498227	1.97402
NEMVEDRAFT_v1g137089	A7SXS4	-1.81876	0.417563	-0.432742	0.0167711	-0.767005	-2.05935	0.50634	-1.27863
NEMVEDRAFT_v1g137132	A7SXS6	-2.36692	-1.21129	-0.28763	1.38845	-0.175639	-3.92546	0.409952	-1.89798
NEMVEDRAFT_v1g137233	A7SXW1	-5.47571	0.97933	-0.586318	-2.29451	-0.0974357	2.8826	-0.11651	0.846626
NEMVEDRAFT_v1g137394	A7SY11	-6.48029	2.74479	-0.000365309	-3.9972	-6.70056	3.93778	1.57575	4.1489
NEMVEDRAFT_v1g137553	A7SY47	3.05409	-4.96933	1.27281	1.3414	-0.432296	0.771503	-7.50085	-4.47731
NEMVEDRAFT_v1g137581	A7SY71	-3.84732	1.39337	0.0263948	0.187413	0.611852	-3.76531	0.518456	-1.25239
NEMVEDRAFT_v1g137645	A7SY95	-1.15617	0.513038	0.68774	0.507881	1.12493	-1.21012	0.750097	-1.27135
NEMVEDRAFT_v1g137654	A7SY89	1.18571	-0.340032	0.993151	-0.886643	0.267967	-0.0221709	0.886832	1.53396
NEMVEDRAFT_v1g137684	A7SY85	-0.726723	0.311002	0.61488	0	0.889866	0	0.814521	0
NEMVEDRAFT_v1g137721	A7SYA8	-0.927585	0.573645	0.257244	0.218763	0.553018	-0.208221	0.555868	-0.907517
NEMVEDRAFT_v1g137797	A7SYE0	-7.8658	0.733112	0.538578	2.81353	2.12312	-9.39615	-7.67416	-8.95349
NEMVEDRAFT_v1g137807	A7SYF1	-2.08538	-0.634719	-0.424103	0.950934	0.743408	-1.88067	-1.60327	-1.74305
NEMVEDRAFT_v1g137904	A7SYH2	-1.29384	1.1591	-0.940349	-0.575407	-0.537793	0.678905	-0.824718	0.127142
NEMVEDRAFT_v1g138104	A7SYN7	1.44231	-1.27151	1.03257	-0.758847	-0.0492597	-0.44201	0.651795	1.81288
NEMVEDRAFT_v1g138161	A7SYQ4	-2.36922	2.57832	0.75057	-1.87364	1.17618	1.43491	1.17928	0.292289
NEMVEDRAFT_v1g138346	A7SYV4	1.21869	0.0701849	-0.649501	-1.01289	-1.61835	1.66061	-1.68305	-0.393786
NEMVEDRAFT_v1g138669	A7SZ22	-0.668219	0.126843	-0.397891	0	-0.387806	0	-0.226763	0
NEMVEDRAFT_v1g138675	A7SZ33	1.0041	-0.0670837	0.293179	0.104702	-0.501022	-0.805552	0.0502692	-0.538126
NEMVEDRAFT_v1g138693	A7SZ27	-1.22149	0.168004	0.703513	0.673541	1.18224	-0.395583	0.960403	-0.64715
NEMVEDRAFT_v1g138962	A7SZB0	-1.35005	0.81219	0.77646	-0.331202	0.724636	0.887201	1.48186	-0.751255
NEMVEDRAFT_v1g139065	A7SZD6	-2.12972	0.353073	-0.386932	-0.126115	0.0690839	-1.06847	-0.244603	1.14641
NEMVEDRAFT_v1g139177	A7SZH8	3.11079	-0.420883	2.51449	-2.57295	-3.33035	2.15445	-0.503305	3.28891
NEMVEDRAFT_v1g139364	A7SZQ6	-1.94513	-0.801615	0.604212	1.21532	1.39958	-1.70199	0.641028	-1.66857
NEMVEDRAFT_v1g139465	A7SZT1	1.8336	-0.585456	3.5169	-2.23007	3.06378	2.39648	3.0915	2.9801
NEMVEDRAFT_v1g139747	A7T002	-1.39071	-0.669168	0.372908	0.356225	1.25601	-0.261598	-0.00504557	-0.241119
NEMVEDRAFT_v1g139805	A7T022	0.894254	-1.59812	0.602444	0.915576	0.221383	-1.68981	0.560483	-0.632019
NEMVEDRAFT_v1g139870	A7T035	5.42447	-6.96753	2.72932	-2.4102	-7.41893	-1.87943	-7.61869	4.0891
NEMVEDRAFT_v1g140088	A7T090	1.7969	-1.77943	2.05443	1.60784	1.28124	-1.54127	1.37114	-0.892384
NEMVEDRAFT_v1g140211	A7T0C4	1.84464	0.0977018	1.44708	-0.600998	0.363529	0.305178	0.163829	0.416467
NEMVEDRAFT_v1g140371	A7T0G8	-1.84155	-0.378011	0.102808	1.46859	0.530034	-2.33775	0.478769	-2.30739
NEMVEDRAFT_v1g140376	A7T0G6	-1.08468	-0.191031	-0.0201364	0.506477	0.324088	-0.953854	0.190703	-1.93589
NEMVEDRAFT_v1g140474	A7T0J8	-0.922135	-0.538513	0.233714	1.25952	0.77833	-0.597486	0.249422	-1.76945
NEMVEDRAFT_v1g140489	A7T0I9	1.95951	-0.383592	0.167806	-2.04673	-1.45289	2.65852	-2.71675	2.81547
NEMVEDRAFT_v1g140545	A7T0K9	-2.9129	-1.37323	0.587781	1.98211	1.39073	-3.81347	0.749616	-2.55098
NEMVEDRAFT_v1g140836	A7T0U2	0.782028	0.286284	-0.12591	-0.534734	-0.784178	0.607771	-0.543809	0.872894
NEMVEDRAFT_v1g140839	A7T0U5	-2.10741	-0.200154	0.0906613	0.417892	0.966796	-0.158082	-0.0145125	-0.829365
NEMVEDRAFT_v1g140889	A7T0W8	2.77915	-0.832926	6.27628	1.10241	5.89322	-1.47319	0	-5.93219
NEMVEDRAFT_v1g141095	A7T0Z4	3.85374	-3.42128	2.00031	-0.331566	-4.42203	-3.14906	-3.43732	1.5472
NEMVEDRAFT_v1g141543	A7T192	-6.75328	-1.29635	-0.939461	-0.808732	-5.83385	-2.09274	0.538206	1.49049
NEMVEDRAFT_v1g141592	A7T1A5	-6.22301	0.424656	0.2077	1.15208	-0.0726126	-1.92624	1.27666	-1.1427
NEMVEDRAFT_v1g141657	A7T1D7	-1.50741	-0.446874	-0.606941	0.166075	-0.528874	-2.0743	-0.0701942	0.320511
NEMVEDRAFT_v1g141683	A7T1E7	-2.45852	-0.765241	1.34336	0.86598	2.36473	-0.195643	1.08131	-0.985092
NEMVEDRAFT_v1g141685	A7T1E2	-3.59281	0.738038	0.55257	0.190354	1.66545	0.434854	0.12116	-0.587312
NEMVEDRAFT_v1g141731	A7T1G4	-4.85172	-5.71701	3.21201	-4.22784	4.6872	5.00006	0.344368	-0.715543
NEMVEDRAFT_v1g142057	A7T1P3	1.26101	-0.674602	1.6212	-1.67399	0.68844	-0.787279	1.26188	3.07555
NEMVEDRAFT_v1g14218	A7SM15	1.34922	-0.0552366	0.322558	-2.47483	-0.710618	1.06162	-1.12715	3.59702
NEMVEDRAFT_v1g142234	A7T1U1	-4.13818	-1.7664	2.98795	2.17558	1.58465	-2.48161	4.34903	-2.17581
NEMVEDRAFT_v1g142266	A7T1V0	1.30187	-0.443658	0.515139	0	0.0253566	0	-0.234485	0
NEMVEDRAFT_v1g142315	A7T1X3	-1.12381	0.0778237	0.126476	0	0.349785	0	0.545982	0
NEMVEDRAFT_v1g142440	A7T1Z1	2.11489	-2.78794	1.6144	3.25793	1.28166	-5.67821	0.233896	-5.23554
NEMVEDRAFT_v1g142447	A7T1Z4	2.2941	-1.26421	3.90726	0	3.4595	0	2.52288	0
NEMVEDRAFT_v1g142766	A7T261	-2.14042	-1.34011	-0.5185	0.473531	0.169114	-0.831163	-0.547425	-3.02814
NEMVEDRAFT_v1g142804	A7T273	-3.01181	0.980062	0.82032	-0.0690958	0.187426	0.69404	1.98935	-0.232752
NEMVEDRAFT_v1g142868	A7T295	1.31673	-0.349512	-0.0353924	-1.22547	-1.04097	1.48213	-1.06007	1.61148
NEMVEDRAFT_v1g142985	A7T2D3	-5.81973	2.16248	1.58662	-2.76346	1.07475	1.91455	2.72942	1.87149
NEMVEDRAFT_v1g143195	A7T2J6	-2.53236	-1.09464	0.377818	2.19187	0.795333	-2.97558	0.967517	-2.78175
NEMVEDRAFT_v1g143331	A7T2N5	-5.03642	-0.565121	0.342218	-0.277826	1.52224	1.32005	-0.262558	0.0169009
NEMVEDRAFT_v1g143435	A7T2S1	2.18385	-2.79794	2.98751	-0.0481437	1.28108	-1.79798	1.56684	1.65864
NEMVEDRAFT_v1g143455	A7T2S7	7.11446	-3.75755	6.21379	-6.13889	-1.04092	1.616	-4.2681	0.473507
NEMVEDRAFT_v1g143492	A7T2U5	-2.12021	-0.681104	0.252194	1.203	1.038	-2.63459	0.0473426	-1.10237
NEMVEDRAFT_v1g143617	A7T2Y6	1.37138	0.998329	0.423829	-0.307528	-0.303924	0.468866	-0.343112	-4.23117
NEMVEDRAFT_v1g143837	A7T335	-2.97705	0.490478	-0.957692	-0.614134	-0.597208	0.0563366	-0.438873	-1.52873
NEMVEDRAFT_v1g143839	A7T334	4.50026	-3.18788	3.66546	-5.85015	2.71933	2.79057	0	0
NEMVEDRAFT_v1g144110	A7T398	1.8268	-0.137245	0.579451	-0.875536	-1.40357	2.01234	0.233454	-1.45262
NEMVEDRAFT_v1g14428	A7SL76	0.745452	-0.0539658	0.564941	-0.911768	0.083056	0.925064	0.439734	1.38596
NEMVEDRAFT_v1g144802	A7T3U7	-1.96799	-1.091	-0.754474	0.999191	-0.544992	-7.34896	-0.297221	0.0907017
NEMVEDRAFT_v1g14522	A7SUB7	2.83958	-1.56914	1.52264	-1.40777	-0.956032	-0.818465	-1.1557	2.24317
NEMVEDRAFT_v1g145813	A7T4Q4	-4.86289	-0.278322	0.840394	0.759279	1.07498	-5.53966	1.56736	-5.097
NEMVEDRAFT_v1g146109	A7T4Y3	1.08908	-1.5724	0.790818	1.3464	0.363475	-3.26808	0.51041	-1.61493
NEMVEDRAFT_v1g146162	A7T505	9.46698	-0.549564	7.3024	1.10935	0.544077	0.25353	-4.26802	-3.5536
NEMVEDRAFT_v1g146208	A7T514	0.829929	-0.0558712	1.1828	0.129843	1.06568	-0.300725	0.847955	-0.625191
NEMVEDRAFT_v1g146503	A7SH99	-5.87148	-0.63875	0.903642	1.73673	0.853676	-2.04156	1.86215	-1.59911
NEMVEDRAFT_v1g146869	A7T5L1	2.92297	-2.11179	2.06116	-2.17133	-0.920647	1.14638	-1.85732	2.99017
NEMVEDRAFT_v1g147055	A7T5S0	-6.56837	-2.61308	0.827128	0.0969797	1.28112	-1.05087	1.37095	-2.04907
NEMVEDRAFT_v1g147113	A7T5U2	-5.74359	-0.863654	1.00628	1.75238	1.09467	-3.4231	1.86992	-1.70048
NEMVEDRAFT_v1g147236	A7T5Y2	1.09367	-0.220001	0.074505	0.225706	-0.394166	0.782313	-0.41878	-1.15675
NEMVEDRAFT_v1g147330	A7T600	2.46116	-0.0460049	0.24986	0	-2.96711	0	-3.16673	0
NEMVEDRAFT_v1g147359	v1g147359	-7.04209	-8.55235	1.54193	-0.503536	2.24641	1.11035	1.97451	1.68599
NEMVEDRAFT_v1g147627	A7T6A1	-5.42024	-0.381171	-0.569408	0.422282	0.998798	-6.58211	-5.85284	-0.790484
NEMVEDRAFT_v1g147871	A7T6I0	1.21669	0.0511016	1.21105	-1.04751	0.844968	1.14185	0.58753	1.53288
NEMVEDRAFT_v1g14817	A7SXH0	-2.64962	0.367784	1.44174	1.40465	2.19314	-2.95373	1.5756	-1.57086
NEMVEDRAFT_v1g148395	A7T6Z0	-5.64318	0.835631	2.4562	0	2.35922	0	3.40356	0
NEMVEDRAFT_v1g148593	A7T763	3.0837	-1.58809	4.10261	0	3.45896	0	2.52228	0
NEMVEDRAFT_v1g148607	A7T773	3.34563	-0.899754	2.65515	-7.05107	1.08085	3.07101	-1.78721	9.19698
NEMVEDRAFT_v1g148883	A7T7H6	0.795397	0.0196455	0.0710696	-0.283802	-0.453376	0.909908	-0.167644	-0.23263
NEMVEDRAFT_v1g148938	A7T7J1	-5.2712	0.777591	0.556657	-1.09775	0.324233	0.11385	1.59188	0.0706475
NEMVEDRAFT_v1g148990	A7T7K8	3.42095	-1.82449	1.75938	-0.642574	-0.245978	-0.977919	0.0233918	2.45511
NEMVEDRAFT_v1g149608	A7T817	-5.41847	-0.292509	0.0391051	0.175408	0.647247	-1.38197	0.447547	-0.939551
NEMVEDRAFT_v1g149970	A7T8B0	3.84885	-2.93688	2.44863	1.29339	0	-1.77848	0	-2.55882
NEMVEDRAFT_v1g149996	A7T8C0	-2.79527	-0.22186	0.812874	-0.488691	0.256333	1.03615	1.94611	-0.557713
NEMVEDRAFT_v1g150238	A7T8I0	1.48506	-0.624491	0.96553	-0.616332	-0.0347691	-0.199877	0.319469	1.48262
NEMVEDRAFT_v1g150523	A7T8S7	1.19265	-0.579802	1.39869	-0.54484	0.73793	-0.696153	1.24186	1.02658
NEMVEDRAFT_v1g151187	A7T9D4	1.63821	-1.28552	1.77736	0.0131077	1.28124	-2.70968	1.0425	0.166225
NEMVEDRAFT_v1g151278	A7T9F7	-2.07408	-1.92042	0.253465	1.52062	1.00159	-2.64214	0.338269	-1.74503
NEMVEDRAFT_v1g151519	A7T9N6	3.47145	-5.24652	3.78097	1.26247	2.72195	-4.66736	0	0.386416
NEMVEDRAFT_v1g151560	A7T9Q3	-6.48669	-1.18677	-0.001124	1.32257	0.716601	-0.831713	0.389477	-2.26388
NEMVEDRAFT_v1g151670	A7T9U3	-5.16366	-5.0109	1.61176	-1.90868	2.0792	2.10307	2.27	1.7102
NEMVEDRAFT_v1g151849	A7T9Z8	-5.25374	-1.47625	0.761158	1.28424	0.774133	-1.68129	1.61198	-1.68633
NEMVEDRAFT_v1g151901	A7TA10	6.29953	-5.50059	4.30891	1.4479	0	0.645368	0	-1.23812
NEMVEDRAFT_v1g152311	A7TAF4	-2.74596	-1.17816	0.15502	0.671362	0.0868427	-0.0420048	1.03796	-2.48008
NEMVEDRAFT_v1g15302	A7SCE7	-3.66644	-1.50742	0.602857	2.43438	1.24859	-3.2755	1.03508	-3.01917
NEMVEDRAFT_v1g153111	A7TB60	2.18706	-0.608676	1.42756	-1.33322	-0.740086	1.05531	-0.77929	1.272
NEMVEDRAFT_v1g153248	A7TB94	-2.4954	-0.000507282	-0.703702	-1.5276	-0.303991	-0.0791086	-0.169283	0.704426
NEMVEDRAFT_v1g154243	A7TC06	1.17425	-0.254672	0.800209	-1.236	-0.117559	0.532262	0.4197	1.87659
NEMVEDRAFT_v1g154490	A7TC71	2.22555	0.0921556	2.94334	-1.19198	1.62213	1.75474	0.633916	1.95631
NEMVEDRAFT_v1g15511	A7SYU5	-1.83228	-0.282411	0.998792	-0.777962	1.4014	-0.0106126	1.38225	-0.449509
NEMVEDRAFT_v1g1563	A7T4U1	-1.50655	-0.618368	-0.687474	0.789692	-0.0807361	-0.823596	-0.565409	-1.01493
NEMVEDRAFT_v1g157705	A7REU8	-0.61258	0.778827	-0.23746	-0.992943	0.240485	0.279765	-0.523037	0.156289
NEMVEDRAFT_v1g157740	A7REX4	1.14253	-0.918053	0.940379	-0.977303	0.51735	0.536893	0.36107	1.56868
NEMVEDRAFT_v1g157742	A7REX6	2.61618	-2.1571	2.83667	-2.45887	0.614187	0.447532	1.14162	3.97194
NEMVEDRAFT_v1g157776	A7REZ9	1.17881	-0.945177	0.710772	0.249638	0.0843208	-0.772135	0.563965	0.180839
NEMVEDRAFT_v1g157829	A7RF96	-1.2632	-0.916529	-0.490406	1.00732	0.401397	-1.68329	-0.998144	-1.43211
NEMVEDRAFT_v1g157862	A7RFB6	-2.31145	-0.53061	-0.329479	0.814389	-0.161376	-2.92015	0.348475	-1.04873
NEMVEDRAFT_v1g157973	A7RFN2	-2.61564	-0.166006	0.405108	1.38033	1.41524	-1.72102	0.163386	-1.44532
NEMVEDRAFT_v1g158003	A7RFQ9	0.873381	-0.944084	0.727953	-0.455778	0.527649	-0.392325	0.262317	1.38722
NEMVEDRAFT_v1g158066	A7RFW8	-2.54699	0.550273	-0.600279	0.548748	0.253707	-0.511349	-0.609429	-2.00125
NEMVEDRAFT_v1g158170	A7RG51	-1.23999	-0.176366	-0.555663	0.28043	0.0770711	-0.502548	-0.743909	-0.688484
NEMVEDRAFT_v1g158213	A7RG74	-0.972226	0.667425	0.291444	-0.109411	0.717334	0.705236	0.445435	-0.474476
NEMVEDRAFT_v1g158364	A7RGK3	-1.50736	0.272802	-0.101662	0.384053	0.469762	-0.471627	0.0966595	-1.38585
NEMVEDRAFT_v1g158601	A7RH51	-2.07122	-0.220653	-0.129562	0.969609	0.411749	-0.291828	0.245698	-2.16321
NEMVEDRAFT_v1g158690	A7RHD7	1.35696	-0.41738	0.485586	-0.871761	-0.779379	0.535364	-0.273445	1.50637
NEMVEDRAFT_v1g158806	A7RHT0	-1.08189	0.524179	0.00206435	-0.449832	0.0158426	0.721068	0.522396	-0.500698
NEMVEDRAFT_v1g158808	A7RHT1	-1.44045	-0.158457	-0.427303	0.37619	0.106591	-0.173918	-0.224609	-0.869403
NEMVEDRAFT_v1g158845	A7RHV6	-2.2026	0.365093	-1.0031	0.488075	-0.536374	-0.261159	-0.628189	-2.38508
NEMVEDRAFT_v1g158887	A7RHZ5	-0.861356	-0.423045	-0.259721	0.748751	0.076627	-1.06307	-0.177907	-1.40535
NEMVEDRAFT_v1g158977	A7RI59	-1.08184	-0.429984	0.182908	0.138359	0.18145	0.0696784	0.806435	-1.73187
NEMVEDRAFT_v1g159029	A7RIB7	-1.85945	0.00268846	0.498788	-0.0414455	0.362399	0.698758	1.36295	-1.06673
NEMVEDRAFT_v1g159064	A7RID2	1.07412	-0.774993	0.496915	0.0828331	-0.156592	-1.12279	0.432169	0.252064
NEMVEDRAFT_v1g159087	A7RIE7	1.44967	-0.655916	0.589759	0	0.226688	0	-0.213997	0
NEMVEDRAFT_v1g159278	A7RIU6	-1.34088	-0.328521	0.601929	0.126927	0.286687	0.101856	1.48091	-1.21478
NEMVEDRAFT_v1g159282	A7RIU9	-1.49023	0.27608	0.646849	0.793382	0.721915	-0.867884	1.27614	-1.00462
NEMVEDRAFT_v1g159302	A7RIW2	0.706303	0.0432031	0.413944	-0.893193	0.107743	0.963541	0.126531	1.01282
NEMVEDRAFT_v1g159424	A7RJ93	-1.1611	-1.30025	-0.30062	1.29515	0.121551	-1.66402	-0.0213986	-2.10267
NEMVEDRAFT_v1g159483	A7RJG4	-4.93283	4.18348	-1.16456	-4.07165	-6.0103	-3.37566	0.378216	4.44021
NEMVEDRAFT_v1g159607	A7RJW9	-1.47044	-0.432932	-0.50703	0.796742	-0.0871654	-1.2847	-0.309442	-1.4606
NEMVEDRAFT_v1g159647	A7RK01	-1.73348	-0.0150441	0.573746	0.247468	0.364112	0.211723	1.4582	-1.90607
NEMVEDRAFT_v1g159749	A7RKF2	-1.74039	0.580816	0.456095	-0.34628	0.684434	0.294736	1.06056	-0.771775
NEMVEDRAFT_v1g159788	A7RKK0	-1.08115	-0.0538025	-0.782924	-1.0861	-1.18564	1.74673	-0.207669	-0.623223
NEMVEDRAFT_v1g16015	A7SZ66	1.49565	0.447243	0.10259	-1.50611	-1.33797	1.209	-1.53767	1.96847
NEMVEDRAFT_v1g160160	A7RLJ0	-0.959891	0.0395626	-0.272408	0.0668606	-0.0908292	-0.0112403	0.0857315	-0.749385
NEMVEDRAFT_v1g160244	A7RLT1	0.871611	0.624655	0.591851	-1.09291	0.0642316	0.508672	0.0228856	1.48966
NEMVEDRAFT_v1g160394	A7RM49	-1.45687	-1.1274	-0.0120663	1.22253	0.194655	-0.94228	0.577152	-2.31301
NEMVEDRAFT_v1g160521	A7RMF9	-1.26967	-0.2466	-0.22736	0.762214	0.00917088	-0.506555	0.227403	-0.972978
NEMVEDRAFT_v1g160631	A7RMQ1	-0.652367	-0.396267	0	0.885175	0	-1.13115	0	-1.68587
NEMVEDRAFT_v1g160716	A7RMW0	1.28491	-1.06644	0.167244	-0.419582	-0.697801	0.0640544	-0.918267	0.293242
NEMVEDRAFT_v1g160748	A7RN02	-3.12202	0.715694	-0.937144	-0.302511	-0.0524629	0.926259	-0.926474	-1.46887
NEMVEDRAFT_v1g160768	A7RN12	-2.76833	0.119524	-0.439502	0.576001	-0.0662774	0.0631524	0.144476	-2.52001
NEMVEDRAFT_v1g160835	A7RN70	1.149	-0.355872	0.121252	0	-0.5935	0	-0.793224	0
NEMVEDRAFT_v1g160848	A7RN84	-1.43296	1.03037	-0.699495	-0.0875165	-0.896151	0.725094	-0.0223692	-1.31489
NEMVEDRAFT_v1g160897	A7RNE0	-1.03355	-0.462325	0.659849	0.735422	1.10811	-1.17779	0.879552	-0.966095
NEMVEDRAFT_v1g161176	A7RPA3	1.19848	-0.490179	0.985847	-1.61077	0.239937	0.625186	0.284797	2.59914
NEMVEDRAFT_v1g161193	A7RPB6	-0.821307	-0.49978	-0.0991227	0.818036	-0.123153	-0.936371	0.387951	-0.826435
NEMVEDRAFT_v1g161221	A7RPD7	-2.78847	0.548573	-0.670927	-2.41277	-0.219569	2.00375	-0.344409	-0.270591
NEMVEDRAFT_v1g161278	A7RPJ8	-1.4153	-0.556144	0.325017	-0.479528	0.0874453	0.816173	1.13441	-1.54062
NEMVEDRAFT_v1g161291	A7RPL0	1.75702	-1.92525	0.548306	-1.16156	0.22655	-0.446835	-0.786128	0.623792
NEMVEDRAFT_v1g161307	A7RPM5	-1.7348	-0.486844	0.340268	0.417556	0.0376665	0.140074	1.27416	-1.34728
NEMVEDRAFT_v1g161314	A7RPN3	0.846707	0.393563	0.134729	-0.77858	-0.872294	1.17345	-0.127787	0.889823
NEMVEDRAFT_v1g161329	A7RPQ2	-2.75719	-0.0915999	0.833669	1.20372	-0.275911	-0.653547	2.10765	-2.49811
NEMVEDRAFT_v1g161519	A7RQD1	-1.07571	-0.357916	-0.174621	0.857303	0.150146	-0.290001	0.0895755	-1.16224
NEMVEDRAFT_v1g161597	A7RQK1	-1.22957	-0.365487	-0.502945	0.778732	-0.26831	-0.315931	-0.0611134	-1.60703
NEMVEDRAFT_v1g161656	A7RQR6	-1.33879	0.24769	-0.0161704	0.59453	0.864629	-0.899251	-0.390793	-1.2244
NEMVEDRAFT_v1g161841	A7RRC9	-1.36592	0.260094	-0.0630967	0	0.19185	0	0.396104	0
NEMVEDRAFT_v1g161869	A7RRG2	-1.6415	-0.243048	-0.18013	0.723338	0.237487	-0.860572	0.235535	-1.23996
NEMVEDRAFT_v1g161954	A7RRM9	-0.970488	-0.263391	-0.302812	0.746282	0.268764	-0.432967	-0.324371	-1.35312
NEMVEDRAFT_v1g161973	A7RRP6	-0.644721	0.114746	-0.173344	0	0.229516	0	-0.23372	0
NEMVEDRAFT_v1g161976	A7RRP7	0.813563	-0.706711	0.433262	0.527065	0.0424905	-0.665087	0.335751	-0.522195
NEMVEDRAFT_v1g161999	A7RRR2	-0.946019	-0.214081	-0.261387	-0.522161	-0.74232	1.3061	0.485223	-1.34708
NEMVEDRAFT_v1g162063	A7RRW8	-1.84794	-0.237964	-0.302069	1.0095	0.250937	-0.245011	0.00436373	-1.64753
NEMVEDRAFT_v1g162204	A7RSE2	-1.42368	-0.234274	-0.600827	-0.257807	-0.263813	0.588783	-0.184699	-0.275746
NEMVEDRAFT_v1g162262	A7RSL2	-1.28088	-0.115786	-0.309861	0.523753	0.44727	-0.110911	-0.503755	-1.29553
NEMVEDRAFT_v1g162365	A7RT58	-1.15525	-0.161651	-0.0792423	0.86763	0.543666	-0.675079	-0.040648	-1.66799
NEMVEDRAFT_v1g162370	A7RT61	-1.6688	-0.0386953	0.29721	0.835974	0.967822	-1.21812	0.43081	-1.11382
NEMVEDRAFT_v1g162399	A7RT73	0.774363	-0.745263	0.545577	-0.431888	0.0710008	0.393048	0.553767	1.04857
NEMVEDRAFT_v1g162410	A7RT80	-2.13409	-0.580362	0.679562	0.27695	0.0848466	0.188849	1.77767	-1.78037
NEMVEDRAFT_v1g163012	A7RUX3	1.2894	-0.297811	1.64886	-0.42137	1.13259	-0.174794	1.31738	0.674437
NEMVEDRAFT_v1g163024	A7RUY5	-0.922169	0.348748	-0.109931	0	0.328409	0	-0.106445	0
NEMVEDRAFT_v1g163066	A7RV46	-1.81233	0.547665	-0.811123	0.431755	-0.126591	0.253081	-0.83583	-2.3723
NEMVEDRAFT_v1g163145	A7RVA9	-1.68396	-0.74265	0.107595	1.10291	0.548637	-1.0687	0.528779	-1.7621
NEMVEDRAFT_v1g163148	A7RVB0	-1.93743	-0.39168	0.178303	0.862489	0.882646	-1.77703	0.295337	-0.941028
NEMVEDRAFT_v1g163167	A7RVG5	1.99656	0.0658846	0.776962	-1.11918	-0.796394	1.46692	-1.83438	0.210916
NEMVEDRAFT_v1g163219	A7RVM1	-1.52312	0.111345	-0.267839	1.20364	0.202097	-0.735595	0.0193299	-2.58732
NEMVEDRAFT_v1g163275	A7RVR3	-1.06704	0.619883	-0.12212	0	0.625625	0	-0.407875	0
NEMVEDRAFT_v1g163386	A7RW41	1.9738	-0.730609	1.48034	-0.965428	-0.902424	-0.0106502	0.812872	2.19418
NEMVEDRAFT_v1g163440	A7RW70	-2.3377	-0.163136	-0.74621	0.719869	0.0772648	-0.0655977	-0.757971	-2.46677
NEMVEDRAFT_v1g163483	A7RWC9	-1.74439	-0.455217	-0.080453	0.764476	0.320078	-0.315365	0.325333	-2.62015
NEMVEDRAFT_v1g163554	A7RWL6	-1.14323	0.44211	-0.0993651	0.376297	0.395838	-0.0863112	0.0332029	-1.35053
NEMVEDRAFT_v1g163628	A7RWV1	-1.53489	0.408492	0.332026	0	1.04122	0	0.271937	0
NEMVEDRAFT_v1g163663	A7RX19	-0.831852	-0.568409	-0.0430663	0.893115	0.321381	-1.05334	0.18525	-1.34773
NEMVEDRAFT_v1g163675	A7RX26	-1.13577	-0.0208105	-0.885053	0.30902	-1.03476	-0.509941	-0.318762	-0.950582
NEMVEDRAFT_v1g163685	A7RX34	-1.00204	0.12836	-0.333939	0.323639	0.101526	0.260733	-0.148909	-1.15244
NEMVEDRAFT_v1g163817	A7RXD7	-1.66847	0.239121	0.692585	-0.254024	-0.167141	0.536435	1.80963	-0.731068
NEMVEDRAFT_v1g164009	A7RXZ5	-1.49718	0.105696	-0.0337672	0.812293	0.0209028	-0.301585	0.603047	-2.37869
NEMVEDRAFT_v1g164013	A7RXZ6	-1.98196	0.434698	-0.358712	0.299387	0.259765	-0.8142	-0.320438	-1.37603
NEMVEDRAFT_v1g164054	A7RY36	-1.13283	-0.399774	-0.0783716	0.439429	0.574139	-0.510195	-0.19669	-0.316436
NEMVEDRAFT_v1g164107	A7RY88	-1.68005	-0.0820792	-0.0943103	0.820551	-0.0726629	-0.602818	0.653837	-2.40664
NEMVEDRAFT_v1g164144	A7RYC0	-1.3716	-0.192713	0.0714118	0.764273	0.409169	-0.795173	0.532982	-1.16208
NEMVEDRAFT_v1g164152	A7RYC7	-1.04579	0.275369	0.402744	0	1.19653	0	-0.00153523	0
NEMVEDRAFT_v1g164174	A7RYE6	-1.70714	-0.423234	-1.71999	0.275386	-1.28198	-0.583767	-1.88224	-0.944559
NEMVEDRAFT_v1g164325	A7RYX2	1.00479	-0.140379	1.28775	-0.790817	1.27634	1.08961	0.652884	-0.0411345
NEMVEDRAFT_v1g164341	A7RYZ2	-2.5787	-0.684252	-0.229187	0.709708	-0.0530598	-0.0366917	0.531952	-2.26385
NEMVEDRAFT_v1g164655	A7RZV2	-1.67812	-0.475102	0.410405	1.1201	0.740279	-1.79781	0.963867	-2.18689
NEMVEDRAFT_v1g164727	A7S002	-1.14108	-0.262751	0.753473	0.793229	1.55301	-1.42496	0.332633	-0.749996
NEMVEDRAFT_v1g164762	A7S024	-1.32978	-0.121435	0.584198	0.770628	0.945687	-0.614543	0.962541	-1.03943
NEMVEDRAFT_v1g164783	A7S040	-1.54637	0.194065	0.263976	-0.661482	-0.219498	1.25602	1.21337	-0.153315
NEMVEDRAFT_v1g164994	A7S0N6	-0.620565	-0.340345	-0.52354	0.693121	-0.0932112	-1.49329	-0.649589	-0.918564
NEMVEDRAFT_v1g165121	A7S126	1.7964	-0.65369	0.81417	-1.15544	-0.973475	0.822249	-0.403611	1.42777
NEMVEDRAFT_v1g165261	A7S1E3	-2.67452	-1.18597	-0.333399	1.91937	-0.143639	-2.69526	0.429643	-2.62885
NEMVEDRAFT_v1g165358	A7S1L8	0.607821	0.0826598	0.475148	-0.395906	0.368331	0.713628	0.217353	0.666348
NEMVEDRAFT_v1g165424	A7S1X5	-2.38289	0.412476	-1.79609	0.38143	-1.0519	0.221631	-1.8503	-1.37562
NEMVEDRAFT_v1g165579	A7S2C2	-1.72899	1.18201	-0.914398	-0.67548	-0.0354444	0.706133	-1.4782	-0.267954
NEMVEDRAFT_v1g165676	A7S2K4	-0.900106	0.3572	-0.336664	-0.625827	0.170897	0.767047	-0.515121	-0.0293432
NEMVEDRAFT_v1g165764	A7S2W2	-1.38746	-0.426082	-0.101159	0.477405	0.645324	-0.419573	-0.18541	-1.4879
NEMVEDRAFT_v1g165907	A7S396	1.49282	-0.568332	0.590433	-0.138961	-0.30398	-0.266502	-0.681104	0.582503
NEMVEDRAFT_v1g165928	A7S3A7	-2.35794	0.0208282	-0.334647	0.630077	0.471897	-0.478477	-0.259114	-1.29353
NEMVEDRAFT_v1g165958	A7S3C8	-1.19563	0.577051	0.357156	-0.277609	-0.0425377	0.603107	1.1857	-0.231416
NEMVEDRAFT_v1g166010	A7S3H9	-0.776853	0.0249103	-0.667931	0	-0.0127994	0	-1.10117	0
NEMVEDRAFT_v1g166027	A7S3J5	0.782799	-0.440195	0.106157	-0.859555	-0.412307	0.282412	-0.041793	1.70365
NEMVEDRAFT_v1g166119	A7S3Y9	-1.36613	0.533563	0.0185532	0.34449	0.526913	-0.202737	0.248492	-0.825891
NEMVEDRAFT_v1g166138	A7S400	-2.65071	-1.64268	-0.511764	1.5137	0.517093	-3.55433	-0.852395	-2.64282
NEMVEDRAFT_v1g166198	A7S438	-1.32282	-0.175087	0.176657	1.00421	0.619537	-0.51826	0.522996	-2.03252
NEMVEDRAFT_v1g166263	A7S4A9	1.02319	0.193947	-0.0326648	-1.0698	-0.600292	1.3975	-0.957858	1.14629
NEMVEDRAFT_v1g166265	A7S4B0	-1.14056	-0.339487	0.234339	0.759783	0.851675	-1.01417	0.290046	-0.841482
NEMVEDRAFT_v1g166478	A7S4W9	-1.02161	-0.0176204	-0.0892157	0.134189	0.338123	0.184789	0.117819	-1.5675
NEMVEDRAFT_v1g166542	A7S523	-2.38161	0.205712	-0.439024	0.197004	0.0260745	0.0324504	0.0449242	-1.76654
NEMVEDRAFT_v1g166761	A7S5R5	-2.72605	-0.489356	-1.11083	0.566144	-0.204084	-0.17771	-1.23692	-1.74401
NEMVEDRAFT_v1g166823	A7S5W8	-0.719432	-0.0063272	-0.0679756	0	-0.221914	0	0.413014	0
NEMVEDRAFT_v1g166963	A7S693	-1.36584	1.7275	-0.701655	-1.06756	-0.770039	1.45504	-0.0722257	0.330681
NEMVEDRAFT_v1g166966	A7S695	-1.37018	-0.442827	-0.46604	0.136529	0.331781	0.338593	-0.794298	-1.94141
NEMVEDRAFT_v1g167052	A7S6G4	1.08609	-0.118512	1.16663	-0.097778	1.05545	-0.597745	0.098941	0.87925
NEMVEDRAFT_v1g167124	A7S6P4	-1.36069	0.651716	0.0926846	0.10108	0.175895	0.071011	0.70942	-0.613743
NEMVEDRAFT_v1g167288	A7S758	-6.38391	1.05892	-1.32314	-1.489	-2.04958	2.5163	-0.107756	1.51808
NEMVEDRAFT_v1g167330	A7S7B0	-1.44515	-0.425246	-0.0179472	0.88794	0.558206	-0.965891	0.182897	-2.07726
NEMVEDRAFT_v1g167335	A7S7D1	-1.9227	0.774587	0.983872	0.187653	1.78228	0.259559	0.965607	-0.681115
NEMVEDRAFT_v1g167381	A7S7H5	-1.07244	-0.514644	-0.343791	1.13983	-0.111648	-1.40427	0.0852157	-1.74113
NEMVEDRAFT_v1g167409	A7S7K1	0.978437	-0.022959	0.218749	-0.849912	-0.738534	0.606605	-0.311644	1.05743
NEMVEDRAFT_v1g167688	A7S8F4	-1.50809	0.08515	0.959957	0.0916646	1.05305	-1.20719	1.5174	-0.740263
NEMVEDRAFT_v1g167736	A7S8I2	-1.80504	-0.620211	0.431641	0.927241	0.775843	-0.41341	0.97567	-2.05282
NEMVEDRAFT_v1g167737	A7S8I3	-1.34108	-0.039083	0.659126	-1.04227	0.987535	1.32875	1.02245	0.118534
NEMVEDRAFT_v1g167750	A7S8I4	-1.18941	0.0230897	-0.0158461	0.687496	0.403711	-1.0991	0.247691	-0.842286
NEMVEDRAFT_v1g167825	A7S8R6	-0.828268	0.16671	0.270971	0	0.866757	0	0.0959778	0
NEMVEDRAFT_v1g167864	A7S8W4	-1.92924	0.811003	0.0718114	-0.0364925	0.559434	-0.0344412	0.434163	-2.12046
NEMVEDRAFT_v1g167874	A7S8Y2	-1.64497	-0.478051	-0.292033	0.515481	0.347425	-0.392463	-0.161929	-1.8496
NEMVEDRAFT_v1g167919	A7S938	1.58405	-0.488944	0.509279	-1.13369	-1.49495	0.729767	-0.552209	2.07635
NEMVEDRAFT_v1g167977	A7S9E5	-1.6651	-0.31757	0.100621	1.15188	0.447826	-0.893308	0.590874	-2.57229
NEMVEDRAFT_v1g168038	A7S9K8	-7.12538	2.97079	1.61734	-1.26356	2.01814	0.0600675	2.30388	0.39153
NEMVEDRAFT_v1g168072	A7S9N3	-0.796916	-0.0693406	-0.213171	0.215232	0.24517	0.0376489	-0.145692	-0.632063
NEMVEDRAFT_v1g168196	A7SA32	-2.5384	-0.3154	-0.37768	0.298864	0.118709	0.0434347	0.097227	-1.39148
NEMVEDRAFT_v1g168297	A7SAB6	-1.6354	-0.148707	-1.21145	-1.16202	-0.905252	0.810479	-1.02853	-0.635244
NEMVEDRAFT_v1g168328	A7SAE7	-1.41686	0.0826015	-0.495821	0	-0.363196	0	0.0445318	0
NEMVEDRAFT_v1g168440	A7SAN9	-1.09817	-0.47602	-0.328937	0.506067	-0.213092	-1.2173	0.213396	-0.799716
NEMVEDRAFT_v1g168498	A7SAY4	-1.8185	-0.648957	0.416205	0.791731	0.710464	-0.97416	1.01811	-0.589001
NEMVEDRAFT_v1g168557	A7SB73	-1.68162	-0.507195	-0.878254	0.319047	-0.83318	-0.557916	-0.194797	-1.4085
NEMVEDRAFT_v1g168575	A7SBA3	0.632501	-0.575471	0	0	0	0	0	0
NEMVEDRAFT_v1g168601	A7SBC9	-1.21583	0.531478	-0.8025	-0.15439	-0.765522	0.38635	-0.309049	-0.635309
NEMVEDRAFT_v1g168735	A7SBT1	1.04294	-0.326242	0.61448	-1.41004	-0.272635	0.90621	0.568941	0.932716
NEMVEDRAFT_v1g168783	A7SBY2	-2.78739	-1.3524	-0.811389	2.11086	-0.129883	-2.93185	-0.510608	-2.0383
NEMVEDRAFT_v1g168885	A7SCA3	1.67951	-0.89534	0.866715	-0.932755	-0.244399	0.0260308	0.243042	1.85519
NEMVEDRAFT_v1g168908	A7SCC8	1.03172	-0.784517	0.240574	0	-0.0459984	0	-0.297269	0
NEMVEDRAFT_v1g169033	A7SCP3	1.40362	-0.857394	1.76909	0.43849	0.340715	-0.781561	1.95765	0.362467
NEMVEDRAFT_v1g169110	A7SCY1	-0.832476	1.07396	-0.426273	-0.911448	0.0554882	1.0153	-0.670781	0.275794
NEMVEDRAFT_v1g169166	A7SD44	-1.31519	-0.385635	0.0503677	-0.587243	-0.671645	0.857769	1.02612	0.179068
NEMVEDRAFT_v1g169264	A7SDD0	-1.61306	0.666883	0.67153	0.148859	1.15126	0.628362	1.02146	-0.0673801
NEMVEDRAFT_v1g169317	A7SDH3	1.08223	-1.96927	-0.0243182	0.37745	-0.291578	-1.57862	-0.823735	-0.169606
NEMVEDRAFT_v1g169407	A7SDU3	-1.56918	-0.446131	0.41567	0.3297	1.06982	-0.0751331	0.534591	-0.921066
NEMVEDRAFT_v1g169651	A7SEE9	-0.942949	-0.928561	0.0702358	0.750126	0.685258	-0.923005	-0.0940425	-0.659149
NEMVEDRAFT_v1g169723	A7SEN2	0.667541	-0.815844	0.364584	0.0991575	0.382906	-0.195446	0.0187044	0.155211
NEMVEDRAFT_v1g169881	A7SF23	-1.35237	0.77496	-0.959598	-1.80108	-0.904428	1.69182	-0.588015	0.61492
NEMVEDRAFT_v1g16994	A7SI57	0.775595	-0.517192	-0.116679	-0.910913	-0.187845	1.00548	-0.876213	2.05782
NEMVEDRAFT_v1g169978	A7SFC3	-1.80845	0.63471	-0.804328	0.11256	-0.873327	0.239958	-0.0322476	-1.21349
NEMVEDRAFT_v1g170004	A7SFE8	-1.6437	-0.760868	0.167718	1.25875	0.416655	-1.64638	0.774503	-2.55603
NEMVEDRAFT_v1g170108	A7SFR2	-2.47893	0.386085	0.127599	0.731058	1.34188	-0.633205	-0.872638	-1.39205
NEMVEDRAFT_v1g170139	A7SFU6	-1.59518	0.304304	0.529044	-0.0116808	0.544936	-1.27714	1.27981	-0.31576
NEMVEDRAFT_v1g170150	A7SFV8	-3.04625	-0.293455	0.24183	0.798969	-0.0268788	-2.64924	1.28496	-1.33541
NEMVEDRAFT_v1g170236	A7SG28	-1.41166	-0.66635	-0.256955	-0.186694	0.370138	1.16261	-0.188157	-1.64155
NEMVEDRAFT_v1g170348	A7SGD1	-1.64318	0.0582348	-0.932137	0.174924	-0.285404	-0.195031	-0.869056	-0.654903
NEMVEDRAFT_v1g170437	A7SGM6	-1.6763	-1.27962	-0.506839	0.951	-0.700328	-2.5271	0.356377	-1.84617
NEMVEDRAFT_v1g170503	A7SGU4	-1.57961	-0.148556	-0.359652	1.1485	-0.192957	-2.1942	0.220009	-1.51065
NEMVEDRAFT_v1g170515	A7SGV3	1.40438	-1.26999	0.583641	-1.52471	-0.221313	0.434098	-0.189508	2.35048
NEMVEDRAFT_v1g170524	A7SGX1	-3.81431	-1.27618	3.84648	2.60282	4.67048	-3.56269	4.08116	-3.42591
NEMVEDRAFT_v1g170618	A7SH68	-1.47868	-0.080787	-0.155706	0.721774	-0.0681528	-0.474776	0.503892	-1.34803
NEMVEDRAFT_v1g170650	A7SHC3	0.824084	0.125616	0.865523	-0.0619126	0.22313	-0.77787	0.762431	0.529478
NEMVEDRAFT_v1g170685	A7SHG4	-1.5488	-0.278586	-0.352424	0.551273	0.363818	-0.798692	-0.348517	-1.00976
NEMVEDRAFT_v1g170737	A7SHN9	-1.19997	0.361257	-0.487284	0.550281	-0.181784	-0.0459916	-0.20267	-1.02099
NEMVEDRAFT_v1g170763	A7SHS9	-2.63991	-0.445678	1.11903	1.49188	1.72896	-2.42176	1.48349	-2.24974
NEMVEDRAFT_v1g170908	A7SI79	-1.02152	0.903418	0.141649	-0.38383	0.673104	1.06395	0.14562	-0.974044
NEMVEDRAFT_v1g170937	A7SIC3	-2.01044	-0.361405	0.771297	0.280289	0.470129	-0.110082	1.74375	-1.74811
NEMVEDRAFT_v1g170954	A7SIH5	0.666129	-0.261835	-0.246995	0	-1.01723	0	-0.192607	0
NEMVEDRAFT_v1g170966	A7SII4	-1.88311	-0.766353	-0.879592	0.933867	0.158557	-1.56745	-1.60981	-0.718263
NEMVEDRAFT_v1g171012	A7SIS1	-1.42723	-0.946683	-0.811334	0.952694	-0.662413	-1.88821	-0.282136	-1.84212
NEMVEDRAFT_v1g17103	A7SKB5	-0.927046	0.235933	0.00901305	0.512665	0.486771	-1.02818	0.133061	-1.4121
NEMVEDRAFT_v1g171050	A7SIW3	1.25378	-0.577311	1.35775	0	0.891639	0	0.770988	0
NEMVEDRAFT_v1g171103	A7SJ46	-1.23774	0.0147452	0.166935	0.303057	0.360852	-0.611858	0.575047	-1.62767
NEMVEDRAFT_v1g17113	A7SKB2	-4.12385	1.09644	-0.461177	0.390788	0.391551	-4.12736	-0.317167	-0.854044
NEMVEDRAFT_v1g171143	A7SJ77	-1.37716	-0.665088	-0.445038	0.828873	0.256561	-0.0816438	-0.476332	-1.98231
NEMVEDRAFT_v1g171246	A7SJH7	-0.826294	0.114251	-0.180979	0.534898	-0.0326951	-0.701991	0.170371	-0.795175
NEMVEDRAFT_v1g171280	A7SJL0	-2.10633	0.135008	-0.670711	0.293081	-0.0332608	-0.475314	-0.465234	-1.73035
NEMVEDRAFT_v1g171297	A7SJL6	-1.60622	-1.23392	0.0798501	0.426338	1.084	-1.30156	-0.545237	-0.642849
NEMVEDRAFT_v1g171300	A7SJL7	0.681401	-0.101663	0	0	0	0	0	0
NEMVEDRAFT_v1g171313	A7SJM6	-0.724511	-0.490204	-0.171038	0.644033	-0.379375	-1.02536	0.37315	-0.335115
NEMVEDRAFT_v1g171328	A7SJN9	-1.53844	0.80938	-0.306733	0.027053	-0.108715	-0.688403	0.102038	-0.717964
NEMVEDRAFT_v1g171543	A7SKC3	-1.50046	-0.30057	-0.00802652	0.533763	0.872718	0.0931902	-0.347818	-1.13755
NEMVEDRAFT_v1g171629	A7SKM1	-1.24065	-0.217729	-0.234707	0.353892	0.198454	-0.415562	0.0501352	-0.904063
NEMVEDRAFT_v1g171651	A7SKP0	-1.44108	0.472195	1.25405	0.711441	1.37918	-0.492036	1.87796	-1.4295
NEMVEDRAFT_v1g171792	A7SL56	0.66394	-0.145563	0.061996	0	-0.188179	0	-0.583407	0
NEMVEDRAFT_v1g171857	A7SLG1	-1.49894	0.798187	0.368017	0.612685	0.6589	-0.087457	0.883579	-2.73586
NEMVEDRAFT_v1g171912	A7SLM1	-1.26509	0.653176	0.800309	0.565386	1.50892	-0.032296	0.736841	-1.33363
NEMVEDRAFT_v1g171933	A7SLP4	-0.632143	-0.159687	-0.467736	0	-0.304024	0	-0.255116	0
NEMVEDRAFT_v1g171940	A7SLQ1	0.708489	-0.802227	0.534382	-0.249796	0.0914836	-0.86099	0.502896	0.923704
NEMVEDRAFT_v1g172156	A7SMM5	0.690327	0.37267	-0.125735	-0.543687	-0.872416	0.72958	-0.28564	0.638929
NEMVEDRAFT_v1g172167	A7SMN3	-1.58671	0.569538	-0.375552	0.563298	0.291016	0.233493	-0.275494	-1.34981
NEMVEDRAFT_v1g172254	A7SMW7	-2.1824	-0.23143	-0.220413	1.10111	0.22879	-1.17759	0.262242	-2.10521
NEMVEDRAFT_v1g172491	A7SNH7	-1.10514	-0.055369	0.391253	1.01527	0.684833	-0.424954	0.774222	-1.51917
NEMVEDRAFT_v1g172583	A7SNR4	-1.19974	0.00704899	0.604318	0.394635	1.34092	-0.196981	0.456579	-0.732676
NEMVEDRAFT_v1g17260	A7SX41	2.50049	-2.23873	0.644302	-4.37195	-0.510394	4.66831	-0.162437	0
NEMVEDRAFT_v1g172658	A7SNX4	-1.33532	0.320614	-0.554669	0.187578	-0.0524585	0.687323	-0.354698	-1.61997
NEMVEDRAFT_v1g172704	A7SP30	-1.3297	-0.649954	0.0843634	0.963615	0.870224	-1.31136	-0.0581658	-1.3049
NEMVEDRAFT_v1g172762	A7SP79	0.99861	-1.23015	0.817357	0.0141932	0.171882	-1.01873	0.471982	0.783667
NEMVEDRAFT_v1g172894	A7SPL2	-1.20464	-0.00856011	0.377619	0.614708	0.979215	-1.22338	0.445141	-0.537133
NEMVEDRAFT_v1g172905	A7SPM2	-1.33596	0.0716232	-0.0341082	0.776135	0.613898	-0.492756	0.00624087	-1.2878
NEMVEDRAFT_v1g17292	A7SPE6	-2.39281	0.19715	1.23732	0	1.13916	0	2.16059	0
NEMVEDRAFT_v1g173010	A7SPW8	0.915056	-0.566481	1.02911	-0.26011	0.187938	-0.670321	0.992711	0.534161
NEMVEDRAFT_v1g173117	A7SQ73	-0.805528	0.339504	-0.31531	-0.166339	-0.201804	0.377104	-0.014501	0.680851
NEMVEDRAFT_v1g173120	A7SQ75	-0.935395	-0.847828	-0.236263	1.1411	0.0499526	-1.2886	0.0761563	-1.9817
NEMVEDRAFT_v1g173194	A7SQG6	-1.33507	-0.534698	-0.786957	0.550632	-1.29585	-0.304991	0.0614709	-1.92143
NEMVEDRAFT_v1g173232	A7SQL2	-1.91712	-0.0877398	-0.0926905	0.277565	-0.082052	0.620859	0.705998	-1.35699
NEMVEDRAFT_v1g173306	A7SQT9	-2.92849	0.790463	-0.700205	-0.371429	-0.380537	0.837743	-0.0428574	-1.77368
NEMVEDRAFT_v1g173313	A7SQU3	-0.613237	0.692992	-0.21951	-0.753119	-0.137873	1.48454	-0.0113252	-0.179677
NEMVEDRAFT_v1g173328	A7SQV7	-1.03957	-0.0920341	-0.281985	0.344667	-0.000886738	-0.443663	0.0497171	-0.589759
NEMVEDRAFT_v1g173335	A7SQW1	0.96846	-1.28286	0.343656	0.179975	-0.0635235	-0.405028	0.0545722	0.438641
NEMVEDRAFT_v1g173380	A7SR35	-1.0866	-0.477836	-0.773952	0.844668	-0.19662	-0.811149	-0.78947	-1.25178
NEMVEDRAFT_v1g173450	A7SR92	-0.668928	0.205217	-0.154449	0	0.136279	0	-0.117407	0
NEMVEDRAFT_v1g173515	A7SRI6	-1.88564	-0.280314	-0.373591	0.823454	-0.00401239	-0.222012	0.144302	-1.74117
NEMVEDRAFT_v1g173586	A7SRP2	-1.24961	-0.639724	-0.215953	0.824786	0.541892	-1.04266	-0.41646	-1.00462
NEMVEDRAFT_v1g173595	A7SRP9	-1.2959	-0.233207	-0.298608	0.519632	-0.48611	-0.037544	0.491346	-1.12719
NEMVEDRAFT_v1g173734	A7SS50	-2.8591	-0.647818	-1.11909	1.22664	-0.382281	-1.96225	-0.907742	-2.49771
NEMVEDRAFT_v1g173851	A7SSH6	-1.33857	0.274736	-1.21158	0.285383	-1.44952	0.364634	-0.543865	-1.47649
NEMVEDRAFT_v1g174086	A7STA4	-1.7	-1.09382	1.14466	1.89649	1.52106	-2.15848	1.61769	-3.72927
NEMVEDRAFT_v1g174147	A7STF3	1.9664	-1.97183	0.584589	0.848916	0.0370523	-1.8627	-0.889591	-0.188857
NEMVEDRAFT_v1g174161	A7STG9	-2.86289	-0.631245	-0.422498	1.17875	0.36504	-0.572798	-0.230887	-3.51287
NEMVEDRAFT_v1g174335	A7SU16	-0.849353	-0.263501	-0.308502	0.571935	-0.223834	-0.562	0.094905	-1.17936
NEMVEDRAFT_v1g174448	A7SUG5	-1.61185	0.349148	-0.5223	0.293931	-0.28881	-0.171029	-0.0270437	-0.720187
NEMVEDRAFT_v1g174598	A7SUT5	-0.752481	-1.03802	0.222322	1.79396	0.247382	-2.84977	0.657468	-2.83255
NEMVEDRAFT_v1g174800	A7SVJ4	-1.54163	-0.576984	0.484102	1.18083	1.34797	-1.32479	0.319416	-1.96437
NEMVEDRAFT_v1g174806	A7SVK0	-1.68476	0.540742	-0.552298	0	-0.331099	0	-0.127807	0
NEMVEDRAFT_v1g174976	A7SW84	-0.67771	0.207962	0.129491	0.0422437	0.623806	-0.140243	0.0472933	-1.4598
NEMVEDRAFT_v1g174984	A7SW85	-1.23021	-0.670073	0.399431	0.551534	0.587605	-0.360307	0.927441	-3.77966
NEMVEDRAFT_v1g175127	A7SWU1	-1.07682	-0.168291	-0.538756	0.545788	-0.17648	-0.131994	-0.283383	-1.06799
NEMVEDRAFT_v1g175140	A7SWV9	-1.07707	0.842179	0.402205	0.0153187	1.04545	0.24645	0.223454	-0.887465
NEMVEDRAFT_v1g175297	A7SXD8	0.911816	0.0279689	-0.252401	-0.645112	-0.671644	1.17111	-0.714567	-0.301137
NEMVEDRAFT_v1g175500	A7SY83	-2.62911	-1.11061	-0.653856	1.63706	0.111517	-1.78724	-0.460874	-3.26298
NEMVEDRAFT_v1g175837	A7SZR7	-0.736144	-0.171741	-0.426209	0	0.197929	0	-0.736077	0
NEMVEDRAFT_v1g175862	A7SZU7	-0.900715	0.390708	-0.380033	0	-0.173999	0	-0.0316664	0
NEMVEDRAFT_v1g175874	A7SZW1	-2.96677	0.407239	0.824329	-1.58032	1.4384	1.99643	1.2172	-1.53439
NEMVEDRAFT_v1g175950	A7T0C0	1.23947	0.21368	0.561751	0	-0.163888	0	-0.341546	0
NEMVEDRAFT_v1g176105	A7T136	-2.0742	-0.111139	0.330719	1.12302	0.914997	-0.33499	0.683652	-2.92074
NEMVEDRAFT_v1g176107	A7T138	-0.62916	0.0518554	0	0.469076	0	0.0212196	0	-1.27166
NEMVEDRAFT_v1g176125	A7T148	-2.52546	-0.849806	1.2801	0.297104	0.18609	0.476796	2.53043	-2.36793
NEMVEDRAFT_v1g1763	A7S5S4	-5.2988	-0.538368	2.65331	2.3802	3.20715	-3.17617	3.2406	-5.76933
NEMVEDRAFT_v1g176307	A7T1V1	1.24973	-0.657493	1.11042	-0.722309	0.273912	0.507604	0.630821	1.07317
NEMVEDRAFT_v1g176499	A7T3T4	-2.67336	-2.61864	0.101559	1.34935	0.691044	-2.31901	0.535136	-1.30917
NEMVEDRAFT_v1g177083	A7RFA1	-1.01826	-0.0323295	0.122474	0	0.515289	0	0.343577	0
NEMVEDRAFT_v1g177129	A7RFC7	-0.749208	0.488077	0.113146	0	-0.0810373	0	0.734323	0
NEMVEDRAFT_v1g177208	A7RFL9	-1.28947	-0.471964	0.0969432	0.895071	0.644247	-1.28298	0.187029	-0.87368
NEMVEDRAFT_v1g177213	A7RFM3	-2.99969	-0.102952	1.55161	1.13032	1.7504	-2.31004	2.32456	-1.22173
NEMVEDRAFT_v1g177240	A7RFQ0	-1.04667	0.740436	0.128199	-1.14007	-0.0742845	1.10773	0.710309	0.478251
NEMVEDRAFT_v1g1773	A7T8E9	-6.35727	-7.44401	-1.50289	1.86668	-0.774924	-4.60895	-1.13512	-1.35904
NEMVEDRAFT_v1g177334	A7RFX6	-0.936213	-0.779781	0.00669696	0.599807	0.665757	-0.97857	-0.12942	-0.675233
NEMVEDRAFT_v1g177378	A7RG04	-0.707741	0.175026	0	0	0	0	0	0
NEMVEDRAFT_v1g177823	A7RH35	-1.26241	-0.0182221	0.143278	0.356427	0.545996	-0.261086	0.458579	-0.602134
NEMVEDRAFT_v1g178088	A7RHV4	-1.04728	-0.305471	-0.168612	0.837402	0.391287	-0.545881	-0.0837743	-1.61231
NEMVEDRAFT_v1g178189	A7RI32	-2.12272	-0.485425	-0.45835	1.29902	0.114093	-0.882043	-0.14115	-2.34292
NEMVEDRAFT_v1g178268	A7RIA0	0.959223	-0.409196	0.53358	-0.0683274	0.482878	0.0573069	-0.191313	0.673243
NEMVEDRAFT_v1g178355	A7RIF9	-1.68181	-0.19283	-0.627656	0.236796	-1.00571	-0.498451	0.300543	-0.853272
NEMVEDRAFT_v1g178461	A7RIN5	-2.19814	-1.66061	-0.043995	1.52188	0.940243	-2.35627	-0.306773	-2.27145
NEMVEDRAFT_v1g178884	A7RJZ7	-1.85798	0.371796	-0.750012	0.171916	0.0338267	0.339107	-0.830568	-2.72219
NEMVEDRAFT_v1g179157	A7RL04	-2.54469	-3.30618	1.26666	2.21581	1.61201	-3.01222	1.95111	-1.89857
NEMVEDRAFT_v1g179171	A7RL09	-2.24014	0.412248	-0.983815	-0.175378	-0.261869	-0.651261	-1.01071	-1.47626
NEMVEDRAFT_v1g179227	A7RL62	1.02506	-0.146702	0.0317651	0	0.0324558	0	-1.25046	0
NEMVEDRAFT_v1g179325	A7RLD5	0.938713	0.164122	0.662365	-1.01672	-0.452636	0.322629	0.550761	1.76103
NEMVEDRAFT_v1g179399	A7RLI7	-1.75453	-0.752845	-0.546112	0.160025	-0.353075	-0.614207	0.0489119	-1.59262
NEMVEDRAFT_v1g179413	A7RLJ7	1.34312	-0.171418	0.334427	-0.920338	-0.303935	1.05794	-0.503616	0.848289
NEMVEDRAFT_v1g179528	A7RLV7	-2.67929	-0.525458	-0.949374	1.38181	-0.342591	-1.09537	-0.573965	-3.09511
NEMVEDRAFT_v1g179665	A7RM78	-1.52855	0.255034	-0.228129	-0.553527	-0.0629549	0.74782	0.222769	-1.45891
NEMVEDRAFT_v1g179696	A7RMA1	-2.69745	0.430855	-0.530075	1.04655	0.578974	-0.736736	-1.09091	-2.59945
NEMVEDRAFT_v1g179729	A7RMC7	-1.14726	-0.202202	0.0524832	0.678551	0.462021	-0.598845	0.368644	-0.996157
NEMVEDRAFT_v1g180130	A7RNC7	-1.63467	-0.168087	-0.961893	0.656566	-0.42174	-0.264695	-0.723116	-1.53547
NEMVEDRAFT_v1g180149	A7RNE6	-0.827525	0.369953	0	0.364566	0	-0.802594	0	-0.413852
NEMVEDRAFT_v1g180663	A7RPZ3	2.52168	-4.793	3.27513	-1.73356	0.390568	-0.356758	1.64363	2.87332
NEMVEDRAFT_v1g180812	A7RQH8	-1.50792	0.212029	0.0488897	-1.87145	0.610613	1.89767	0.106806	0.0182358
NEMVEDRAFT_v1g180983	A7RR26	-2.1017	-0.183143	0.115832	1.05591	0.487875	-0.162479	0.683767	-3.04663
NEMVEDRAFT_v1g181066	A7RRA3	-1.26214	0.257023	-0.173796	0	0.436684	0	-0.168036	0
NEMVEDRAFT_v1g181320	A7RRY1	-1.25327	-0.0449637	-0.128214	0	0.4816	0	-0.106569	0
NEMVEDRAFT_v1g181421	A7RSB4	-1.28712	-0.257991	0.423133	1.05489	0.93521	-1.47159	0.582196	-1.36632
NEMVEDRAFT_v1g181495	A7RSL1	1.43742	-1.43681	1.43327	-0.335088	0.0777135	-1.21786	1.37151	1.39259
NEMVEDRAFT_v1g181733	A7RTH5	-2.22685	-1.58507	0.455599	-1.08956	0.447734	-0.825834	1.20718	1.98579
NEMVEDRAFT_v1g181888	A7RTW5	-2.13494	-1.0059	-0.735611	1.42863	0.00849937	-1.16359	-0.60763	-1.9964
NEMVEDRAFT_v1g181936	A7RTZ9	-0.645262	-0.0166142	0	0	0	0	0	0
NEMVEDRAFT_v1g182	A7RGC6	0.751322	-1.39095	0.788885	0.797303	0.741081	-2.87931	0.344269	-0.943362
NEMVEDRAFT_v1g182009	A7RU51	-2.03306	-0.944537	0.842835	1.43739	2.09024	-1.84928	-0.379652	-1.91435
NEMVEDRAFT_v1g182068	A7RUD3	-1.31641	-0.442885	0.266098	0.987161	0.383613	-0.531199	0.906515	-1.35758
NEMVEDRAFT_v1g182082	A7RUF4	-1.7475	-1.15687	0.139663	1.31234	0.829847	-1.12319	0.297078	-2.07039
NEMVEDRAFT_v1g182116	A7RUJ2	1.63507	-0.713596	0.822645	-2.2331	-1.08566	0.62996	0.151804	3.23222
NEMVEDRAFT_v1g182128	A7RUK5	-1.65039	-0.285506	0.570575	0.269461	1.67516	-0.44405	-0.233671	-0.728253
NEMVEDRAFT_v1g182256	A7RUX9	-1.63156	0.298714	-0.93646	0.637989	-0.709307	0.0960241	-0.402729	-2.95214
NEMVEDRAFT_v1g182272	A7RV02	-1.6122	0.270452	-0.0388024	0.241881	-0.568455	0.49518	0.967638	-0.936779
NEMVEDRAFT_v1g182282	A7RV06	-1.68122	-0.098136	-0.411976	0.674429	0.182639	-0.0706431	-0.191696	-1.79563
NEMVEDRAFT_v1g182326	A7RV73	-0.804583	-0.333572	-0.13611	0	0.465917	0	-0.328077	0
NEMVEDRAFT_v1g182461	A7RVM5	-1.71906	-0.132346	-0.175166	-0.0894862	0.211486	1.42697	0.292218	-1.61269
NEMVEDRAFT_v1g182641	A7RW51	-0.752522	0.0211488	-0.0469247	0	0.483179	0	-0.124249	0
NEMVEDRAFT_v1g182669	A7RW67	-1.50137	-0.632379	-0.209214	0.96848	0.650736	-0.6448	-0.503739	-1.50047
NEMVEDRAFT_v1g182684	A7RW80	-0.952818	-0.0049622	0	0	0	0	0	0
NEMVEDRAFT_v1g182742	A7RWE6	0.973078	-0.529172	0.878807	-0.724452	1.02676	0.409895	0.0666634	1.19066
NEMVEDRAFT_v1g182839	A7RWT5	-1.63091	-1.31465	0.0219818	1.70628	-0.0292856	-3.03049	0.817159	-2.90544
NEMVEDRAFT_v1g182924	A7RX40	0.772813	-0.245965	0	0	0	0	0	0
NEMVEDRAFT_v1g183084	A7RXH3	-0.868842	-0.523793	-0.167262	0.626866	0.300288	-0.525323	-0.124632	-1.52591
NEMVEDRAFT_v1g183101	A7RXI6	-2.49743	-0.217998	1.23565	0.346409	2.00637	-0.883339	1.42438	-0.566907
NEMVEDRAFT_v1g183365	A7RYA9	-3.02094	2.61914	-0.352904	-0.994136	0.137747	0.330909	-0.126835	-0.0853965
NEMVEDRAFT_v1g18367	A7SYT9	2.66776	-1.56184	2.32294	-2.08968	-0.372685	1.22293	0.890278	2.87566
NEMVEDRAFT_v1g183837	A7RZQ9	-1.21352	0.0308024	-0.399964	0	0.489349	0	-0.92213	0
NEMVEDRAFT_v1g183874	A7RZU0	1.24042	-0.367915	1.85854	-0.477949	1.26947	0.178304	1.30985	0.964635
NEMVEDRAFT_v1g183903	A7RZW4	-1.01763	0.0658922	-0.766059	0.0770197	-0.0927576	-0.0492138	-1.12203	-1.22392
NEMVEDRAFT_v1g183924	A7RZX6	-1.50877	0.614615	-0.752952	0.305339	-1.47855	-0.370764	0.135043	-1.26392
NEMVEDRAFT_v1g183962	A7S003	-0.685864	0.618601	-0.0701451	-0.687818	0.401752	1.13038	-0.162554	0.810587
NEMVEDRAFT_v1g184098	A7S0C0	-0.894421	-0.242829	-0.690734	0.415896	-0.488212	0.0709476	-0.402448	-0.627277
NEMVEDRAFT_v1g184207	A7S0M8	-1.83082	-0.545016	0.302334	-0.111406	-0.229171	0.582058	1.32622	-1.09093
NEMVEDRAFT_v1g184404	A7S170	-1.77763	-0.888942	-0.184745	0.755283	0.55901	-0.986869	-0.192334	-0.827095
NEMVEDRAFT_v1g184426	A7S183	-1.23205	-0.609629	-0.0994883	0.861503	0.766588	-1.09562	-0.514409	-0.849889
NEMVEDRAFT_v1g184512	A7S1H0	-1.50004	0.0226579	0.00363783	0.540868	0.10337	-0.57041	0.646779	-1.39419
NEMVEDRAFT_v1g184605	A7S1R4	-1.12335	-0.286386	-0.485791	0.663641	-0.703008	-0.0340406	0.240967	-1.40753
NEMVEDRAFT_v1g184716	A7S260	-2.07417	0.128564	1.10605	-0.873816	0.0826629	1.70152	2.31467	-0.604672
NEMVEDRAFT_v1g184779	A7S2B4	-1.17568	-0.334618	0.359738	0.917264	0.921997	-0.721631	0.54034	-1.95863
NEMVEDRAFT_v1g184895	A7S2J6	0.810699	-0.0939076	0.794422	-0.765518	0.0192567	0.559444	0.741587	0.789145
NEMVEDRAFT_v1g185074	A7S351	0.667448	-0.150059	0.265327	0	-0.213789	0	0.270024	0
NEMVEDRAFT_v1g185114	A7S382	-1.00491	-0.270053	-0.137142	0.927522	0.13932	-0.612445	0.203884	-1.22131
NEMVEDRAFT_v1g185184	A7S3C7	-3.13541	-0.998014	-1.05354	0.950662	-0.376735	-0.843152	-0.705067	-2.04448
NEMVEDRAFT_v1g185216	A7S3F9	1.64879	-1.82711	0.653421	-0.0122117	-0.384956	-1.81914	0.0779595	0.723686
NEMVEDRAFT_v1g185226	A7S3H1	-1.92745	-0.739133	0.32124	1.25902	1.0373	-1.49569	0.500014	-1.35802
NEMVEDRAFT_v1g185308	A7S3U5	0.715968	-0.691688	0.321836	0	0.0287871	0	-0.0333585	0
NEMVEDRAFT_v1g185545	A7S4F0	-3.02492	0.442932	-0.791141	-0.963975	-0.14701	1.0357	-0.537273	-0.508441
NEMVEDRAFT_v1g185581	A7S4K7	-1.31045	0.00667064	-0.20259	0	0.182969	0	0.060208	0
NEMVEDRAFT_v1g185619	A7S4N8	-1.08485	-0.450488	-0.0170513	0.449556	0.388436	-1.18154	0.22886	-0.558383
NEMVEDRAFT_v1g185623	A7S4P4	-1.38737	0.540417	-0.135576	0	0.740193	0	-0.528556	0
NEMVEDRAFT_v1g185856	A7S5C2	1.7939	-0.745482	1.75159	0	0.866304	0	0.917588	0
NEMVEDRAFT_v1g186132	A7S629	-0.6794	-0.330441	-0.269468	0.611148	0.102934	-0.167119	-0.169824	-0.772365
NEMVEDRAFT_v1g186153	A7S642	-2.0046	-1.00055	-0.480103	1.24073	0.14116	-1.47241	-0.220559	-2.54882
NEMVEDRAFT_v1g186249	A7S6D8	-1.35335	-0.793213	-0.609849	1.23487	0.0381829	-1.3687	-0.608426	-1.8912
NEMVEDRAFT_v1g186301	A7S6J5	-0.650278	0.196992	-0.250736	0	-0.110506	0	0.0470685	0
NEMVEDRAFT_v1g186309	A7S6K2	-1.8913	-0.0919279	-0.541798	0.780925	-0.067175	-0.348926	-0.15266	-1.91456
NEMVEDRAFT_v1g186367	A7S6Q5	0.796484	-0.428491	0.307714	-0.305391	-0.297032	-0.309034	0.128257	0.654261
NEMVEDRAFT_v1g18675	A7SQA1	-2.64527	1.1053	-0.228585	-0.427861	-0.984958	-0.183648	0.887969	0.783392
NEMVEDRAFT_v1g186779	A7S7Y8	-0.887932	-0.301504	-0.259201	0.778201	0.0529764	-0.575612	0.025691	-1.21986
NEMVEDRAFT_v1g186944	A7S8H5	-2.63566	-0.236117	-0.203968	0.506617	0.289931	-0.259048	0.279121	-1.91024
NEMVEDRAFT_v1g187029	A7S8P6	-1.0965	-0.740652	0.0126977	1.02021	0.446242	-0.872548	0.246496	-2.27685
NEMVEDRAFT_v1g187131	A7S922	-0.956046	-0.272767	-0.373081	0.606486	-0.174045	-0.556955	-0.0390943	-1.25763
NEMVEDRAFT_v1g187212	A7S9F2	-1.37459	0.146737	-0.390678	0.429812	0.458129	-0.113514	-0.794471	-0.987194
NEMVEDRAFT_v1g187301	A7S9N7	0.803125	-0.832572	0.506896	0	0.0109873	0	0.285219	0
NEMVEDRAFT_v1g187372	A7S9X8	1.05643	-0.586464	0.323287	-0.0383413	-0.235761	-0.433406	-0.694769	0.624169
NEMVEDRAFT_v1g187451	A7SA55	0.966552	-0.275107	0.294639	-1.1072	-0.392342	0.94449	-0.0469944	1.74414
NEMVEDRAFT_v1g187737	A7SAZ3	-1.92629	-0.137099	-0.118734	0.521082	0.960989	-0.941316	-0.876726	-0.451216
NEMVEDRAFT_v1g187863	A7SBG2	-1.1872	-0.376386	-0.0244347	0.985718	0.610959	-0.640372	0.00965807	-1.61327
NEMVEDRAFT_v1g188039	A7SC12	-2.33645	-0.239535	-0.951832	0.918498	-0.203956	-0.242258	-0.826437	-2.36867
NEMVEDRAFT_v1g188073	A7SC61	-1.93676	-0.10072	0.13978	-0.375314	-0.0639734	0.921732	1.0577	-1.98632
NEMVEDRAFT_v1g188080	A7SC73	-1.17571	0.271289	0.239354	-0.755404	-0.217723	1.42887	1.08735	-0.855707
NEMVEDRAFT_v1g188209	A7SCK7	-3.87055	-0.259606	-0.906214	0.8542	-0.330053	-0.920937	-0.39924	-1.66002
NEMVEDRAFT_v1g188264	A7SCR6	-0.751778	0.408031	-0.600419	-0.843052	-0.46706	0.433023	-0.460336	-1.44645
NEMVEDRAFT_v1g188332	A7SCY7	-1.22933	0.208126	0.0688468	0	0.956087	0	-0.546738	0
NEMVEDRAFT_v1g188563	A7SDJ7	-1.47391	0.462675	-0.313258	-0.691656	-0.531853	0.450115	0.518231	0.83606
NEMVEDRAFT_v1g188687	A7SDY7	0.953847	0.112256	0.733849	-0.686305	-0.0164721	0.533598	0.669272	0.83911
NEMVEDRAFT_v1g188797	A7SE80	-1.08172	-0.180671	-0.0223899	0.893793	0.564321	-0.931019	0.0365999	-0.827085
NEMVEDRAFT_v1g188861	A7SEE4	-1.29445	-0.828749	-0.00276311	1.14025	0.516877	-1.02314	0.260098	-1.40609
NEMVEDRAFT_v1g188880	A7SEI5	-3.59007	1.97235	-0.613728	-1.52812	0.173011	1.57874	-0.44603	1.3706
NEMVEDRAFT_v1g188942	A7SEN4	1.11629	-0.595722	1.22078	-0.622878	0.691485	-0.225153	0.834546	1.49304
NEMVEDRAFT_v1g189007	A7SET4	0.616308	0.112535	0.272345	0	0.195284	0	-0.0604182	0
NEMVEDRAFT_v1g189020	A7SEU5	-2.10355	0.46008	2.27693	0.568556	2.38654	-1.91989	2.95597	-0.87465
NEMVEDRAFT_v1g189070	A7SF08	-0.720962	-0.443257	-0.367915	0.615382	-0.0668827	-0.687625	-0.198006	-0.84088
NEMVEDRAFT_v1g189079	A7SF14	-0.861309	-0.375522	0.198767	0.573962	1.00748	-0.509366	-0.347804	-0.653655
NEMVEDRAFT_v1g189113	A7SF31	-1.2092	0.619171	-0.748645	-0.640683	-0.668404	0.471605	-0.215176	0.747328
NEMVEDRAFT_v1g189134	A7SF49	-0.934848	-0.721457	-0.00484345	0.538725	0.485238	-0.492163	0.0907765	-0.593004
NEMVEDRAFT_v1g189222	A7SFF2	-1.19606	0.782696	-0.290914	-0.566501	-0.107496	1.29181	0.135893	-1.12707
NEMVEDRAFT_v1g189239	A7SFG5	0.721258	-0.850118	1.16928	0.342155	1.0386	-0.721651	0.937336	0.285859
NEMVEDRAFT_v1g189255	A7SFJ3	0.845293	0.00599538	0.484692	-1.05844	0.0276431	0.710029	0.0223741	1.16757
NEMVEDRAFT_v1g189645	A7SGL6	-1.56076	1.65571	0.324101	-0.333902	0.522137	1.14055	0.897216	-1.37341
NEMVEDRAFT_v1g189660	A7SGM8	-0.611797	-0.476361	0	0.867642	0	-1.03598	0	-0.914243
NEMVEDRAFT_v1g189854	A7SHB6	0.920667	-0.084746	0.120359	0.00975219	0.113392	-0.078411	-0.791165	-0.675853
NEMVEDRAFT_v1g189883	A7SHD8	1.43049	-0.624312	1.12889	-0.405176	0.227573	-0.344768	0.536719	0.968985
NEMVEDRAFT_v1g189992	A7SHU9	1.66905	-0.607923	1.38446	-0.955771	0.0593267	0.165386	0.90576	1.85019
NEMVEDRAFT_v1g190019	A7SHX1	-1.0801	1.32726	0.180935	-0.702221	0.733328	1.49033	0.250972	0.336918
NEMVEDRAFT_v1g190171	A7SII0	-1.53508	-0.614357	-0.905894	0.713817	-0.0685621	-0.82028	-1.19694	-1.81987
NEMVEDRAFT_v1g190239	A7SIT3	-1.08334	-0.143374	-0.118899	0	0.354211	0	0.00647672	0
NEMVEDRAFT_v1g190325	A7SJ61	0.776058	-0.542571	0.62231	-0.462922	0.192441	-0.288234	0.575184	0.585686
NEMVEDRAFT_v1g190500	A7SJL1	-1.36793	-0.279632	-0.0542519	0.510667	0.744033	-0.434148	-0.235692	-0.868022
NEMVEDRAFT_v1g190506	A7SJL4	1.27099	-1.11612	1.23162	-0.236686	0.185646	-0.636228	0.988546	0.950802
NEMVEDRAFT_v1g190533	A7SJM9	-3.44688	0.31496	-1.24768	0.597082	-0.346993	0.0829482	-1.22599	-1.52836
NEMVEDRAFT_v1g190553	A7SJQ0	-1.09457	0.12645	-0.0310263	0	0.513171	0	0.0992863	0
NEMVEDRAFT_v1g190658	A7SJZ7	-1.52547	-0.622951	0.116163	0.223479	0.321803	0.0797696	0.718857	-0.630358
NEMVEDRAFT_v1g190699	A7SK48	1.00727	-0.272234	0.018269	-0.569348	-1.34028	-0.146655	-0.34253	0.844872
NEMVEDRAFT_v1g190891	A7SKT2	0.858909	-0.687908	0.472962	0.203919	0.498203	-0.457894	-0.532963	-0.224017
NEMVEDRAFT_v1g190941	A7SKY7	-2.49693	1.12884	0.100817	-0.138309	0.980579	-0.0155469	0.003007	-0.602353
NEMVEDRAFT_v1g191325	A7SMF8	-1.02543	0.314451	-0.252654	0.512947	0.300828	-0.953085	-0.468529	-1.05054
NEMVEDRAFT_v1g191344	A7SMI2	-1.55649	-0.190172	-0.702313	-0.383383	-0.125379	0.118129	-0.666992	-1.12861
NEMVEDRAFT_v1g191391	A7SMP1	-0.847124	0.148149	-0.130489	0	-0.0170355	0	0.27995	0
NEMVEDRAFT_v1g191409	A7SMR2	-3.52397	-0.12492	0.836273	0.76192	2.22832	-1.23386	-0.966679	-0.715375
NEMVEDRAFT_v1g19149	A7SS57	1.55649	0.334877	0.780053	-1.40427	-0.438277	1.48779	-0.267612	1.16613
NEMVEDRAFT_v1g191511	A7SMZ3	-2.07107	-0.220104	-0.352803	0.698131	0.388778	-0.645437	-0.316777	-1.38023
NEMVEDRAFT_v1g191557	A7SN34	0.634812	-0.209885	0.349598	-0.523551	-0.0428828	0.00191241	0.351947	0.875579
NEMVEDRAFT_v1g191624	A7SNA7	-1.33886	0.165269	-0.411257	0.205338	0.166059	0.412858	-0.279321	-1.78338
NEMVEDRAFT_v1g191789	A7SNR3	-0.869322	-0.425143	0.0578721	0.656885	0.403377	-0.251111	0.321148	-1.49031
NEMVEDRAFT_v1g191860	A7SNX0	-1.38422	0.329056	0.929861	0.424815	1.78125	-0.61889	0.557588	-0.385011
NEMVEDRAFT_v1g191947	A7SP59	1.25864	-0.357997	1.7078	-0.798939	1.38145	0.448551	0.515704	0.867866
NEMVEDRAFT_v1g192469	A7SQP7	-1.11897	0.378606	0.685711	0	1.14528	0	0.876929	0
NEMVEDRAFT_v1g192492	A7SQR1	-1.25227	0.132903	-1.17551	0	-1.21596	0	-0.664478	0
NEMVEDRAFT_v1g192525	A7SQU5	-2.16924	-1.25515	-0.374096	2.05841	0.00565792	-1.61279	0.177496	-3.66971
NEMVEDRAFT_v1g192610	A7SR70	-0.793894	-0.387624	-0.698142	0.814077	-0.186957	-1.00494	-0.913533	-0.766793
NEMVEDRAFT_v1g192648	A7SR90	-1.22698	0.561346	0.306315	-0.168416	0.84134	0.773085	0.520228	-0.649816
NEMVEDRAFT_v1g192701	A7SRF1	-2.16741	-0.0177746	0.458697	-0.942198	1.46164	1.72203	-0.0182667	-1.64835
NEMVEDRAFT_v1g192736	A7SRJ1	1.0876	-0.453553	0.846663	-0.827868	0.230907	0.23782	0.076899	0.977118
NEMVEDRAFT_v1g192750	A7SRK9	-1.21427	-0.739278	-0.49142	0.818957	-0.212334	-0.362622	-0.0582726	-1.3642
NEMVEDRAFT_v1g192886	A7SRZ1	-1.5527	-0.387255	-0.262731	0.414745	0.070064	-1.01526	0.230838	-1.59845
NEMVEDRAFT_v1g192985	A7SSB1	-0.763219	0.0311027	0.103752	0.604399	0.650175	-0.663668	0.0329571	-0.725868
NEMVEDRAFT_v1g193454	A7STS0	-2.80948	0.899143	-0.193505	-1.26789	0.221771	0.945045	0.364764	-0.205747
NEMVEDRAFT_v1g193548	A7SU20	-1.94582	-0.514365	-0.730602	-0.0402463	-0.506809	0.401193	-0.244606	-3.13831
NEMVEDRAFT_v1g193638	A7SUE4	-2.12846	-0.437129	0.907857	-0.475263	-0.063963	0.919229	2.10394	-0.122416
NEMVEDRAFT_v1g193865	A7SV11	1.06529	-0.127674	0.357251	0	0.0585992	0	-0.252175	0
NEMVEDRAFT_v1g194035	A7SVN6	-1.74861	-0.584057	0.0482462	-0.847203	0.316074	0.335232	0.411563	-0.755703
NEMVEDRAFT_v1g194038	A7SVN7	-1.70339	-0.116825	-0.294515	0.550989	0.225344	-0.536007	-0.018293	-1.34267
NEMVEDRAFT_v1g194368	A7SWY9	-1.05275	-0.661233	0.00542846	0.858366	0.626199	-1.68515	-0.0306418	-0.817265
NEMVEDRAFT_v1g194445	A7SX94	-0.820041	-0.183592	-0.306931	0	0.280113	0	-0.432424	0
NEMVEDRAFT_v1g194611	A7SXQ6	-1.33301	-0.714697	-0.602691	0.630327	-0.17646	-0.286667	-0.441109	-2.224
NEMVEDRAFT_v1g194666	A7SXZ6	-1.68278	-0.239618	-0.205135	0.8151	0.195017	-0.834828	0.253303	-1.13518
NEMVEDRAFT_v1g194914	A7SZ54	1.77012	1.00734	0.581754	-1.00479	-0.464417	1.14129	-1.05114	0.32986
NEMVEDRAFT_v1g194939	A7SZA6	-0.713777	0.0479572	0	-0.488174	0	1.0509	0	0.707921
NEMVEDRAFT_v1g195059	A7SZU3	-0.83522	-0.110488	-0.0876745	0.344149	-0.0196311	0.108789	0.39034	-1.11033
NEMVEDRAFT_v1g195162	A7T0F2	-2.89013	0.0744195	0.631297	0.177785	-0.342061	0.660733	1.88191	-1.4119
NEMVEDRAFT_v1g195205	A7T0N3	1.19871	0.00868815	0.83255	0	0.0953095	0	-0.308439	0
NEMVEDRAFT_v1g195312	A7T142	-1.31557	-0.391703	-0.285813	0.715831	0.247729	-0.933213	-0.102365	-0.687339
NEMVEDRAFT_v1g195566	A7T2D4	-1.25221	-0.884208	0.347205	0.227772	0.375387	-0.664729	1.02079	-0.515479
NEMVEDRAFT_v1g195668	A7T3B4	-5.27911	0.32806	-1.02185	0.981774	0.096662	-0.523131	-1.44716	-0.974023
NEMVEDRAFT_v1g195792	A7T538	-2.32282	-0.473168	-0.858012	-0.097501	0.263338	0.374801	-1.67107	-2.19658
NEMVEDRAFT_v1g195848	A7T5S5	-4.12636	-0.812569	-0.0525074	1.18687	0.774043	-4.15638	0.172602	-1.73919
NEMVEDRAFT_v1g196236	A7RF22	1.34742	-0.832333	0.20376	-0.32618	-0.200858	0.922148	-1.35169	0.300477
NEMVEDRAFT_v1g196253	A7RF33	1.29581	-0.523787	2.55268	-1.65891	2.31513	0.768774	2.0467	2.58232
NEMVEDRAFT_v1g196350	A7RFB1	0.765232	-0.038556	0.0352428	-0.799259	-0.612634	0.327522	-0.214207	1.34334
NEMVEDRAFT_v1g196456	A7RFK7	-1.12936	-1.10367	-0.402627	1.09412	0.256455	-2.43286	-0.761185	-0.328859
NEMVEDRAFT_v1g196469	A7RFL6	-4.12763	1.78191	0.249475	-0.490301	-0.709265	0.625269	1.48904	0.0838706
NEMVEDRAFT_v1g196546	A7RFS7	-1.2195	-0.778656	-0.232244	1.04129	0.0965683	-2.89815	0.107945	-0.926621
NEMVEDRAFT_v1g196609	A7RFY2	-0.767652	-0.272443	0.289043	1.00067	0.46319	-1.23896	0.676311	-1.41539
NEMVEDRAFT_v1g196611	A7RFY3	-1.58246	0.408082	0.712063	-0.54791	0.379073	0.652627	1.62602	0.766786
NEMVEDRAFT_v1g196686	A7RG34	2.35792	-0.494316	2.25728	-1.39495	-0.0808931	0.951196	1.57269	1.97812
NEMVEDRAFT_v1g196727	A7RG72	-1.07413	-0.747256	0.484724	1.60766	1.25893	-2.34699	0.0684011	-1.23549
NEMVEDRAFT_v1g196762	A7RGA2	-9.51253	2.6229	0.704394	-4.16911	-5.61889	-4.25965	2.28281	5.71845
NEMVEDRAFT_v1g196763	A7RGA3	-4.10764	0.372578	-0.450807	1.09933	-5.29506	-4.33262	1.08128	-0.00459784
NEMVEDRAFT_v1g196772	A7RGB3	-1.36414	0.0529643	-0.973296	0.251774	-0.358104	0.116641	-1.08429	-1.58016
NEMVEDRAFT_v1g196990	A7RGY6	-1.3381	-0.306363	0.0657077	0.396269	0.644282	-0.879774	0.243093	-1.1742
NEMVEDRAFT_v1g197000	A7RGZ5	0.877449	-0.909756	0.41788	0.534606	0.220832	-1.92356	-0.457461	-0.66287
NEMVEDRAFT_v1g197088	A7RH68	-2.31518	-0.0269963	-0.788554	0.844285	-0.828174	-0.429514	-0.0210179	-1.33096
NEMVEDRAFT_v1g197092	A7RH71	-2.48665	-2.02121	0.331738	-0.677184	0.806346	0.101038	0.737853	-1.04143
NEMVEDRAFT_v1g197093	A7RH72	-1.02535	-0.0402923	0.422772	0.385393	0.992275	-0.276743	0.467988	-0.745569
NEMVEDRAFT_v1g197133	A7RHA8	2.06509	0.762542	0.211364	-1.88251	-2.14057	1.64937	-1.68813	1.6064
NEMVEDRAFT_v1g197140	A7RHB2	-1.90084	-0.383693	0.351538	0.943043	0.0657897	-0.34875	1.29208	-1.19424
NEMVEDRAFT_v1g197179	A7RHF1	-3.1196	-1.18374	0.683497	-1.83438	1.93324	2.26731	-0.503649	-0.203666
NEMVEDRAFT_v1g197208	A7RHH9	-1.9843	1.3624	0.677927	0.280823	0.79817	-2.35703	1.18042	-0.715392
NEMVEDRAFT_v1g197214	A7RHI8	1.95025	-0.164167	1.20308	-1.74199	-0.0282878	1.09016	-0.227982	2.77163
NEMVEDRAFT_v1g197314	A7RHS9	0.787861	-0.384513	0.982561	-0.38226	0.458357	-0.0706796	0.839384	0.857033
NEMVEDRAFT_v1g197466	A7RI52	1.99199	0.317133	0.788334	-0.517374	-1.01342	0.0463796	-0.990187	0.297712
NEMVEDRAFT_v1g197491	A7RI77	-2.2611	-0.607524	-0.0961115	0.72514	0.911281	-0.499804	-0.478849	-1.07035
NEMVEDRAFT_v1g197497	A7RI84	1.37209	-0.291257	0.127116	-0.758334	-0.860413	1.12318	-0.623941	0.931741
NEMVEDRAFT_v1g197633	A7RIJ3	-3.70204	0.683247	0.726302	0.996682	-1.48372	-1.65467	2.15934	-1.65644
NEMVEDRAFT_v1g197733	A7RIS7	1.37948	-0.308341	1.44042	-1.06186	0.685194	0.613051	0.731001	1.48488
NEMVEDRAFT_v1g197883	A7RJ57	-1.36817	-0.717328	-0.142295	1.33764	0.602232	-1.27515	-0.249613	-2.2535
NEMVEDRAFT_v1g197921	A7RJ85	1.65511	-0.768679	0.758964	-1.08406	-0.394165	-0.0242098	-0.121794	2.22128
NEMVEDRAFT_v1g197962	A7RJC2	-1.07926	-0.00184473	-0.571909	-0.626891	-1.13934	1.24595	0.242367	-1.11893
NEMVEDRAFT_v1g197996	A7RJF1	2.05422	-0.941999	1.52674	0.764526	0.0370937	-2.11638	-0.323076	-0.574266
NEMVEDRAFT_v1g198080	A7RJL9	2.20277	-0.446177	1.77514	-1.48899	-0.227222	0.994331	0.576805	2.10322
NEMVEDRAFT_v1g198216	A7RJX9	-5.62891	4.60852	-0.223459	-3.28684	-1.58445	-1.3152	1.13728	2.89027
NEMVEDRAFT_v1g198273	A7RK43	2.18724	-0.288846	0.861477	-0.643959	-1.12711	0.0399965	-1.56781	1.13467
NEMVEDRAFT_v1g198317	A7RK75	-3.66959	-3.35249	3.51277	0.510798	4.62412	0.284714	3.12401	-1.65065
NEMVEDRAFT_v1g198339	A7RK95	0.881897	-0.32017	0.52378	-0.333696	0.254543	-0.33226	0.284829	-1.02729
NEMVEDRAFT_v1g198391	A7RKE2	-1.30404	0.206644	-0.135958	0.591756	0.0390977	0.0338141	0.36989	-1.84565
NEMVEDRAFT_v1g198399	A7RKE9	1.01994	-0.800518	0.729289	-0.0132664	-0.284426	-0.545414	0.530371	0.428869
NEMVEDRAFT_v1g198469	A7RKL3	1.91194	-0.253628	-0.154354	-0.975692	-1.77797	1.74518	-1.97764	0.965197
NEMVEDRAFT_v1g198482	A7RKM3	0.947451	-0.0782288	0.739025	-0.834506	-0.156892	-0.101019	0.476814	1.547
NEMVEDRAFT_v1g198562	A7RKT7	-0.662946	-0.359793	0	0.453896	0	-1.45518	0	-0.0762842
NEMVEDRAFT_v1g198567	A7RKU2	-1.31604	1.15978	0.590734	-0.345995	1.35485	1.34247	0.464851	-0.905554
NEMVEDRAFT_v1g198654	A7RL22	-1.44029	0.54855	-0.529983	0.0900711	-0.252447	0.515215	-0.176521	-0.968407
NEMVEDRAFT_v1g198667	A7RL30	-1.5906	0.851077	-1.40672	0.156277	-1.6318	-0.279775	-0.899691	-0.0470552
NEMVEDRAFT_v1g198733	A7RL81	-2.54004	0.898492	1.02255	0.478165	1.31635	-0.463879	1.66047	-1.81298
NEMVEDRAFT_v1g198796	A7RLD1	-1.7663	0.307707	0.422985	0.377988	1.18193	-1.03154	0.354897	-0.208139
NEMVEDRAFT_v1g198875	A7RLK2	1.78601	-0.724851	-0.485166	0.073058	-2.80671	1.17269	-0.890649	-0.435917
NEMVEDRAFT_v1g198897	A7RLM1	1.51958	-0.14985	0.562828	-1.05865	-0.740077	0.68515	-0.383346	0.331111
NEMVEDRAFT_v1g198907	A7RLN0	-2.2812	0.989428	0.525919	-0.729913	0.669197	1.39467	1.24941	-1.26755
NEMVEDRAFT_v1g198910	A7RLN3	2.58756	-0.435738	0.566896	-1.88005	-1.04096	1.96969	-1.6032	3.0982
NEMVEDRAFT_v1g198958	A7RLR1	-1.24652	-0.952287	-0.0342092	0.271444	0.476737	0.189915	0.157314	-1.47275
NEMVEDRAFT_v1g198963	A7RLR5	1.14682	-0.429709	1.2182	0	0.816818	0	0.177253	0
NEMVEDRAFT_v1g199061	A7RLY8	1.10699	-0.0440786	0.353975	-0.136995	-0.270428	-0.721444	-0.144904	0.313726
NEMVEDRAFT_v1g199217	A7RMA9	0.858953	0.189614	0.672579	-0.492701	0.524787	0.272209	0.144476	1.0923
NEMVEDRAFT_v1g199243	A7RMD1	1.0591	0.399015	-0.176745	-0.767451	-1.24432	0.718465	-0.676182	0.76325
NEMVEDRAFT_v1g199298	A7RMI7	-1.28812	0.358197	0.211015	0.38261	0.401687	-0.581454	0.673751	-0.339336
NEMVEDRAFT_v1g199299	A7RMI8	-1.5191	-0.614912	0.937262	1.50805	1.41442	-3.23129	1.25168	-2.11252
NEMVEDRAFT_v1g199338	A7RMM3	1.09703	0.0793427	-0.00152044	-0.844929	-0.915301	0.156419	-0.649967	1.58192
NEMVEDRAFT_v1g199377	A7RMP6	-2.91731	-0.894169	-1.04574	1.02287	-0.397622	-0.782731	-0.714862	-1.82899
NEMVEDRAFT_v1g199422	A7RMS8	1.05348	-0.553345	1.43369	-0.829094	1.23687	-0.0918551	0.816797	1.86276
NEMVEDRAFT_v1g199428	A7RMT5	-3.53737	-0.426157	0.692603	1.87586	1.29788	-2.49566	1.15472	-2.4481
NEMVEDRAFT_v1g199450	A7RMV0	-0.988091	-0.251985	-0.17847	0.437599	-0.422567	-0.836803	0.534202	0.0470549
NEMVEDRAFT_v1g199504	A7RMY3	5.09878	-3.78155	6.27254	-3.49484	-2.08824	1.3104	1.64018	4.39347
NEMVEDRAFT_v1g199560	A7RN36	-1.87482	-0.939696	0.624682	0.304698	0.684578	-0.86763	1.34564	-0.191858
NEMVEDRAFT_v1g199578	A7RN54	0.965298	-0.179755	0.583488	0	0.0735064	0	0.448337	0
NEMVEDRAFT_v1g199592	A7RN69	1.26348	0.114019	0.909779	-0.784369	0.190302	0.063805	-0.00942537	0.590879
NEMVEDRAFT_v1g199622	A7RN96	1.96095	-1.23972	1.38179	-1.62017	0.464426	0.425143	-0.223868	2.34413
NEMVEDRAFT_v1g199627	A7RNA2	-4.86603	0.357052	-1.69285	0	-1.23699	0	-1.19558	0
NEMVEDRAFT_v1g199711	A7RNH2	0.670561	0.0908177	0.180714	0	-0.402212	0	-0.0384921	0
NEMVEDRAFT_v1g199753	A7RNK8	-1.74242	-0.403852	-0.883982	0.822732	-1.04099	-0.259285	-0.14114	-2.03475
NEMVEDRAFT_v1g199823	A7RNR5	-2.00625	-0.10141	0.130514	0.930002	0.789373	-0.600893	0.360449	-2.19204
NEMVEDRAFT_v1g199885	A7RNW5	1.74588	-1.74613	1.75464	-0.723163	-0.450744	-1.90783	1.32663	1.69923
NEMVEDRAFT_v1g199903	A7RNY2	1.47426	-0.0640482	1.12468	-0.527883	-0.117542	0.618307	0.471265	0.856862
NEMVEDRAFT_v1g199941	A7RP15	-4.02894	-2.51183	2.83459	-3.62424	4.24244	4.29187	0.791827	-5.08752
NEMVEDRAFT_v1g199956	A7RP28	-2.26088	-0.391253	0.249837	1.33154	0.657029	-0.867277	0.790523	-1.66961
NEMVEDRAFT_v1g199963	A7RP35	-1.16921	-0.161727	0.263248	-0.963673	-0.218692	1.21516	1.08614	0.121215
NEMVEDRAFT_v1g199985	A7RP54	0.892039	-0.83774	1.11203	-0.2004	0.561835	-0.642916	0.980182	1.14405
NEMVEDRAFT_v1g199991	A7RP59	1.34855	-0.0805814	1.43414	-1.28548	0.795668	1.68631	0.595985	0.543698
NEMVEDRAFT_v1g199992	A7RP60	1.2794	-0.162346	0.414573	-1.17818	-0.0423524	0.832599	-0.866305	1.0133
NEMVEDRAFT_v1g200004	A7RP72	2.26317	-0.458836	1.83399	-1.26556	-0.172308	1.24556	0.223385	1.85966
NEMVEDRAFT_v1g200012	A7RP77	-4.17538	0.654725	0.356704	0.834245	0.684572	-1.52522	1.08132	-0.841653
NEMVEDRAFT_v1g200013	A7RP78	-0.839773	-0.385558	-0.207976	0	0.371155	0	-0.330897	0
NEMVEDRAFT_v1g200061	A7RPB2	1.14498	0.00383529	0.219005	-1.0543	-1.21538	0.473088	-0.479153	1.61891
NEMVEDRAFT_v1g200084	A7RPD1	2.13796	-1.26557	0.889732	-0.628396	-0.200864	0.367745	-0.734998	0.464112
NEMVEDRAFT_v1g200128	A7RPF8	1.90543	-1.81032	0.23432	-0.310394	-0.920662	0.341209	-1.3268	0.317997
NEMVEDRAFT_v1g200202	A7RPL1	1.07647	-0.351883	0.277052	-0.776878	-0.433757	0.170011	-0.222683	0.696885
NEMVEDRAFT_v1g200208	A7RPL7	2.62663	-0.966911	1.18094	-0.809309	-0.252441	0.159382	-1.53018	-0.782046
NEMVEDRAFT_v1g200257	A7RPQ1	-1.32309	0.388405	-0.53886	0	-0.0681288	0	-0.396419	0
NEMVEDRAFT_v1g200285	A7RPS6	-0.773816	-0.0072491	-0.177763	0	-0.000299919	0	0.172577	0
NEMVEDRAFT_v1g200323	A7RPV8	-1.78338	-1.10932	0.107744	-1.17687	0.562124	0.643911	0.33975	-2.0105
NEMVEDRAFT_v1g200332	A7RPW6	-3.36696	-0.541264	0.293245	-2.00374	1.13109	1.8604	0.296083	0.391306
NEMVEDRAFT_v1g200396	A7RQ17	0.875535	-0.267025	0.395532	-0.252125	-0.682155	-0.459041	0.533774	0.615404
NEMVEDRAFT_v1g200442	A7RQ47	1.63918	-0.126358	0.599234	-0.578813	0.409803	0.457653	-1.06007	1.59687
NEMVEDRAFT_v1g200449	A7RQ53	-3.28086	0.669616	0.899126	-1.31881	-0.885019	1.57659	2.29226	0.465467
NEMVEDRAFT_v1g200451	A7RQ54	2.21997	-2.24477	0.382335	1.13945	-1.11395	-3.28941	-2.47308	-0.25362
NEMVEDRAFT_v1g200452	A7RQ55	2.29427	-2.16694	0.839763	1.20248	-0.417185	-3.57046	-1.83931	-0.156542
NEMVEDRAFT_v1g200488	A7RQ88	1.62243	0.228115	0.214925	-0.933291	-2.14988	0.804324	-1.18399	0.80046
NEMVEDRAFT_v1g200504	A7RQA1	-2.10274	1.1822	0.398417	-0.175596	1.28109	1.0637	0.233304	-0.701498
NEMVEDRAFT_v1g200569	A7RQF3	-1.70367	0.095131	-0.416404	0.735459	0.0447689	-0.379791	-0.043942	-1.76581
NEMVEDRAFT_v1g200585	A7RQG9	-1.27699	-1.01231	-0.384378	1.28793	0.384512	-1.20398	-0.628176	-1.98388
NEMVEDRAFT_v1g200670	A7RQP3	1.05673	-0.0930948	0.679648	-0.718649	0.288776	0.368645	-0.234193	0.822014
NEMVEDRAFT_v1g200697	A7RQR1	-1.12916	-0.1511	-0.712408	1.01682	-0.708701	-1.28973	-0.273929	-1.99498
NEMVEDRAFT_v1g200699	A7RQR3	-1.08808	-1.73192	-0.377937	0.968419	-0.607345	-1.92498	0.349806	-1.14057
NEMVEDRAFT_v1g200879	A7RR52	1.93095	-1.41632	0.670483	0.265729	-0.895854	-1.63917	-0.440984	0.897721
NEMVEDRAFT_v1g200924	A7RR92	0.748022	-0.353116	0.421186	0.563656	-0.042903	-1.01707	0.377394	-0.609947
NEMVEDRAFT_v1g201054	A7RRJ0	-2.21421	-0.463661	-0.509331	0.669062	0.160237	-0.558009	-0.307146	-2.34338
NEMVEDRAFT_v1g201155	A7RRS5	1.16029	-1.03793	0.167682	0.490586	-0.303981	-1.25477	-0.723979	-0.275665
NEMVEDRAFT_v1g201163	A7RRT3	1.49026	-0.106123	1.11931	0	0.301068	0	0.78638	0
NEMVEDRAFT_v1g201177	A7RRU3	-1.69934	-1.1186	-0.0177996	1.64752	0.404574	-1.30024	0.442522	-2.25426
NEMVEDRAFT_v1g201226	A7RRX8	-2.97904	-1.08662	-0.292727	1.75604	0.226552	-2.07383	0.215664	-4.03358
NEMVEDRAFT_v1g201307	A7RS38	1.23569	0.168471	0.54462	-1.15048	0.0994364	0.509612	-0.702986	1.55262
NEMVEDRAFT_v1g201458	A7RSH4	-1.79434	0.17326	1.2985	0.153169	1.20514	-2.65385	2.02485	-0.263746
NEMVEDRAFT_v1g201477	A7RSJ2	-1.57843	-0.566724	-0.0991238	0.654087	-0.519831	-1.5991	0.857243	-1.14102
NEMVEDRAFT_v1g201513	A7RSM4	1.65503	0.192427	-0.356459	-1.66007	-1.36818	1.7228	-2.7054	1.64439
NEMVEDRAFT_v1g201589	A7RST0	-1.1461	0.420839	0.375773	0	1.09404	0	0.196884	0
NEMVEDRAFT_v1g20161	A7S3G3	1.13078	-0.0413912	-0.190037	-1.19243	-1.6415	1.22436	-0.623397	1.76284
NEMVEDRAFT_v1g201704	A7RT06	2.19125	-0.299	1.81973	-0.829845	0.568809	0.926695	-0.503703	-0.906692
NEMVEDRAFT_v1g201705	A7RT07	2.05374	0.0852817	1.69799	-1.06049	0.298708	1.13165	-0.503697	-0.317156
NEMVEDRAFT_v1g201713	A7RT22	-2.85129	-3.15738	0.448364	-3.20381	1.28106	4.27168	0.368778	-0.689726
NEMVEDRAFT_v1g201718	A7RT27	1.62979	-1.30068	0.993444	0.284261	0.613694	-2.46404	-0.214053	1.14867
NEMVEDRAFT_v1g201724	A7RT31	1.41801	0.45758	0.559478	-0.866366	-0.206126	0.0941306	-1.38242	0.403959
NEMVEDRAFT_v1g201791	A7RT81	-0.67844	-1.08946	-0.326746	1.18838	-0.141647	-1.3303	-0.111816	-2.10736
NEMVEDRAFT_v1g201827	A7RTA9	-2.17463	0.0400857	-0.283675	0.951016	0.482417	-0.578838	-0.213303	-2.87813
NEMVEDRAFT_v1g201833	A7RTB2	-0.803103	-0.386304	-0.346977	0.363947	-0.211614	-0.713296	-0.283014	-0.494118
NEMVEDRAFT_v1g201879	A7RTF2	-3.60235	1.941	1.81406	0.284365	2.32842	-0.905807	2.27603	-1.96215
NEMVEDRAFT_v1g201894	A7RTG4	1.29077	0.405113	0.17163	-0.668585	-1.48845	0.0295401	-0.193294	1.03397
NEMVEDRAFT_v1g201904	A7RTH2	-3.48289	-1.41084	0.215953	2.54494	0.623125	-3.56322	0.865887	-4.14656
NEMVEDRAFT_v1g201949	A7RTK2	-2.15084	-1.16542	1.29631	0.71346	1.59795	-0.660067	1.81835	-0.85738
NEMVEDRAFT_v1g202054	A7RTT9	1.37316	-1.18213	1.39227	0.729049	0.725287	-1.27718	1.35228	-0.882162
NEMVEDRAFT_v1g202069	A7RTV0	1.09604	-0.369184	0.382432	-2.04707	-0.608821	2.24795	0.14847	2.98502
NEMVEDRAFT_v1g202086	A7RTW2	1.06359	0.115756	0.457292	-1.11985	-0.74787	0.44506	0.272261	1.67947
NEMVEDRAFT_v1g202173	A7RU22	0.622511	-0.0602871	0.182105	-0.468789	-0.2803	0.10652	0.0254063	0.934249
NEMVEDRAFT_v1g202226	A7RU66	-1.1996	-0.633865	0.159143	1.28513	0.481993	-2.05579	0.572604	-1.22191
NEMVEDRAFT_v1g202227	A7RU67	-4.67999	1.27735	1.87306	0.871325	2.25299	-1.04774	2.58296	-2.14878
NEMVEDRAFT_v1g202240	A7RU80	1.40246	-0.861732	0.20732	-0.142148	-1.16506	-0.127597	-0.321238	0.765472
NEMVEDRAFT_v1g202369	A7RUJ3	1.45221	-1.10837	0.887285	-1.17738	-0.652183	-0.44047	0.845535	2.04591
NEMVEDRAFT_v1g202524	A7RUY7	1.02522	0.18162	-0.218828	-0.750694	-1.29413	0.364379	-0.650225	1.27185
NEMVEDRAFT_v1g202620	A7RV61	0.793451	-0.639111	0.225131	-0.324785	-0.105818	-0.25057	-0.0645412	1.28788
NEMVEDRAFT_v1g202639	A7RV76	-1.48649	0.784172	0.0518959	-0.0850068	0.805713	0.943607	-0.107755	-1.42136
NEMVEDRAFT_v1g202715	A7RVE7	-3.44719	-2.37124	1.16926	-2.24937	2.49231	3.31355	-0.355579	-0.294358
NEMVEDRAFT_v1g202726	A7RVF7	-1.55971	0.0357786	1.13332	1.34027	1.33631	-2.06356	1.72862	-1.39005
NEMVEDRAFT_v1g202728	A7RVF9	-1.75187	-0.415478	0.888232	1.49706	1.24115	-2.38176	1.41046	-1.56954
NEMVEDRAFT_v1g202733	A7RVG4	-1.17485	-0.447602	0.659469	1.20885	1.31011	-1.0956	0.692658	-1.43184
NEMVEDRAFT_v1g202865	A7RVS9	-2.5275	-0.79102	-0.931698	1.02652	0.241785	-1.11008	-1.90231	-1.82988
NEMVEDRAFT_v1g202891	A7RVU9	1.05677	-0.375848	0.981417	-0.682157	0.743446	0.802592	0.344421	1.09702
NEMVEDRAFT_v1g202906	A7RVW5	-1.08544	0.491676	0.180709	0.389365	0.792048	-0.403411	0.185878	-0.846865
NEMVEDRAFT_v1g202972	A7RW05	-1.4322	0.624188	-0.0344437	-0.705943	-0.0299849	1.69956	0.667223	0.351645
NEMVEDRAFT_v1g202986	A7RW16	1.56119	-0.486354	1.8528	-1.1492	0.900449	0.971243	0.903553	1.67933
NEMVEDRAFT_v1g203088	A7RW99	-4.96088	-2.49723	1.75736	1.7357	2.24074	-1.78557	2.41223	-3.46934
NEMVEDRAFT_v1g203178	A7RWH3	1.14042	-1.67709	0.653518	0.477714	0.413991	-1.61249	-0.207546	0.509157
NEMVEDRAFT_v1g203195	A7RWI1	-0.875483	0.229514	0.297569	0.606998	0.919521	-0.547833	0.157876	-1.81554
NEMVEDRAFT_v1g203264	A7RWN3	-1.68907	0.187177	0.34528	0.621306	1.03488	0.0311138	0.478003	-1.95943
NEMVEDRAFT_v1g203286	A7RWP9	-2.05726	0.588262	-1.36297	0	-1.24746	0	-0.899665	0
NEMVEDRAFT_v1g203500	A7RX85	1.88083	-1.63312	0.0699469	0.366118	-1.62137	-1.74638	-1.86764	0.762185
NEMVEDRAFT_v1g203504	A7RX88	1.4083	0.104087	1.77267	-0.806394	1.02502	0.575742	0.478633	1.76964
NEMVEDRAFT_v1g203648	A7RXL4	-3.4346	-0.1579	-1.88115	0.564232	-1.49962	-0.174494	-1.44406	-4.12451
NEMVEDRAFT_v1g203745	A7RXU3	1.16613	-0.144509	0.793449	0	0.312768	0	0.344408	0
NEMVEDRAFT_v1g20376	A7S347	0.984261	-0.539826	0.528752	0.430426	-0.241353	-1.07323	-0.0972836	-0.124906
NEMVEDRAFT_v1g203830	A7RY17	-2.52075	-0.652613	0.0880453	1.25156	0.557544	-1.93489	0.565755	-1.49234
NEMVEDRAFT_v1g203857	A7RY42	1.67341	-0.329115	0.619053	-1.40732	-0.444837	1.24313	-1.28611	1.65851
NEMVEDRAFT_v1g203929	A7RYA4	-0.622761	-0.00883182	-0.058082	0	-0.026554	0	0.332294	0
NEMVEDRAFT_v1g203948	A7RYC1	-1.81329	-0.425399	0.141951	1.25178	0.770854	-1.28992	0.316791	-3.95184
NEMVEDRAFT_v1g204044	A7RYK2	-2.22389	0.00772621	-0.317845	0.511495	0.235413	-0.296362	0.00895568	-0.786763
NEMVEDRAFT_v1g204049	A7RYK8	1.41718	-0.285488	1.08241	-0.510323	0.795706	0.817153	-0.140975	1.34988
NEMVEDRAFT_v1g204099	A7RYP9	-9.74125	4.48358	-0.334956	-7.34579	-10.2184	1.71226	1.24979	7.74995
NEMVEDRAFT_v1g204115	A7RYR1	-1.94658	-0.216184	-0.4855	0.293888	0.134935	-1.31439	-0.569278	0.14869
NEMVEDRAFT_v1g204136	A7RYT0	0.961776	0.0103609	-0.251393	-1.82696	-0.713653	1.92585	-1.09683	0.805897
NEMVEDRAFT_v1g204295	A7RZ42	-1.37289	-0.237314	-0.111832	0.902741	0.472018	-0.517481	-0.0353031	-1.97033
NEMVEDRAFT_v1g204335	A7RZ67	-1.5334	0.545207	-0.187074	0.18014	0.138587	0.0196542	0.141694	-1.75102
NEMVEDRAFT_v1g204353	A7RZ79	-1.52213	0.186754	0.281634	0.24638	1.09463	0.269198	0.057525	-0.873258
NEMVEDRAFT_v1g204357	A7RZ85	1.08753	-0.369201	-0.568837	-0.534558	-1.68539	-0.364144	-1.09086	1.22289
NEMVEDRAFT_v1g204547	A7RZQ2	-1.98072	-0.571276	-0.500597	0.479624	-0.106624	-0.59913	-0.0867876	-1.92217
NEMVEDRAFT_v1g204597	A7RZT8	0.682554	-0.301821	0.656005	-0.593066	0.437854	0.856453	0.376281	1.12842
NEMVEDRAFT_v1g204664	A7RZZ1	2.26792	-0.90534	2.12863	-1.06121	0.760248	0.135999	-0.503617	0.930028
NEMVEDRAFT_v1g20472	A7SH66	1.27584	-0.340108	-0.315585	-0.641051	-1.45036	0.694437	-1.49645	0.348493
NEMVEDRAFT_v1g204742	A7S046	1.39356	-0.804776	1.7275	-0.208447	1.43289	-1.22555	0.388909	0.797831
NEMVEDRAFT_v1g204809	A7S0A0	-1.52226	0.0313279	0.866009	0.348365	1.21136	-2.34745	0.95973	-0.135807
NEMVEDRAFT_v1g204832	A7S0C2	-1.17868	0.187586	-1.4873	0	-1.53022	0	-1.24073	0
NEMVEDRAFT_v1g204856	A7S0E3	1.72626	0.644247	1.31428	-1.82531	-0.303938	2.003	0.447513	1.13873
NEMVEDRAFT_v1g204949	A7S0M0	-1.38451	0.0352493	0.152319	0.522309	0.679695	0.238121	0.412566	-0.948414
NEMVEDRAFT_v1g204979	A7S0P3	-1.77036	-0.448923	0.232815	0.859514	1.03492	-0.421655	0.16376	-1.20159
NEMVEDRAFT_v1g204986	A7S0Q0	-2.62745	-1.13401	0.6422	1.45219	1.23861	-1.99123	1.03887	-1.20763
NEMVEDRAFT_v1g205088	A7S0X4	1.41469	0.0439753	0.861913	-1.2583	-0.95608	0.682855	0.535163	1.82759
NEMVEDRAFT_v1g205168	A7S127	1.76579	-0.542977	1.49689	-1.54335	0.172788	0.821754	0.212954	1.92115
NEMVEDRAFT_v1g205193	A7S149	-1.71725	-1.38256	-0.834563	1.29405	-0.000278044	-2.00692	-1.05589	-1.8175
NEMVEDRAFT_v1g205207	A7S160	-2.94973	-1.42861	-0.764059	0.327298	0.00254841	-0.358372	-0.588638	-1.83728
NEMVEDRAFT_v1g205229	A7S177	-8.24288	5.62375	-0.109538	-10.8672	-9.0503	2.56154	1.47169	10.5418
NEMVEDRAFT_v1g205230	A7S178	-0.936386	-0.359397	0.200591	0.804163	0.3605	-0.969499	0.629653	-1.21336
NEMVEDRAFT_v1g205273	A7S1B2	-2.97574	-0.153007	-0.306971	0.952057	0.292594	-0.789464	0.119018	-3.49464
NEMVEDRAFT_v1g205373	A7S1J3	-1.35418	0.13208	0.114201	0	0.22181	0	0.727432	0
NEMVEDRAFT_v1g205412	A7S1M9	1.06275	0.260732	0.881072	-1.74919	0.62356	1.58933	0.482128	2.00247
NEMVEDRAFT_v1g205438	A7S1Q1	0.78365	-0.651512	0.317111	-0.113972	0.0962317	-0.331698	0.135623	0.947161
NEMVEDRAFT_v1g205488	A7S1U6	1.42079	-1.51166	1.47257	0.465962	1.28966	-3.2983	0.633201	-0.646589
NEMVEDRAFT_v1g205537	A7S1Y8	1.10391	-0.640007	1.09561	0.209747	0.794893	-1.04957	-0.00184987	0.411144
NEMVEDRAFT_v1g205582	A7S221	-1.6365	-0.400846	-0.270363	0.722047	0.565604	-0.440256	-0.513575	-1.71678
NEMVEDRAFT_v1g205600	A7S239	1.20752	-0.0159727	0.249144	-0.488884	-0.394191	0.337833	-0.772019	1.02874
NEMVEDRAFT_v1g205626	A7S266	-1.256	-0.826395	-0.0797623	0.33903	-0.455212	-1.00724	0.730947	0.0692778
NEMVEDRAFT_v1g205633	A7S270	-1.89534	1.80812	-0.391012	-2.13375	-0.585411	1.8936	0.269353	-0.184234
NEMVEDRAFT_v1g205661	A7S295	0.852718	0.492978	0.830834	-0.433919	0.64133	0.125427	0.079691	0.440072
NEMVEDRAFT_v1g205684	A7S2B6	-0.959139	-0.0856504	-0.598595	0.7116	0.0830512	-0.466583	-1.13643	-1.52555
NEMVEDRAFT_v1g205704	A7S2C9	-1.02919	0.342148	0.135929	0	0.448751	0	0.383317	0
NEMVEDRAFT_v1g205759	A7S2G1	1.05625	-0.227497	0.0318051	-0.605637	-1.10657	0.597514	-0.323128	0.762967
NEMVEDRAFT_v1g205867	A7S2P8	-2.70355	1.49428	-0.296944	-1.11859	-0.303948	0.898129	0.313537	1.40082
NEMVEDRAFT_v1g205876	A7S2Q9	2.35007	-1.8661	2.48771	-2.35949	-0.567913	-0.30519	0.43937	3.9215
NEMVEDRAFT_v1g205904	A7S2S6	1.11556	0.0937706	0.655137	-0.709259	0.316461	0.617959	-0.194741	0.501639
NEMVEDRAFT_v1g205909	A7S2T0	1.75575	0.176638	0.896248	-1.98827	-1.50194	2.11366	-0.659804	1.93391
NEMVEDRAFT_v1g20609	A7RRQ0	-1.06323	-0.258596	-0.158057	0.758149	0.297607	-0.583805	0.0576209	-1.64581
NEMVEDRAFT_v1g206132	A7S3A6	-1.69245	0.366896	0.0794377	-1.27971	0.324121	1.43849	0.560526	-4.98761
NEMVEDRAFT_v1g206164	A7S3C6	0.675098	-0.839305	0.771584	0.729584	0.471319	-0.62439	0.697581	-0.885695
NEMVEDRAFT_v1g206348	A7S3S1	0.973266	-0.179995	0.754561	0	-0.0524269	0	0.637997	0
NEMVEDRAFT_v1g20640	A7S331	-1.15423	0.245304	-0.709426	0.361565	-0.530431	0.038854	-0.410114	-1.15537
NEMVEDRAFT_v1g206412	A7S3Y2	1.75189	-0.59206	-0.579589	-0.402327	-3.01683	1.32619	-1.99409	-0.187468
NEMVEDRAFT_v1g206474	A7S427	0.851921	-0.240605	-0.0638792	0	-0.180754	0	-0.879494	0
NEMVEDRAFT_v1g206632	A7S4E1	-2.57787	0.485862	0.384226	0.862766	0.422079	-0.329658	1.22511	-1.58936
NEMVEDRAFT_v1g206649	A7S4E8	-6.18618	1.49679	0.77886	0.0637725	1.19093	-0.254252	1.39461	-0.96941
NEMVEDRAFT_v1g206784	A7S4R4	-3.23745	-0.807732	-1.09696	0.259063	-0.364101	-0.322877	-0.989143	-1.25897
NEMVEDRAFT_v1g206807	A7S4S8	1.73829	0.0169436	0.237177	-0.265528	-1.44151	0.973479	-1.64121	-0.204247
NEMVEDRAFT_v1g206858	A7S4X2	-1.44272	0.299475	-0.0292097	0.703276	0.245529	-0.128581	0.452648	-1.81239
NEMVEDRAFT_v1g20689	A7SAM8	-0.903424	-0.138617	-0.439479	0	-0.497641	0	0.0171192	0
NEMVEDRAFT_v1g206949	A7S545	-1.01897	0.575345	0	0	0	0	0	0
NEMVEDRAFT_v1g206981	A7S566	-1.31566	0.780559	0.0501777	-0.129439	0.174705	-0.0185347	0.531392	-0.814876
NEMVEDRAFT_v1g207068	A7S5D6	-3.39061	-0.911351	-1.0145	0.913773	-0.303985	-0.887552	-0.793237	-1.2416
NEMVEDRAFT_v1g207102	A7S5G8	-1.5704	-0.744785	0.437542	1.62709	0.186509	-1.56378	1.32503	-3.0717
NEMVEDRAFT_v1g207110	A7S5H5	-1.07346	0.549283	0.671222	-0.41707	1.47462	-0.323105	0.206386	0.281889
NEMVEDRAFT_v1g207149	A7S5K5	-3.12724	-1.28243	0.50756	1.48297	-0.00347318	-2.57492	1.64417	-3.02563
NEMVEDRAFT_v1g207173	A7S5M3	-1.81299	-0.574113	-0.0403792	0.949693	0.543131	-1.18985	0.220122	-1.87245
NEMVEDRAFT_v1g207254	A7S5U1	1.45403	-0.440193	-0.111642	-0.960886	-0.690992	0.770712	-1.4212	1.51806
NEMVEDRAFT_v1g207283	A7S5W4	2.89766	-2.98342	3.17952	-2.09637	-0.77237	0.170975	2.24967	3.08694
NEMVEDRAFT_v1g207311	A7S5Y5	-3.63845	-0.31029	0.554262	1.54357	1.20399	-2.92169	0.982486	-2.07003
NEMVEDRAFT_v1g207415	A7S663	2.34973	-1.5568	0.786712	0.0538569	-0.888701	-1.59146	-1.16262	1.07235
NEMVEDRAFT_v1g20744	A7RUQ2	-2.39139	-0.188927	-0.830193	-0.138311	-0.444374	-0.790214	-0.358427	-0.848584
NEMVEDRAFT_v1g207545	A7S6H1	-2.47284	-0.991738	-1.21377	0.999917	-1.53969	0.153782	-0.318494	-1.05829
NEMVEDRAFT_v1g207576	A7S6I7	-4.24224	-0.256591	-0.0968102	-0.907356	0.750545	1.39904	0.0738618	-1.61813
NEMVEDRAFT_v1g207596	A7S6K3	-3.43653	0.306833	0.305112	0.988121	0.557925	-2.11535	1.08129	-1.80409
NEMVEDRAFT_v1g207840	A7S735	1.50944	0.926141	0.735108	-1.8802	-0.490386	0.842919	-0.904224	0.972271
NEMVEDRAFT_v1g207856	A7S750	-1.0253	-0.326773	-0.052579	0	0.415549	0	0.0483475	0
NEMVEDRAFT_v1g207870	A7S764	1.32834	-0.261811	-0.0496766	-0.981788	-1.60516	1.00503	-0.746739	1.4766
NEMVEDRAFT_v1g207873	A7S768	1.09689	-0.657538	0.562046	0.115899	0.597514	-1.12619	-0.300871	-0.373319
NEMVEDRAFT_v1g207879	A7S774	-2.65198	-0.380351	2.70975	2.58731	3.58019	-3.82144	2.73816	-4.31627
NEMVEDRAFT_v1g207930	A7S7B3	1.52242	0.548904	1.15568	-0.788541	0.16812	0.883439	-0.248412	0.153304
NEMVEDRAFT_v1g207953	A7S7E3	1.55845	0.0438391	-0.292208	-0.549205	-3.05316	0.812216	-0.998312	1.22634
NEMVEDRAFT_v1g207958	A7S7E7	-5.8062	1.61377	-1.31244	-2.00116	-1.25722	-0.910174	-0.472346	3.27683
NEMVEDRAFT_v1g207973	A7S7G4	1.1526	-0.0291668	0.631252	-0.3155	-0.0169985	-0.00754936	-0.326049	0.954243
NEMVEDRAFT_v1g207979	A7S7H1	-4.79073	-0.896041	-0.238725	2.53052	0.213512	-2.39154	0.436873	-3.28828
NEMVEDRAFT_v1g207993	A7S7I0	-1.04138	0.20054	0.197295	0	0.639935	0	0.430871	0
NEMVEDRAFT_v1g208115	A7S7T2	-2.23552	0.0227739	-0.0699226	0.31211	0.188449	0.280105	0.556219	-1.84046
NEMVEDRAFT_v1g208133	A7S7U5	-1.75601	0.483226	-1.51659	0.0863622	-2.14057	0.420749	-0.755276	-1.01125
NEMVEDRAFT_v1g208177	A7S7Y5	-1.07079	-0.432639	-1.3401	0.301001	-1.35014	0.264246	-1.13014	-0.786942
NEMVEDRAFT_v1g208197	A7S803	-0.772545	0.198871	0.165829	0.480676	0.441754	-0.588883	0.4489	-0.395679
NEMVEDRAFT_v1g208204	A7S807	3.07708	-0.667074	3.30853	-1.15797	0.544105	1.08647	-0.503586	1.1664
NEMVEDRAFT_v1g208260	A7S847	-0.874586	0.556779	-0.270249	0.170912	-0.00468532	0.131625	-0.0326248	-0.886307
NEMVEDRAFT_v1g208268	A7S855	1.80578	-0.475658	1.41681	-1.12129	0.918734	1.37677	0.574653	1.38301
NEMVEDRAFT_v1g208351	A7S8B9	1.6991	-0.289488	1.9378	-1.0551	0.532009	0.745223	1.3585	1.70198
NEMVEDRAFT_v1g208415	A7S8H6	-4.14267	2.85696	-1.79782	-1.98119	-1.71637	1.75463	-0.995906	1.93147
NEMVEDRAFT_v1g208427	A7S8I5	-1.2213	0.316469	0.522307	0.506976	0.882486	-0.961862	0.893778	-0.566396
NEMVEDRAFT_v1g208460	A7S8L4	1.90144	0.816588	-0.117125	-1.07153	-1.62972	0.0352068	-2.54166	-0.579621
NEMVEDRAFT_v1g208522	A7S8R2	-2.74173	0.58491	0.273752	0.203799	0.226582	1.30821	1.16442	-1.34636
NEMVEDRAFT_v1g208676	A7S939	1.50922	0.0474666	-0.112648	-1.48537	-1.97207	1.25927	-1.25424	2.10527
NEMVEDRAFT_v1g208719	A7S971	2.01696	-1.12957	1.63249	-0.038514	-0.159722	-1.51836	-1.32059	-0.150621
NEMVEDRAFT_v1g208725	A7S975	-2.52913	-1.1126	0.325788	1.01744	0.385138	-0.502604	1.13906	-2.13058
NEMVEDRAFT_v1g208854	A7S9J1	-0.734054	0.0691379	-0.613582	0	-0.415232	0	-0.583779	0
NEMVEDRAFT_v1g208887	A7S9L3	1.71436	-0.399231	1.26537	-0.49923	0.189446	-0.154209	-0.780818	-0.617844
NEMVEDRAFT_v1g208913	A7S9N5	1.81132	-0.491124	0.471135	-0.448673	-0.510394	1.25949	-0.503581	-0.196477
NEMVEDRAFT_v1g208963	A7S9S1	-0.687516	0.143557	-0.219537	0	-0.457062	0	0.243311	0
NEMVEDRAFT_v1g209028	A7S9X3	-4.94111	0.649141	-0.765341	0	-0.593437	0	-0.0560014	0
NEMVEDRAFT_v1g209082	A7SA25	-2.44079	0.213417	-0.0874372	0.266343	0.689778	-0.134539	0.0516753	-1.71959
NEMVEDRAFT_v1g209120	A7SA51	-1.35669	-0.710517	-0.265865	0.563451	0.348129	-1.33767	-0.262693	-0.0925165
NEMVEDRAFT_v1g209121	A7SA52	-0.743789	-0.548654	-0.330425	0.111448	-0.362583	-0.403452	-0.0203311	0.0510597
NEMVEDRAFT_v1g209128	A7SA62	1.85598	-0.83542	-0.160854	-1.32376	-2.37456	1.08973	-0.989091	1.32565
NEMVEDRAFT_v1g209170	A7SA98	-1.41315	-0.913063	-0.692073	0.618607	-0.483174	-0.31224	-0.235433	-2.14064
NEMVEDRAFT_v1g209299	A7SAK4	-3.04437	0.937144	-0.697256	-1.90883	-0.153563	1.53177	-0.382153	-1.22021
NEMVEDRAFT_v1g209351	A7SAQ7	2.71142	0.20768	1.74154	-2.6192	-2.17846	2.43734	-0.0561142	2.50541
NEMVEDRAFT_v1g209355	A7SAR0	-1.01073	0.853727	-0.921284	-1.23281	-0.424301	-0.522773	-1.1297	2.11723
NEMVEDRAFT_v1g209418	A7SAV2	1.7155	-0.196292	0.0207178	-0.785242	-1.53295	0.363228	-1.58756	1.57724
NEMVEDRAFT_v1g209450	A7SAX5	-1.51346	0.00891042	1.3181	0.212684	1.98609	-0.895796	1.38868	-0.592055
NEMVEDRAFT_v1g209494	A7SB02	-2.79026	1.40691	0.516913	0.448205	-0.210242	0.372934	1.69705	-2.57066
NEMVEDRAFT_v1g209643	A7SBC1	-3.91597	0.766477	2.17256	1.09037	2.73969	-2.58625	2.70214	-1.91114
NEMVEDRAFT_v1g209661	A7SBD6	-1.25869	-0.773583	0.0946353	0.46289	0.330999	-1.11579	0.575339	-1.24516
NEMVEDRAFT_v1g209768	A7SBN1	-4.11756	-0.225977	0.728157	1.76939	1.32444	-1.93359	1.24099	-2.65223
NEMVEDRAFT_v1g209831	A7SBS0	-1.83767	-0.305443	0.0126327	1.19098	0.499077	-0.815386	0.399555	-1.81983
NEMVEDRAFT_v1g209974	A7SC28	0.824388	-1.40494	-0.0585356	0.801217	-0.244683	-1.66208	-1.03045	-0.558555
NEMVEDRAFT_v1g210164	A7SCJ8	3.67064	-4.63729	4.07838	1.15604	3.94461	-4.14543	0	-0.678039
NEMVEDRAFT_v1g210189	A7SCL7	1.33889	-0.232992	0.603282	0	-0.106949	0	-0.852304	0
NEMVEDRAFT_v1g210240	A7SCR1	3.04576	-1.87375	0.210241	1.29185	-0.834486	-1.01683	-5.64629	-0.126913
NEMVEDRAFT_v1g210265	A7SCS6	0.90041	-0.51778	0.571504	-0.335135	0.468953	0.73324	0.133845	0.419876
NEMVEDRAFT_v1g210358	A7SD07	2.15499	-1.18741	0.498213	-0.839362	-1.52642	1.28832	-0.14078	0.145204
NEMVEDRAFT_v1g210373	A7SD21	0.753758	-0.101182	0.603424	-0.423773	0.466561	0.649164	0.363036	0.805839
NEMVEDRAFT_v1g210412	A7SD43	-1.71832	-1.35351	0.171713	1.54245	1.05707	-3.2696	-0.153738	-2.37961
NEMVEDRAFT_v1g210516	A7SDB3	1.29585	-1.03777	0.419769	-1.47244	-0.574564	0.549948	-0.360867	2.28382
NEMVEDRAFT_v1g210665	A7SDN2	2.78504	-4.48642	0	2.67239	0	-4.25469	0	-3.81203
NEMVEDRAFT_v1g21070	A7S887	-0.844957	-0.438874	-0.0372889	1.28922	0.576155	-1.70855	-0.223188	-1.60012
NEMVEDRAFT_v1g210739	A7SDV0	-1.19301	-0.0110333	0.18502	0.646341	0.488245	-0.594443	0.581702	-1.20638
NEMVEDRAFT_v1g210741	A7SDV2	-1.5144	-0.938399	0.285999	1.0378	1.01169	-1.52344	0.347282	-1.89425
NEMVEDRAFT_v1g210772	A7SDX9	-1.66015	-1.15512	-0.0422917	1.02631	0.641888	-1.9188	0.0601227	-0.968118
NEMVEDRAFT_v1g210816	A7SE14	-2.95585	-2.33323	2.96904	0.434485	3.91799	-0.745034	2.94301	-0.679346
NEMVEDRAFT_v1g210849	A7SE41	-1.22576	0.584147	-0.331075	-0.123699	0.28678	0.460219	-0.280693	-0.580286
NEMVEDRAFT_v1g210850	A7SE42	-4.22761	-2.6218	1.97203	-4.04395	3.10708	4.19453	1.24639	-1.34044
NEMVEDRAFT_v1g210858	A7SE48	-1.31274	-0.929821	0.86993	1.6847	1.20459	-2.00318	1.30502	-2.06388
NEMVEDRAFT_v1g210880	A7SE61	-8.19797	-4.98572	5.22379	-5.79029	6.78738	5.97933	0.233354	-2.55204
NEMVEDRAFT_v1g210882	A7SE63	-1.70215	-0.385908	-0.421035	0.836826	-1.02129	-0.952979	0.547459	-2.0594
NEMVEDRAFT_v1g210927	A7SEA2	-1.30327	-0.391576	-0.0451074	0.134385	0.732029	-0.46191	-0.262722	-0.446762
NEMVEDRAFT_v1g210983	A7SEF0	1.06463	-0.680456	0.537912	0.0350613	-0.366129	-1.03566	0.483346	-0.159444
NEMVEDRAFT_v1g210990	A7SEG1	-1.461	-0.578672	0.634538	0.922294	1.51425	-1.23163	0.261565	-0.874812
NEMVEDRAFT_v1g211081	A7SEM2	-1.88652	0.421864	-1.12762	0.457757	-0.426882	-0.0486893	-1.11208	-0.911424
NEMVEDRAFT_v1g211086	A7SEM6	-1.22543	0.551476	0.717191	0.378944	1.03246	-1.11463	1.05335	-0.318745
NEMVEDRAFT_v1g211193	A7SEV6	0.952634	-0.0444019	0.0311207	-0.151582	-0.843033	0.628597	-0.321963	0.17488
NEMVEDRAFT_v1g211211	A7SEX0	0.982967	-0.703243	0.235311	-0.954653	-0.540602	0.50432	-0.103902	1.78306
NEMVEDRAFT_v1g211253	A7SEZ5	-1.56302	-1.25784	-0.745815	0.9771	-0.0429399	-1.43993	-0.793265	-1.1455
NEMVEDRAFT_v1g211300	A7SF33	-1.87306	-0.559013	0.516221	0.31318	0.60009	-0.640485	1.2602	-0.294134
NEMVEDRAFT_v1g211305	A7SF38	1.02378	-0.445708	-0.331828	0.669693	-1.56731	-0.219525	-0.718558	-0.606691
NEMVEDRAFT_v1g211309	A7SF44	1.4273	-0.217026	0.433638	-1.37169	-0.612942	1.41127	-0.901475	1.72627
NEMVEDRAFT_v1g211310	A7SF45	1.57351	-0.0150511	-0.241694	-0.543719	-1.63588	0.449362	-2.30126	0.656549
NEMVEDRAFT_v1g211321	A7SF55	1.42573	-0.297497	1.20992	-1.61669	-0.303939	0.704039	0.439823	2.25963
NEMVEDRAFT_v1g211340	A7SF72	-1.00139	0.571036	0	-2.00127	0	0.946122	0	1.90632
NEMVEDRAFT_v1g211371	A7SF91	-1.07633	-0.350932	-0.657166	0.422599	-0.755551	-0.313708	-0.0612636	-0.749402
NEMVEDRAFT_v1g211508	A7SFK0	-1.93845	-0.877143	-0.0644453	0.668773	0.215639	-0.452715	0.541001	-1.04415
NEMVEDRAFT_v1g21184	A7S2D4	-2.0089	-0.486766	-0.184156	1.08142	0.640737	-1.62897	-0.280789	-1.78536
NEMVEDRAFT_v1g211848	A7SGB4	-1.91755	-0.316227	0.0446007	0.877267	0.32881	-0.283424	0.650039	-0.868717
NEMVEDRAFT_v1g211860	A7SGC2	-0.780595	0.488097	-0.25251	-0.579918	-0.156307	0.605709	-0.0232284	0.328755
NEMVEDRAFT_v1g211889	A7SGE4	-3.29444	-0.477926	-0.280311	-0.995224	-0.414995	-0.378994	0.574393	-2.87523
NEMVEDRAFT_v1g211927	A7SGH4	1.10617	-0.37585	0.409689	0.189778	-0.300824	-0.699069	0.0464381	0.477934
NEMVEDRAFT_v1g211957	A7SGJ5	0.816402	-0.346527	0.516746	0	0.341398	0	0.141675	0
NEMVEDRAFT_v1g211995	A7SGL9	-3.1549	2.77805	0.24874	-2.52928	0.382006	2.84135	0.950179	1.64897
NEMVEDRAFT_v1g212030	A7SGP8	-0.62008	-1.57244	0.153002	1.32308	0.597946	-2.11675	0.0600366	-1.80251
NEMVEDRAFT_v1g212089	A7SGV8	1.4247	-0.725005	0.885755	0.429563	-0.690985	-0.363677	0.900822	-2.06817
NEMVEDRAFT_v1g212103	A7SGW9	-0.984537	0.234699	-0.776933	-0.195516	-1.11381	0.208868	-0.305046	-0.801604
NEMVEDRAFT_v1g212119	A7SGY4	1.68129	-0.0372609	-0.172987	-2.29033	-1.1854	1.87466	-2.46315	3.07403
NEMVEDRAFT_v1g212165	A7SH09	2.08053	-1.2768	0.669235	0	-0.303886	0	-0.86612	0
NEMVEDRAFT_v1g212177	A7SH20	-1.36116	-0.866311	-0.498535	1.16946	-0.139445	-1.89006	-0.145448	-2.62205
NEMVEDRAFT_v1g21219	A7SBA4	1.02631	-0.303868	0.298315	-0.788216	-0.549955	0.0863038	-0.26272	1.55012
NEMVEDRAFT_v1g212291	A7SHB9	1.61935	0.321078	0.515684	-0.37073	-1.04096	-0.371234	-0.623955	0.982103
NEMVEDRAFT_v1g212306	A7SHD2	-1.55364	-0.673779	0.0135154	0.796665	0.242887	-1.2259	0.585498	-1.71484
NEMVEDRAFT_v1g212337	A7SHG0	0.623337	-0.111897	0.683961	0.2434	0.491145	-0.773313	0.448321	-0.0258392
NEMVEDRAFT_v1g212469	A7SHR9	-1.36594	-0.857926	-1.08293	0.655716	-0.894768	-1.22379	-0.728055	-0.781242
NEMVEDRAFT_v1g212496	A7SHU2	-2.41855	-0.880674	0.216523	1.26258	0.360382	-1.2755	0.998583	-2.04426
NEMVEDRAFT_v1g212512	A7SHV4	-2.20896	0.98634	0.651735	-1.46254	0.831325	1.41133	1.30897	-0.410413
NEMVEDRAFT_v1g212513	A7SHV5	-1.57187	1.37624	-0.357973	-2.63773	-0.822474	2.73804	0.25488	1.15713
NEMVEDRAFT_v1g212534	A7SHX3	-7.25765	1.8915	0.354111	0.0030825	0.809012	0.191126	1.03592	-1.91674
NEMVEDRAFT_v1g212543	A7SHY0	-1.13084	0.154212	0.289859	-0.385179	0.445814	0.729368	0.846614	0.393955
NEMVEDRAFT_v1g212606	A7SI34	1.51789	-1.67272	0.301932	-0.305513	-0.501355	-0.025755	-0.239585	0.787024
NEMVEDRAFT_v1g212623	A7SI46	1.05017	-0.650427	0.488001	-0.579174	0.441875	-0.571049	-0.417541	1.25014
NEMVEDRAFT_v1g212694	A7SI97	-1.00109	0.0113623	-0.33898	0.480721	0.128931	0.396931	-0.18126	-1.03474
NEMVEDRAFT_v1g212709	A7SIA9	-1.11343	0.0213601	-0.207475	0	0.481525	0	-0.373108	0
NEMVEDRAFT_v1g212723	A7SIC2	-1.06175	-0.107393	0.468551	0.383236	0.693603	-1.44216	0.844414	-0.137335
NEMVEDRAFT_v1g212746	A7SIE2	-2.24558	0.569186	0.00781549	0.0141172	1.02583	-0.232862	-0.668744	-1.64461
NEMVEDRAFT_v1g212771	A7SIG4	2.02375	-0.419204	1.51321	-1.11198	0.0147159	0.200889	-0.379514	1.8888
NEMVEDRAFT_v1g212847	A7SIM3	-3.1405	0.152363	1.82424	0.680112	2.38066	-1.17606	2.31029	-1.98468
NEMVEDRAFT_v1g212944	A7SIU7	-2.27596	0.532018	0.495179	1.31408	0.900115	-2.44905	0.953582	-1.94272
NEMVEDRAFT_v1g212991	A7SIY0	1.198	-0.294523	0.217473	-1.33998	-1.00019	0.914091	-0.466968	2.10052
NEMVEDRAFT_v1g212999	A7SIY9	-2.59536	0.410276	0.0949673	-1.52636	0.439201	-0.4032	0.747275	0.611305
NEMVEDRAFT_v1g213018	A7SJ03	-9.8456	3.01752	0.949011	-6.52518	-6.4539	1.99046	2.53063	7.80083
NEMVEDRAFT_v1g213101	A7SJ72	-1.05528	0.185079	-0.801988	0.234008	-0.863743	-0.262831	-0.343266	-1.24156
NEMVEDRAFT_v1g213102	A7SJ73	0.762971	-0.453379	0.991252	0.529637	0.673393	-0.53378	0.74531	-0.905783
NEMVEDRAFT_v1g213126	A7SJ90	1.49763	0.449567	0.332388	-1.62982	-1.06073	1.06663	-1.36353	2.88786
NEMVEDRAFT_v1g213136	A7SJA0	-2.5372	-1.76888	3.37112	1.57445	4.10372	-1.57156	3.62115	-1.51606
NEMVEDRAFT_v1g213154	A7SJB9	-1.62367	0.360394	0.582186	0	0.590781	0	1.29911	0
NEMVEDRAFT_v1g213202	A7SJG2	2.2602	-1.1366	0.710432	-1.91801	-1.54796	0.84154	-0.7861	3.34765
NEMVEDRAFT_v1g213218	A7SJH5	1.73275	-1.47322	0.0533166	0.091236	-0.529301	-1.97246	-1.52126	-0.307459
NEMVEDRAFT_v1g213261	A7SJL3	1.19203	-1.29041	1.13751	-0.280988	0.88641	-0.716658	0.400764	1.311
NEMVEDRAFT_v1g21340	A7RX81	1.54801	0.218243	0.999831	-0.904301	-0.303963	0.340989	-0.59989	0.143676
NEMVEDRAFT_v1g213489	A7SK33	0.947882	0.110211	0.371165	-0.911897	-0.192731	0.771649	-0.19797	1.21915
NEMVEDRAFT_v1g213542	A7SK68	-5.7642	-0.0670524	1.60757	1.21486	-0.666498	-1.00135	3.06834	-6.08845
NEMVEDRAFT_v1g213638	A7SKE4	-1.41275	-0.749375	0.0412026	1.80858	0.544054	-1.70413	0.286599	-2.31896
NEMVEDRAFT_v1g213661	A7SKG0	-1.50645	-0.0665143	-0.766401	-0.111669	-0.529868	0.792265	-0.546137	0.894883
NEMVEDRAFT_v1g213735	A7SKM4	-1.10105	0.80634	-0.630024	-0.636657	-0.148152	1.05513	-0.545514	0.514247
NEMVEDRAFT_v1g213814	A7SKR5	4.50023	-3.98598	3.63066	0	2.71966	0	0	0
NEMVEDRAFT_v1g214071	A7SLD5	-1.30884	0.501135	0.0631874	0.297403	0.440497	-0.290085	0.369088	-2.13057
NEMVEDRAFT_v1g214094	A7SLF8	1.25408	-0.107405	0.518038	-0.933204	-0.473037	0.440446	-0.112019	1.81545
NEMVEDRAFT_v1g214129	A7SLI1	-2.02844	1.05199	-0.561433	-1.8312	-0.725142	1.65182	0.0873475	0.397204
NEMVEDRAFT_v1g214159	A7SLK5	-1.89791	-0.779799	0.0963225	1.63648	0.725517	-1.33367	0.369512	-2.89707
NEMVEDRAFT_v1g214207	A7SLN7	-2.36883	-1.32535	0.528686	0.190074	-0.424256	-1.04824	1.67278	-0.605733
NEMVEDRAFT_v1g214211	A7SLP1	-1.94682	-0.299648	0.0637687	0.180763	-0.97141	-0.0343373	1.11656	-1.80494
NEMVEDRAFT_v1g214234	A7SLQ4	0.944785	0.39074	0.414699	-0.891068	-0.0486896	1.47245	-0.100296	0.440942
NEMVEDRAFT_v1g214316	A7SLX3	-3.43823	1.47213	-0.047401	-2.14711	-0.304001	1.64578	0.975229	0.555207
NEMVEDRAFT_v1g214346	A7SM04	-2.84756	-0.460105	1.3841	-1.18997	1.30007	0.868984	2.32653	-2.78187
NEMVEDRAFT_v1g214361	A7SM14	-1.47806	-1.00978	1.09679	1.91244	0.639478	-2.73681	2.04766	-1.56674
NEMVEDRAFT_v1g214505	A7SME3	-3.42142	-0.298638	0.764064	1.66475	1.62342	-2.18359	0.897908	-2.57578
NEMVEDRAFT_v1g214570	A7SMK2	-0.886394	0.105929	0.512605	0.431913	0.603861	-0.517643	0.957014	-0.603275
NEMVEDRAFT_v1g214573	A7SMK5	-1.41186	-0.753246	-0.0336957	1.02856	0.317958	-1.91253	0.40262	-2.48939
NEMVEDRAFT_v1g214575	A7SMK7	-1.48597	0.0324342	-0.299239	0.536018	0.223675	-0.397312	-0.14113	-2.01717
NEMVEDRAFT_v1g214620	A7SMP6	-1.45032	-0.300164	0.373064	0.468789	0.721774	-1.31301	0.756759	-0.402625
NEMVEDRAFT_v1g214798	A7SN30	1.08242	0.013861	0.0657449	-1.04385	-0.487054	0.932338	-0.914913	1.5027
NEMVEDRAFT_v1g214852	A7SN79	-5.19688	1.55202	0.608689	0.306783	1.59465	-0.615892	0.560817	-3.93704
NEMVEDRAFT_v1g214900	A7SNC8	2.05593	-0.36912	1.21583	-2.65683	0.0868384	1.93725	-0.162639	2.18388
NEMVEDRAFT_v1g214923	A7SNE3	1.53725	-1.14548	0.74016	-0.582281	-0.446592	-0.604547	-0.609322	1.03181
NEMVEDRAFT_v1g214936	A7SNF7	-1.69616	0.176421	-0.402506	0.948976	-0.0781013	-1.13869	0.0565891	-2.1232
NEMVEDRAFT_v1g215021	A7SNM9	-2.63202	-0.0799107	2.30578	1.35098	2.9574	-3.59872	2.6086	-1.68903
NEMVEDRAFT_v1g215051	A7SNQ1	1.09808	0.396031	0.172081	-1.05065	-0.895258	0.705506	-0.352974	1.17359
NEMVEDRAFT_v1g215101	A7SNU7	0.836801	0.167834	1.11605	-0.43257	0.693444	0.413021	0.950533	0.735107
NEMVEDRAFT_v1g215116	A7SNV9	-1.29295	0.147807	-0.478336	0.0854306	-0.33984	0.82908	-0.0258932	-1.12659
NEMVEDRAFT_v1g215175	A7SP00	-3.13931	-0.0696337	-1.10138	-0.711176	-1.12712	0.492585	-0.503649	-0.919206
NEMVEDRAFT_v1g215228	A7SP41	-1.94156	0.981989	1.22715	0.244318	1.34265	0.407558	1.99092	-0.53281
NEMVEDRAFT_v1g215256	A7SP61	-2.17292	-0.331777	-0.563271	0.452074	-0.715945	-1.72034	0.331638	-1.58272
NEMVEDRAFT_v1g215383	A7SPE9	-3.49878	0.396813	-1.66596	-0.0595331	-1.04102	-0.251463	-1.30947	-1.43518
NEMVEDRAFT_v1g215418	A7SPH9	2.22836	0.164833	1.99291	-1.06332	-0.834472	0.510894	-1.03416	1.19119
NEMVEDRAFT_v1g21542	A7SLH4	-0.776872	-0.102424	-0.133649	-0.340306	0.113819	0.368392	-0.00574568	-0.757102
NEMVEDRAFT_v1g215457	A7SPK9	-2.03679	-1.71734	-0.878807	0.279997	-0.114789	-1.55423	-0.903542	-1.48785
NEMVEDRAFT_v1g215518	A7SPQ2	-2.1693	-0.404577	0.924895	-0.175417	0.60351	0.302323	1.92678	-1.27904
NEMVEDRAFT_v1g215544	A7SPS2	1.61129	-0.754959	1.0354	-1.35371	-1.15195	1.73661	0.414021	0.521779
NEMVEDRAFT_v1g215547	A7SPS5	-3.26487	1.05987	0.83577	0.432339	1.24406	-0.426751	1.47218	-0.822119
NEMVEDRAFT_v1g215562	A7SPT2	-2.5395	-0.761616	-0.884429	1.13341	-1.10661	-1.91897	-0.0182713	-0.578859
NEMVEDRAFT_v1g215590	A7SPV3	-1.88529	-0.418697	0.726727	1.47704	0.733554	-3.41659	1.35699	-1.78963
NEMVEDRAFT_v1g215690	A7SQ56	0.849759	0.298122	0.10754	-0.49494	-0.482293	-0.0241912	-0.384142	1.18579
NEMVEDRAFT_v1g215715	A7SQ79	-1.3817	0.394794	-0.161055	-0.752132	0.3153	0.941137	-0.114929	-0.731877
NEMVEDRAFT_v1g215719	A7SQ82	-1.61422	0.337525	0.506858	0.6815	1.30646	-1.91346	0.137843	-0.516738
NEMVEDRAFT_v1g2158	A7SZF8	-4.41136	-1.42393	0.596407	2.22849	1.11	-3.48878	1.21067	-3.24481
NEMVEDRAFT_v1g215929	A7SQQ6	-3.88631	-0.558033	-0.188304	1.94157	0.509909	-2.32013	0.183827	-4.41382
NEMVEDRAFT_v1g215948	A7SQS1	1.35314	-0.251586	1.1687	0.0446306	0.896403	-1.59861	-0.105126	-0.371543
NEMVEDRAFT_v1g215972	A7SQU1	-1.64356	0.848469	-0.434121	-0.523326	-0.219102	-0.305418	0.046845	0.524174
NEMVEDRAFT_v1g216045	A7SQZ5	2.3003	-0.0241089	2.18909	-1.89143	-0.690986	0.82217	2.15056	-0.683055
NEMVEDRAFT_v1g216057	A7SR06	-1.47654	0.3354	0.557651	0.128319	0.1795	-0.166712	1.47394	-1.86313
NEMVEDRAFT_v1g216115	A7SR42	-0.967508	0.313245	-0.190411	-0.933866	-0.161628	0.560514	0.126844	0.0596274
NEMVEDRAFT_v1g216187	A7SR89	-1.11103	-0.401345	1.10565	0.334719	1.72813	0.0769685	1.13221	-0.670011
NEMVEDRAFT_v1g216254	A7SRE1	2.08968	-0.390867	1.21601	-1.58804	-1.18333	1.05595	-0.14848	2.45945
NEMVEDRAFT_v1g216329	A7SRJ0	0.886873	0.0393348	0.885843	-0.725788	0.29893	0.0860704	0.543989	1.21705
NEMVEDRAFT_v1g216457	A7SRU2	3.32021	-0.887236	3.17974	0	-3.33042	0	2.16002	0
NEMVEDRAFT_v1g21646	A7S0S6	0.754059	0.0506531	0.524679	-0.824808	0.181471	-0.087637	0.132164	1.71212
NEMVEDRAFT_v1g216577	A7SS23	-1.16714	-0.718558	0.0960603	0.576858	0.196329	-1.49516	0.668722	-0.64922
NEMVEDRAFT_v1g216596	A7SS34	2.93252	-1.18327	0.11562	-2.00903	-1.68273	-3.1353	-2.61934	4.42222
NEMVEDRAFT_v1g216776	A7SSJ2	0.892062	-0.350884	0.0380473	-0.476705	0.112035	0.456309	-0.689091	1.54052
NEMVEDRAFT_v1g216887	A7SSR6	1.21093	-1.09017	0.55247	1.27915	-0.303932	-1.28004	0.28491	-1.77052
NEMVEDRAFT_v1g216997	A7SSY9	-2.19371	-0.514961	0.632709	0.961285	1.1499	-1.22331	0.995257	-1.11527
NEMVEDRAFT_v1g217041	A7ST17	-1.59535	-1.90336	0.614309	1.54859	1.03404	-2.19001	1.05719	-1.19989
NEMVEDRAFT_v1g217043	A7ST19	1.05213	-0.540142	1.17933	-0.344869	1.14487	0.0466578	0.661948	0.839183
NEMVEDRAFT_v1g217159	A7STA9	2.10569	-0.298453	0.842925	-2.41946	-1.79879	2.55573	-1.99848	2.08967
NEMVEDRAFT_v1g217186	A7STC3	1.34113	-0.508322	0.54351	0.0678381	-0.391268	-1.14712	-0.704609	0.37008
NEMVEDRAFT_v1g217379	A7STS1	1.34197	-0.745478	-0.196153	-0.404851	-1.11285	0.31231	-0.786776	0.930686
NEMVEDRAFT_v1g217387	A7STS6	-0.905114	-0.596081	0.133242	1.12068	0.0612678	-1.64578	0.722996	-1.15417
NEMVEDRAFT_v1g217560	A7SU68	0.998244	-1.04542	-0.235383	-0.628598	-0.631164	0.286033	-0.884325	1.2271
NEMVEDRAFT_v1g217724	A7SUK8	0.993815	-0.492208	0.48634	0.946018	0.498626	-1.7454	-0.644552	-0.584593
NEMVEDRAFT_v1g217727	A7SUL0	-1.35062	-1.25588	-0.145898	1.20526	0.151406	-1.31797	0.280102	-2.11784
NEMVEDRAFT_v1g21775	A7S7W3	-1.64565	0.258559	-0.917481	-0.527628	-1.7687	0.850585	-0.0730548	-0.912649
NEMVEDRAFT_v1g217910	A7SV20	1.05084	-0.373655	0.479889	-0.358016	0.0315392	-0.11777	0.220323	0.938858
NEMVEDRAFT_v1g218029	A7SVB5	-1.79017	-0.62103	-0.392568	0.900647	0.0932157	-0.681038	-0.0594101	-2.21718
NEMVEDRAFT_v1g21809	A7SLM8	1.18497	0.0273444	0.69828	-0.714129	0.216914	0.977462	-0.0729956	1.0292
NEMVEDRAFT_v1g218100	A7SVH0	1.18965	-0.242946	-0.270943	-1.02299	-0.776064	1.84519	-1.84253	0.615873
NEMVEDRAFT_v1g218117	A7SVI9	1.31594	-1.22026	0.344198	-0.459777	-0.379814	-0.132981	-0.27424	1.12747
NEMVEDRAFT_v1g218119	A7SVJ1	1.46031	0.0250881	0.0867512	-1.82396	-1.32571	1.66816	-1.07795	2.89326
NEMVEDRAFT_v1g218204	A7SVP8	-4.00947	-1.61294	-0.597643	1.61424	-0.484579	-3.25763	0.290618	-3.18815
NEMVEDRAFT_v1g218233	A7SVR9	-1.26403	0.373376	0.00930082	0	-0.558684	0	0.939549	0
NEMVEDRAFT_v1g21829	A7SCQ4	1.03319	-0.828503	1.66637	-0.0304579	1.2742	-0.885198	1.65371	0.665856
NEMVEDRAFT_v1g218290	A7SVV8	2.96589	-2.74697	-0.343573	-0.908909	-2.315	-1.34595	-5.23721	3.33033
NEMVEDRAFT_v1g218669	A7SWQ5	-5.24946	0.0442218	1.77503	1.82702	2.37951	-3.01927	2.31512	-2.92959
NEMVEDRAFT_v1g218670	A7SWQ6	-3.87676	-0.613684	1.27429	1.76643	1.92703	-2.61227	1.71496	-3.38645
NEMVEDRAFT_v1g218740	A7SWV2	3.34732	-2.58749	1.5198	-0.0768059	-2.20298	-2.75576	-1.01117	1.05126
NEMVEDRAFT_v1g218745	A7SWV4	2.72019	-2.60371	2.27795	-2.20725	-0.550147	-1.32719	-1.19125	3.80002
NEMVEDRAFT_v1g218748	A7SWV7	5.52088	-6.88949	3.05356	-1.14716	-3.23293	-2.94503	-5.9107	2.79279
NEMVEDRAFT_v1g218832	A7SX23	-1.30293	0.760889	0.033335	0.341915	0.827681	-0.470648	-0.265209	-1.09231
NEMVEDRAFT_v1g218898	A7SX76	6.7655	-5.49395	4.78358	3.87965	0	-4.99538	0	-4.55272
NEMVEDRAFT_v1g218920	A7SX91	-1.85104	1.01235	-0.133892	-0.12328	0.0709532	-0.292961	0.414936	0.32909
NEMVEDRAFT_v1g218982	A7SXD7	1.50207	-0.0493759	1.84693	-1.16031	0.20095	0.359491	1.27854	1.2596
NEMVEDRAFT_v1g219120	A7SXN4	-1.40769	0.0302264	-0.543177	0.604096	-0.59505	-0.400458	0.132545	-0.828675
NEMVEDRAFT_v1g219165	A7SXR1	-0.984363	-1.35277	-0.517914	1.85836	0.09694	-2.62044	-0.733433	-1.79861
NEMVEDRAFT_v1g219233	A7SXV9	-3.94109	-4.06963	4.42037	-1.38641	4.74064	0.223631	5.13075	-5.9055
NEMVEDRAFT_v1g219316	A7SY19	-4.67773	0.912133	0.0299346	1.7119	-0.894276	-8.50753	1.30819	-0.691681
NEMVEDRAFT_v1g219321	A7SY24	1.02766	0.071675	1.13884	-0.738081	-0.0769714	-0.775461	1.22095	1.61083
NEMVEDRAFT_v1g219346	A7SY39	-5.0524	0.184798	-4.04712	0.193963	-2.50576	-6.02798	-6.46962	-0.683852
NEMVEDRAFT_v1g219438	A7SYB6	1.48489	-0.391183	0.684191	-0.753944	-0.202687	0.4758	-0.402408	1.47613
NEMVEDRAFT_v1g219591	A7SYN6	1.46843	-0.740198	1.33199	-0.804071	0.352694	-0.416146	0.87275	1.72612
NEMVEDRAFT_v1g219712	A7SYX6	-1.71878	-0.358896	-0.58401	0.125102	0.2375	-0.242966	-0.786912	-1.25422
NEMVEDRAFT_v1g219789	A7SZ24	2.35266	0.642733	2.25022	-1.33783	0.0830973	-0.669127	0.0438733	2.76512
NEMVEDRAFT_v1g219824	A7SZ58	-1.59255	-0.344764	-0.167617	1.26765	-0.00301186	-1.28214	0.461967	-2.38337
NEMVEDRAFT_v1g219848	A7SZ75	-1.08837	0.503955	-0.40829	-0.0958455	-0.064973	0.808583	-0.200101	-0.679062
NEMVEDRAFT_v1g219947	A7SZF1	1.22556	0.238279	-0.244867	0	-1.15848	0	-1.55573	0
NEMVEDRAFT_v1g219959	A7SZG1	-2.2388	0.597557	0.909863	-0.372219	0.493134	1.0808	1.94739	-0.237173
NEMVEDRAFT_v1g219987	A7SZI3	-1.80423	-0.87035	-0.25308	1.51018	-0.0360268	-4.44241	0.221475	-0.924489
NEMVEDRAFT_v1g220056	A7SZP6	-3.69153	-0.149343	-1.9124	-0.960531	-3.5314	0.819582	-0.590361	1.03072
NEMVEDRAFT_v1g220068	A7SZQ7	-5.54038	-0.498255	0.013644	1.18489	0.730192	-0.609356	0.389596	-5.51581
NEMVEDRAFT_v1g220102	A7SZT3	1.67549	-0.680281	2.26428	-0.926759	1.2051	0.991495	2.03754	1.48961
NEMVEDRAFT_v1g220122	A7SZU5	1.8308	0.8684	1.42359	-1.0268	-0.593441	0.470326	0.895096	1.11922
NEMVEDRAFT_v1g220123	A7SZU6	-2.25335	0.275653	1.79648	-0.694907	2.16906	-1.06383	2.28947	0.815662
NEMVEDRAFT_v1g220144	A7SZW3	-2.03798	-0.691179	0.0901885	0.551665	0.710729	-1.28437	0.221476	-0.685712
NEMVEDRAFT_v1g220256	A7T037	2.38158	-1.27841	1.68755	-1.55458	-1.49018	-0.918203	-0.0340888	2.82052
NEMVEDRAFT_v1g220271	A7T043	1.01425	-0.38263	0.441943	0	-0.149244	0	-0.254326	0
NEMVEDRAFT_v1g220290	A7T056	2.48165	0.785876	1.58246	-6.41207	0.647243	5.60153	-0.323026	7.37983
NEMVEDRAFT_v1g2203	A7T0C2	1.20033	-0.587559	0.427003	-0.185824	-0.107388	-0.526375	-0.218033	-1.07469
NEMVEDRAFT_v1g220488	A7T0L7	-1.2986	1.49411	0.736923	-0.12148	1.39751	-1.17026	0.568539	0.0432425
NEMVEDRAFT_v1g220674	A7T102	2.42697	-0.144593	0.684918	-1.21619	-1.38808	0.5715	-1.98372	2.46718
NEMVEDRAFT_v1g220856	A7T1C7	4.51889	-6.43925	5.11928	0.56328	0	-5.71944	0	0.413253
NEMVEDRAFT_v1g220979	A7T1L7	-3.20186	0.0436874	0.241415	1.28989	0.306087	-0.672141	1.12658	-9.4068
NEMVEDRAFT_v1g220991	A7T1M6	-2.33539	-0.621431	-0.441476	1.01497	-1.18424	-0.190055	0.695236	-1.58402
NEMVEDRAFT_v1g221063	A7T1T5	2.22814	-1.11644	0.485808	1.07886	-1.97386	-1.36685	-1.54552	-0.858721
NEMVEDRAFT_v1g221088	A7T1W3	1.08712	-1.45523	1.09049	0.609171	1.10842	-1.88127	-0.0897328	-0.454527
NEMVEDRAFT_v1g221287	A7T2A4	1.24781	-0.438083	-0.248964	0	-1.50998	0	-0.718171	0
NEMVEDRAFT_v1g221291	A7T2A8	1.43908	0.0496201	-0.258203	-0.165518	-1.83948	-0.239507	-0.57067	-0.675644
NEMVEDRAFT_v1g221321	A7T2D1	1.88561	0.465387	0.524939	-2.60949	-1.40356	1.7174	-1.60327	3.52552
NEMVEDRAFT_v1g221353	A7T2F5	-3.09504	2.41526	-0.0687521	-0.556024	0.713605	-0.231807	0.0695357	-1.85985
NEMVEDRAFT_v1g22137	A7SIG6	1.92775	-0.0955248	0.887671	-1.46362	-1.35585	-0.00501567	-1.62772	2.4341
NEMVEDRAFT_v1g221377	A7T2H1	-1.2946	0.49641	-0.787944	0	-0.360217	0	-0.679424	0
NEMVEDRAFT_v1g221469	A7T2N1	1.12376	-0.735504	0.310072	-0.0810679	-0.631164	-1.48044	-0.0123002	0.595708
NEMVEDRAFT_v1g221487	A7T2Q1	1.91203	-2.55877	0.258602	-3.9406	-1.36814	0.92048	-1.85733	6.15361
NEMVEDRAFT_v1g221520	A7T2T4	2.44142	0.112834	1.42811	-1.60747	-0.130632	0.800968	-0.772886	1.74803
NEMVEDRAFT_v1g221521	A7T2T5	1.55498	0.302217	0.767159	-2.15519	0.114864	1.88942	-0.84476	2.79627
NEMVEDRAFT_v1g221583	A7T2Z0	-7.28252	-1.5808	0.635358	1.8258	1.36914	-0.0560585	1.04461	-1.72928
NEMVEDRAFT_v1g221652	A7T348	-6.40349	-0.66934	0.743027	1.0863	2.16139	0.0266733	-0.939765	-1.55485
NEMVEDRAFT_v1g221788	A7T3F7	1.45611	-0.156191	0.680623	-0.49804	-1.88895	-1.12676	0.414034	2.12342
NEMVEDRAFT_v1g221793	A7T3G2	0.801487	-0.0815981	-0.252993	0.247169	-1.04658	-1.06905	-0.330068	-0.419303
NEMVEDRAFT_v1g221811	A7T3I1	1.9017	-1.77812	1.34695	-1.33127	0.768861	0.049053	-0.838096	2.64871
NEMVEDRAFT_v1g221878	A7T3N1	1.87292	-0.550132	0.429603	-0.879327	-1.26555	1.17741	-2.25377	0.568045
NEMVEDRAFT_v1g221882	A7T3N4	-7.34796	-1.20358	2.00119	-0.771843	1.2811	-0.516178	3.23679	1.66708
NEMVEDRAFT_v1g221966	A7T3V0	3.36117	-3.85152	2.23941	-1.27174	-2.1222	-1.69822	-3.76248	2.86322
NEMVEDRAFT_v1g222026	A7T405	-1.37652	-0.73481	-0.270114	-0.0144972	-0.522573	-0.49882	0.456558	-0.465356
NEMVEDRAFT_v1g222036	A7T417	-1.34616	-0.720419	0.743995	0.751263	0.727097	-2.16492	1.2396	-0.610436
NEMVEDRAFT_v1g222094	A7T481	1.31598	0.354588	0.0964144	-1.01523	-1.19894	0.989368	-0.899666	1.27425
NEMVEDRAFT_v1g222286	A7T4N5	-2.0307	1.75141	-0.922587	-0.757864	-1.32246	0.970326	-0.0393012	0.542845
NEMVEDRAFT_v1g222336	A7T4T7	-1.70029	0.527984	-0.406565	0.583123	0.0766543	-0.572517	-0.165514	-2.16968
NEMVEDRAFT_v1g222337	A7T4T8	-0.920067	0.182674	-0.144995	0.340686	-0.303984	0.0251365	0.397406	-3.29495
NEMVEDRAFT_v1g222349	A7T4U8	1.12578	-0.612495	-0.281054	0.685621	-1.44928	-0.200111	-0.892263	-0.477543
NEMVEDRAFT_v1g222388	A7T4Y2	0.957791	-1.15419	0.365101	0.853262	-0.514193	-1.95158	-0.0464746	-0.37486
NEMVEDRAFT_v1g222415	A7T507	0.986012	-0.635969	0.711225	-0.673533	0.0467825	-0.485929	0.554677	1.69211
NEMVEDRAFT_v1g222441	A7T532	1.45771	-1.04339	1.00267	-0.607654	1.04719	1.36309	-0.445975	1.22611
NEMVEDRAFT_v1g222468	A7T561	-5.46563	-2.04216	0.619155	-1.02889	-2.1786	-4.13601	2.10351	0.0701005
NEMVEDRAFT_v1g222512	A7T5A0	1.85798	-1.83762	2.10892	0.558613	1.62054	-3.89827	1.19857	-0.55185
NEMVEDRAFT_v1g222555	A7T5D5	1.91286	-1.36266	0.284427	2.15425	-3.28755	-2.98455	-0.717836	-2.08064
NEMVEDRAFT_v1g222634	A7T5K1	1.97764	-0.471052	1.0102	-1.38376	-0.817661	1.4455	-1.43546	1.49102
NEMVEDRAFT_v1g222670	A7T5N6	2.20525	-1.53466	2.74824	-1.85372	0.673136	-0.539657	1.32573	3.24678
NEMVEDRAFT_v1g222678	A7T5P5	-1.2557	-1.21632	-0.00585823	1.06413	0.416037	-1.27883	0.328005	-1.5121
NEMVEDRAFT_v1g222685	A7T5Q1	-2.48573	-1.82772	-0.150628	0.804026	0.266404	-2.33009	0.334635	-6.49972
NEMVEDRAFT_v1g222703	A7T5S3	-4.83664	-1.93962	2.0569	1.54326	2.67401	-2.42191	2.56932	-3.62713
NEMVEDRAFT_v1g222714	A7T5T5	-5.51112	1.47113	-0.93257	-0.720856	-0.104598	-1.46053	-0.734994	0.204246
NEMVEDRAFT_v1g222786	A7T5Z1	-2.55878	0.224286	-0.764064	0.621074	-0.484573	-2.40491	-0.153736	-1.96252
NEMVEDRAFT_v1g222808	A7T609	-5.08716	0.49053	0.604119	0.965707	1.28135	-1.54793	0.970614	-1.84275
NEMVEDRAFT_v1g222909	A7T686	-2.28699	-0.716685	-1.22296	-0.15354	-1.78416	1.02134	-0.300878	-3.21854
NEMVEDRAFT_v1g222938	A7T6B1	-5.43239	-1.64238	-0.963223	1.37889	-0.407061	-1.98954	-0.503656	-1.90974
NEMVEDRAFT_v1g223006	A7T6G6	1.8541	-1.4233	0.669489	-0.390109	-0.252453	-0.329797	-0.0308222	0.644741
NEMVEDRAFT_v1g223217	A7T717	2.16018	0.735193	2.78109	-1.29429	1.1274	-1.0597	1.37081	1.90019
NEMVEDRAFT_v1g223229	A7T734	1.32759	-0.646365	-0.1984	0.757962	-1.72833	-0.756518	-0.604003	-0.589931
NEMVEDRAFT_v1g223294	A7T794	3.38211	-6.74866	4.26762	1.28501	0	0.079914	0	-5.96421
NEMVEDRAFT_v1g223329	A7T7D5	-0.910336	-0.453155	-0.286021	0.314219	-0.116503	-0.421201	-0.00156392	-0.381646
NEMVEDRAFT_v1g223359	A7T7G4	-1.63435	-0.712128	0.429423	1.59925	0.979612	-2.2835	0.731157	-1.7912
NEMVEDRAFT_v1g223384	A7T7I1	-5.67343	-0.301001	-1.87909	0	-2.17867	0	-0.904245	0
NEMVEDRAFT_v1g223528	A8DUS2	0.941707	-0.431779	-0.242065	0.141315	-0.861018	-0.602146	-0.987126	-0.896556
NEMVEDRAFT_v1g223544	A7T7V9	1.081	-0.230127	0.184181	0	-0.882003	0	-0.134933	0
NEMVEDRAFT_v1g223575	A7T7Y5	2.0989	-0.093919	0.339743	-0.912854	-2.50571	0.523012	-0.939765	1.76535
NEMVEDRAFT_v1g223650	A7T852	-8.068	0.679485	-0.309535	-0.0635262	-0.974459	-8.0403	0.928814	2.18936
NEMVEDRAFT_v1g223762	A7T8E5	2.77312	-0.894749	1.79995	-3.83997	-0.426832	2.83577	-1.7261	4.7149
NEMVEDRAFT_v1g223808	A7T8I4	1.82035	0.599483	0.191516	-2.28439	-1.19709	2.71884	-1.88218	2.21003
NEMVEDRAFT_v1g223823	A7T8J6	-2.36722	0.134584	-0.0887632	0.553909	0.226583	-0.840677	0.512309	0.108816
NEMVEDRAFT_v1g223827	A7T8K0	5.60737	-4.47638	3.56502	-0.664698	0	0.990922	0	0.20947
NEMVEDRAFT_v1g223899	A7T8R6	2.38133	-1.44245	0	0	0	0	0	0
NEMVEDRAFT_v1g223956	A7T8X0	-1.63589	0.17539	1.08567	0.37039	0.871945	-0.113391	1.90141	-0.735043
NEMVEDRAFT_v1g224074	A7T981	-5.3919	0.216637	0.213119	0.82271	0.433185	-0.859751	1.01601	-5.02913
NEMVEDRAFT_v1g224097	A7T9A5	-2.02464	-0.465244	-0.226971	0.824928	-0.209338	-0.530632	0.532566	-1.05341
NEMVEDRAFT_v1g224144	A7T9E9	-5.92099	0.20021	-0.166818	0	-0.192906	0	0.783347	0
NEMVEDRAFT_v1g224266	A7T9R8	1.19697	-0.878146	0.931099	-0.228163	0.181503	0.618774	0.798973	0.32429
NEMVEDRAFT_v1g2243	A7T315	-7.10996	0.887285	0.588794	-0.162858	0.337635	0.121277	1.67279	0.322779
NEMVEDRAFT_v1g224317	A7T9W9	0.971329	0.452816	0.355273	-1.1053	0.0804573	0.42567	-0.618287	1.757
NEMVEDRAFT_v1g224322	A7T9X4	-5.13409	1.14417	-1.31685	-4.65907	-0.44835	4.90929	-1.19561	0
NEMVEDRAFT_v1g224372	A7TA37	-3.41368	-1.02273	0.555161	1.99757	0.326395	-5.79355	1.54969	-3.36676
NEMVEDRAFT_v1g224558	A7TAL6	1.81151	-0.809258	0.5648	-2.55823	-1.282	0.3161	-0.0831133	3.58774
NEMVEDRAFT_v1g224641	A7TAU1	3.01006	-1.81159	1.19516	-0.589211	-2.67752	-1.00134	-7.77916	-3.09497
NEMVEDRAFT_v1g224667	A7TAX2	1.60783	-0.474375	0	0	0	0	0	0
NEMVEDRAFT_v1g224777	A7TB86	-5.68135	-0.49608	2.89462	1.45312	3.46892	-2.49145	3.40352	-2.53451
NEMVEDRAFT_v1g224986	A7TBW5	2.63421	-2.82437	0.383531	0.168738	-1.44158	0.385544	-0.418771	1.1625
NEMVEDRAFT_v1g225021	A7TC05	2.2716	-2.52173	1.05496	-1.06143	-0.303877	0.431308	-0.866109	2.45909
NEMVEDRAFT_v1g225168	A7TCB3	-7.94013	-0.234715	-0.0499877	-5.76682	0.420819	6.19464	0.633825	6.59182
NEMVEDRAFT_v1g225169	A7TCB4	-5.52	-0.821014	0.485891	-6.48793	-1.52636	6.76389	1.89885	7.95582
NEMVEDRAFT_v1g225175	A7TCB9	1.73668	-1.69147	0.955229	0.914275	0.403044	-0.839031	-0.738514	-0.644974
NEMVEDRAFT_v1g225205	A7RXA0	-1.40875	0.692459	-0.941649	-0.116663	-0.41835	0.485601	-0.951238	-0.560727
NEMVEDRAFT_v1g225661	A8DVD3	-2.1969	-1.87571	2.30211	1.27392	3.43895	-2.74166	1.57559	-0.879153
NEMVEDRAFT_v1g226211	A7RHV2	-1.10109	0.031743	-0.097678	0.055562	0.684623	0.563773	-0.378011	-0.609088
NEMVEDRAFT_v1g226328	A7RLY4	-1.14085	0.512586	-0.0976483	-0.253885	0.0742419	0.62745	0.353365	0.312215
NEMVEDRAFT_v1g226402	A7RPV7	-1.84797	0.35297	-0.189756	0.455736	0.708306	-0.420636	-0.464877	-2.52344
NEMVEDRAFT_v1g226527	A7RU39	-2.65372	-0.352475	-0.0790004	1.20808	0.508265	-0.879372	0.308523	-2.6342
NEMVEDRAFT_v1g226633	A7RY60	-0.777652	-0.0560706	0.000456295	0	0.405049	0	0.0900893	0
NEMVEDRAFT_v1g226653	A7RYP7	-1.6398	-0.340844	-0.190971	0.498921	0.449749	-0.290676	-0.0243355	-1.36623
NEMVEDRAFT_v1g226738	A7S1F1	1.58534	-0.986278	1.88641	-0.00195376	1.1929	-0.755069	1.22365	1.00652
NEMVEDRAFT_v1g226878	A7S655	-1.34535	-0.0575094	0.194789	0.749682	0.728135	-0.700019	0.448059	-1.25003
NEMVEDRAFT_v1g226991	A7SA87	0.757295	-0.375984	0	-1.01408	0	0.753738	0	1.29887
NEMVEDRAFT_v1g227371	A7SPG3	-1.67307	0.66978	-0.667437	-0.199278	-1.22745	0.549829	0.284767	-1.2448
NEMVEDRAFT_v1g227634	A7SZW4	-0.924125	0.272203	0.469972	0	0.783676	0	0.779348	0
NEMVEDRAFT_v1g227643	A7T0C7	-1.18194	-0.0977118	0.535693	0	0.321982	0	1.28063	0
NEMVEDRAFT_v1g227865	A7RFM5	0.974204	0.0301112	0.656132	0	0.223052	0	0.295526	0
NEMVEDRAFT_v1g227907	A7RG40	1.1224	0.237179	0.241556	-1.20303	-1.15019	1.13101	-0.339663	1.65432
NEMVEDRAFT_v1g227908	A7RG45	-7.27979	-7.61273	2.62241	-4.99161	4.14644	5.62598	-0.503592	0.473126
NEMVEDRAFT_v1g227960	A7RGS8	-3.87666	0.374323	2.06417	0.910758	2.38812	-1.70401	2.8	-1.49106
NEMVEDRAFT_v1g227987	A7RH38	-3.66958	0.324825	-0.707624	0.271504	-0.147875	-0.909161	-0.216371	-2.42603
NEMVEDRAFT_v1g228005	A7RHC1	1.02989	0.101476	0.269704	-0.786211	-0.170602	0.87883	-0.19418	1.2584
NEMVEDRAFT_v1g228028	A7RHP2	2.0849	0.0160098	0.946888	-1.4747	-0.968894	1.98502	-2.96557	-0.285162
NEMVEDRAFT_v1g228132	A7RJD9	0.613167	0.460187	-0.174762	-0.503626	-0.77834	-0.192034	-0.248852	0.219831
NEMVEDRAFT_v1g228135	A7RJF7	-1.70442	-0.0433367	-0.0461235	0.672742	0.469069	-0.666909	0.286313	-1.23683
NEMVEDRAFT_v1g228405	A7RNF6	-2.42392	-0.462964	0.193872	0.756377	1.18662	-0.00969146	-0.0580051	-1.74654
NEMVEDRAFT_v1g228495	A7RPX4	-1.65586	-0.0648389	1.40041	0	2.19864	0	1.17015	0
NEMVEDRAFT_v1g228581	A7RRD6	-1.2088	0.478854	-0.375639	0.285027	-0.133541	-0.229824	0.0311726	-1.35974
NEMVEDRAFT_v1g228748	A7RU11	-0.72349	0.0230767	0.213598	0.543428	0.586536	-0.491169	0.283018	-0.953053
NEMVEDRAFT_v1g228829	A7RVD9	1.50738	-0.186854	0.108906	0	-0.776893	0	-1.7136	0
NEMVEDRAFT_v1g228853	A7RVT5	-1.45228	-0.356114	-0.652291	0.582119	-0.304008	-0.446501	-0.313216	-1.26193
NEMVEDRAFT_v1g228964	A7RXS1	-4.0673	1.03491	-0.178436	-1.57275	0.098391	1.06186	0.570044	-1.57104
NEMVEDRAFT_v1g228981	A7RY63	-1.33036	-0.0464082	-0.0812613	0.616727	0.670976	-1.74229	-0.717844	-0.531791
NEMVEDRAFT_v1g229027	A7RYV3	-1.41198	0.561424	-0.293623	0.524417	-0.0531446	-0.636041	0.0976698	-0.658086
NEMVEDRAFT_v1g22904	A7S5I0	-1.12361	-0.22462	0.197226	0.522995	0.560834	-0.724513	0.503891	-0.477209
NEMVEDRAFT_v1g229125	A7S0M2	-3.65642	-1.1295	0.0723588	2.15729	0.760019	-3.30948	0.459377	-2.86946
NEMVEDRAFT_v1g229146	A7S0Y2	-2.61494	-0.586244	-0.388879	0.157085	-0.660972	0.119973	0.59544	-2.17531
NEMVEDRAFT_v1g229200	A7S1T2	-1.71776	-1.63152	0.354808	0.939302	0.949824	-0.341689	0.599258	-2.33218
NEMVEDRAFT_v1g229311	A7S3D7	1.27004	-0.224978	0.119971	-0.074645	-0.690987	1.10468	-0.684199	-0.342844
NEMVEDRAFT_v1g229325	A7S3T2	-8.08982	0.113129	-0.182731	1.30644	-0.11554	-0.879782	0.775108	-4.91848
NEMVEDRAFT_v1g229327	A7S3V2	-6.0517	-0.755022	1.16756	0.50316	2.16754	-6.9797	1.08141	-1.00734
NEMVEDRAFT_v1g229451	A7S5K6	-1.10677	-0.571887	0.0166613	0.875015	0.266706	-1.0223	0.442569	-1.45461
NEMVEDRAFT_v1g229457	A7S5R4	-1.44249	0.0548818	-0.173835	0	0.202993	0	0.171204	0
NEMVEDRAFT_v1g229523	A7S6M2	-2.29939	0.752544	0.734701	-0.751274	0.369699	1.29075	1.7579	-1.04035
NEMVEDRAFT_v1g229609	A7S7W6	-1.31193	-1.32766	-0.422806	0.421939	-0.270517	-1.76788	0.137869	-0.697918
NEMVEDRAFT_v1g229643	A7S8F9	1.3685	0.25935	0.443904	-1.39961	-1.26177	1.30566	-0.630743	1.77401
NEMVEDRAFT_v1g229686	A7S940	1.5213	-0.258458	0.297705	-0.8211	-1.35847	0.321408	-0.400627	1.3099
NEMVEDRAFT_v1g229711	A7S9K6	-3.37156	1.35539	2.51114	0.259505	3.02225	-1.98793	3.07107	-1.6586
NEMVEDRAFT_v1g22981	A7RX33	1.25268	-0.348319	1.00791	-0.0480122	0.309491	-1.15302	-0.276028	0.632423
NEMVEDRAFT_v1g229839	A7SBN0	-3.28692	-0.967899	0.279456	1.69503	1.02234	-3.33048	0.563588	-1.67011
NEMVEDRAFT_v1g230001	A7SE93	1.2987	0.372833	0.582366	-0.793381	-0.812791	0.727954	-0.230094	0.807186
NEMVEDRAFT_v1g230058	A7SEY1	0.82719	-0.181695	0.0254035	0.106233	-0.723365	-0.926256	-0.233088	0.359654
NEMVEDRAFT_v1g230060	A7SF10	-1.04493	0.453412	-0.0415149	-0.874055	0.422188	1.07039	-0.0652652	1.48668
NEMVEDRAFT_v1g230205	A7SGX6	-1.71162	-0.244146	0.211389	1.02442	1.12442	-0.737816	-0.0268831	-1.84672
NEMVEDRAFT_v1g230222	A7SHB7	0.982162	-0.942645	0.891534	0.220661	0.70963	-1.56838	0.48267	0.0196778
NEMVEDRAFT_v1g230299	A7SIV6	-1.04347	-0.187714	0.275289	0.304007	0.554405	-0.448005	0.688167	-0.70085
NEMVEDRAFT_v1g230404	A7SKL4	-1.45142	-0.486253	0.172106	1.01694	0.137423	-1.37757	0.935197	-2.04061
NEMVEDRAFT_v1g230469	A7SLH0	-1.29091	0.28164	0.301183	-0.873927	0.472033	1.24745	0.79034	-0.5918
NEMVEDRAFT_v1g230591	A7SNN9	-1.81901	-0.185895	-0.0140364	0.857194	0.498408	-1.16084	0.34583	-1.53545
NEMVEDRAFT_v1g230617	A7SNX1	-1.68491	0.188361	-0.126443	0.833045	0.433007	-0.676421	0.115017	-2.02807
NEMVEDRAFT_v1g230652	A7SPL4	-1.47316	-0.525613	-0.217849	-0.791191	-0.266292	-0.2242	0.402529	1.18086
NEMVEDRAFT_v1g231029	A7SWA5	-1.52679	-0.531071	-0.0652357	1.50041	0.356245	-0.838194	0.325904	-2.2563
NEMVEDRAFT_v1g231092	A7SX81	-1.58189	-0.383929	-0.805885	0.530751	0.0610192	-0.244804	-1.10377	-1.54261
NEMVEDRAFT_v1g231142	A7SXZ4	-1.34125	0.0977583	-0.360863	-0.11197	-0.0054487	0.817708	-0.0518294	-1.5275
NEMVEDRAFT_v1g231277	A7T0S9	-2.75243	0.694791	-0.258798	0.199566	0.309259	0.985546	0.185014	-1.97328
NEMVEDRAFT_v1g231688	A8DWR4	-1.86543	-0.300452	0.959133	0.211802	1.0028	-0.962287	1.65793	-0.123837
NEMVEDRAFT_v1g231731	A7RFQ4	-1.19012	-0.0375994	-0.215579	0.697319	-0.244693	-0.799743	0.407893	-1.56955
NEMVEDRAFT_v1g231906	A7RJK2	1.37739	-0.0912713	1.14037	-0.422247	0.786045	0.237073	0.531597	1.03286
NEMVEDRAFT_v1g23194	A7S8B6	-0.930802	0.698738	-0.420763	0	-0.445551	0	-0.0455005	0
NEMVEDRAFT_v1g232015	A7RMJ7	1.60022	0.707447	1.28995	-1.64785	0.180128	1.77167	-0.691745	0.770782
NEMVEDRAFT_v1g232054	A7RNK4	-6.04704	1.34234	2.0557	-0.348578	-1.52639	-1.55767	3.58453	-4.14187
NEMVEDRAFT_v1g232099	A7RPT2	-2.20707	-0.399574	-1.97463	0.501906	-0.766769	-0.106171	-3.95583	-2.43651
NEMVEDRAFT_v1g232373	A7RWZ2	0.638778	-0.0234612	0.487134	0	0.0107031	0	0.310169	0
NEMVEDRAFT_v1g232486	A7RZE9	-2.63286	0.530342	-0.51257	-0.672269	-0.0542754	0.309755	-0.0577978	0.342235
NEMVEDRAFT_v1g232516	A7S059	-1.66074	-0.444526	0.0913533	0.763793	0.672417	-1.17411	0.374065	-1.03913
NEMVEDRAFT_v1g232570	A7S1I3	-0.913494	-0.609333	-0.332556	1.0128	-0.213082	-1.1451	0.0589183	-1.49327
NEMVEDRAFT_v1g232587	A7S220	1.72849	-1.37613	1.34656	-1.50916	-0.522995	0.557331	0.444613	2.32452
NEMVEDRAFT_v1g232632	A7S384	-1.29754	0.0341547	0.141387	1.06336	0.674806	-1.28975	0.349907	-1.72859
NEMVEDRAFT_v1g232792	A7S6M4	-5.98134	0.436179	-0.884106	-1.62359	-0.303936	1.53828	-0.503618	-0.555594
NEMVEDRAFT_v1g232941	A7SAG0	-1.90945	0.495007	0.268786	-1.29401	0.638178	0.516978	0.671647	1.37164
NEMVEDRAFT_v1g232979	A7SBJ0	-0.776695	-0.286922	-0.245861	0	0.285652	0	-0.336406	0
NEMVEDRAFT_v1g233044	A7SDC4	-0.966112	0.0609639	0.537895	0	0.923766	0	0.731948	0
NEMVEDRAFT_v1g233056	A7SDR5	-2.86426	0.601786	0.695799	0.711443	1.79421	-1.03931	0.2317	-0.76045
NEMVEDRAFT_v1g233061	A7SDX4	-1.19817	-0.124783	-0.0479892	0.822694	0.381098	-1.03481	0.212712	-1.22175
NEMVEDRAFT_v1g233095	A7SEP6	-1.02481	0.754377	0.375355	-0.405999	0.909604	0.292063	0.418361	0.0344844
NEMVEDRAFT_v1g233133	A7SFE9	-2.22695	0.83955	0.229604	0.215244	-0.340068	0.0282421	1.30791	-0.854731
NEMVEDRAFT_v1g233147	A7SFN3	-1.81211	0.371	-0.244731	0.225429	0.188129	-0.250208	0.126132	-1.36861
NEMVEDRAFT_v1g233332	A7SL35	-1.87328	1.30905	-0.579863	-0.840652	0.47298	1.52247	-1.32093	0.0562699
NEMVEDRAFT_v1g233387	A7SMV1	-0.846933	-0.413207	0.42054	0.814891	0.64732	-0.745206	0.82605	-1.08134
NEMVEDRAFT_v1g233446	A7SPR3	1.32382	-0.927338	1.95824	-0.765744	1.24031	-0.32844	1.39939	1.66734
NEMVEDRAFT_v1g233459	A7SQB3	-1.53549	-0.00103401	1.41562	0.323197	1.31329	-1.11735	2.1798	-0.0945424
NEMVEDRAFT_v1g233595	A7STU6	-1.18905	-0.25125	0.713211	0.539116	1.42078	-1.55719	0.51425	-0.096425
NEMVEDRAFT_v1g233638	A7SV95	-1.55562	1.04609	-0.328939	-0.464702	0.320899	0.63418	-0.350371	-0.537173
NEMVEDRAFT_v1g233661	A7SWD0	-0.806239	0.274253	0.190176	0	0.0926734	0	0.774692	0
NEMVEDRAFT_v1g233680	A7SWU3	-1.24558	0.703754	-0.21782	0	0.0885827	0	0.137819	0
NEMVEDRAFT_v1g23386	A7RZJ7	-1.62346	-0.242184	-0.129022	1.53073	0.548817	-1.13622	-0.0203528	-3.10519
NEMVEDRAFT_v1g233887	A7RFN0	-3.52256	1.41662	-1.43765	-2.4877	-1.93878	2.13982	-0.503705	0.440856
NEMVEDRAFT_v1g233903	A7RFW4	-2.04495	-0.0970297	0.5169	-0.349806	-0.0703189	0.836254	1.59215	-0.877271
NEMVEDRAFT_v1g233916	A7RG53	2.90712	-4.94272	2.81074	-6.16145	-0.37484	0.245277	0.547265	6.94531
NEMVEDRAFT_v1g233970	A7RH52	-0.802194	-0.0649128	-0.505981	0	-0.766084	0	0.037103	0
NEMVEDRAFT_v1g234082	A7RJF8	-1.72201	-1.29589	0.160495	0.582012	0.68126	-0.380046	0.471554	-0.493084
NEMVEDRAFT_v1g234158	A7RLH8	-1.03966	-0.503651	0.0466245	1.09417	0.502602	-1.84359	0.210809	-1.0953
NEMVEDRAFT_v1g234206	A7RME0	-1.87086	-0.186381	0.191612	0.534412	0.741265	-0.0429799	0.54674	-2.00515
NEMVEDRAFT_v1g234286	A7RP51	-3.32242	-1.6213	-0.154276	1.41819	0.353077	-2.88494	0.410294	-1.96704
NEMVEDRAFT_v1g234328	A7RQ98	-1.68347	-0.629845	0.355581	0.451102	0.297355	-0.0912307	1.1561	-2.2286
NEMVEDRAFT_v1g234345	A7RQU9	-6.35481	-3.60337	3.96989	-4.06814	5.52914	4.0444	-1.35166	-2.5613
NEMVEDRAFT_v1g234370	A7RRH1	-1.25895	0.820868	-0.418002	-0.804644	-0.231842	0.152384	-0.0794659	1.29812
NEMVEDRAFT_v1g234388	A7RRT6	-0.938574	0.28592	-0.419963	0.472502	-0.335534	0.0358576	-0.0407494	-1.49077
NEMVEDRAFT_v1g234428	A7RT36	-3.05608	-0.591771	1.57923	1.92084	2.35052	-3.15177	1.81672	-3.08587
NEMVEDRAFT_v1g234439	A7RT78	1.72904	-0.285823	0.255777	0	-1.72632	0	0.0595814	0
NEMVEDRAFT_v1g234533	A7RV88	4.34819	-6.01948	6.16204	-9.69252	-1.37659	2.87269	3.16515	10.6364
NEMVEDRAFT_v1g234541	A7RVM0	0.997522	0.450716	0.58695	-0.738688	0.0665602	0.971926	0.0916989	0.882142
NEMVEDRAFT_v1g234646	A7RYC9	0.759242	0.21592	0.314419	-0.412507	0.0244488	0.524654	0.00325693	0.997161
NEMVEDRAFT_v1g234715	A7S0D5	-1.69803	0.0194059	0.31358	0.606988	0.25361	-1.12661	1.10574	-1.15614
NEMVEDRAFT_v1g234745	A7S156	0.9204	-1.01424	0.303309	0.0796264	-0.61326	-0.444342	0.184927	0.170572
NEMVEDRAFT_v1g234790	A7S2A5	-2.2434	0.0541515	0.211692	0.804074	1.15611	-0.472071	0.0247327	-1.73741
NEMVEDRAFT_v1g234821	A7S2M8	1.02223	0.2502	0.474458	-0.673796	-0.179798	0.339363	0.18045	0.98301
NEMVEDRAFT_v1g235065	A7S7U0	-2.51531	0.486072	0.781286	0.557361	0.816964	0.136699	1.64709	-2.03437
NEMVEDRAFT_v1g235152	A7S9P1	-0.863498	-0.39886	-0.124984	0.718789	0.352032	-0.801654	-0.014922	-1.38663
NEMVEDRAFT_v1g235187	A7SAH6	0.683596	0.101331	0.971872	0	0.864267	0	0.718721	0
NEMVEDRAFT_v1g235198	A7SAP2	1.26325	-1.7916	1.21494	0.276532	0.767764	-1.56859	0.912833	0.391
NEMVEDRAFT_v1g23523	A7S1R2	-1.26481	-1.14511	0.521378	1.29599	0.853615	-1.51747	0.840307	-1.56037
NEMVEDRAFT_v1g235255	A7SCH8	-0.639881	0.116316	0	0	0	0	0	0
NEMVEDRAFT_v1g235302	A7SDD6	-1.93066	-0.674754	-0.334257	1.05891	-0.0137763	-1.64201	0.251357	-2.08666
NEMVEDRAFT_v1g235305	A7SDG1	-1.55662	0.435569	-1.07866	0.506402	-1.23749	-0.0274278	-0.332661	-1.72893
NEMVEDRAFT_v1g235350	A7SEN7	-1.53789	-0.348608	-0.0146853	0.704382	0.635236	-0.268965	0.0944344	-0.904469
NEMVEDRAFT_v1g235494	A7SHU5	-2.51851	0.11991	-0.226488	0.209477	0.680278	-0.226945	-0.361859	-0.726941
NEMVEDRAFT_v1g235501	A7SHY3	-0.900864	-0.702328	0.445689	1.11456	1.01068	-2.68703	0.462031	-1.11171
NEMVEDRAFT_v1g235524	A7SIQ7	-1.21854	-0.398807	0.216694	0.481026	0.208886	-0.318034	0.902651	-0.846408
NEMVEDRAFT_v1g235541	A7SJ50	-1.54165	0.303747	-0.443781	0	-0.24495	0	0.0571852	0
NEMVEDRAFT_v1g235575	A7SJU0	-1.57215	-0.490991	0.0428319	0.983864	0.589617	-0.512479	0.343537	-2.52318
NEMVEDRAFT_v1g235585	A7SJZ4	-0.870838	-0.134206	0.618053	0.309538	0.75158	0.364874	1.0934	-1.01586
NEMVEDRAFT_v1g235633	A7SL09	-2.30952	-0.101879	-0.474702	0.361608	0.475766	0.376323	-0.730791	-2.34154
NEMVEDRAFT_v1g235706	A7SN32	1.0081	-0.539041	0.798294	0.450721	0.788313	-0.761096	-0.123106	0.0413705
NEMVEDRAFT_v1g235717	A7SND1	-1.76165	1.68952	0.374183	-0.502626	0.292172	0.494078	1.08136	-0.648464
NEMVEDRAFT_v1g235762	A7SPA0	0.644734	0.140982	0.547243	-0.460011	0.425543	0.951928	0.333921	0.238487
NEMVEDRAFT_v1g235854	A7SRJ2	0.695289	-0.0132738	0	0.550884	0	-0.368745	0	-1.07477
NEMVEDRAFT_v1g235867	A7SRW2	-1.49285	-0.0471742	-0.313125	0.239822	0.309998	0.0178222	-0.214232	-0.994862
NEMVEDRAFT_v1g235892	A7SSG0	-2.48614	0.309584	-0.53921	0.0855171	-0.125798	0.0557461	0.00429474	-1.99259
NEMVEDRAFT_v1g235912	A7SSU7	0.886113	-0.302568	0.513551	-0.646277	0.208992	0.0619805	0.0539987	1.01777
NEMVEDRAFT_v1g235919	A7ST15	-0.714685	0.160742	0.142398	0	0.672897	0	-0.118848	0
NEMVEDRAFT_v1g235936	A7STE4	-1.45937	0.853221	0.623308	-0.3354	1.48177	0.94473	0.275725	-1.18948
NEMVEDRAFT_v1g235960	A7SU44	-2.43418	-0.55039	-0.0267459	1.22439	0.326227	-0.69713	0.589699	-3.42463
NEMVEDRAFT_v1g236044	A7SX50	-4.62462	-0.549613	1.59469	2.04056	2.43586	-3.20067	1.82747	-3.46736
NEMVEDRAFT_v1g236054	A7SXC5	-2.36197	-0.0262299	-1.08538	0.0445925	-0.483653	0.739565	-0.852332	-1.02207
NEMVEDRAFT_v1g236117	A7SZA7	-1.83587	-0.597867	0.458902	0.956167	1.29698	-0.770925	0.401157	-0.954079
NEMVEDRAFT_v1g236165	A7T0S1	-0.607954	-0.508474	-0.352549	0.47792	0.0541004	-0.412766	-0.372512	-0.681088
NEMVEDRAFT_v1g236199	A7T1M9	0.765261	-0.371738	0.161917	0	-0.358099	0	-0.259986	0
NEMVEDRAFT_v1g236269	A7REX1	-1.56369	-0.609855	-0.538871	1.43143	-0.458228	-0.89367	0.0790229	-3.55556
NEMVEDRAFT_v1g236308	A7RG82	-1.47675	0.0971297	-0.2672	0.358144	0.0270509	0.278662	0.232109	-1.87251
NEMVEDRAFT_v1g236357	A7RHV7	-1.64173	0.446027	-0.0485499	0.432984	0.175654	-0.036265	0.486135	-1.0396
NEMVEDRAFT_v1g236362	A7RHZ6	-1.60957	0.0113568	-0.243257	0.551383	0.533189	-0.133091	-0.326977	-1.69981
NEMVEDRAFT_v1g236378	A7RIL6	-1.53738	0.414662	-0.33636	0.295086	0.192688	-0.635547	-0.0877251	-0.404072
NEMVEDRAFT_v1g236381	A7RIQ2	-1.05155	0.155555	-0.474094	0.0537346	0.278595	0.523773	-0.794225	-0.999458
NEMVEDRAFT_v1g236441	A7RL90	-5.61653	0.37369	-0.744675	0.807382	-0.860409	-1.59899	0.21013	-2.37913
NEMVEDRAFT_v1g236459	A7RLX5	-1.89535	-0.943764	-0.119803	1.35236	0.816852	-1.24414	-0.363819	-2.11611
NEMVEDRAFT_v1g236489	A7RMV9	-1.8603	0.622728	-0.133986	0.0312282	-1.03539	0.623732	0.982339	-0.692087
NEMVEDRAFT_v1g236535	A7RQ72	-1.54327	-0.68394	0.176216	0.661678	0.690088	-0.427091	0.45396	-1.52302
NEMVEDRAFT_v1g236556	A7RRB5	-1.01954	-0.198154	0.369451	0.503512	0.23428	-0.58909	1.08127	-0.369593
NEMVEDRAFT_v1g236578	A7RRT7	-1.27816	0.191388	-0.58017	0	-0.914858	0	0.227358	0
NEMVEDRAFT_v1g236583	A7RRY5	-0.699584	0.153508	-0.086972	0	-0.174138	0	0.394897	0
NEMVEDRAFT_v1g236593	A7RSE0	-1.8102	0.0772243	-0.313807	-0.518667	0.366368	0.553761	-0.395608	-1.08565
NEMVEDRAFT_v1g236609	A7RT47	-0.61408	-0.641283	-0.23666	1.04878	0.215427	-1.14235	-0.483	-1.01002
NEMVEDRAFT_v1g236650	A7RUD5	-1.33433	-0.154982	0.319752	0.85131	1.06215	-0.514904	0.179391	-1.30801
NEMVEDRAFT_v1g236681	A7RVJ1	-1.37156	-0.0151351	-0.398479	0.897708	0.270906	-0.622903	-0.373121	-1.53056
NEMVEDRAFT_v1g236711	A7RWZ5	-1.39465	-0.159845	-0.201295	0.492398	0.0652875	-0.380003	0.332096	-1.47445
NEMVEDRAFT_v1g236715	A7RX67	-5.79059	3.05555	-0.617806	-3.86353	-4.24045	-0.612557	0.912209	5.22953
NEMVEDRAFT_v1g236721	A7RXF6	-1.03933	0.235127	0.21946	0	0.86201	0	0.162192	0
NEMVEDRAFT_v1g236726	A7RXM6	-1.62275	0.0197871	0.0211673	-0.584429	0.297983	0.105749	0.507243	0.492838
NEMVEDRAFT_v1g236730	A7RXR8	-0.89012	-0.0885343	-0.250821	0	0.120188	0	-0.0954885	0
NEMVEDRAFT_v1g236760	A7RYS8	-0.817597	-0.0448285	-0.344873	0	-0.0956475	0	-0.0584758	0
NEMVEDRAFT_v1g236771	A7RZ60	0.965243	-0.668356	0.983172	0	0.963334	0	0.173045	0
NEMVEDRAFT_v1g236815	A7S0Q1	-0.702445	0.00913887	0	-0.297471	0	-0.21791	0	1.09858
NEMVEDRAFT_v1g236923	A7S4X7	-1.49183	-0.336805	-0.168232	0	0.231446	0	0.253533	0
NEMVEDRAFT_v1g236931	A7S530	-2.50044	-0.14738	0.257059	0.94666	-0.466414	-0.508579	1.42174	-2.96734
NEMVEDRAFT_v1g236947	A7S5N1	1.1946	-0.33369	0.702379	0	0.510489	0	-0.489579	0
NEMVEDRAFT_v1g236995	v1g236995	-1.1894	-0.405851	-0.939009	1.18375	-0.644428	-1.60562	-0.64767	-1.4306
NEMVEDRAFT_v1g237042	A7S9G8	-2.26892	0.428457	-0.140357	-1.86804	0.450399	2.23743	0.0468563	-0.636304
NEMVEDRAFT_v1g237165	A7SEF9	-3.52807	0.0428221	-0.685956	0.159637	0.0492388	-0.200454	-0.391798	-2.47767
NEMVEDRAFT_v1g237177	A7SEP5	-1.08134	-0.726283	0.024336	0.0828509	0.120874	-0.39327	0.552502	0.406915
NEMVEDRAFT_v1g237281	A7SI65	-3.31802	1.62566	-0.0795181	-2.16064	-0.316449	2.12718	0.92902	-1.19471
NEMVEDRAFT_v1g237378	A7SMZ7	-0.647551	-0.31857	-0.113656	-0.169161	0.0393112	0.642421	0.171645	-0.298227
NEMVEDRAFT_v1g237400	A7SP27	-1.78314	0.0464041	0.470704	0.592718	-0.000507402	0.276088	1.49675	-1.22702
NEMVEDRAFT_v1g237414	A7SPM3	-2.60872	0.437133	0.323964	0.560494	0.795625	0.372993	0.824167	-2.20092
NEMVEDRAFT_v1g237431	A7SQG7	-2.08695	-0.578347	0.0361536	1.42052	0.587001	-0.992627	0.428969	-2.58376
NEMVEDRAFT_v1g237483	A7SSP6	-0.637993	0.512239	-0.493805	0	-0.484231	0	-0.184245	0
NEMVEDRAFT_v1g237501	A7STD0	-0.821198	-0.159725	-0.0518219	0.433842	0.249112	-0.289533	0.238077	-0.59479
NEMVEDRAFT_v1g237612	A7SZB9	-1.63481	-1.19249	-0.138123	-0.340059	-0.670585	-1.4217	0.863383	0.884942
NEMVEDRAFT_v1g237640	A7T105	-1.43182	0.0364285	-0.462484	0.532453	0.233463	-0.702609	-0.484864	-1.09406
NEMVEDRAFT_v1g237683	A7T8R9	-7.7966	0.054103	6.5633	-0.569332	7.82031	1.52968	5.80015	-0.563429
NEMVEDRAFT_v1g237718	A7RET7	-1.29457	0.301611	0.0259133	0	0.649431	0	0.0435321	0
NEMVEDRAFT_v1g237728	A7REV6	-1.9064	-0.213371	0.6008	0.0307873	0.301191	0.698483	1.56834	-1.80583
NEMVEDRAFT_v1g237798	A7RF80	0.758084	0.208939	0.19666	-0.763565	-0.50301	0.780558	-0.0676202	1.11607
NEMVEDRAFT_v1g237827	A7RFC3	0.882271	0.0309813	0.231795	-0.352919	-0.103106	-0.00509077	-0.64995	1.26623
NEMVEDRAFT_v1g237874	A7RFK3	2.25667	-1.58929	1.60232	-1.95621	-0.988372	0.69387	-0.396047	3.13608
NEMVEDRAFT_v1g237876	A7RFK5	-4.796	-0.0334751	-0.340954	-0.236123	-1.06096	-2.3633	0.8948	-1.4594
NEMVEDRAFT_v1g237879	A7RFK9	-1.59419	0.495624	-0.312101	0.707242	0.0445052	-0.358017	0.125241	-1.73951
NEMVEDRAFT_v1g237945	A7RFW0	-0.872429	0.0482262	-0.0709768	0.811441	0.148951	-0.782609	0.278395	-1.36847
NEMVEDRAFT_v1g237955	A7RFX5	-1.83856	-0.104542	-1.0661	0.565785	-0.444266	-0.266379	-0.984476	-0.949754
NEMVEDRAFT_v1g237970	A7RFZ6	-1.39988	-0.402085	-0.155258	0.944089	0.239979	-0.990969	0.200889	-1.50932
NEMVEDRAFT_v1g238016	A7RG57	1.44329	-1.01956	0.693998	-1.88942	-1.0316	0.954088	-0.173472	2.85464
NEMVEDRAFT_v1g238019	A7RG59	-1.04884	-0.656785	0.384847	0.831196	0.745003	-0.994799	0.722866	-1.16596
NEMVEDRAFT_v1g238058	A7RGC9	1.09613	0.38356	0.558539	-1.08787	-0.332241	2.13915	0.270974	0.63102
NEMVEDRAFT_v1g238109	A7RGN0	-1.38801	0.347076	-0.557805	0.53596	0.164222	0.200013	-0.659347	-2.23703
NEMVEDRAFT_v1g238120	A7RGP6	-1.44054	-0.585792	-0.832541	1.00942	-1.07963	-1.38098	-0.0742072	-1.45426
NEMVEDRAFT_v1g238203	A7RH21	-1.44274	-0.080558	0.131019	-0.989524	0.502576	1.6753	0.398203	-0.648089
NEMVEDRAFT_v1g238226	A7RH48	0.885162	-0.515763	0.668519	0	0.0485121	0	0.793159	0
NEMVEDRAFT_v1g238247	A7RH80	0.636043	-0.174629	0.511841	0	0.422117	0	0.273492	0
NEMVEDRAFT_v1g238287	A7RHE6	-0.845281	0.394747	-0.125355	0.207368	0.0234963	-0.250511	0.250951	-1.24023
NEMVEDRAFT_v1g238307	A7RHI0	-2.02927	1.21805	-1.71533	-0.442274	-0.745607	0.154352	-2.37521	-0.365979
NEMVEDRAFT_v1g238350	A7RHQ3	-0.7176	-0.187756	0.085831	0.515274	-0.00460942	-1.1122	0.62498	0.00690213
NEMVEDRAFT_v1g238352	A7RHQ7	-1.48346	-0.147077	-0.445913	0.933537	-0.289269	-0.986038	0.112964	-2.45782
NEMVEDRAFT_v1g238362	A7RHS5	-1.12138	0.220471	0.310495	-0.0680688	0.279946	-0.655211	0.959429	-0.352713
NEMVEDRAFT_v1g238375	A7RHU1	-3.26548	0.749622	-0.541603	0.485807	0.0935347	-0.238478	-0.152272	-1.62793
NEMVEDRAFT_v1g238395	A7RHX5	-2.99049	0.281134	-0.0481426	-0.824146	0.484526	1.01707	0.429163	-1.70151
NEMVEDRAFT_v1g238448	A7RI45	-1.51071	-0.399129	-0.350715	0.4191	-0.602397	-1.1981	0.505438	-0.957371
NEMVEDRAFT_v1g238471	A7RI88	-0.993986	0.506503	0.399405	0.0181466	0.22217	0.146249	1.09443	-0.904821
NEMVEDRAFT_v1g238481	A7RIA7	-1.45598	0.551847	-0.380482	-1.14433	0.276884	1.32639	-0.408316	0.291806
NEMVEDRAFT_v1g238515	A7RIF1	-5.10921	1.46668	0.86432	0.0269662	1.07479	-0.177792	1.56709	-1.11415
NEMVEDRAFT_v1g238521	A7RIG0	-2.50943	0.798305	-1.3516	-0.309298	-1.37971	0.415987	-0.635986	0.100342
NEMVEDRAFT_v1g238552	A7RIJ9	-2.46153	0.359046	-1.32634	-0.671265	-1.38219	1.40466	-0.480561	0.224516
NEMVEDRAFT_v1g238559	A7RIL0	0.874528	-0.546004	0.804506	0	0.415418	0	0.382661	0
NEMVEDRAFT_v1g238560	A7RIL3	-3.52993	-0.790645	-0.289374	0.665976	0.573442	-0.548511	-0.190118	-2.10046
NEMVEDRAFT_v1g238568	A7RIM2	-2.11126	-0.123653	-0.140579	1.1601	-0.77491	-1.06453	0.927276	-1.65602
NEMVEDRAFT_v1g238606	A7RIT0	-1.17023	-0.643439	-0.525137	0.629352	0.167172	-0.573618	-0.652061	-1.4677
NEMVEDRAFT_v1g238608	A7RIT1	-0.810956	-0.551336	-0.0672992	0.632544	0.381275	-0.670938	0.0587817	-0.731132
NEMVEDRAFT_v1g238618	A7RIU7	0.854076	-0.459081	-0.190954	0.469198	-0.712914	-0.72861	-0.329909	-0.410268
NEMVEDRAFT_v1g238629	A7RIW4	0.697608	-0.358688	0.177573	-0.810769	-0.273299	0.554543	0.0677335	1.39734
NEMVEDRAFT_v1g238699	A7RJ90	-1.98962	-0.143717	0.359372	0.789888	0.411407	-0.172652	1.1655	-2.20068
NEMVEDRAFT_v1g238704	A7RJ96	-0.678458	-0.144965	0.303977	0.439774	0.476813	-0.499887	0.626339	-0.765608
NEMVEDRAFT_v1g238706	A7RJ98	-1.71669	-0.162204	0.181899	0.649161	1.23582	-0.306232	-0.494837	-0.956337
NEMVEDRAFT_v1g238707	A7RJA0	-2.05894	-0.954585	-0.596763	1.24736	0.0182232	-1.57302	-0.296238	-1.81452
NEMVEDRAFT_v1g238725	A7RJC9	-1.71138	0.529488	-0.546376	0.215595	-0.253082	-0.564372	-0.125894	-1.18836
NEMVEDRAFT_v1g238733	A7RJE1	-6.44141	-6.41138	-0.0368386	0.372094	0.270227	0.143663	0.770152	0.170513
NEMVEDRAFT_v1g238754	A7RJI6	1.04499	0.467936	1.499	-2.13264	0.896449	2.02487	1.15577	2.61388
NEMVEDRAFT_v1g238755	A7RJI7	-1.32841	-0.547008	-0.0722199	0.51597	0.533703	-0.433095	0.0160661	-1.57555
NEMVEDRAFT_v1g238777	A7RJK8	0.82862	-0.404368	0.723535	0	0.571652	0	0.510861	0
NEMVEDRAFT_v1g238789	A7RJQ9	1.63067	-0.40386	0.738717	-1.69358	-1.09446	1.21438	-0.53997	2.45445
NEMVEDRAFT_v1g238853	A7RK27	1.1375	-0.246182	0.108988	0	-0.596456	0	-1.0821	0
NEMVEDRAFT_v1g238903	A7RKB4	-1.52787	-0.169367	0.482731	1.16102	1.01385	-0.742542	0.786131	-2.16477
NEMVEDRAFT_v1g238927	A7RKH9	1.21604	-0.492795	1.84483	-0.291164	1.47418	0.0475337	0.930612	0.828223
NEMVEDRAFT_v1g238968	A7RKQ2	0.726023	-0.135812	0.0110411	-0.871748	-0.499264	0.548942	-0.357957	1.2331
NEMVEDRAFT_v1g238978	A7RKR8	-1.52552	0.377325	-0.563972	0.852478	-0.423476	-1.00775	-0.00742362	-1.84538
NEMVEDRAFT_v1g239042	A7RL29	0.981753	-0.0749576	1.00457	0.28499	0.674067	-0.211773	0.641806	0.630127
NEMVEDRAFT_v1g239043	A7RL31	-1.81909	0.711109	-0.467889	0	-0.381972	0	0.17249	0
NEMVEDRAFT_v1g239137	A7RLI1	-0.873869	-0.0509529	-0.560394	0.355465	-0.141025	-0.0583507	-0.501106	-0.829613
NEMVEDRAFT_v1g239170	A7RLP2	-1.15257	0.316569	0.0415349	0	0.903684	0	-0.435849	0
NEMVEDRAFT_v1g239279	A7RM35	-3.68626	-1.06004	-1.34306	1.13295	-0.554656	-1.08428	-1.13008	-3.21067
NEMVEDRAFT_v1g239298	A7RM59	-0.799744	0.182416	-0.572154	0.0621116	-0.250003	0.45578	-0.442206	-0.962324
NEMVEDRAFT_v1g239405	A7RMN6	1.50902	-1.31427	1.6071	-1.26759	0.941235	0.0549834	0.791471	2.53845
NEMVEDRAFT_v1g239406	A7RMN7	-0.976913	-1.03003	-0.311226	0.548327	-0.245694	-0.474783	0.160034	-2.14168
NEMVEDRAFT_v1g239453	A7RMU6	-1.84913	0.354636	-0.48855	0.577057	-0.618408	0.071047	0.319406	-1.02601
NEMVEDRAFT_v1g239471	A7RMX7	1.08049	0.198365	0.362043	-0.567961	0.181458	1.00822	-0.61998	0.467631
NEMVEDRAFT_v1g239510	A7RN37	1.39166	-1.72945	1.07982	-0.109218	0.18691	-1.65125	0.823764	1.30127
NEMVEDRAFT_v1g239528	A7RN62	0.769274	0.133175	0.899254	-0.549615	0.625808	0.425322	0.342018	0.782181
NEMVEDRAFT_v1g239529	A7RN64	2.09568	-2.37784	2.44399	-1.69201	0.545728	-1.29889	1.41149	2.50732
NEMVEDRAFT_v1g239568	A7RNE1	-1.21173	0.379225	0.212684	-0.829149	0.674028	1.35531	0.324739	-0.0557358
NEMVEDRAFT_v1g239594	A7RNI5	-1.00969	-0.271865	0.686522	1.5127	1.13612	-1.08013	0.933553	-2.27445
NEMVEDRAFT_v1g239609	A7RNK6	-2.6451	2.46175	-0.193398	-0.937238	-1.69311	0.576952	1.04594	0.690163
NEMVEDRAFT_v1g239611	A7RNK9	-1.48591	0.181352	-0.902105	0.896151	-0.254387	-0.460208	-0.931463	-2.52343
NEMVEDRAFT_v1g239622	A7RNN6	-2.87256	0.376712	-1.14374	0.25823	-0.672424	-0.672777	-0.661054	-0.840303
NEMVEDRAFT_v1g239689	A7RP17	-0.864437	-0.455938	-0.666958	0.494692	-0.333437	-0.366654	-0.646588	-0.959937
NEMVEDRAFT_v1g239752	A7RPD3	-1.7151	0.131126	-0.649777	0.31652	-0.433667	-0.114028	-0.0724675	-1.64574
NEMVEDRAFT_v1g239764	A7RPE5	1.46506	0.00326696	0.466681	-0.600412	-0.398403	0.763736	-1.1936	0.289915
NEMVEDRAFT_v1g239804	A7RPL3	-7.69915	0.747519	-1.02148	-0.54131	-0.243034	-0.31612	-0.680185	-1.21762
NEMVEDRAFT_v1g239820	A7RPP4	-1.36983	0.4913	-1.07606	-0.0487903	-1.12449	0.334906	-0.574986	-1.74055
NEMVEDRAFT_v1g239824	A7RPP9	-1.27185	0.547185	0.579742	-0.322376	-0.0954774	1.07708	1.57325	0.172331
NEMVEDRAFT_v1g239871	A7RPY1	-2.03364	0.672302	0.515632	-0.219206	0.946991	-0.868583	0.910081	-0.172829
NEMVEDRAFT_v1g239915	A7RQ70	2.17751	-0.715123	2.82534	0.315133	2.50346	-0.753487	0.56771	0.545491
NEMVEDRAFT_v1g239967	A7RQH0	-1.2359	-1.46118	0.01714	0.629546	-0.164422	-1.35987	0.782931	-0.102773
NEMVEDRAFT_v1g239974	A7RQH9	-3.7575	2.05349	0.0204135	-0.708951	-0.303983	1.11431	1.08133	-1.56672
NEMVEDRAFT_v1g239997	A7RQL5	0.806969	-0.162052	0.697068	0	0.267727	0	0.679362	0
NEMVEDRAFT_v1g240068	A7RR20	-1.05774	-0.639004	-0.129027	0.477979	0.558776	-0.349171	-0.259066	-1.26674
NEMVEDRAFT_v1g240155	A7RRG1	-2.68947	0.565331	-0.509334	-0.580125	0.198871	0.989733	-0.298129	-2.00719
NEMVEDRAFT_v1g240215	A7RRN9	-1.41401	0.310634	0.0942289	0.34667	-0.00329226	0.0367843	0.87033	-1.75385
NEMVEDRAFT_v1g240233	A7RRR3	-6.68942	2.0657	0.876604	-0.147429	0.966237	0.0906733	1.78407	-1.78893
NEMVEDRAFT_v1g240246	A7RRT9	0.89362	-0.36171	0.335461	0	0.242182	0	-0.582427	0
NEMVEDRAFT_v1g240248	A7RRU6	0.618207	-0.157328	0.281394	-0.246536	-0.333416	-0.230977	0.332256	0.752911
NEMVEDRAFT_v1g240290	A7RRZ5	1.03103	-1.03444	0.795576	-0.496759	0.0675462	-0.457793	0.824209	1.58408
NEMVEDRAFT_v1g240356	A7RSA5	-3.37041	0.457097	-0.806739	-1.62859	-0.727543	1.93187	0.0391742	-0.908379
NEMVEDRAFT_v1g240423	A7RSQ2	1.00322	-0.263899	0.646006	-0.992904	-0.198659	1.30444	0.239146	0.576618
NEMVEDRAFT_v1g240452	A7RSW7	-0.625532	-0.12547	-0.521634	0.169355	-0.253361	0.508696	-0.389453	-0.920785
NEMVEDRAFT_v1g240518	A7RT95	-0.760066	-0.157887	-0.147942	0	0.282047	0	-0.0428928	0
NEMVEDRAFT_v1g240522	A7RT98	-2.06391	0.655067	0.0268755	0.115594	-0.970463	0.136327	1.1884	-1.11111
NEMVEDRAFT_v1g240545	A7RTE0	-2.18363	-0.216902	1.05471	-0.834437	0.944393	1.08085	1.94394	-0.315715
NEMVEDRAFT_v1g240559	A7RTF7	-0.838764	0.383401	-0.342079	0.729026	-0.238592	-2.81784	-0.0981274	-0.942838
NEMVEDRAFT_v1g240570	A7RTI0	-1.10665	-0.601525	0.753237	0.0257978	1.18592	-0.267752	0.976061	0.374945
NEMVEDRAFT_v1g240614	A7RTR4	-0.670414	-0.182585	0	0	0	0	0	0
NEMVEDRAFT_v1g240619	A7RTS2	0.735737	-0.362833	0.0460741	0	-0.378424	0	-0.299106	0
NEMVEDRAFT_v1g240670	A7RTZ1	-1.57012	0.255769	-0.0499023	-0.86245	-0.158873	1.51086	0.712141	-0.241684
NEMVEDRAFT_v1g240691	A7RU13	0.700382	0.476482	0.391501	-0.938242	-0.156358	0.278099	0.16156	1.10732
NEMVEDRAFT_v1g240720	A7RU50	-1.31833	-0.739446	-0.450692	1.05215	-0.575769	-0.952897	0.297399	-0.96147
NEMVEDRAFT_v1g240794	A7RUJ7	-1.17899	0.382024	0.356394	0.473879	0.780514	-0.327467	0.655964	-1.24167
NEMVEDRAFT_v1g240825	A7RUQ7	-1.90923	-0.571163	-0.434666	0.931672	0.249857	-0.642432	-0.311471	-3.06826
NEMVEDRAFT_v1g240861	A7RUX2	1.38761	-0.46233	1.09544	-0.463114	-0.0615101	-0.0218112	0.829322	0.721071
NEMVEDRAFT_v1g240864	A7RUX5	-1.64903	-0.241186	0.263922	0.270083	0.81926	-0.15398	0.490713	-1.12027
NEMVEDRAFT_v1g240887	A7RV33	-0.600997	-0.353804	-0.398	0	-0.0519064	0	-0.393051	0
NEMVEDRAFT_v1g240904	A7RV66	0.91731	-0.857234	0.478319	0.248797	0.120983	-1.32274	-0.205274	0.00926424
NEMVEDRAFT_v1g240970	A7RVH9	0.768844	0.304456	0.932759	-0.71502	0.463337	0.679296	0.619198	1.02776
NEMVEDRAFT_v1g241064	A7RVX5	1.1406	-0.0438382	-0.0841638	0.138471	-1.49305	0.137952	-0.782006	-0.622652
NEMVEDRAFT_v1g241089	A7RW22	-1.26491	0.17847	0.213206	0.332238	0.693077	-0.117618	0.432562	-0.884283
NEMVEDRAFT_v1g241098	A7RW43	1.32295	-0.589545	0.81603	-1.37439	-0.450548	0.390587	0.137387	2.41235
NEMVEDRAFT_v1g241128	A7RW82	-1.30863	-0.126762	-0.264574	0.883342	0.287482	-0.842499	-0.0852154	-2.05286
NEMVEDRAFT_v1g241148	A7RWC5	-1.46416	0.452302	-0.170336	0.574985	0.341506	-0.285665	0.0522905	-1.06877
NEMVEDRAFT_v1g241157	A7RWD9	1.1246	-0.208799	0.916346	-1.34063	0.22483	0.148564	0.161882	2.58204
NEMVEDRAFT_v1g241158	A7RWE1	-0.658073	0.349063	0	0	0	0	0	0
NEMVEDRAFT_v1g241170	A7RWH2	1.38406	-1.54687	0.835958	0.792993	0.457985	-1.73996	-0.22905	-0.136689
NEMVEDRAFT_v1g241212	A7RWP8	2.52115	-0.157776	1.68717	-2.21728	-0.303782	2.95109	0.233729	-2.6924
NEMVEDRAFT_v1g241218	A7RWR2	-1.72541	-0.866214	0.549096	0.606515	0.0253318	-0.132807	1.58075	-1.82185
NEMVEDRAFT_v1g241269	A7RX23	-2.56911	-0.159546	0.977593	0.556721	0.594331	0.678889	2.04356	-2.76686
NEMVEDRAFT_v1g241285	A7RX49	-1.37613	0.252437	-0.177457	-0.527677	0.0345506	0.651492	0.29854	0.348952
NEMVEDRAFT_v1g241466	A7RY14	-2.08897	0.947581	-0.0170653	0.243503	-0.119201	-0.369539	0.820035	-0.715505
NEMVEDRAFT_v1g241470	A7RY23	-0.718396	-0.188021	0.0529484	0.538847	0.309812	-0.299434	0.335548	-1.02298
NEMVEDRAFT_v1g241477	A7RY38	-1.45308	1.26324	-0.129273	-0.467386	-0.893158	0.292468	0.84632	0.369572
NEMVEDRAFT_v1g241497	A7RY71	-1.8728	-1.54328	-0.180435	1.33392	0.598566	-2.76253	-0.138594	-2.36403
NEMVEDRAFT_v1g241520	A7RYA6	-2.27782	0.468702	-0.523604	-1.24293	-0.252095	1.07897	-0.007766	0.0523358
NEMVEDRAFT_v1g241547	A7RYE7	-0.648415	-0.235298	-0.369668	0.445153	-0.145961	-0.403815	-0.304705	-1.22013
NEMVEDRAFT_v1g241557	A7RYG4	-0.927064	0.32556	0.690461	0	1.24416	0	0.511971	0
NEMVEDRAFT_v1g241565	A7RYH4	-1.23268	0.0933442	-0.403672	-0.651547	0.12266	0.769693	-0.384665	-0.709252
NEMVEDRAFT_v1g241567	A7RYH6	0.652834	-0.562919	0	0.160458	0	-0.424325	0	0.103598
NEMVEDRAFT_v1g241602	A7RYP1	2.80935	-1.40866	1.95414	-2.47451	-0.573091	1.86818	0.458875	3.0466
NEMVEDRAFT_v1g241655	A7RYX3	1.11453	-0.362356	0.980828	-0.0675613	0.873373	-0.908007	0.0738638	0.0359775
NEMVEDRAFT_v1g241670	A7RYZ8	1.60546	0.160559	1.05374	-2.29385	0.214525	2.57114	-0.958257	2.28236
NEMVEDRAFT_v1g241688	A7RZ25	-1.09633	-0.54605	0.205984	1.02033	-0.0315957	-1.65693	0.866178	-0.687603
NEMVEDRAFT_v1g241710	A7RZ65	-1.15281	-0.348855	0.273396	0.757156	0.219302	-0.672249	0.925545	-1.55441
NEMVEDRAFT_v1g241712	A7RZ68	-0.607809	-0.278163	-0.125793	0.485174	0.187538	-0.640481	-0.0473447	-0.446011
NEMVEDRAFT_v1g241741	A7RZD0	-1.55256	0.206408	0.990401	-0.181898	1.75201	-0.527341	0.803054	1.1747
NEMVEDRAFT_v1g241764	A7RZH7	-1.10481	-0.18187	-0.0902581	0.627459	0.609185	-0.41474	-0.214414	-1.06605
NEMVEDRAFT_v1g241780	A7RZK1	0.812351	-0.163511	0.723848	-0.756336	0.694322	1.09209	-0.0668419	0.597937
NEMVEDRAFT_v1g241781	A7RZK2	-1.23039	0.232442	-0.0465072	0.456684	0.442809	0.00262473	0.171655	-2.22878
NEMVEDRAFT_v1g241826	A7RZS6	0.763338	-0.0688654	0.975829	-1.45833	0.616111	0.948171	0.702192	2.07316
NEMVEDRAFT_v1g241828	A7RZS8	-1.45174	-0.444463	-0.220868	0.579593	0.499555	-0.312421	-0.287751	-0.913752
NEMVEDRAFT_v1g241874	A7RZZ8	1.31339	-0.154632	0.830466	-0.315667	0.100313	0.207485	0.0113456	0.645488
NEMVEDRAFT_v1g241939	A7S089	-2.28772	-0.900518	-0.359085	1.55021	0.251843	-1.75929	0.00101059	-3.43557
NEMVEDRAFT_v1g241960	A7S0C5	0.606996	0.0407386	0.287655	-0.163392	0.0341902	0.0625359	-0.171714	0.655254
NEMVEDRAFT_v1g241996	A7S0J0	0.620026	-0.0615388	0.835649	-0.364617	0.623847	0.750592	0.729538	0.408792
NEMVEDRAFT_v1g241997	A7S0J1	-0.902495	-0.0659224	-0.614522	0.37248	-0.29228	-0.545473	-0.536462	-0.665666
NEMVEDRAFT_v1g242034	A7S0Q5	-1.11252	0.313124	-0.0283975	0.586701	0.611751	-0.211289	-0.122213	-1.24109
NEMVEDRAFT_v1g242056	A7S0T1	1.41988	-1.41444	1.66072	-0.16914	0.520397	-1.67597	1.49176	1.04599
NEMVEDRAFT_v1g242089	A7S101	-1.82791	0.0120581	-0.00954379	0.487633	0.779632	-0.595724	-0.09198	-1.70684
NEMVEDRAFT_v1g242116	A7S150	-1.79725	-0.34694	0.66724	0.739962	0.544076	-0.557893	1.5044	-3.21984
NEMVEDRAFT_v1g242121	A7S155	-7.02727	3.86888	-0.222016	-2.40933	-3.32998	-3.00061	1.30015	2.58443
NEMVEDRAFT_v1g242274	A7S1Y1	-1.58305	-0.31088	-0.148048	1.05267	0.233943	-0.923556	0.306208	-1.76711
NEMVEDRAFT_v1g242282	A7S209	-0.684573	0.169071	-0.0961325	0.278428	0.101453	-0.0239031	0.116286	-1.23896
NEMVEDRAFT_v1g242295	A7S232	-1.26638	-0.067456	-0.509653	0	-0.562723	0	0.10652	0
NEMVEDRAFT_v1g242370	A7S2E1	-1.39304	1.17552	-0.273627	-0.859164	-0.279534	1.29044	0.218396	0.557644
NEMVEDRAFT_v1g242448	A7S2Q6	1.87611	-0.950789	2.02856	-1.30719	0.443761	-0.617426	1.18784	2.57387
NEMVEDRAFT_v1g242500	A7S317	-1.13017	-0.281548	-0.257371	0.623407	0.234421	-0.359669	-0.0649611	-0.659608
NEMVEDRAFT_v1g242597	A7S3G2	-9.4537	3.51251	0.955454	-2.32053	-1.67263	-2.16893	2.45938	2.66603
NEMVEDRAFT_v1g242624	A7S3J9	-1.88574	0.745906	0.893325	-0.0546864	1.91539	0.219028	0.412024	-0.264838
NEMVEDRAFT_v1g242628	A7S3K4	-1.22091	-0.370572	-0.41154	0.110965	0.257088	0.11006	-0.454727	-1.03931
NEMVEDRAFT_v1g242650	A7S3S4	1.49679	-1.1782	1.30103	-1.74917	-0.365716	0.635371	0.881788	2.6894
NEMVEDRAFT_v1g242660	A7S3U8	-1.63387	0.489944	-0.245417	0.278249	0.0702922	0.185786	0.261884	-1.37375
NEMVEDRAFT_v1g242667	A7S3V5	-1.1489	0.14429	-0.138902	0.652951	0.228904	0.051615	0.194446	-2.06158
NEMVEDRAFT_v1g242695	A7S403	-1.77536	0.373497	-0.453969	0.205887	0.141918	0.554353	-0.239272	-1.42258
NEMVEDRAFT_v1g242699	A7S406	-0.63079	-0.5188	-0.263555	0.616905	-0.00894841	-1.4998	-0.0953578	-0.694647
NEMVEDRAFT_v1g242703	A7S410	-2.71727	0.166886	-0.0271638	0.364858	0.0343979	-0.158885	0.813179	-2.39038
NEMVEDRAFT_v1g242707	A7S415	-1.21963	-0.265482	-0.185046	0.814869	-0.0660888	-0.935863	0.340691	-2.53388
NEMVEDRAFT_v1g242728	A7S460	3.90527	-3.11982	3.69357	-2.30161	0.566286	0.501521	0.801597	3.54042
NEMVEDRAFT_v1g242758	A7S4A8	-2.59885	-1.32403	-0.565825	1.04693	-0.563649	-1.75806	0.266831	-1.15046
NEMVEDRAFT_v1g242771	A7S4C6	1.55693	-0.756894	0.649023	-0.253217	-0.726799	-0.178416	0.22292	0.790372
NEMVEDRAFT_v1g242772	A7S4C7	0.704704	-0.995189	0.223044	-0.0294703	0.161695	-0.124422	-0.110924	0.668133
NEMVEDRAFT_v1g242774	A7S4C9	-2.11017	-0.309515	0.246858	1.12975	0.193436	-1.73926	1.07066	-1.60697
NEMVEDRAFT_v1g242795	A7S4H0	-1.2336	0.684708	0.147678	0.122827	-0.27343	0.341694	1.00593	-0.886854
NEMVEDRAFT_v1g242832	A7S4P7	1.47245	-0.824941	1.42389	-0.61233	0.222402	-0.749973	0.98664	1.24591
NEMVEDRAFT_v1g242858	A7S4U2	1.03779	-1.01965	0.622195	-0.333794	0.420583	-0.161766	0.0107101	0.802738
NEMVEDRAFT_v1g242878	A7S4X1	-1.54763	0.792334	-0.622115	-0.0446104	-0.734209	0.241335	0.0421813	-0.957155
NEMVEDRAFT_v1g242883	A7S4Y1	0.891871	-0.240564	1.12166	-0.00715239	1.14576	-0.185786	0.396064	0.599206
NEMVEDRAFT_v1g242959	A7S5A5	-1.33423	-0.215909	-0.0257561	0.628405	0.348127	-0.21431	0.319432	-1.72795
NEMVEDRAFT_v1g242962	A7S5A8	-1.58736	0.123906	0.758349	0.745264	0.89845	-0.158472	1.43569	-1.41906
NEMVEDRAFT_v1g242963	A7S5B0	-1.4352	0.148807	-0.0840914	0.166761	0.427057	0.947912	0.153775	-1.11803
NEMVEDRAFT_v1g243020	A7S5L0	-1.60721	0.401716	0.69597	0.603089	1.02702	-0.727132	1.20518	-0.463373
NEMVEDRAFT_v1g24303	A7SKQ5	3.68364	-5.83205	4.10427	1.13462	3.45912	0.610437	0	-4.91264
NEMVEDRAFT_v1g243096	A7S600	-2.2842	-0.0342982	-0.91997	0.189288	-0.984275	-0.324997	-0.124375	-1.09308
NEMVEDRAFT_v1g243143	A7S659	-3.66064	-2.92628	3.11863	-1.79384	4.59799	2.88891	0.170556	-2.20271
NEMVEDRAFT_v1g243257	A7S6S5	1.38248	-0.68063	1.16055	-1.13683	0.530279	0.0867785	0.211457	1.55327
NEMVEDRAFT_v1g243354	A7S7D2	-0.982641	0.811385	0.129405	-0.148769	0.701964	0.735062	0.0261831	-0.320503
NEMVEDRAFT_v1g243374	A7S7H3	-1.14893	-1.401	-0.0219811	1.11146	0.372693	-1.86942	0.228725	-1.75735
NEMVEDRAFT_v1g243430	A7S7T1	-1.93476	-0.113092	-0.319622	0.895375	0.244398	-0.727525	-0.00170455	-1.67295
NEMVEDRAFT_v1g243436	A7S7T7	1.05547	-0.0590636	0.623246	-1.38051	-0.29166	0.757131	0.198161	2.10638
NEMVEDRAFT_v1g243597	A7S8M7	-2.36386	0.684584	-0.108871	-0.0577944	0.426746	0.117501	0.31804	-2.22298
NEMVEDRAFT_v1g243632	A7S8T3	-2.92617	-1.05872	0.0601948	2.18449	0.390753	-3.24677	0.697314	-2.58465
NEMVEDRAFT_v1g243721	A7S9B6	-1.86559	-0.418516	0.507846	-0.0700521	0.780186	-0.943358	0.96109	0.572047
NEMVEDRAFT_v1g243793	A7S9N9	-1.21272	0.103141	-0.626693	0.13891	-0.28949	0.420086	-0.310188	-1.52081
NEMVEDRAFT_v1g243917	A7SA90	1.57827	-0.144251	0.647302	-1.0233	-0.190682	0.2198	-0.792104	1.56362
NEMVEDRAFT_v1g243929	A7SAA3	-1.69117	-1.04574	-0.795547	1.16542	-0.451814	-1.4946	-0.330813	-3.77875
NEMVEDRAFT_v1g243936	A7SAC1	-1.54152	-0.312721	0.458228	0.599284	0.00974463	-0.0205956	1.42907	-1.68468
NEMVEDRAFT_v1g243947	A7SAD9	-1.83048	-1.4956	-0.813011	0.593447	-0.871497	-1.79773	-0.0799066	-2.49274
NEMVEDRAFT_v1g243974	A7SAI6	-0.69613	-0.245972	0.34357	0	0.602305	0	0.491525	0
NEMVEDRAFT_v1g243989	A7SAK1	-1.92406	0.150475	0.87147	-0.884765	-0.475838	1.46661	2.12532	-0.578973
NEMVEDRAFT_v1g243990	A7SAK2	-1.65007	-0.0411702	-0.500042	0.549597	-0.233268	-0.993735	0.0178266	-0.983293
NEMVEDRAFT_v1g244000	A7SAM5	-1.13459	0.892169	-0.126623	-0.0891924	0.297884	0.0778426	-0.0929133	-0.165513
NEMVEDRAFT_v1g244007	A7SAP1	1.80588	-0.846248	1.64648	-0.769803	0.303268	-0.52902	0.764604	1.76584
NEMVEDRAFT_v1g244010	A7SAP5	0.806537	0.0429371	-0.0545819	-0.810513	-0.830263	0.579974	-0.402542	1.5694
NEMVEDRAFT_v1g244029	A7SAT1	-1.40049	-0.175763	0.366706	-0.910108	-0.110579	1.32796	1.27469	-0.432738
NEMVEDRAFT_v1g244035	A7SAT7	-1.92996	-0.836204	0.951643	0.835608	1.76264	-1.05704	0.908093	-0.567649
NEMVEDRAFT_v1g244087	A7SB79	-0.984605	0.185463	0.0102631	-0.0381948	0.0968703	0.0974184	0.375886	-0.773443
NEMVEDRAFT_v1g244108	A7SBD8	-2.09109	0.18151	0.0186967	0.186409	-0.186935	-0.390094	0.893493	-0.898679
NEMVEDRAFT_v1g244136	A7SBI1	-2.18906	-0.843552	-0.148572	0.724883	-0.0312147	-1.70642	0.630197	-2.06364
NEMVEDRAFT_v1g244138	A7SBJ3	-1.22981	0.242785	-0.417034	0.49742	-0.382604	-0.457354	0.167147	-0.82733
NEMVEDRAFT_v1g244177	A7SBS3	-1.18767	-1.02938	-0.059741	1.37157	0.787506	-1.66032	-0.401678	-1.4174
NEMVEDRAFT_v1g244196	A7SBV3	-2.00389	0.0559588	-0.308502	0.53107	0.490727	-1.42869	-0.337083	-1.65099
NEMVEDRAFT_v1g244257	A7SC81	-2.24791	-0.19427	-0.109539	-1.88896	0.363465	2.03458	0.210456	-0.0454565
NEMVEDRAFT_v1g244271	A7SCC1	-2.03369	0.59439	0.220503	0.498282	1.23249	-0.178838	-0.225416	-0.727154
NEMVEDRAFT_v1g244276	A7SCC7	-1.0437	-0.303828	0.115694	0.533895	0.25361	-0.369372	0.606655	-0.957869
NEMVEDRAFT_v1g244288	A7SCF5	-1.14925	-0.25147	-0.435169	0.616256	0.0795979	-0.293549	-0.364222	-1.27274
NEMVEDRAFT_v1g244307	A7SCI8	-1.35586	-0.703895	-0.425458	0.228005	-0.0154497	-0.0211562	-0.0980409	-1.03296
NEMVEDRAFT_v1g244361	A7SCT1	-2.29774	-1.0987	-0.297656	-0.151745	-0.584812	-0.372008	0.672964	-0.959086
NEMVEDRAFT_v1g244371	A7SCU6	-2.07023	-0.35175	0.305859	-0.309501	-0.125242	0.672736	1.32662	-1.30711
NEMVEDRAFT_v1g244378	A7SCW8	1.98011	0.361658	0.665326	-1.30119	-1.38941	1.64708	-0.969382	1.84214
NEMVEDRAFT_v1g244395	A7SCZ2	-1.21854	0.0228794	0.278971	-0.535097	-0.388189	0.857214	1.23269	-0.0647226
NEMVEDRAFT_v1g244402	A7SD00	0.757059	0.331017	-0.121587	-1.0225	-1.00105	1.43387	-0.39834	1.16107
NEMVEDRAFT_v1g244547	A7SDQ4	-0.752193	-0.263342	-0.137541	0.629715	0.126644	-0.77016	0.114938	-1.27236
NEMVEDRAFT_v1g244565	A7SDU7	1.13985	-0.273826	0.194489	-1.33175	-1.11671	0.662364	-0.143995	2.36088
NEMVEDRAFT_v1g244615	A7SE28	1.2397	-0.851222	0.932247	0.1043	0.602048	-0.255735	0.529221	1.05525
NEMVEDRAFT_v1g244659	A7SEA4	-1.66854	-0.392317	-0.687914	-0.349766	-0.48031	0.454816	-0.128735	-2.64906
NEMVEDRAFT_v1g244660	A7SEA6	-2.43373	-0.0447181	-0.192838	0.76725	-0.0554043	-1.43732	0.550759	-3.74211
NEMVEDRAFT_v1g244663	A7SEA9	-1.65746	0.39046	0.288761	-0.000793242	0.016061	0.176452	1.17852	-1.00187
NEMVEDRAFT_v1g244670	A7SEC1	-1.13046	0.102393	-0.544672	0.314226	-0.0439351	0.27366	-0.41696	-0.977856
NEMVEDRAFT_v1g244678	A7SEE1	-3.84236	-3.14644	0.749306	2.80724	1.88429	-2.0863	0.327063	-2.17429
NEMVEDRAFT_v1g244694	A7SEI2	-1.61501	-0.955694	-0.133495	0.00628254	0.244542	1.51129	0.335518	-1.58805
NEMVEDRAFT_v1g244724	A7SEM9	-2.23083	0.673611	-0.322116	-0.533002	-0.152462	0.66758	0.345322	-1.93538
NEMVEDRAFT_v1g244796	A7SEX3	1.30795	-1.59579	0.934169	0.970224	0.288622	-1.60641	0.776447	-0.63709
NEMVEDRAFT_v1g244806	A7SF03	1.51417	-0.998115	1.21295	0.452934	1.25212	-0.32636	-0.37426	-0.323912
NEMVEDRAFT_v1g244850	A7SF74	-0.762147	0.230397	-0.224471	0	0.0569654	0	0.0340806	0
NEMVEDRAFT_v1g244860	A7SFA1	-1.84476	0.43487	0.300775	0.366203	1.22977	-0.283483	0.0400801	-0.718709
NEMVEDRAFT_v1g244873	A7SFC6	-0.640541	-0.328546	-0.365016	0	0.225508	0	-0.719282	0
NEMVEDRAFT_v1g244885	A7SFE6	-1.22847	-0.19143	-0.627236	0.752398	-0.248206	-0.372445	-0.332247	-1.44076
NEMVEDRAFT_v1g244894	A7SFF9	-1.59264	0.890447	-0.440329	-0.652936	-0.176378	0.750875	-0.00171154	-0.133273
NEMVEDRAFT_v1g244928	A7SFL2	-1.12789	0.452037	0.678407	0.418829	1.37889	0.0462764	0.591788	-0.7913
NEMVEDRAFT_v1g244968	A7SFS9	1.08054	-0.93211	0.437743	0.0862284	-0.177385	-0.548274	0.095187	0.61466
NEMVEDRAFT_v1g244995	A7SFW0	-0.750698	-0.723161	-0.299452	0.957802	0.041738	-1.22343	-0.152621	-1.5633
NEMVEDRAFT_v1g245039	A7SG25	-0.849042	0.0213964	-0.584406	0	-0.322899	0	-0.401074	0
NEMVEDRAFT_v1g245053	A7SG44	1.81823	-1.47021	1.6461	-0.485065	-0.761974	-1.1948	0.467172	1.54308
NEMVEDRAFT_v1g245073	A7SG89	-1.03517	0.535267	-1.25361	0	-1.3711	0	-0.781263	0
NEMVEDRAFT_v1g245074	A7SG90	-1.33425	-0.167201	-0.0796514	1.27201	0.479567	-0.844092	-0.130642	-2.45867
NEMVEDRAFT_v1g245101	A7SGD8	-0.920934	-0.335165	-0.553601	0.720809	-0.325406	-0.477163	-0.223295	-1.13476
NEMVEDRAFT_v1g245107	A7SGF2	-3.97512	0.523487	0.286356	-1.56884	1.21001	2.00774	0.294351	-1.29195
NEMVEDRAFT_v1g245135	A7SGK3	-1.72376	-0.991187	-0.026906	1.09014	0.722479	-0.952583	0.0401157	-2.85516
NEMVEDRAFT_v1g245160	A7SGM7	-2.51718	-0.495286	0.377265	1.14346	1.32397	-1.28622	0.227647	-1.86037
NEMVEDRAFT_v1g245209	A7SGX7	-1.77584	0.519179	-0.161621	-0.0993975	0.239182	-1.07189	0.199913	0.573819
NEMVEDRAFT_v1g245219	A7SGZ6	-2.29935	0.445456	1.07031	0.876318	1.24332	-1.56487	1.74575	-1.43885
NEMVEDRAFT_v1g245220	A7SGZ7	-2.05176	-0.275444	0.546704	0.990306	0.766599	-2.36391	1.17881	-1.71955
NEMVEDRAFT_v1g245244	A7SH53	-1.33971	0.0656516	-0.213246	0.188128	-0.184187	0.378137	0.418347	-1.61565
NEMVEDRAFT_v1g245257	A7SH71	0.735788	0.311418	0.560927	0	0.208163	0	0.269952	0
NEMVEDRAFT_v1g245294	A7SHF6	-0.637341	-0.0854583	-0.467206	0.517808	-0.0955079	-0.519819	-0.566265	-1.55782
NEMVEDRAFT_v1g245354	A7SHS5	-1.40915	-0.948052	-0.434182	1.09572	0.20501	-1.2349	-0.322414	-2.02602
NEMVEDRAFT_v1g245400	A7SHZ1	0.613928	0.117552	0.163524	0	-0.179148	0	-0.223156	0
NEMVEDRAFT_v1g245407	A7SI06	0.637062	-0.0336068	0.359869	0	-0.0629679	0	0.324741	0
NEMVEDRAFT_v1g245466	A7SIA7	-2.19432	-2.63876	0.463874	1.9674	1.7686	-3.55493	-1.04492	-2.78677
NEMVEDRAFT_v1g245490	A7SII2	-3.21382	-1.11147	1.31489	-2.56528	2.48242	2.09708	0.139902	0.0918871
NEMVEDRAFT_v1g245491	A7SII3	-2.09209	-1.02076	-0.44379	1.37927	-0.00321296	-1.48518	0.0351377	-1.95223
NEMVEDRAFT_v1g245555	A7SIW5	-1.40318	0.283392	-0.247137	0.359254	-0.13335	0.181148	0.36427	-1.57479
NEMVEDRAFT_v1g245614	A7SJ78	-0.862796	0.267854	-0.439509	0.246925	-0.0898661	-0.597418	-0.312758	-0.266601
NEMVEDRAFT_v1g245642	A7SJD7	-0.97592	0.0205013	0.618049	-0.111176	1.20728	-0.17965	0.542756	-0.585116
NEMVEDRAFT_v1g245670	A7SJH8	-1.69091	-0.921748	0.235613	1.43585	0.830506	-1.30898	0.519814	-2.65788
NEMVEDRAFT_v1g245688	A7SJK4	-0.910393	-0.0642851	-0.11159	0.557972	-0.0200217	-0.0523802	0.34988	-1.83384
NEMVEDRAFT_v1g245689	A7SJK5	-1.86225	-0.148793	0.782411	0.697862	1.18411	-0.755974	1.28602	-1.00491
NEMVEDRAFT_v1g245715	A7SJP4	-1.98509	-0.892181	-0.166557	1.4695	0.676631	-1.82799	-0.249737	-2.75366
NEMVEDRAFT_v1g245733	A7SJR2	-1.81291	-0.263616	0.0434159	0.00309016	-0.0889094	0.614733	0.903776	-1.45525
NEMVEDRAFT_v1g245736	A7SJR7	0.636212	-0.0925598	0.681622	-1.13517	0.426699	0.726019	0.474299	1.53237
NEMVEDRAFT_v1g245809	A7SK49	-3.02493	-0.556016	-0.491105	1.20949	-0.37034	-1.47106	0.333441	-3.0765
NEMVEDRAFT_v1g245819	A7SK75	1.16051	-0.470886	1.05895	-0.87951	-0.0433268	-0.138982	0.798102	1.59126
NEMVEDRAFT_v1g245829	A7SK91	-1.46993	-0.00416731	-0.704029	-0.669908	-1.10951	1.32784	0.110845	-1.16948
NEMVEDRAFT_v1g245869	A7SKH7	0.756829	0.160038	0.839045	-0.723903	0.615526	0.550609	0.433117	1.08319
NEMVEDRAFT_v1g245872	A7SKI3	-1.32491	-0.332669	-0.113636	0.534723	0.549131	-0.389405	-0.100942	-0.758898
NEMVEDRAFT_v1g245881	A7SKJ5	-1.45562	-0.39433	0.827198	-1.16999	1.73147	1.79885	0.376517	0.11563
NEMVEDRAFT_v1g245888	A7SKK9	-1.74386	-0.63498	-0.553277	1.26391	-0.126208	-1.65787	-0.142919	-1.92389
NEMVEDRAFT_v1g245929	A7SKT9	-0.940212	-0.541184	-0.342871	0.924207	0.45737	-0.952634	-0.836424	-0.888802
NEMVEDRAFT_v1g245940	A7SKW6	0.901741	0.301539	0.316851	-0.962402	-0.358105	0.709924	-0.359004	1.52199
NEMVEDRAFT_v1g245957	A7SL03	1.51453	-0.0409607	-0.118756	-1.61938	-1.23249	2.04345	-1.86285	0.566463
NEMVEDRAFT_v1g245981	A7SL54	-3.34235	-0.714089	0.920538	0.340368	1.35066	0.0974213	1.50974	-1.66185
NEMVEDRAFT_v1g246111	A7SLZ2	1.0684	-1.02553	1.12031	-0.339893	0.615075	0.0586216	1.12044	1.28214
[truncated: 1,334 more rows]

## Sheet: Table S3
# the genes are aligned to swiss-prot database (UniProtKB/Swiss-Prot UniProt release 2020_02) filtered with e-value of 1e-05
Table S3: Changes in DNA regulatory landscape in response to heat exposure
		Lab cultured NV				Field conditioned NV
GeneID	Cluster	prestress	stress	r24h	r48h	prestress	stress	r24h	r48h	qseqid	sseqid	pident	length	mismatch	gapopen	qstart	qend	sstart	send	evalue	bitscore
11679	1	-21.0455	-21.0431	-21.7741	2.84773	9.14401	1.03325	0.461629	0.916399	jgi|JGI_CAGH11679.fwd|	sp|Q8K194|SNR27_MOUSE	61.76	68	26	0	444	647	88	155	9e-22	93.6
12640	1	-0.288741	-20.6512	2.67803	-21.4264	-8.75407	-20.5894	-8.14742	-20.93	jgi|JGI_CAGH12640.fwd|	sp|P62909|RS3_RAT	90	230	23	0	10	699	1	230	7e-143	406
13474	1	0.710471	-8.97071	0.0695674	0.129659	0.377982	1.18541	0.879725	-9.35752	jgi|JGI_CAGH13474.fwd|	sp|Q6GM78|ASGL1_XENLA	48.51	101	52	0	3	305	46	146	2e-27	108
11988	1	0.403184	-8.68245	0.32408	0.414522	-0.658376	0.390315	0.633839	-9.12791	jgi|JGI_CAGN11988.fwd|	sp|P46196|MK01_BOVIN	81.49	281	52	0	66	908	41	321	3e-169	481
15080	1	-1.53632	-23.3794	1.14597	1.36847	-0.350213	-9.54687	0.605474	0.313344	jgi|JGI_CAGN15080.fwd|	sp|Q04652|KELC_DROME	30.77	169	115	1	228	728	134	302	8e-15	78.2
16432	1	0.170832	-0.186835	-9.62245	1.15477	0.283211	-0.194183	2.20096	-9.30596	jgi|JGI_CAGN16432.fwd|	sp|Q4V7W3|HEXIM_XENLA	30	190	102	5	285	830	118	284	5e-13	70.9
16956	1	0.889845	-0.153432	-9.59943	0.216811	-0.960884	-0.522859	1.49171	-9.23498	jgi|JGI_CAGN16956.fwd|	sp|P62262|1433E_SHEEP	68.77	253	73	4	70	816	1	251	7e-114	335
17593	1	0.370193	-9.56085	0.387037	0.324696	0.892167	1.16284	0.960828	-9.93043	jgi|JGI_CAGN17593.fwd|	sp|Q9QYI5|DNJB2_MOUSE	63.64	99	34	1	62	352	4	102	1e-34	132
18826	1	1.20184	-0.919257	-9.4664	0.138007	-0.590269	0.10457	1.54915	-9.33233	jgi|JGI_CAGN18826.fwd|	sp|P52800|EFNB2_MOUSE	32.34	167	98	5	87	578	18	172	4e-16	80.1
20189	1	-8.34695	-6.88232	3.07475	3.08221	6.60214	8.41536	-7.94171	-7.72778	jgi|JGI_CAGN20189.fwd|	sp|P35433|PUR1_RAT	53.1	258	102	4	100	861	8	250	2e-83	266
20933	1	0.364786	-8.445	-0.16705	0.674484	1.13586	1.14969	1.35729	-9.06685	jgi|JGI_CAGN20933.fwd|	sp|P18258|TBA1_PARLI	98.83	256	3	0	91	858	1	256	1e-176	503
21316	1	0.871932	-0.662854	-8.53071	0.583058	-1.76383	-0.0936577	0.38279	-8.52244	jgi|JGI_CAGN21316.fwd|	sp|P12815|PDCD6_MOUSE	66.47	167	56	0	22	522	24	190	1e-79	243
21843	1	0.882656	-0.0458652	-8.68919	0.0756605	0.754521	0.765852	1.54778	-8.18706	jgi|JGI_CAGN21843.fwd|	sp|F1QXD3|ZDH15_DANRE	54.88	215	94	3	3	641	104	317	5e-67	218
24690	1	-21.7469	-20.0905	-21.4778	3.48898	6.67299	-20.3899	8.46722	-8.01454	jgi|JGI_CAGN24690.fwd|	sp|Q9QZU7|BODG_RAT	33.15	178	112	4	267	800	2	172	8e-26	108
11083	2	29.3229	-19.4437	-6.6176	-6.67658	5.90662	-5.45457	7.69955	-5.86806	jgi|JGI_CAGF11083.fwd|	sp|Q5FVD7|C4S2A_XENLA	56.76	74	28	2	88	306	1	71	2e-16	76.3
11401	2	-0.327263	-22.3961	-23.2146	2.71931	0	0	0	-22.8224	jgi|JGI_CAGF11401.fwd|	sp|P15206|CCNB_MARGL	49.03	257	105	7	134	832	5	259	5e-71	230
1180	2	8.39293	-21.013	-8.03773	-8.0967	6.02595	-5.57476	7.81711	-5.98759	jgi|JGI_CAGF1180.fwd|	sp|A5PMF6|GT251_DANRE	48.05	256	124	3	1	762	72	320	7e-73	239
3451	2	29.1665	-23.4739	-24.5843	-24.7015	10.3716	-23.8291	2.34429	1.65581	jgi|JGI_CAGF3451.fwd|	sp|Q63413|DX39B_RAT	87.2	211	27	0	96	728	23	233	8e-135	393
5710	2	-22.4577	10.2082	-21.6829	-21.793	22.0502	-8.5917	-22.3478	9.82516	jgi|JGI_CAGF5710.fwd|	sp|Q58CV6|KLDC3_BOVIN	53.53	269	120	3	3	803	7	272	3e-98	300
7208	2	29.3229	-19.4437	-6.6176	-6.67658	5.90662	-5.45457	7.69955	-5.86806	jgi|JGI_CAGH7208.fwd|	sp|Q26648|TKB1_STRPU	58.6	186	77	0	3	560	189	374	3e-66	218
16140	2	23.0422	-20.3765	-21.4706	-21.603	6.27077	-5.81917	8.06658	-6.2319	jgi|JGI_CAGN16140.fwd|	sp|Q9R0E1|PLOD3_MOUSE	50.21	237	117	1	4	714	102	337	2e-83	271
17396	2	7.94207	-20.6451	-21.5119	-21.615	-8.62588	-6.22846	-7.00291	-6.64256	jgi|JGI_CAGN17396.fwd|	sp|Q32TF8|EFHC2_DANRE	47.99	273	135	2	2	799	377	649	2e-77	255
19802	2	29.1665	-23.4739	-24.5843	-24.7015	10.3716	-23.8291	2.34429	1.65581	jgi|JGI_CAGN19802.fwd|	sp|Q2RFW1|PRMC_MOOTA	36.92	130	75	3	232	606	113	240	1e-10	64.3
22603	2	7.62201	-20.3942	-7.29757	-7.35654	5.4502	-5.00107	7.24331	-5.41272	jgi|JGI_CAGN22603.fwd|	sp|P53013|EF1A_CAEEL	82.8	279	42	1	42	878	1	273	2e-158	457
25535	2	8.45374	-21.0878	-22.2518	-22.3818	6.96839	-20.3847	-21.5611	8.86781	jgi|JGI_CAGN25535.rev|	sp|Q65ZX2|IF2_BORBP	36.84	133	80	1	126	524	65	193	2e-08	57.4
3461	3	0.27028	-8.58198	0.390509	0.289024	8.618	1.80382	1.2573	-9.06507	jgi|JGI_CAAB3461.fwd|	sp|Q03123|T2FB_XENLA	50.45	224	96	6	80	712	7	228	1e-56	187
3946	3	0.476828	0.568927	-9.81079	0.290531	1.13447	-8.92472	2.02751	0.360327	jgi|JGI_CAAB3946.fwd|	sp|Q1JP61|KDM8_BOVIN	26.34	224	144	8	106	723	149	369	3e-12	68.9
8100	3	0.550458	-6.90184	1.83961	-21.4688	6.19723	8.0105	-7.61965	-6.15759	jgi|JGI_CAAB8100.fwd|	sp|Q5RC59|BT3L4_PONAB	60.32	63	22	1	2	181	95	157	3e-12	65.5
3404	3	0.50064	0.402806	-8.51832	0.696235	21.0781	-7.43513	-21.3389	2.31307	jgi|JGI_CAAD3404.rev|	sp|Q08916|YP142_YEAST	31.91	94	58	1	60	341	16	103	1e-08	53.1
10433	3	0.142276	0.574024	-9.15578	0.738544	8.20546	0.190335	0.417925	0.401097	jgi|JGI_CAGF10433.fwd|	sp|A0JPI9|LR74A_RAT	45.88	170	89	2	155	661	48	215	9e-38	141
10968	3	-0.0676076	1.0931	0.449398	-8.68862	0.481597	-8.14023	1.26653	0.632325	jgi|JGI_CAGF10968.fwd|	sp|Q9D119|PPR27_MOUSE	41.33	75	43	1	555	779	38	111	3e-12	66.6
11031	3	-0.278572	-7.84879	0.957367	1.05437	7.88561	0.563051	-1.24961	1.23226	jgi|JGI_CAGF11031.fwd|	sp|Q80U96|XPO1_RAT	73.96	265	68	1	2	793	667	931	1e-138	423
11386	3	7.20727	-5.90748	-7.03049	-7.08951	5.75174	-5.30369	7.54538	-5.71376	jgi|JGI_CAGF11386.fwd|	sp|Q99758|ABCA3_HUMAN	40.41	245	139	2	59	778	240	482	7e-42	159
1569	3	1.18707	-8.58573	0.220592	-1.49604	-0.280219	-8.93867	1.08909	0.352656	jgi|JGI_CAGF1569.fwd|	sp|P16580|GLNA_CHICK	72.5	160	44	0	2	481	203	362	5e-81	254
1904	3	0.3276	-8.83036	0.202441	0.488268	9.2117	0.827861	0.668809	0.308563	jgi|JGI_CAGF1904.fwd|	sp|O89086|RBM3_MOUSE	54.93	71	31	1	62	271	7	77	1e-16	78.6
13061	3	0.428238	0.0538352	0.548266	-8.38493	-0.582009	-8.11151	0.843453	0.556016	jgi|JGI_CAGH13061.fwd|	sp|Q8BYK4|RDH12_MOUSE	40.76	157	87	1	48	518	163	313	5e-28	113
8594	3	-0.182695	-8.40228	1.06454	0.254268	8.71637	0.431984	0.613569	0.323135	jgi|JGI_CAGH8594.fwd|	sp|A0A1B0GUS4|UB2L5_HUMAN	85.47	117	17	0	2	352	38	154	4e-53	174
13943	3	-0.314165	-9.36253	-1.36534	1.82005	9.3299	-0.79004	2.26678	-1.00248	jgi|JGI_CAGN13943.fwd|	sp|P40692|MLH1_HUMAN	48.68	304	125	6	57	893	378	675	1e-56	199
14440	3	-1.36425	-8.77829	1.61703	1.93859	1.49389	0.395008	-9.93861	1.13585	jgi|JGI_CAGN14440.fwd|	sp|O35136|NCAM2_MOUSE	27.37	285	170	12	1	795	361	628	2e-15	79.7
14523	3	1.11705	-8.50081	-0.0509363	0.107816	-0.625845	1.54013	-9.52632	-0.001682	jgi|JGI_CAGN14523.fwd|	sp|P08537|TBA_XENLA	94.12	255	15	0	64	828	1	255	1e-167	479
15161	3	0.731045	-0.890146	-8.41959	0.947607	7.10837	1.37908	0.232783	-0.623047	jgi|JGI_CAGN15161.fwd|	sp|Q9GKL8|CATL1_CHLAE	55.84	197	78	3	117	695	26	217	7e-72	229
15755	3	8.089	-7.14419	-7.90347	-7.96245	8.16158	0.711737	1.02172	1.24416	jgi|JGI_CAGN15755.fwd|	sp|G8HTB6|ZPP_ACRMI	35.29	102	62	3	3	302	191	290	1e-10	60.8
15829	3	-0.48514	0.0681512	-8.95751	1.53872	8.27271	-0.691251	2.33476	-0.500563	jgi|JGI_CAGN15829.fwd|	sp|Q98ST7|MOXD1_CHICK	38.75	240	139	5	99	815	25	257	1e-44	164
17612	3	-0.314165	-9.36253	-1.36534	1.82005	9.3299	-0.79004	2.26678	-1.00248	jgi|JGI_CAGN17612.fwd|	sp|P33198|IDHP_PIG	67.33	251	80	1	86	838	1	249	9e-117	349
18622	3	8.33591	-7.03553	-8.01235	-8.07133	6.16975	-5.71902	7.94954	-6.13132	jgi|JGI_CAGN18622.fwd|	sp|B1A8Z2|CIB1_SHEEP	46.56	189	94	3	6	551	1	189	3e-52	175
18691	3	1.20766	-9.29246	1.05564	-10.0242	9.00012	0.722908	-0.875504	1.99626	jgi|JGI_CAGN18691.fwd|	sp|P11833|TBB_PARLI	99.64	274	1	0	56	877	1	274	0	533
19225	3	0.192584	0.399029	-9.41633	0.665806	8.20682	0.675343	2.27812	-8.93661	jgi|JGI_CAGN19225.fwd|	sp|Q8C8N2|SCAI_MOUSE	45.18	197	106	2	1	588	405	600	2e-56	195
19729	3	-0.429048	-9.97742	1.02068	1.42756	2.34692	2.12998	-10.9854	0.604178	jgi|JGI_CAGN19729.fwd|	sp|P31401|VATB_MANSE	89.53	277	28	1	38	865	12	288	0	515
21408	3	0.0783303	-8.52242	1.00339	0.736651	6.96515	8.77804	-8.63216	-8.14755	jgi|JGI_CAGN21408.fwd|	sp|O55125|NIPS1_MOUSE	51.77	282	125	6	3	821	5	284	6e-94	286
21470	3	0.552894	-8.67749	-0.454327	1.02248	7.77807	3.59687	-0.271778	-8.75038	jgi|JGI_CAGN21470.fwd|	sp|O89086|RBM3_MOUSE	54.93	71	31	1	68	277	7	77	2e-16	78.6
21900	3	1.50705	-8.08095	0.620556	-8.86497	7.95274	1.2014	0.464616	0.334517	jgi|JGI_CAGN21900.fwd|	sp|Q6PD03|2A5A_MOUSE	87.91	91	11	0	517	789	125	215	4e-59	130
22192	3	0.937389	-8.46762	-0.498577	0.307742	-0.167485	-8.16951	0.758216	0.397575	jgi|JGI_CAGN22192.fwd|	sp|Q13506|NAB1_HUMAN	47.67	86	44	1	350	604	235	320	1e-16	82.8
22269	3	-0.314165	-9.36253	-1.36534	1.82005	9.3299	-0.79004	2.26678	-1.00248	jgi|JGI_CAGN22269.fwd|	sp|Q7T1R4|FOXA2_XENTR	87.8	123	14	1	239	607	132	253	4e-75	242
22776	3	0.559143	-0.0278444	-8.89268	0.489465	8.20938	0.451476	1.35717	-0.094806	jgi|JGI_CAGN22776.fwd|	sp|P18503|CAS4_EPHMU	31.82	132	74	7	361	756	210	325	2e-08	58.2
22883	3	-0.00871148	-8.43155	0.585194	0.570184	8.86992	0.505719	0.592474	0.51651	jgi|JGI_CAGN22883.fwd|	sp|Q8IUC8|GLT13_HUMAN	48.83	213	101	6	1	636	344	549	6e-55	191
23682	3	0.27028	-8.58198	0.390509	0.289024	8.618	1.80382	1.2573	-9.06507	jgi|JGI_CAGN23682.fwd|	sp|Q99578|RIT2_HUMAN	68.97	174	54	0	116	637	12	185	9e-72	226
24795	3	7.54449	-6.7021	-7.54095	-7.59994	8.14022	0.581868	1.20362	1.17965	jgi|JGI_CAGN24795.fwd|	sp|Q62941|ZNT2_RAT	56.54	214	74	1	3	644	123	317	1e-60	199
25823	3	0.140744	0.684931	-11.2511	0.361632	10.8545	0.63042	0.691013	0.301192	jgi|JGI_CAGN25823.fwd|	sp|P28094|WNT1_STRPU	48.05	154	75	1	2	463	75	223	1e-44	156
27252	3	0.833178	-9.03347	0.0796625	-0.0735196	8.93146	1.27127	0.912701	-0.728456	jgi|JGI_CAGN27252.fwd|	sp|A4IHS2|BOP1_XENTR	55.04	238	107	0	26	739	376	613	5e-97	305
2251	4	29.4917	-19.5947	-21.1965	-21.3204	6.62723	-20.1412	8.42709	-20.7695	jgi|JGI_CAAB2251.fwd|	sp|Q66IJ0|NUP35_XENTR	51.87	187	80	4	258	800	75	257	3e-49	171
5231	4	29.7611	-20.092	-21.6995	-21.766	6.72047	-20.5406	8.51764	-21.1248	jgi|JGI_CAAD5231.fwd|	sp|Q90Z10|RL13_DANRE	69.07	194	60	0	45	626	1	194	6e-86	260
11906	4	-1.0935	-21.5699	1.52985	-23.2635	22.882	-22.5669	2.84683	-22.8035	jgi|JGI_CAGF11906.fwd|	sp|P0CG53|UBB_BOVIN	99.18	245	2	0	74	808	1	245	2e-170	480
2515	4	25.5336	-19.5222	-21.2938	-21.271	21.041	-20.5251	8.72445	-21.0494	jgi|JGI_CAGF2515.fwd|	sp|P62262|1433E_SHEEP	68.65	252	73	4	94	837	1	250	3e-113	333
11308	4	8.01258	-20.8417	-8.00818	-8.06715	21.2347	-20.7929	8.93654	-21.2668	jgi|JGI_CAGH11308.fwd|	sp|P00767|CTRB_BOVIN	44.07	236	121	4	48	749	14	240	1e-61	200
4591	4	9.233	-21.9151	-9.2556	-9.31457	22.4541	-21.8573	10.2388	-22.6018	jgi|JGI_CAGH4591.fwd|	sp|Q76NI1|KNDC1_HUMAN	42.58	155	88	1	3	464	1594	1748	4e-38	149
7659	4	8.98605	-21.8523	-23.0873	-23.1017	22.4558	-22.1797	10.2388	-22.4898	jgi|JGI_CAGH7659.fwd|	sp|P21266|GSTM3_HUMAN	41.94	155	89	1	2	466	70	223	1e-34	130
11286	4	7.90476	-20.6629	-7.96746	-8.02643	21.3672	-20.3433	9.02925	-21.6219	jgi|JGI_CAGN11286.fwd|	sp|Q19958|STO2_CAEEL	66.83	208	69	0	171	794	121	328	1e-86	270
19467	4	25.503	-19.4756	-21.3662	-21.4923	21.3069	-20.8329	9.01334	-21.336	jgi|JGI_CAGN19467.fwd|	sp|Q7KW14|CCDCX_DROME	29.05	210	140	1	27	656	580	780	2e-21	99.4
21419	4	8.12183	-20.8695	-7.89192	-7.95089	6.43448	-19.9493	8.22321	-20.656	jgi|JGI_CAGN21419.fwd|	sp|P20478|GLNA2_DROME	64.68	269	92	2	46	849	1	267	2e-132	387
21541	4	29.372	-20.5109	-22.2157	-22.2988	22.0634	-21.6137	9.73573	-22.0054	jgi|JGI_CAGN21541.fwd|	sp|Q6DFW4|NOP58_MOUSE	66.9	281	92	1	4	846	10	289	3e-113	343
21819	4	8.82751	-21.4148	-23.0648	-23.2089	21.795	-21.3253	9.65111	-21.9678	jgi|JGI_CAGN21819.fwd|	sp|Q7ZWN0|LMF2_XENLA	60.07	283	111	1	8	856	6	286	4e-105	328
24188	4	7.97592	-20.8327	-7.83054	-7.88951	6.63567	-19.9578	8.42556	-20.8325	jgi|JGI_CAGN24188.fwd|	sp|P05153|PCKGC_CHICK	57.32	246	100	2	62	796	5	246	8e-92	290
25966	4	1.30521	-21.3316	-8.36242	0.283337	21.7394	-21.5084	9.41374	-8.07379	jgi|JGI_CAGN25966.fwd|	sp|Q04652|KELC_DROME	27.93	179	114	9	163	666	158	332	4e-07	55.5
14259	4	7.82496	-21.0137	-7.8531	-7.91207	21.5195	-20.8001	8.85044	-21.4882	jgi|JGI_CAIC14259.fwd|	sp|Q9VAU9|ZN330_DROME	72.36	123	34	0	1	369	116	238	9e-61	199
17590	5	29.8065	-22.2042	-22.3217	-22.3817	10.0471	0.775576	-24.3008	3.22915	jgi|JGI_CAGN17590.fwd|	sp|P20478|GLNA2_DROME	69.74	271	80	1	1	813	53	321	7e-145	418
22491	5	28.1398	-19.7551	-20.5819	-20.7198	-7.55067	-5.15531	-5.92944	-5.56874	jgi|JGI_CAGN22491.fwd|	sp|P18258|TBA1_PARLI	97.72	263	6	0	99	887	1	263	4e-180	512
23405	5	28.1398	-19.7551	-20.5819	-20.7198	-7.55067	-5.15531	-5.92944	-5.56874	jgi|JGI_CAGN23405.fwd|	sp|Q5RBA5|SQSTM_PONAB	40.35	171	85	4	136	603	3	171	4e-33	130
23205	1	0.813204	-10.1064	-0.222298	0.439802	-0.760495	0.553172	0.467986	-10.2451	#N/A	#N/A	#N/A	#N/A	#N/A	#N/A	#N/A	#N/A	#N/A	#N/A	#N/A	#N/A
25945	1	0.415338	-7.30233	0.447976	0.525688	-0.90764	1.46566	-0.704479	-7.47539	#N/A	#N/A	#N/A	#N/A	#N/A	#N/A	#N/A	#N/A	#N/A	#N/A	#N/A	#N/A
28861	1	-1.06426	-20.8921	-7.76817	2.98944	5.54536	-5.09734	7.33046	-7.84962	#N/A	#N/A	#N/A	#N/A	#N/A	#N/A	#N/A	#N/A	#N/A	#N/A	#N/A	#N/A
33581	1	0.487806	-8.4564	0.584224	-0.596773	-0.111907	0.131707	1.2803	-9.22717	#N/A	#N/A	#N/A	#N/A	#N/A	#N/A	#N/A	#N/A	#N/A	#N/A	#N/A	#N/A
37133	1	0.247785	-7.34701	0.285545	0.726622	-1.23741	0.525404	0.104069	-7.94292	#N/A	#N/A	#N/A	#N/A	#N/A	#N/A	#N/A	#N/A	#N/A	#N/A	#N/A	#N/A
37597	1	0.402467	0.853606	-11.3096	-0.131832	-1.48389	-0.264518	0.541222	-11.1584	#N/A	#N/A	#N/A	#N/A	#N/A	#N/A	#N/A	#N/A	#N/A	#N/A	#N/A	#N/A
39380	1	1.1009	-8.0708	-0.079728	-0.410463	-0.274541	1.32345	0.508563	-8.61726	#N/A	#N/A	#N/A	#N/A	#N/A	#N/A	#N/A	#N/A	#N/A	#N/A	#N/A	#N/A
39697	1	-0.288741	-20.6512	2.67803	-21.4264	-8.75407	-20.5894	-8.14742	-20.93	#N/A	#N/A	#N/A	#N/A	#N/A	#N/A	#N/A	#N/A	#N/A	#N/A	#N/A	#N/A
41720	1	-0.5048	0.125105	-8.86179	1.53482	0.226147	0.592891	1.53586	-9.06401	#N/A	#N/A	#N/A	#N/A	#N/A	#N/A	#N/A	#N/A	#N/A	#N/A	#N/A	#N/A
41849	1	3.90368	-22.7109	-9.62842	-1.60671	6.26168	-5.81052	8.04916	-7.03881	#N/A	#N/A	#N/A	#N/A	#N/A	#N/A	#N/A	#N/A	#N/A	#N/A	#N/A	#N/A
43296	1	-20.567	-6.25542	-21.8279	2.42418	8.60919	0.156673	1.43996	0.692393	#N/A	#N/A	#N/A	#N/A	#N/A	#N/A	#N/A	#N/A	#N/A	#N/A	#N/A	#N/A
44263	1	1.34127	-9.67502	-10.2274	0.889384	9.11994	3.24786	0.747369	-9.88137	#N/A	#N/A	#N/A	#N/A	#N/A	#N/A	#N/A	#N/A	#N/A	#N/A	#N/A	#N/A
48852	1	0.780509	-8.97526	-0.755379	0.303069	1.87614	-0.147229	2.55865	-9.63679	#N/A	#N/A	#N/A	#N/A	#N/A	#N/A	#N/A	#N/A	#N/A	#N/A	#N/A	#N/A
50751	1	0.329109	-8.95312	0.0731372	1.16632	-1.98116	1.60837	-9.727	-9.60855	#N/A	#N/A	#N/A	#N/A	#N/A	#N/A	#N/A	#N/A	#N/A	#N/A	#N/A	#N/A
52736	1	0.360516	0.216792	-9.52219	0.525843	-0.248781	0.125035	1.60215	-9.40869	#N/A	#N/A	#N/A	#N/A	#N/A	#N/A	#N/A	#N/A	#N/A	#N/A	#N/A	#N/A
53520	1	0.000207518	-8.36838	1.36146	0.408799	-0.306304	3.29732	-8.93336	-8.23005	#N/A	#N/A	#N/A	#N/A	#N/A	#N/A	#N/A	#N/A	#N/A	#N/A	#N/A	#N/A
55770	1	0.360516	0.216792	-9.52219	0.525843	-0.248781	0.125035	1.60215	-9.40869	#N/A	#N/A	#N/A	#N/A	#N/A	#N/A	#N/A	#N/A	#N/A	#N/A	#N/A	#N/A
56041	1	-0.732016	1.26353	0.965673	-12.395	-1.4315	-1.17255	0.593341	-12.1142	#N/A	#N/A	#N/A	#N/A	#N/A	#N/A	#N/A	#N/A	#N/A	#N/A	#N/A	#N/A
57781	1	0.0118883	-8.99722	0.639806	0.428142	-0.854421	0.439549	0.602495	-9.93875	#N/A	#N/A	#N/A	#N/A	#N/A	#N/A	#N/A	#N/A	#N/A	#N/A	#N/A	#N/A
57784	1	-0.219475	-9.32337	0.205702	1.06264	-0.906632	0.858495	0.419647	-10.5485	#N/A	#N/A	#N/A	#N/A	#N/A	#N/A	#N/A	#N/A	#N/A	#N/A	#N/A	#N/A
59740	1	0.247785	-7.34701	0.285545	0.726622	-1.23741	0.525404	0.104069	-7.94292	#N/A	#N/A	#N/A	#N/A	#N/A	#N/A	#N/A	#N/A	#N/A	#N/A	#N/A	#N/A
59964	1	1.50007	-8.83257	0.222115	-1.23713	-2.18547	0.74573	-1.61813	-8.90864	#N/A	#N/A	#N/A	#N/A	#N/A	#N/A	#N/A	#N/A	#N/A	#N/A	#N/A	#N/A
61965	1	-21.0455	-21.0431	-21.7741	2.84773	9.14401	1.03325	0.461629	0.916399	#N/A	#N/A	#N/A	#N/A	#N/A	#N/A	#N/A	#N/A	#N/A	#N/A	#N/A	#N/A
62530	1	0.710471	-8.97071	0.0695674	0.129659	0.377982	1.18541	0.879725	-9.35752	#N/A	#N/A	#N/A	#N/A	#N/A	#N/A	#N/A	#N/A	#N/A	#N/A	#N/A	#N/A
65448	1	1.43839	-1.15407	-9.04366	-0.0174267	-0.84835	0.264116	1.198	-8.90588	#N/A	#N/A	#N/A	#N/A	#N/A	#N/A	#N/A	#N/A	#N/A	#N/A	#N/A	#N/A
65567	1	-7.44331	-6.28114	-21.3452	3.83332	-0.434702	1.06479	1.08204	-8.54731	#N/A	#N/A	#N/A	#N/A	#N/A	#N/A	#N/A	#N/A	#N/A	#N/A	#N/A	#N/A
68674	1	1.20184	-0.919257	-9.4664	0.138007	-0.590269	0.10457	1.54915	-9.33233	#N/A	#N/A	#N/A	#N/A	#N/A	#N/A	#N/A	#N/A	#N/A	#N/A	#N/A	#N/A
70065	1	0.487806	-8.4564	0.584224	-0.596773	-0.111907	0.131707	1.2803	-9.22717	#N/A	#N/A	#N/A	#N/A	#N/A	#N/A	#N/A	#N/A	#N/A	#N/A	#N/A	#N/A
73349	1	0.131673	-9.31533	-0.905895	1.07499	1.81239	-0.203945	2.64628	-10.2257	#N/A	#N/A	#N/A	#N/A	#N/A	#N/A	#N/A	#N/A	#N/A	#N/A	#N/A	#N/A
73845	1	0.360516	0.216792	-9.52219	0.525843	-0.248781	0.125035	1.60215	-9.40869	#N/A	#N/A	#N/A	#N/A	#N/A	#N/A	#N/A	#N/A	#N/A	#N/A	#N/A	#N/A
74177	1	0.828559	-8.5426	0.122129	-0.0483226	-0.932015	0.595909	0.422624	-9.01163	#N/A	#N/A	#N/A	#N/A	#N/A	#N/A	#N/A	#N/A	#N/A	#N/A	#N/A	#N/A
76571	1	0.366153	-22.6112	-9.66661	1.47091	0.204976	-9.09749	1.45715	0.372596	#N/A	#N/A	#N/A	#N/A	#N/A	#N/A	#N/A	#N/A	#N/A	#N/A	#N/A	#N/A
76863	1	-0.5048	0.125105	-8.86179	1.53482	0.226147	0.592891	1.53586	-9.06401	#N/A	#N/A	#N/A	#N/A	#N/A	#N/A	#N/A	#N/A	#N/A	#N/A	#N/A	#N/A
77869	1	0.505534	-7.44079	0.519906	0.236626	-1.03058	0.667785	-0.112907	-7.54347	#N/A	#N/A	#N/A	#N/A	#N/A	#N/A	#N/A	#N/A	#N/A	#N/A	#N/A	#N/A
81286	1	-8.29748	-20.368	2.96412	2.64918	0	0	-21.3687	-20.8071	#N/A	#N/A	#N/A	#N/A	#N/A	#N/A	#N/A	#N/A	#N/A	#N/A	#N/A	#N/A
81301	1	8.31194	-7.01205	-7.72169	-7.78066	-7.06907	-4.66158	-5.4349	-5.07298	#N/A	#N/A	#N/A	#N/A	#N/A	#N/A	#N/A	#N/A	#N/A	#N/A	#N/A	#N/A
83186	1	0.505534	-7.44079	0.519906	0.236626	-1.03058	0.667785	-0.112907	-7.54347	#N/A	#N/A	#N/A	#N/A	#N/A	#N/A	#N/A	#N/A	#N/A	#N/A	#N/A	#N/A
83332	1	-0.793395	-20.1118	-7.59564	1.95353	6.87752	-20.3805	8.67015	-7.81194	#N/A	#N/A	#N/A	#N/A	#N/A	#N/A	#N/A	#N/A	#N/A	#N/A	#N/A	#N/A
84426	1	0.614404	0.722184	-0.070062	-8.62186	6.52673	-7.13978	2.27127	-20.6094	#N/A	#N/A	#N/A	#N/A	#N/A	#N/A	#N/A	#N/A	#N/A	#N/A	#N/A	#N/A
84527	1	0.0946328	-8.50314	0.857445	0.259033	-0.441315	0.503682	0.527201	-8.94525	#N/A	#N/A	#N/A	#N/A	#N/A	#N/A	#N/A	#N/A	#N/A	#N/A	#N/A	#N/A
85497	1	1.156	-7.81717	-8.59102	0.83973	0.387334	1.09516	1.70323	-8.59442	#N/A	#N/A	#N/A	#N/A	#N/A	#N/A	#N/A	#N/A	#N/A	#N/A	#N/A	#N/A
85870	1	0.604699	-7.86173	0.313433	0.0673927	-0.0776205	1.38926	0.420495	-8.33584	#N/A	#N/A	#N/A	#N/A	#N/A	#N/A	#N/A	#N/A	#N/A	#N/A	#N/A	#N/A
86726	1	0.604699	-7.86173	0.313433	0.0673927	-0.0776205	1.38926	0.420495	-8.33584	#N/A	#N/A	#N/A	#N/A	#N/A	#N/A	#N/A	#N/A	#N/A	#N/A	#N/A	#N/A
87408	1	0.780509	-8.97526	-0.755379	0.303069	1.87614	-0.147229	2.55865	-9.63679	#N/A	#N/A	#N/A	#N/A	#N/A	#N/A	#N/A	#N/A	#N/A	#N/A	#N/A	#N/A
93363	1	0.710471	-8.97071	0.0695674	0.129659	0.377982	1.18541	0.879725	-9.35752	#N/A	#N/A	#N/A	#N/A	#N/A	#N/A	#N/A	#N/A	#N/A	#N/A	#N/A	#N/A
97137	1	0.772446	0.485707	-8.79562	-0.369406	-0.38767	0.270245	1.19702	-8.40024	#N/A	#N/A	#N/A	#N/A	#N/A	#N/A	#N/A	#N/A	#N/A	#N/A	#N/A	#N/A
97317	1	-1.53632	-23.3794	1.14597	1.36847	-0.350213	-9.54687	0.605474	0.313344	#N/A	#N/A	#N/A	#N/A	#N/A	#N/A	#N/A	#N/A	#N/A	#N/A	#N/A	#N/A
98091	1	0.170825	-0.186822	-9.62244	1.15477	-0.960908	-0.522874	1.4917	-9.50904	#N/A	#N/A	#N/A	#N/A	#N/A	#N/A	#N/A	#N/A	#N/A	#N/A	#N/A	#N/A
98351	1	-0.0325883	-8.59679	0.512943	0.6677	0.18137	0.273597	1.16069	-9.20838	#N/A	#N/A	#N/A	#N/A	#N/A	#N/A	#N/A	#N/A	#N/A	#N/A	#N/A	#N/A
100458	1	-8.60347	-20.8003	2.31387	1.4176	6.8746	-20.5693	1.56961	-7.75832	#N/A	#N/A	#N/A	#N/A	#N/A	#N/A	#N/A	#N/A	#N/A	#N/A	#N/A	#N/A
100717	1	0.592306	-7.41599	0.177787	0.253595	-0.274318	0.827539	0.643571	-7.76901	#N/A	#N/A	#N/A	#N/A	#N/A	#N/A	#N/A	#N/A	#N/A	#N/A	#N/A	#N/A
101225	1	0.53955	0.214286	-8.89219	0.320678	-0.919111	0.475066	0.593598	-8.85125	#N/A	#N/A	#N/A	#N/A	#N/A	#N/A	#N/A	#N/A	#N/A	#N/A	#N/A	#N/A
106179	1	0.0118883	-8.99722	0.639806	0.428142	-0.854421	0.439549	0.602495	-9.93875	#N/A	#N/A	#N/A	#N/A	#N/A	#N/A	#N/A	#N/A	#N/A	#N/A	#N/A	#N/A
107422	1	0.444709	-8.14252	0.312861	0.0472702	0.560984	0.708682	1.2931	-8.74928	#N/A	#N/A	#N/A	#N/A	#N/A	#N/A	#N/A	#N/A	#N/A	#N/A	#N/A	#N/A
108097	1	1.50149	-21.051	-8.14989	0.395563	6.83301	-20.2293	8.62603	-7.51505	#N/A	#N/A	#N/A	#N/A	#N/A	#N/A	#N/A	#N/A	#N/A	#N/A	#N/A	#N/A
109316	1	0.257524	0.316525	-9.34597	0.615746	-0.622279	0.710072	0.560884	-9.35776	#N/A	#N/A	#N/A	#N/A	#N/A	#N/A	#N/A	#N/A	#N/A	#N/A	#N/A	#N/A
109645	1	-0.795764	-20.2801	-7.37817	2.3183	6.17685	-5.72524	7.97073	-7.50131	#N/A	#N/A	#N/A	#N/A	#N/A	#N/A	#N/A	#N/A	#N/A	#N/A	#N/A	#N/A
110144	1	1.21381	-8.34537	-0.256804	-0.175947	-0.901639	0.939858	0.17537	-8.52109	#N/A	#N/A	#N/A	#N/A	#N/A	#N/A	#N/A	#N/A	#N/A	#N/A	#N/A	#N/A
113032	1	-1.93736	-9.27764	0.73311	1.56738	2.62957	1.73562	1.33306	-10.6861	#N/A	#N/A	#N/A	#N/A	#N/A	#N/A	#N/A	#N/A	#N/A	#N/A	#N/A	#N/A
113247	1	0.366153	-22.6112	-9.66661	1.47091	0.204976	-9.09749	1.45715	0.372596	#N/A	#N/A	#N/A	#N/A	#N/A	#N/A	#N/A	#N/A	#N/A	#N/A	#N/A	#N/A
114177	1	0.676274	-0.324217	-8.47353	0.708019	-0.536851	1.19394	-0.155614	-8.15172	#N/A	#N/A	#N/A	#N/A	#N/A	#N/A	#N/A	#N/A	#N/A	#N/A	#N/A	#N/A
116228	1	0.131673	-9.31533	-0.905895	1.07499	1.81239	-0.203945	2.64628	-10.2257	#N/A	#N/A	#N/A	#N/A	#N/A	#N/A	#N/A	#N/A	#N/A	#N/A	#N/A	#N/A
117602	1	-8.25211	-20.3765	2.3138	3.29975	0	0	-6.74237	-21.0203	#N/A	#N/A	#N/A	#N/A	#N/A	#N/A	#N/A	#N/A	#N/A	#N/A	#N/A	#N/A
117652	1	-1.44264	-22.0582	-7.49933	2.85898	6.16655	-5.71405	7.9593	-7.76347	#N/A	#N/A	#N/A	#N/A	#N/A	#N/A	#N/A	#N/A	#N/A	#N/A	#N/A	#N/A
120671	1	-9.51643	0.240895	1.43003	2.4126	-1.51288	0.211383	-0.38765	-9.18491	#N/A	#N/A	#N/A	#N/A	#N/A	#N/A	#N/A	#N/A	#N/A	#N/A	#N/A	#N/A
121276	1	1.21381	-8.34537	-0.256804	-0.175947	-0.901639	0.939858	0.17537	-8.52109	#N/A	#N/A	#N/A	#N/A	#N/A	#N/A	#N/A	#N/A	#N/A	#N/A	#N/A	#N/A
122027	1	0.556474	-8.05947	-0.178145	0.54755	1.16145	1.8713	0.805834	-8.58354	#N/A	#N/A	#N/A	#N/A	#N/A	#N/A	#N/A	#N/A	#N/A	#N/A	#N/A	#N/A
123824	1	0.0118883	-8.99722	0.639806	0.428142	-0.854421	0.439549	0.602495	-9.93875	#N/A	#N/A	#N/A	#N/A	#N/A	#N/A	#N/A	#N/A	#N/A	#N/A	#N/A	#N/A
123850	1	0.0118883	-8.99722	0.639806	0.428142	-0.854421	0.439549	0.602495	-9.93875	#N/A	#N/A	#N/A	#N/A	#N/A	#N/A	#N/A	#N/A	#N/A	#N/A	#N/A	#N/A
124586	1	1.156	-7.81717	-8.59102	0.83973	0.387334	1.09516	1.70323	-8.59442	#N/A	#N/A	#N/A	#N/A	#N/A	#N/A	#N/A	#N/A	#N/A	#N/A	#N/A	#N/A
124929	1	0.614404	0.722184	-0.070062	-8.62186	6.52673	-7.13978	2.27127	-20.6094	#N/A	#N/A	#N/A	#N/A	#N/A	#N/A	#N/A	#N/A	#N/A	#N/A	#N/A	#N/A
128410	1	0.556474	-8.05947	-0.178145	0.54755	1.16145	1.8713	0.805834	-8.58354	#N/A	#N/A	#N/A	#N/A	#N/A	#N/A	#N/A	#N/A	#N/A	#N/A	#N/A	#N/A
129265	1	-0.793395	-20.1118	-7.59564	1.95353	6.87752	-20.3805	8.67015	-7.81194	#N/A	#N/A	#N/A	#N/A	#N/A	#N/A	#N/A	#N/A	#N/A	#N/A	#N/A	#N/A
129425	1	0.889845	-0.153432	-9.59943	0.216811	-0.960884	-0.522859	1.49171	-9.23498	#N/A	#N/A	#N/A	#N/A	#N/A	#N/A	#N/A	#N/A	#N/A	#N/A	#N/A	#N/A
131752	1	-0.0175568	-9.75297	1.4935	-0.554598	-0.249072	2.031	-0.575685	-10.3868	#N/A	#N/A	#N/A	#N/A	#N/A	#N/A	#N/A	#N/A	#N/A	#N/A	#N/A	#N/A
131814	1	-2.60959	-21.0499	-7.82553	3.38324	6.65869	-20.6567	8.44735	-8.302	#N/A	#N/A	#N/A	#N/A	#N/A	#N/A	#N/A	#N/A	#N/A	#N/A	#N/A	#N/A
134994	1	-1.06426	-20.8921	-7.76817	2.98944	5.54536	-5.09734	7.33046	-7.84962	#N/A	#N/A	#N/A	#N/A	#N/A	#N/A	#N/A	#N/A	#N/A	#N/A	#N/A	#N/A
135468	1	0.295102	1.29168	-0.808855	-9.91709	1.69831	-9.32348	3.71392	-23.7801	#N/A	#N/A	#N/A	#N/A	#N/A	#N/A	#N/A	#N/A	#N/A	#N/A	#N/A	#N/A
135675	1	1.20184	-0.919257	-9.4664	0.138007	-0.590269	0.10457	1.54915	-9.33233	#N/A	#N/A	#N/A	#N/A	#N/A	#N/A	#N/A	#N/A	#N/A	#N/A	#N/A	#N/A
136053	1	1.33667	-0.550138	-8.18123	-0.261388	-0.396774	1.50327	-0.0384535	-8.08529	#N/A	#N/A	#N/A	#N/A	#N/A	#N/A	#N/A	#N/A	#N/A	#N/A	#N/A	#N/A
137868	1	-0.829712	-20.5648	-7.41097	2.7683	5.2596	-4.81097	7.0482	-7.42325	#N/A	#N/A	#N/A	#N/A	#N/A	#N/A	#N/A	#N/A	#N/A	#N/A	#N/A	#N/A
140102	1	1.33667	-0.550138	-8.18123	-0.261388	-0.396774	1.50327	-0.0384535	-8.08529	#N/A	#N/A	#N/A	#N/A	#N/A	#N/A	#N/A	#N/A	#N/A	#N/A	#N/A	#N/A
140909	1	-8.29748	-20.368	2.96412	2.64918	0	0	-21.3687	-20.8071	#N/A	#N/A	#N/A	#N/A	#N/A	#N/A	#N/A	#N/A	#N/A	#N/A	#N/A	#N/A
141376	1	-0.219475	-9.32337	0.205702	1.06264	-0.906632	0.858495	0.419647	-10.5485	#N/A	#N/A	#N/A	#N/A	#N/A	#N/A	#N/A	#N/A	#N/A	#N/A	#N/A	#N/A
143152	1	-20.567	-6.25542	-21.8279	2.42418	8.60919	0.156673	1.43996	0.692393	#N/A	#N/A	#N/A	#N/A	#N/A	#N/A	#N/A	#N/A	#N/A	#N/A	#N/A	#N/A
143192	1	-0.0325883	-8.59679	0.512943	0.6677	0.18137	0.273597	1.16069	-9.20838	#N/A	#N/A	#N/A	#N/A	#N/A	#N/A	#N/A	#N/A	#N/A	#N/A	#N/A	#N/A
143783	1	-1.32237	-8.2913	-0.00931797	2.04642	-0.131671	0.942009	1.02138	-9.69375	#N/A	#N/A	#N/A	#N/A	#N/A	#N/A	#N/A	#N/A	#N/A	#N/A	#N/A	#N/A
144178	1	0.539693	0.214485	-8.89247	0.32054	-0.919375	0.475105	0.593988	-8.8511	#N/A	#N/A	#N/A	#N/A	#N/A	#N/A	#N/A	#N/A	#N/A	#N/A	#N/A	#N/A
148943	1	0.257524	0.316525	-9.34597	0.615746	-0.622279	0.710072	0.560884	-9.35776	#N/A	#N/A	#N/A	#N/A	#N/A	#N/A	#N/A	#N/A	#N/A	#N/A	#N/A	#N/A
152419	1	0.444709	-8.14252	0.312861	0.0472702	0.560984	0.708682	1.2931	-8.74928	#N/A	#N/A	#N/A	#N/A	#N/A	#N/A	#N/A	#N/A	#N/A	#N/A	#N/A	#N/A
153248	1	8.31194	-7.01205	-7.72169	-7.78066	-7.06907	-4.66158	-5.4349	-5.07298	#N/A	#N/A	#N/A	#N/A	#N/A	#N/A	#N/A	#N/A	#N/A	#N/A	#N/A	#N/A
155069	1	-1.50697	-24.0849	1.09948	1.43377	-0.503323	-10.3811	0.445869	0.411454	#N/A	#N/A	#N/A	#N/A	#N/A	#N/A	#N/A	#N/A	#N/A	#N/A	#N/A	#N/A
155601	1	-7.15023	2.40371	1.37439	-7.00541	6.73891	-6.75774	2.95062	-20.7381	#N/A	#N/A	#N/A	#N/A	#N/A	#N/A	#N/A	#N/A	#N/A	#N/A	#N/A	#N/A
158670	1	0.877619	-9.1886	0.0443865	-0.00205388	-0.59634	0.682817	0.573091	-9.47043	#N/A	#N/A	#N/A	#N/A	#N/A	#N/A	#N/A	#N/A	#N/A	#N/A	#N/A	#N/A
159683	1	1.34127	-9.67502	-10.2274	0.889384	9.11994	3.24786	0.747369	-9.88137	#N/A	#N/A	#N/A	#N/A	#N/A	#N/A	#N/A	#N/A	#N/A	#N/A	#N/A	#N/A
161626	1	-1.32237	-8.2913	-0.00931797	2.04642	-0.131671	0.942009	1.02138	-9.69375	#N/A	#N/A	#N/A	#N/A	#N/A	#N/A	#N/A	#N/A	#N/A	#N/A	#N/A	#N/A
163321	1	-0.262703	-8.69549	0.182941	1.37117	-0.688767	-7.60042	1.33576	-9.22151	#N/A	#N/A	#N/A	#N/A	#N/A	#N/A	#N/A	#N/A	#N/A	#N/A	#N/A	#N/A
163445	1	-9.42472	-21.6502	2.18839	3.42532	0	0	-22.0161	-22.1219	#N/A	#N/A	#N/A	#N/A	#N/A	#N/A	#N/A	#N/A	#N/A	#N/A	#N/A	#N/A
163783	1	-9.61924	2.60667	1.3281	1.37886	0	-21.4673	-21.6593	-21.1397	#N/A	#N/A	#N/A	#N/A	#N/A	#N/A	#N/A	#N/A	#N/A	#N/A	#N/A	#N/A
165401	1	0.828559	-8.5426	0.122129	-0.0483226	-0.932015	0.595909	0.422624	-9.01163	#N/A	#N/A	#N/A	#N/A	#N/A	#N/A	#N/A	#N/A	#N/A	#N/A	#N/A	#N/A
166167	1	0.0377365	-8.45276	0.622365	0.552136	-1.01148	0.823856	0.171383	-9.36266	#N/A	#N/A	#N/A	#N/A	#N/A	#N/A	#N/A	#N/A	#N/A	#N/A	#N/A	#N/A
173260	1	-8.3451	1.57469	-21.2833	4.04868	0	-5.57936	0	-21.3362	#N/A	#N/A	#N/A	#N/A	#N/A	#N/A	#N/A	#N/A	#N/A	#N/A	#N/A	#N/A
173289	1	-8.60347	-20.8003	2.31387	1.4176	6.8746	-20.5693	1.56961	-7.75832	#N/A	#N/A	#N/A	#N/A	#N/A	#N/A	#N/A	#N/A	#N/A	#N/A	#N/A	#N/A
173851	1	0.178633	0.639631	-8.69467	0.556244	-1.53513	-0.965908	1.10109	-8.60263	#N/A	#N/A	#N/A	#N/A	#N/A	#N/A	#N/A	#N/A	#N/A	#N/A	#N/A	#N/A
177143	1	1.20184	-0.919257	-9.4664	0.138007	-0.590269	0.10457	1.54915	-9.33233	#N/A	#N/A	#N/A	#N/A	#N/A	#N/A	#N/A	#N/A	#N/A	#N/A	#N/A	#N/A
178757	1	0.772446	0.485707	-8.79562	-0.369406	-0.38767	0.270245	1.19702	-8.40024	#N/A	#N/A	#N/A	#N/A	#N/A	#N/A	#N/A	#N/A	#N/A	#N/A	#N/A	#N/A
184039	1	-20.567	-6.25542	-21.8279	2.42418	8.60919	0.156673	1.43996	0.692393	#N/A	#N/A	#N/A	#N/A	#N/A	#N/A	#N/A	#N/A	#N/A	#N/A	#N/A	#N/A
185277	1	0.199689	-7.886	1.52319	-0.854682	-0.92855	1.11749	-0.76995	-7.72901	#N/A	#N/A	#N/A	#N/A	#N/A	#N/A	#N/A	#N/A	#N/A	#N/A	#N/A	#N/A
185991	1	-0.952622	-8.53998	0.675242	1.76916	0.621016	1.4475	0.508103	-9.30429	#N/A	#N/A	#N/A	#N/A	#N/A	#N/A	#N/A	#N/A	#N/A	#N/A	#N/A	#N/A
188431	1	-0.110606	-20.7342	-7.68023	1.97828	6.041	-5.58985	7.83301	-7.51023	#N/A	#N/A	#N/A	#N/A	#N/A	#N/A	#N/A	#N/A	#N/A	#N/A	#N/A	#N/A
188638	1	1.4088	-7.74245	-8.48472	0.735183	-0.956719	0.601851	0.995892	-8.33028	#N/A	#N/A	#N/A	#N/A	#N/A	#N/A	#N/A	#N/A	#N/A	#N/A	#N/A	#N/A
188946	1	0.821721	-0.215251	-9.18624	0.293748	-0.564774	0.50899	1.0149	-8.98601	#N/A	#N/A	#N/A	#N/A	#N/A	#N/A	#N/A	#N/A	#N/A	#N/A	#N/A	#N/A
189744	1	0.877619	-9.1886	0.0443865	-0.00205388	-0.59634	0.682817	0.573091	-9.47043	#N/A	#N/A	#N/A	#N/A	#N/A	#N/A	#N/A	#N/A	#N/A	#N/A	#N/A	#N/A
194470	1	0.403184	-8.68245	0.32408	0.414522	-0.658376	0.390315	0.633839	-9.12791	#N/A	#N/A	#N/A	#N/A	#N/A	#N/A	#N/A	#N/A	#N/A	#N/A	#N/A	#N/A
196961	1	-8.60347	-20.8003	2.31387	1.4176	6.8746	-20.5693	1.56961	-7.75832	#N/A	#N/A	#N/A	#N/A	#N/A	#N/A	#N/A	#N/A	#N/A	#N/A	#N/A	#N/A
197894	1	0.877619	-9.1886	0.0443865	-0.00205388	-0.59634	0.682817	0.573091	-9.47043	#N/A	#N/A	#N/A	#N/A	#N/A	#N/A	#N/A	#N/A	#N/A	#N/A	#N/A	#N/A
197895	1	0.877619	-9.1886	0.0443865	-0.00205388	-0.59634	0.682817	0.573091	-9.47043	#N/A	#N/A	#N/A	#N/A	#N/A	#N/A	#N/A	#N/A	#N/A	#N/A	#N/A	#N/A
198224	1	0.000207518	-8.36838	1.36146	0.408799	-0.306304	3.29732	-8.93336	-8.23005	#N/A	#N/A	#N/A	#N/A	#N/A	#N/A	#N/A	#N/A	#N/A	#N/A	#N/A	#N/A
199617	1	0.0377365	-8.45276	0.622365	0.552136	-1.01148	0.823856	0.171383	-9.36266	#N/A	#N/A	#N/A	#N/A	#N/A	#N/A	#N/A	#N/A	#N/A	#N/A	#N/A	#N/A
202012	1	-9.51643	0.240895	1.43003	2.4126	-1.51288	0.211383	-0.38765	-9.18491	#N/A	#N/A	#N/A	#N/A	#N/A	#N/A	#N/A	#N/A	#N/A	#N/A	#N/A	#N/A
205738	1	1.50034	-20.9327	-7.92806	0.662364	5.56982	-5.12117	7.36262	-6.88447	#N/A	#N/A	#N/A	#N/A	#N/A	#N/A	#N/A	#N/A	#N/A	#N/A	#N/A	#N/A
206268	1	-0.0638414	-8.49955	0.581786	0.65258	0.0280553	0.881584	0.81701	-9.21219	#N/A	#N/A	#N/A	#N/A	#N/A	#N/A	#N/A	#N/A	#N/A	#N/A	#N/A	#N/A
208016	1	-9.61829	2.60706	1.32863	1.37892	0	-21.2719	-21.6419	-21.2176	#N/A	#N/A	#N/A	#N/A	#N/A	#N/A	#N/A	#N/A	#N/A	#N/A	#N/A	#N/A
209619	1	0.402467	0.853606	-11.3096	-0.131832	-1.48389	-0.264518	0.541222	-11.1584	#N/A	#N/A	#N/A	#N/A	#N/A	#N/A	#N/A	#N/A	#N/A	#N/A	#N/A	#N/A
209699	1	0.676274	-0.324217	-8.47353	0.708019	-0.536851	1.19394	-0.155614	-8.15172	#N/A	#N/A	#N/A	#N/A	#N/A	#N/A	#N/A	#N/A	#N/A	#N/A	#N/A	#N/A
210515	1	-8.25211	-20.3765	2.3138	3.29975	0	0	-6.74237	-21.0203	#N/A	#N/A	#N/A	#N/A	#N/A	#N/A	#N/A	#N/A	#N/A	#N/A	#N/A	#N/A
210821	1	0.0911578	-9.03093	0.670956	1.04392	-1.98128	1.60855	-9.87636	-9.60854	#N/A	#N/A	#N/A	#N/A	#N/A	#N/A	#N/A	#N/A	#N/A	#N/A	#N/A	#N/A
211778	1	-0.829712	-20.5648	-7.41097	2.7683	5.2596	-4.81097	7.0482	-7.42325	#N/A	#N/A	#N/A	#N/A	#N/A	#N/A	#N/A	#N/A	#N/A	#N/A	#N/A	#N/A
212069	1	0.813204	-10.1064	-0.222298	0.439802	-0.760495	0.553172	0.467986	-10.2451	#N/A	#N/A	#N/A	#N/A	#N/A	#N/A	#N/A	#N/A	#N/A	#N/A	#N/A	#N/A
214206	1	3.90368	-22.7109	-9.62842	-1.60671	6.26168	-5.81052	8.04916	-7.03881	#N/A	#N/A	#N/A	#N/A	#N/A	#N/A	#N/A	#N/A	#N/A	#N/A	#N/A	#N/A
216762	1	0.53955	0.214286	-8.89219	0.320678	-0.919111	0.475066	0.593598	-8.85125	#N/A	#N/A	#N/A	#N/A	#N/A	#N/A	#N/A	#N/A	#N/A	#N/A	#N/A	#N/A
217041	1	-0.0668061	0.388655	-9.18485	1.09578	0.76147	0.652463	1.34951	-8.88213	#N/A	#N/A	#N/A	#N/A	#N/A	#N/A	#N/A	#N/A	#N/A	#N/A	#N/A	#N/A
217410	1	0.236579	0.753858	0.118647	-10.1847	1.69875	-9.32052	2.9017	-23.1174	#N/A	#N/A	#N/A	#N/A	#N/A	#N/A	#N/A	#N/A	#N/A	#N/A	#N/A	#N/A
221338	1	-0.732016	1.26353	0.965673	-12.395	-1.4315	-1.17255	0.593341	-12.1142	#N/A	#N/A	#N/A	#N/A	#N/A	#N/A	#N/A	#N/A	#N/A	#N/A	#N/A	#N/A
221392	1	-20.567	-6.25542	-21.8279	2.42418	8.60919	0.156673	1.43996	0.692393	#N/A	#N/A	#N/A	#N/A	#N/A	#N/A	#N/A	#N/A	#N/A	#N/A	#N/A	#N/A
222736	1	-22.4676	-5.16646	-5.87617	10.0452	-8.28254	-5.88417	-6.65855	-8.35017	#N/A	#N/A	#N/A	#N/A	#N/A	#N/A	#N/A	#N/A	#N/A	#N/A	#N/A	#N/A
223811	1	-7.44331	-6.28114	-21.3452	3.83332	-0.434702	1.06479	1.08204	-8.54731	#N/A	#N/A	#N/A	#N/A	#N/A	#N/A	#N/A	#N/A	#N/A	#N/A	#N/A	#N/A
224307	1	-1.53632	-23.3794	1.14597	1.36847	-0.350213	-9.54687	0.605474	0.313344	#N/A	#N/A	#N/A	#N/A	#N/A	#N/A	#N/A	#N/A	#N/A	#N/A	#N/A	#N/A
224308	1	-1.53632	-23.3794	1.14597	1.36847	-0.350213	-9.54687	0.605474	0.313344	#N/A	#N/A	#N/A	#N/A	#N/A	#N/A	#N/A	#N/A	#N/A	#N/A	#N/A	#N/A
224792	1	0.364786	-8.445	-0.16705	0.674484	1.13586	1.14969	1.35729	-9.06685	#N/A	#N/A	#N/A	#N/A	#N/A	#N/A	#N/A	#N/A	#N/A	#N/A	#N/A	#N/A
225971	1	-1.50697	-24.0849	1.09948	1.43377	-0.503323	-10.3811	0.445869	0.411454	#N/A	#N/A	#N/A	#N/A	#N/A	#N/A	#N/A	#N/A	#N/A	#N/A	#N/A	#N/A
227966	1	-8.60347	-20.8003	2.31387	1.4176	6.8746	-20.5693	1.56961	-7.75832	#N/A	#N/A	#N/A	#N/A	#N/A	#N/A	#N/A	#N/A	#N/A	#N/A	#N/A	#N/A
234959	1	0.821721	-0.215251	-9.18624	0.293748	-0.564774	0.50899	1.0149	-8.98601	#N/A	#N/A	#N/A	#N/A	#N/A	#N/A	#N/A	#N/A	#N/A	#N/A	#N/A	#N/A
236547	1	0.360516	0.216792	-9.52219	0.525843	-0.248781	0.125035	1.60215	-9.40869	#N/A	#N/A	#N/A	#N/A	#N/A	#N/A	#N/A	#N/A	#N/A	#N/A	#N/A	#N/A
236583	1	-8.3451	1.57461	-21.3199	4.04953	0	-5.57914	0	-21.3305	#N/A	#N/A	#N/A	#N/A	#N/A	#N/A	#N/A	#N/A	#N/A	#N/A	#N/A	#N/A
238590	1	0.0946328	-8.50314	0.857445	0.259033	-0.441315	0.503682	0.527201	-8.94525	#N/A	#N/A	#N/A	#N/A	#N/A	#N/A	#N/A	#N/A	#N/A	#N/A	#N/A	#N/A
238689	1	-7.15023	2.40371	1.37439	-7.00541	6.73891	-6.75774	2.95062	-20.7381	#N/A	#N/A	#N/A	#N/A	#N/A	#N/A	#N/A	#N/A	#N/A	#N/A	#N/A	#N/A
239586	1	-8.34695	-6.88232	3.07475	3.08221	6.60214	8.41536	-7.94171	-7.72778	#N/A	#N/A	#N/A	#N/A	#N/A	#N/A	#N/A	#N/A	#N/A	#N/A	#N/A	#N/A
240082	1	-21.7469	-20.0905	-21.4778	3.48898	6.67299	-20.3899	8.46722	-8.01454	#N/A	#N/A	#N/A	#N/A	#N/A	#N/A	#N/A	#N/A	#N/A	#N/A	#N/A	#N/A
240815	1	-0.600125	-8.41457	0.123457	1.81371	-1.65026	-7.50168	0.854038	-9.1798	#N/A	#N/A	#N/A	#N/A	#N/A	#N/A	#N/A	#N/A	#N/A	#N/A	#N/A	#N/A
241960	1	1.1009	-8.0708	-0.079728	-0.410463	-0.274541	1.32345	0.508563	-8.61726	#N/A	#N/A	#N/A	#N/A	#N/A	#N/A	#N/A	#N/A	#N/A	#N/A	#N/A	#N/A
244013	1	-9.42472	-21.6502	2.18839	3.42532	0	0	-22.0161	-22.1219	#N/A	#N/A	#N/A	#N/A	#N/A	#N/A	#N/A	#N/A	#N/A	#N/A	#N/A	#N/A
244550	1	-0.795764	-20.2801	-7.37817	2.3183	6.17685	-5.72524	7.97073	-7.50131	#N/A	#N/A	#N/A	#N/A	#N/A	#N/A	#N/A	#N/A	#N/A	#N/A	#N/A	#N/A
246439	1	0.300283	-8.92657	-0.737834	1.42873	0.599831	2.42298	-0.160499	-9.23154	#N/A	#N/A	#N/A	#N/A	#N/A	#N/A	#N/A	#N/A	#N/A	#N/A	#N/A	#N/A
247604	1	0.882656	-0.0458652	-8.68919	0.0756605	0.754521	0.765852	1.54778	-8.18706	#N/A	#N/A	#N/A	#N/A	#N/A	#N/A	#N/A	#N/A	#N/A	#N/A	#N/A	#N/A
135750	2	8.95026	-21.7958	-22.5616	-22.7307	6.13914	7.95677	-6.45982	-6.09863	#N/A	#N/A	#N/A	#N/A	#N/A	#N/A	#N/A	#N/A	#N/A	#N/A	#N/A	#N/A
236409	2	8.95025	-21.8059	-22.5764	-22.7386	6.138	7.95654	-6.45985	-6.09871	#N/A	#N/A	#N/A	#N/A	#N/A	#N/A	#N/A	#N/A	#N/A	#N/A	#N/A	#N/A
164458	2	8.94276	-7.96488	-23.2944	-23.4611	9.25361	0.188291	1.72206	0.95215	#N/A	#N/A	#N/A	#N/A	#N/A	#N/A	#N/A	#N/A	#N/A	#N/A	#N/A	#N/A
202369	2	8.94276	-7.96488	-23.2944	-23.4611	9.25361	0.188291	1.72206	0.95215	#N/A	#N/A	#N/A	#N/A	#N/A	#N/A	#N/A	#N/A	#N/A	#N/A	#N/A	#N/A
242	2	8.90896	-7.96746	-8.31867	-8.37763	21.3019	9.01758	-22.0168	-21.335	#N/A	#N/A	#N/A	#N/A	#N/A	#N/A	#N/A	#N/A	#N/A	#N/A	#N/A	#N/A
54704	2	8.90896	-7.96746	-8.31867	-8.37763	21.3019	9.01758	-22.0168	-21.335	#N/A	#N/A	#N/A	#N/A	#N/A	#N/A	#N/A	#N/A	#N/A	#N/A	#N/A	#N/A
138439	2	8.69033	-7.38982	-8.09968	-8.1584	-9.37574	-20.9006	-22.0685	-21.7246	#N/A	#N/A	#N/A	#N/A	#N/A	#N/A	#N/A	#N/A	#N/A	#N/A	#N/A	#N/A
213886	2	8.69033	-7.38982	-8.09968	-8.1584	-9.37574	-20.9006	-22.0685	-21.7246	#N/A	#N/A	#N/A	#N/A	#N/A	#N/A	#N/A	#N/A	#N/A	#N/A	#N/A	#N/A
181730	2	8.45374	-21.0878	-22.2518	-22.3818	6.96839	-20.3847	-21.5611	8.86781	#N/A	#N/A	#N/A	#N/A	#N/A	#N/A	#N/A	#N/A	#N/A	#N/A	#N/A	#N/A
71525	2	8.45349	-7.15364	-7.86329	-7.92226	21.0888	-20.5805	-21.7121	9.10016	#N/A	#N/A	#N/A	#N/A	#N/A	#N/A	#N/A	#N/A	#N/A	#N/A	#N/A	#N/A
84801	2	8.45349	-7.15364	-7.86329	-7.92226	21.0888	-20.5805	-21.7121	9.10016	#N/A	#N/A	#N/A	#N/A	#N/A	#N/A	#N/A	#N/A	#N/A	#N/A	#N/A	#N/A
71947	2	8.31285	-7.01143	-7.72114	-7.78012	-10.1281	-21.6161	-22.9724	-22.3601	#N/A	#N/A	#N/A	#N/A	#N/A	#N/A	#N/A	#N/A	#N/A	#N/A	#N/A	#N/A
247332	2	8.31285	-7.01143	-7.72114	-7.78012	-10.1281	-21.6161	-22.9724	-22.3601	#N/A	#N/A	#N/A	#N/A	#N/A	#N/A	#N/A	#N/A	#N/A	#N/A	#N/A	#N/A
64338	2	8.18443	-21.1914	-22.1981	-22.2838	-8.42725	-6.03	-6.80426	-6.44417	#N/A	#N/A	#N/A	#N/A	#N/A	#N/A	#N/A	#N/A	#N/A	#N/A	#N/A	#N/A
175828	2	8.18443	-21.1914	-22.1981	-22.2838	-8.42725	-6.03	-6.80426	-6.44417	#N/A	#N/A	#N/A	#N/A	#N/A	#N/A	#N/A	#N/A	#N/A	#N/A	#N/A	#N/A
107228	2	8.17859	-7.22559	-21.6691	-21.98	6.42493	8.24724	-6.74637	-6.3856	#N/A	#N/A	#N/A	#N/A	#N/A	#N/A	#N/A	#N/A	#N/A	#N/A	#N/A	#N/A
116894	2	8.17859	-7.22559	-21.6691	-21.98	6.42493	8.24724	-6.74637	-6.3856	#N/A	#N/A	#N/A	#N/A	#N/A	#N/A	#N/A	#N/A	#N/A	#N/A	#N/A	#N/A
105386	2	8.17544	-7.28722	-21.8498	-21.9873	6.70358	8.52322	-7.02481	-6.66419	#N/A	#N/A	#N/A	#N/A	#N/A	#N/A	#N/A	#N/A	#N/A	#N/A	#N/A	#N/A
105398	2	8.17544	-7.28722	-21.8498	-21.9873	6.70358	8.52322	-7.02481	-6.66419	#N/A	#N/A	#N/A	#N/A	#N/A	#N/A	#N/A	#N/A	#N/A	#N/A	#N/A	#N/A
113854	2	8.17544	-7.28722	-21.8498	-21.9873	6.70358	8.52322	-7.02481	-6.66419	#N/A	#N/A	#N/A	#N/A	#N/A	#N/A	#N/A	#N/A	#N/A	#N/A	#N/A	#N/A
123292	2	8.17544	-7.28722	-21.8498	-21.9873	6.70358	8.52322	-7.02481	-6.66419	#N/A	#N/A	#N/A	#N/A	#N/A	#N/A	#N/A	#N/A	#N/A	#N/A	#N/A	#N/A
129532	2	7.98575	-7.70498	-21.6252	-21.7437	21.7757	9.96152	-22.6278	-22.1008	#N/A	#N/A	#N/A	#N/A	#N/A	#N/A	#N/A	#N/A	#N/A	#N/A	#N/A	#N/A
147643	2	7.98575	-7.70498	-21.6252	-21.7437	21.7757	9.96152	-22.6278	-22.1008	#N/A	#N/A	#N/A	#N/A	#N/A	#N/A	#N/A	#N/A	#N/A	#N/A	#N/A	#N/A
204900	2	7.93255	-20.7312	-21.528	-21.5178	6.7901	-20.4629	-21.3316	8.68949	#N/A	#N/A	#N/A	#N/A	#N/A	#N/A	#N/A	#N/A	#N/A	#N/A	#N/A	#N/A
118786	2	7.69654	-20.1869	-21.4861	-21.6044	-8.31015	-5.90926	-6.68321	-6.32218	#N/A	#N/A	#N/A	#N/A	#N/A	#N/A	#N/A	#N/A	#N/A	#N/A	#N/A	#N/A
206419	2	7.69614	-20.3519	-21.4111	-21.3295	-8.30969	-5.90962	-6.68365	-6.32283	#N/A	#N/A	#N/A	#N/A	#N/A	#N/A	#N/A	#N/A	#N/A	#N/A	#N/A	#N/A
119004	2	7.60078	-20.4621	-21.224	-21.1832	21.4669	-20.8918	-21.8701	9.20906	#N/A	#N/A	#N/A	#N/A	#N/A	#N/A	#N/A	#N/A	#N/A	#N/A	#N/A	#N/A
173515	2	7.60078	-20.4621	-21.224	-21.1832	21.4669	-20.8918	-21.8701	9.20906	#N/A	#N/A	#N/A	#N/A	#N/A	#N/A	#N/A	#N/A	#N/A	#N/A	#N/A	#N/A
216320	2	7.60078	-20.4621	-21.224	-21.1832	21.4669	-20.8918	-21.8701	9.20906	#N/A	#N/A	#N/A	#N/A	#N/A	#N/A	#N/A	#N/A	#N/A	#N/A	#N/A	#N/A
116326	2	7.53527	-20.3206	-21.1617	-21.2658	4.87912	-4.43139	-5.20464	6.77649	#N/A	#N/A	#N/A	#N/A	#N/A	#N/A	#N/A	#N/A	#N/A	#N/A	#N/A	#N/A
128006	2	7.53527	-20.3206	-21.1617	-21.2658	4.87912	-4.43139	-5.20464	6.77649	#N/A	#N/A	#N/A	#N/A	#N/A	#N/A	#N/A	#N/A	#N/A	#N/A	#N/A	#N/A
75224	2	7.52975	-20.3205	-21.1531	-21.2932	6.58672	-20.244	-21.1165	8.48656	#N/A	#N/A	#N/A	#N/A	#N/A	#N/A	#N/A	#N/A	#N/A	#N/A	#N/A	#N/A
208792	2	7.52975	-20.3205	-21.1531	-21.2932	6.58672	-20.244	-21.1165	8.48656	#N/A	#N/A	#N/A	#N/A	#N/A	#N/A	#N/A	#N/A	#N/A	#N/A	#N/A	#N/A
55860	2	7.36526	-20.2027	-20.9004	-21.0585	-7.92463	-5.52355	-6.29781	-5.93733	#N/A	#N/A	#N/A	#N/A	#N/A	#N/A	#N/A	#N/A	#N/A	#N/A	#N/A	#N/A
240209	2	7.36526	-20.2027	-20.9004	-21.0585	-7.92463	-5.52355	-6.29781	-5.93733	#N/A	#N/A	#N/A	#N/A	#N/A	#N/A	#N/A	#N/A	#N/A	#N/A	#N/A	#N/A
71141	2	0.35501	-20.7062	2.0344	-21.8305	0	0	-21.2597	0	#N/A	#N/A	#N/A	#N/A	#N/A	#N/A	#N/A	#N/A	#N/A	#N/A	#N/A	#N/A
141166	2	0.35501	-20.7062	2.0344	-21.8305	0	0	-21.2597	0	#N/A	#N/A	#N/A	#N/A	#N/A	#N/A	#N/A	#N/A	#N/A	#N/A	#N/A	#N/A
108550	2	0.141858	-8.83465	-22.7352	2.24687	-1.20698	0.84359	-11.0478	0.164531	#N/A	#N/A	#N/A	#N/A	#N/A	#N/A	#N/A	#N/A	#N/A	#N/A	#N/A	#N/A
58800	2	-0.0717097	-20.9382	-21.8476	2.46178	-9.45704	-20.9658	-22.0475	-8.32923	#N/A	#N/A	#N/A	#N/A	#N/A	#N/A	#N/A	#N/A	#N/A	#N/A	#N/A	#N/A
95892	2	-0.0717097	-20.9382	-21.8476	2.46178	-9.45704	-20.9658	-22.0475	-8.32923	#N/A	#N/A	#N/A	#N/A	#N/A	#N/A	#N/A	#N/A	#N/A	#N/A	#N/A	#N/A
120563	2	-0.0717097	-20.9382	-21.8476	2.46178	-9.45704	-20.9658	-22.0475	-8.32923	#N/A	#N/A	#N/A	#N/A	#N/A	#N/A	#N/A	#N/A	#N/A	#N/A	#N/A	#N/A
213259	2	-0.0717097	-20.9382	-21.8476	2.46178	-9.45704	-20.9658	-22.0475	-8.32923	#N/A	#N/A	#N/A	#N/A	#N/A	#N/A	#N/A	#N/A	#N/A	#N/A	#N/A	#N/A
39543	2	-0.0754648	-8.4122	-22.7184	2.46687	21.5845	9.47027	-22.219	-8.97444	#N/A	#N/A	#N/A	#N/A	#N/A	#N/A	#N/A	#N/A	#N/A	#N/A	#N/A	#N/A
100396	2	-0.0754648	-8.4122	-22.7184	2.46687	21.5845	9.47027	-22.219	-8.97444	#N/A	#N/A	#N/A	#N/A	#N/A	#N/A	#N/A	#N/A	#N/A	#N/A	#N/A	#N/A
97597	2	-0.112726	-20.9451	-22.0566	2.50152	-8.83067	-20.2966	-21.5711	-8.11638	#N/A	#N/A	#N/A	#N/A	#N/A	#N/A	#N/A	#N/A	#N/A	#N/A	#N/A	#N/A
30390	2	-0.327263	-22.3961	-23.2146	2.71931	0	0	0	-22.8224	#N/A	#N/A	#N/A	#N/A	#N/A	#N/A	#N/A	#N/A	#N/A	#N/A	#N/A	#N/A
34416	2	-0.327263	-22.3961	-23.2146	2.71931	0	0	0	-22.8224	#N/A	#N/A	#N/A	#N/A	#N/A	#N/A	#N/A	#N/A	#N/A	#N/A	#N/A	#N/A
80763	2	-0.327263	-22.3961	-23.2146	2.71931	0	0	0	-22.8224	#N/A	#N/A	#N/A	#N/A	#N/A	#N/A	#N/A	#N/A	#N/A	#N/A	#N/A	#N/A
87293	2	-0.404886	5.25988	-23.9622	-24.0732	-0.218034	-10.117	1.54033	0.774713	#N/A	#N/A	#N/A	#N/A	#N/A	#N/A	#N/A	#N/A	#N/A	#N/A	#N/A	#N/A
102472	2	-0.598045	2.98997	-21.507	-21.5659	20.8654	-7.70139	-21.6453	9.0479	#N/A	#N/A	#N/A	#N/A	#N/A	#N/A	#N/A	#N/A	#N/A	#N/A	#N/A	#N/A
123185	2	-0.729146	-7.12266	-21.8031	3.11974	6.69471	8.51168	-7.01547	-7.9489	#N/A	#N/A	#N/A	#N/A	#N/A	#N/A	#N/A	#N/A	#N/A	#N/A	#N/A	#N/A
247470	2	-0.729146	-7.12266	-21.8031	3.11974	6.69471	8.51168	-7.01547	-7.9489	#N/A	#N/A	#N/A	#N/A	#N/A	#N/A	#N/A	#N/A	#N/A	#N/A	#N/A	#N/A
247993	2	-0.794238	-20.4715	-21.4324	3.18369	0	0	0	-21.2504	#N/A	#N/A	#N/A	#N/A	#N/A	#N/A	#N/A	#N/A	#N/A	#N/A	#N/A	#N/A
160698	2	-0.986899	1.83371	-21.8333	-21.9439	20.8152	2.37213	-22.4026	-21.7355	#N/A	#N/A	#N/A	#N/A	#N/A	#N/A	#N/A	#N/A	#N/A	#N/A	#N/A	#N/A
196821	2	-0.986899	1.83371	-21.8333	-21.9439	20.8152	2.37213	-22.4026	-21.7355	#N/A	#N/A	#N/A	#N/A	#N/A	#N/A	#N/A	#N/A	#N/A	#N/A	#N/A	#N/A
96171	2	-1.35712	2.49995	-21.3516	-21.4544	6.80819	1.5248	-21.3164	-6.76858	#N/A	#N/A	#N/A	#N/A	#N/A	#N/A	#N/A	#N/A	#N/A	#N/A	#N/A	#N/A
150101	2	-1.35712	2.49995	-21.3516	-21.4544	6.80819	1.5248	-21.3164	-6.76858	#N/A	#N/A	#N/A	#N/A	#N/A	#N/A	#N/A	#N/A	#N/A	#N/A	#N/A	#N/A
140394	2	-1.47608	2.04548	-23.1442	1.62172	0	-21.6133	0	-21.928	#N/A	#N/A	#N/A	#N/A	#N/A	#N/A	#N/A	#N/A	#N/A	#N/A	#N/A	#N/A
240046	2	-1.47608	2.04548	-23.1442	1.62172	0	-21.6133	0	-21.928	#N/A	#N/A	#N/A	#N/A	#N/A	#N/A	#N/A	#N/A	#N/A	#N/A	#N/A	#N/A
90544	2	-1.47722	2.04547	-23.4102	1.62231	0	-21.957	0	-22.2492	#N/A	#N/A	#N/A	#N/A	#N/A	#N/A	#N/A	#N/A	#N/A	#N/A	#N/A	#N/A
240045	2	-1.47722	2.04547	-23.4102	1.62231	0	-21.957	0	-22.2492	#N/A	#N/A	#N/A	#N/A	#N/A	#N/A	#N/A	#N/A	#N/A	#N/A	#N/A	#N/A
141875	2	-1.48526	-20.3967	-21.3382	3.87542	0	0	0	-21.2774	#N/A	#N/A	#N/A	#N/A	#N/A	#N/A	#N/A	#N/A	#N/A	#N/A	#N/A	#N/A
245129	2	-1.48526	-20.3967	-21.3382	3.87542	0	0	0	-21.2774	#N/A	#N/A	#N/A	#N/A	#N/A	#N/A	#N/A	#N/A	#N/A	#N/A	#N/A	#N/A
221640	2	-1.56203	-20.4393	-21.4947	3.94788	-8.45335	-6.0552	-6.82881	-7.97157	#N/A	#N/A	#N/A	#N/A	#N/A	#N/A	#N/A	#N/A	#N/A	#N/A	#N/A	#N/A
120742	2	-9.03239	2.64223	-21.8637	2.97506	0	-21.0954	0	-21.5343	#N/A	#N/A	#N/A	#N/A	#N/A	#N/A	#N/A	#N/A	#N/A	#N/A	#N/A	#N/A
124851	2	-9.03239	2.64223	-21.8637	2.97506	0	-21.0954	0	-21.5343	#N/A	#N/A	#N/A	#N/A	#N/A	#N/A	#N/A	#N/A	#N/A	#N/A	#N/A	#N/A
49471	2	-22.3883	-20.576	-21.5828	10.0866	-7.52435	-5.12646	-5.90062	-8.23518	#N/A	#N/A	#N/A	#N/A	#N/A	#N/A	#N/A	#N/A	#N/A	#N/A	#N/A	#N/A
79938	2	-22.3883	-20.576	-21.5828	10.0866	-7.52435	-5.12646	-5.90062	-8.23518	#N/A	#N/A	#N/A	#N/A	#N/A	#N/A	#N/A	#N/A	#N/A	#N/A	#N/A	#N/A
130989	2	-22.4577	10.2082	-21.6829	-21.793	22.0502	-8.5917	-22.3478	9.82516	#N/A	#N/A	#N/A	#N/A	#N/A	#N/A	#N/A	#N/A	#N/A	#N/A	#N/A	#N/A
55967	2	29.9638	-20.613	-21.6362	-21.7069	6.30557	-5.85292	8.09742	-6.26674	#N/A	#N/A	#N/A	#N/A	#N/A	#N/A	#N/A	#N/A	#N/A	#N/A	#N/A	#N/A
98617	2	29.9638	-20.613	-21.6362	-21.7069	6.30557	-5.85292	8.09742	-6.26674	#N/A	#N/A	#N/A	#N/A	#N/A	#N/A	#N/A	#N/A	#N/A	#N/A	#N/A	#N/A
30402	2	29.9598	-19.5407	-6.55157	-6.61055	5.6548	-5.2032	7.44804	-5.6164	#N/A	#N/A	#N/A	#N/A	#N/A	#N/A	#N/A	#N/A	#N/A	#N/A	#N/A	#N/A
116861	2	29.9501	-19.9297	-6.69542	-6.7544	5.03821	-4.58857	6.82573	-5.00068	#N/A	#N/A	#N/A	#N/A	#N/A	#N/A	#N/A	#N/A	#N/A	#N/A	#N/A	#N/A
28360	2	29.9167	-19.4698	-6.52841	-6.5874	5.55106	-5.09961	7.34388	-5.51271	#N/A	#N/A	#N/A	#N/A	#N/A	#N/A	#N/A	#N/A	#N/A	#N/A	#N/A	#N/A
43903	2	29.9167	-19.4698	-6.52841	-6.5874	5.55106	-5.09961	7.34388	-5.51271	#N/A	#N/A	#N/A	#N/A	#N/A	#N/A	#N/A	#N/A	#N/A	#N/A	#N/A	#N/A
113835	2	29.9167	-19.4698	-6.52841	-6.5874	5.55106	-5.09961	7.34388	-5.51271	#N/A	#N/A	#N/A	#N/A	#N/A	#N/A	#N/A	#N/A	#N/A	#N/A	#N/A	#N/A
162098	2	29.9167	-19.4698	-6.52841	-6.5874	5.55106	-5.09961	7.34388	-5.51271	#N/A	#N/A	#N/A	#N/A	#N/A	#N/A	#N/A	#N/A	#N/A	#N/A	#N/A	#N/A
125837	2	29.8652	-5.79279	-5.86782	-5.92682	5.73097	7.54615	-6.05198	-5.69136	#N/A	#N/A	#N/A	#N/A	#N/A	#N/A	#N/A	#N/A	#N/A	#N/A	#N/A	#N/A
71735	2	27.6611	-5.04628	-6.69599	-6.75497	6.35355	-5.90077	8.15021	-6.31463	#N/A	#N/A	#N/A	#N/A	#N/A	#N/A	#N/A	#N/A	#N/A	#N/A	#N/A	#N/A
151731	2	27.6611	-5.04628	-6.69599	-6.75497	6.35355	-5.90077	8.15021	-6.31463	#N/A	#N/A	#N/A	#N/A	#N/A	#N/A	#N/A	#N/A	#N/A	#N/A	#N/A	#N/A
142610	2	27.0369	-20.0837	-21.0109	-21.2783	5.4276	-4.97672	7.22514	-5.38955	#N/A	#N/A	#N/A	#N/A	#N/A	#N/A	#N/A	#N/A	#N/A	#N/A	#N/A	#N/A
208825	2	27.0369	-20.0837	-21.0109	-21.2783	5.4276	-4.97672	7.22514	-5.38955	#N/A	#N/A	#N/A	#N/A	#N/A	#N/A	#N/A	#N/A	#N/A	#N/A	#N/A	#N/A
27752	2	24.3186	-20.0694	-21.2962	-21.3456	6.258	-5.80539	8.05179	-6.21917	#N/A	#N/A	#N/A	#N/A	#N/A	#N/A	#N/A	#N/A	#N/A	#N/A	#N/A	#N/A
202972	2	24.3186	-20.0694	-21.2962	-21.3456	6.258	-5.80539	8.05179	-6.21917	#N/A	#N/A	#N/A	#N/A	#N/A	#N/A	#N/A	#N/A	#N/A	#N/A	#N/A	#N/A
143384	2	23.0422	-20.3765	-21.4706	-21.603	6.27077	-5.81917	8.06658	-6.2319	#N/A	#N/A	#N/A	#N/A	#N/A	#N/A	#N/A	#N/A	#N/A	#N/A	#N/A	#N/A
120808	2	8.39293	-21.013	-8.03773	-8.0967	6.02595	-5.57476	7.81711	-5.98759	#N/A	#N/A	#N/A	#N/A	#N/A	#N/A	#N/A	#N/A	#N/A	#N/A	#N/A	#N/A
55509	2	8.38399	-21.0854	-8.02319	-8.08216	5.97933	-5.52825	7.76385	-5.94098	#N/A	#N/A	#N/A	#N/A	#N/A	#N/A	#N/A	#N/A	#N/A	#N/A	#N/A	#N/A
85553	2	8.38399	-21.0854	-8.02319	-8.08216	5.97933	-5.52825	7.76385	-5.94098	#N/A	#N/A	#N/A	#N/A	#N/A	#N/A	#N/A	#N/A	#N/A	#N/A	#N/A	#N/A
28095	2	7.99443	-20.6729	-7.68558	-7.74455	5.91034	-5.45937	7.6959	-5.87206	#N/A	#N/A	#N/A	#N/A	#N/A	#N/A	#N/A	#N/A	#N/A	#N/A	#N/A	#N/A
36425	2	7.99443	-20.6729	-7.68558	-7.74455	5.91034	-5.45937	7.6959	-5.87206	#N/A	#N/A	#N/A	#N/A	#N/A	#N/A	#N/A	#N/A	#N/A	#N/A	#N/A	#N/A
41194	2	7.99443	-20.6729	-7.68558	-7.74455	5.91034	-5.45937	7.6959	-5.87206	#N/A	#N/A	#N/A	#N/A	#N/A	#N/A	#N/A	#N/A	#N/A	#N/A	#N/A	#N/A
136865	2	7.99443	-20.6729	-7.68558	-7.74455	5.91034	-5.45937	7.6959	-5.87206	#N/A	#N/A	#N/A	#N/A	#N/A	#N/A	#N/A	#N/A	#N/A	#N/A	#N/A	#N/A
103120	2	7.95071	-20.6388	-7.74708	-7.80605	6.37761	-5.92482	8.16748	-6.33868	#N/A	#N/A	#N/A	#N/A	#N/A	#N/A	#N/A	#N/A	#N/A	#N/A	#N/A	#N/A
155661	2	7.95071	-20.6388	-7.74708	-7.80605	6.37761	-5.92482	8.16748	-6.33868	#N/A	#N/A	#N/A	#N/A	#N/A	#N/A	#N/A	#N/A	#N/A	#N/A	#N/A	#N/A
66338	2	7.9503	-20.7377	-7.7556	-7.81457	6.41481	-5.96199	8.20572	-6.37588	#N/A	#N/A	#N/A	#N/A	#N/A	#N/A	#N/A	#N/A	#N/A	#N/A	#N/A	#N/A
145191	2	7.9503	-20.7377	-7.7556	-7.81457	6.41481	-5.96199	8.20572	-6.37588	#N/A	#N/A	#N/A	#N/A	#N/A	#N/A	#N/A	#N/A	#N/A	#N/A	#N/A	#N/A
178638	2	7.9503	-20.7377	-7.7556	-7.81457	6.41481	-5.96199	8.20572	-6.37588	#N/A	#N/A	#N/A	#N/A	#N/A	#N/A	#N/A	#N/A	#N/A	#N/A	#N/A	#N/A
106022	2	7.88891	-20.7363	-7.68579	-7.74477	6.3181	-5.86537	8.11213	-6.2792	#N/A	#N/A	#N/A	#N/A	#N/A	#N/A	#N/A	#N/A	#N/A	#N/A	#N/A	#N/A
198154	2	7.88891	-20.7363	-7.68579	-7.74477	6.3181	-5.86537	8.11213	-6.2792	#N/A	#N/A	#N/A	#N/A	#N/A	#N/A	#N/A	#N/A	#N/A	#N/A	#N/A	#N/A
39835	2	7.81252	-20.5134	-7.56395	-7.62293	6.04109	-5.5909	7.82797	-6.00301	#N/A	#N/A	#N/A	#N/A	#N/A	#N/A	#N/A	#N/A	#N/A	#N/A	#N/A	#N/A
129078	2	7.81252	-20.5134	-7.56395	-7.62293	6.04109	-5.5909	7.82797	-6.00301	#N/A	#N/A	#N/A	#N/A	#N/A	#N/A	#N/A	#N/A	#N/A	#N/A	#N/A	#N/A
242065	2	7.8025	-20.5975	-7.58085	-7.63982	6.15124	-5.69872	7.93942	-6.11242	#N/A	#N/A	#N/A	#N/A	#N/A	#N/A	#N/A	#N/A	#N/A	#N/A	#N/A	#N/A
155080	2	7.762	-20.5901	-7.50455	-7.56353	5.94674	-5.49569	7.73752	-5.90838	#N/A	#N/A	#N/A	#N/A	#N/A	#N/A	#N/A	#N/A	#N/A	#N/A	#N/A	#N/A
200530	2	7.762	-20.5901	-7.50455	-7.56353	5.94674	-5.49569	7.73752	-5.90838	#N/A	#N/A	#N/A	#N/A	#N/A	#N/A	#N/A	#N/A	#N/A	#N/A	#N/A	#N/A
64522	2	7.64426	-20.5131	-7.44491	-7.50389	6.08958	-5.63724	7.88825	-6.05088	#N/A	#N/A	#N/A	#N/A	#N/A	#N/A	#N/A	#N/A	#N/A	#N/A	#N/A	#N/A
124048	2	7.64426	-20.5131	-7.44491	-7.50389	6.08958	-5.63724	7.88825	-6.05088	#N/A	#N/A	#N/A	#N/A	#N/A	#N/A	#N/A	#N/A	#N/A	#N/A	#N/A	#N/A
149524	2	7.62395	-20.8392	-7.49478	-7.55375	6.34409	-5.89144	8.14274	-6.30527	#N/A	#N/A	#N/A	#N/A	#N/A	#N/A	#N/A	#N/A	#N/A	#N/A	#N/A	#N/A
222388	2	7.62201	-20.3942	-7.29757	-7.35654	5.4502	-5.00107	7.24331	-5.41272	#N/A	#N/A	#N/A	#N/A	#N/A	#N/A	#N/A	#N/A	#N/A	#N/A	#N/A	#N/A
98128	2	7.61606	-20.3771	-7.39666	-7.45565	5.97947	-5.52944	7.78181	-5.94127	#N/A	#N/A	#N/A	#N/A	#N/A	#N/A	#N/A	#N/A	#N/A	#N/A	#N/A	#N/A
145996	2	7.60443	-20.4548	-7.49773	-7.5567	6.40489	-5.95207	8.19756	-6.36595	#N/A	#N/A	#N/A	#N/A	#N/A	#N/A	#N/A	#N/A	#N/A	#N/A	#N/A	#N/A
43421	2	7.58704	-20.3518	-7.17526	-7.23426	4.80451	-4.36133	6.58011	-4.76817	#N/A	#N/A	#N/A	#N/A	#N/A	#N/A	#N/A	#N/A	#N/A	#N/A	#N/A	#N/A
121853	2	7.58617	-20.3835	-7.28991	-7.3489	5.57348	-5.12364	7.37221	-5.53555	#N/A	#N/A	#N/A	#N/A	#N/A	#N/A	#N/A	#N/A	#N/A	#N/A	#N/A	#N/A
51045	2	7.58249	-20.362	-7.33783	-7.39681	5.82739	-5.37613	7.6148	-5.78899	#N/A	#N/A	#N/A	#N/A	#N/A	#N/A	#N/A	#N/A	#N/A	#N/A	#N/A	#N/A
175453	2	7.58249	-20.362	-7.33783	-7.39681	5.82739	-5.37613	7.6148	-5.78899	#N/A	#N/A	#N/A	#N/A	#N/A	#N/A	#N/A	#N/A	#N/A	#N/A	#N/A	#N/A
221088	2	7.58249	-20.362	-7.33783	-7.39681	5.82739	-5.37613	7.6148	-5.78899	#N/A	#N/A	#N/A	#N/A	#N/A	#N/A	#N/A	#N/A	#N/A	#N/A	#N/A	#N/A
221089	2	7.58249	-20.362	-7.33783	-7.39681	5.82739	-5.37613	7.6148	-5.78899	#N/A	#N/A	#N/A	#N/A	#N/A	#N/A	#N/A	#N/A	#N/A	#N/A	#N/A	#N/A
140467	2	7.55865	-20.3705	-7.21583	-7.27481	5.27269	-4.82332	7.06768	-5.23505	#N/A	#N/A	#N/A	#N/A	#N/A	#N/A	#N/A	#N/A	#N/A	#N/A	#N/A	#N/A
205554	2	7.55865	-20.3705	-7.21583	-7.27481	5.27269	-4.82332	7.06768	-5.23505	#N/A	#N/A	#N/A	#N/A	#N/A	#N/A	#N/A	#N/A	#N/A	#N/A	#N/A	#N/A
95604	2	7.55137	-20.298	-7.39031	-7.44929	6.15126	-5.69874	7.93851	-6.11244	#N/A	#N/A	#N/A	#N/A	#N/A	#N/A	#N/A	#N/A	#N/A	#N/A	#N/A	#N/A
129645	2	7.44661	-20.206	-7.26325	-7.32224	5.96163	-5.51149	7.74214	-5.9233	#N/A	#N/A	#N/A	#N/A	#N/A	#N/A	#N/A	#N/A	#N/A	#N/A	#N/A	#N/A
14877	3	-0.429048	-9.97742	1.02068	1.42756	2.34692	2.12998	-10.9854	0.604178	#N/A	#N/A	#N/A	#N/A	#N/A	#N/A	#N/A	#N/A	#N/A	#N/A	#N/A	#N/A
16836	3	-0.232283	-8.85916	-0.464918	1.12213	9.25664	-0.623509	2.73787	-2.3586	#N/A	#N/A	#N/A	#N/A	#N/A	#N/A	#N/A	#N/A	#N/A	#N/A	#N/A	#N/A
17715	3	-0.232283	-8.85916	-0.464918	1.12213	9.25664	-0.623509	2.73787	-2.3586	#N/A	#N/A	#N/A	#N/A	#N/A	#N/A	#N/A	#N/A	#N/A	#N/A	#N/A	#N/A
23900	3	1.45942	-0.235737	-0.64033	-8.80575	7.60127	0.636284	0.700274	0.272266	#N/A	#N/A	#N/A	#N/A	#N/A	#N/A	#N/A	#N/A	#N/A	#N/A	#N/A	#N/A
24817	3	0.787979	0.16439	0.00299527	-7.89642	7.28399	0.515293	0.257838	1.08997	#N/A	#N/A	#N/A	#N/A	#N/A	#N/A	#N/A	#N/A	#N/A	#N/A	#N/A	#N/A
26361	3	-6.56659	-5.13534	1.52405	1.52059	6.96479	0.433228	0.720321	0.778184	#N/A	#N/A	#N/A	#N/A	#N/A	#N/A	#N/A	#N/A	#N/A	#N/A	#N/A	#N/A
26686	3	0.140479	0.609567	-9.62983	0.821926	8.01029	-0.577865	0.999876	-0.041188	#N/A	#N/A	#N/A	#N/A	#N/A	#N/A	#N/A	#N/A	#N/A	#N/A	#N/A	#N/A
26894	3	0.158667	-7.80298	0.0864009	0.812359	8.02364	1.55465	0.699659	-0.657284	#N/A	#N/A	#N/A	#N/A	#N/A	#N/A	#N/A	#N/A	#N/A	#N/A	#N/A	#N/A
28089	3	0.634037	-8.31675	-0.420517	0.769034	8.85867	1.066	-0.572236	1.21964	#N/A	#N/A	#N/A	#N/A	#N/A	#N/A	#N/A	#N/A	#N/A	#N/A	#N/A	#N/A
29898	3	1.30727	-8.44771	-9.11834	0.736924	9.07872	1.01066	0.682379	0.675236	#N/A	#N/A	#N/A	#N/A	#N/A	#N/A	#N/A	#N/A	#N/A	#N/A	#N/A	#N/A
30203	3	8.64939	-7.59477	-8.48235	-8.54134	8.05039	0.842964	2.39473	-0.853537	#N/A	#N/A	#N/A	#N/A	#N/A	#N/A	#N/A	#N/A	#N/A	#N/A	#N/A	#N/A
31045	3	1.2044	-8.26041	-0.826443	0.226075	8.22991	2.31286	0.151723	-0.643202	#N/A	#N/A	#N/A	#N/A	#N/A	#N/A	#N/A	#N/A	#N/A	#N/A	#N/A	#N/A
31421	3	7.7122	-6.63253	-7.65139	-7.71038	7.5401	0.0412405	2.29249	0.367219	#N/A	#N/A	#N/A	#N/A	#N/A	#N/A	#N/A	#N/A	#N/A	#N/A	#N/A	#N/A
32291	3	0.553496	-7.50425	0.295138	0.0754717	7.89399	1.0744	0.409998	0.477309	#N/A	#N/A	#N/A	#N/A	#N/A	#N/A	#N/A	#N/A	#N/A	#N/A	#N/A	#N/A
32680	3	-0.225451	-8.65245	0.7371	0.579979	8.81368	0.930616	1.22951	-1.51468	#N/A	#N/A	#N/A	#N/A	#N/A	#N/A	#N/A	#N/A	#N/A	#N/A	#N/A	#N/A
35289	3	6.83797	-5.96715	-6.73082	-6.78987	7.00125	1.02974	1.34214	0.578217	#N/A	#N/A	#N/A	#N/A	#N/A	#N/A	#N/A	#N/A	#N/A	#N/A	#N/A	#N/A
37312	3	1.20766	-9.29246	1.05564	-10.0242	9.00012	0.722908	-0.875504	1.99626	#N/A	#N/A	#N/A	#N/A	#N/A	#N/A	#N/A	#N/A	#N/A	#N/A	#N/A	#N/A
38221	3	0.881147	-9.68025	-0.0616923	-0.0155176	9.62849	0.569075	1.01937	-0.014103	#N/A	#N/A	#N/A	#N/A	#N/A	#N/A	#N/A	#N/A	#N/A	#N/A	#N/A	#N/A
38673	3	7.85	-6.54686	-7.54943	-7.60844	5.8272	-5.37755	7.61707	-5.78909	#N/A	#N/A	#N/A	#N/A	#N/A	#N/A	#N/A	#N/A	#N/A	#N/A	#N/A	#N/A
38846	3	0.412771	-9.62951	0.376011	0.283362	9.74824	0.674474	0.654199	0.248055	#N/A	#N/A	#N/A	#N/A	#N/A	#N/A	#N/A	#N/A	#N/A	#N/A	#N/A	#N/A
40063	3	1.97406	-0.926368	-8.53043	-0.911853	7.84643	2.03047	-0.867041	0.205339	#N/A	#N/A	#N/A	#N/A	#N/A	#N/A	#N/A	#N/A	#N/A	#N/A	#N/A	#N/A
40923	3	0.506667	-7.89331	0.546838	-0.00539932	7.94538	0.721561	0.335675	0.534018	#N/A	#N/A	#N/A	#N/A	#N/A	#N/A	#N/A	#N/A	#N/A	#N/A	#N/A	#N/A
40939	3	8.14806	-6.84797	-7.55763	-7.61661	5.78147	-5.33037	-6.10419	7.68023	#N/A	#N/A	#N/A	#N/A	#N/A	#N/A	#N/A	#N/A	#N/A	#N/A	#N/A	#N/A
41355	3	0.699473	-7.13879	0.150602	0.0139362	7.36815	0.751469	0.550057	0.503912	#N/A	#N/A	#N/A	#N/A	#N/A	#N/A	#N/A	#N/A	#N/A	#N/A	#N/A	#N/A
41374	3	0.408886	-9.76732	-0.414678	0.153463	10.9026	1.36007	1.42605	-0.699842	#N/A	#N/A	#N/A	#N/A	#N/A	#N/A	#N/A	#N/A	#N/A	#N/A	#N/A	#N/A
41534	3	1.11353	0.0272425	-8.77262	-0.193645	6.77823	-7.09017	8.56413	-7.52875	#N/A	#N/A	#N/A	#N/A	#N/A	#N/A	#N/A	#N/A	#N/A	#N/A	#N/A	#N/A
41665	3	0.113098	-8.54646	-1.08807	1.55147	8.21994	2.63353	0.95129	-9.13163	#N/A	#N/A	#N/A	#N/A	#N/A	#N/A	#N/A	#N/A	#N/A	#N/A	#N/A	#N/A
43183	3	0.699473	-7.13879	0.150602	0.0139362	7.36815	0.751469	0.550057	0.503912	#N/A	#N/A	#N/A	#N/A	#N/A	#N/A	#N/A	#N/A	#N/A	#N/A	#N/A	#N/A
43665	3	-0.746706	1.56657	-10.2297	1.22809	1.80885	-9.93638	-1.32867	2.01171	#N/A	#N/A	#N/A	#N/A	#N/A	#N/A	#N/A	#N/A	#N/A	#N/A	#N/A	#N/A
45847	3	0.113098	-8.54646	-1.08807	1.55147	8.21994	2.63353	0.95129	-9.13163	#N/A	#N/A	#N/A	#N/A	#N/A	#N/A	#N/A	#N/A	#N/A	#N/A	#N/A	#N/A
46546	3	1.45942	-0.235737	-0.64033	-8.80575	7.60127	0.636284	0.700274	0.272266	#N/A	#N/A	#N/A	#N/A	#N/A	#N/A	#N/A	#N/A	#N/A	#N/A	#N/A	#N/A
47692	3	0.0783303	-8.52242	1.00339	0.736651	6.96515	8.77804	-8.63216	-8.14755	#N/A	#N/A	#N/A	#N/A	#N/A	#N/A	#N/A	#N/A	#N/A	#N/A	#N/A	#N/A
48236	3	0.340074	-0.340428	-9.62839	0.81251	9.17278	1.19332	1.50639	-1.26987	#N/A	#N/A	#N/A	#N/A	#N/A	#N/A	#N/A	#N/A	#N/A	#N/A	#N/A	#N/A
48383	3	-1.36425	-8.77829	1.61703	1.93859	1.49389	0.395008	-9.93861	1.13585	#N/A	#N/A	#N/A	#N/A	#N/A	#N/A	#N/A	#N/A	#N/A	#N/A	#N/A	#N/A
48502	3	0.142276	0.574024	-9.15578	0.738544	8.20546	0.190335	0.417925	0.401097	#N/A	#N/A	#N/A	#N/A	#N/A	#N/A	#N/A	#N/A	#N/A	#N/A	#N/A	#N/A
48633	3	0.573548	-7.99167	1.27806	-0.801044	-1.655	-0.377907	-9.11826	0.636479	#N/A	#N/A	#N/A	#N/A	#N/A	#N/A	#N/A	#N/A	#N/A	#N/A	#N/A	#N/A
49143	3	0.560889	-1.41953	1.002	-9.58286	8.926	1.8801	0.740024	-8.88694	#N/A	#N/A	#N/A	#N/A	#N/A	#N/A	#N/A	#N/A	#N/A	#N/A	#N/A	#N/A
49776	3	8.75279	-7.6649	-8.67979	-8.73877	8.85759	-0.369001	1.65569	1.39334	#N/A	#N/A	#N/A	#N/A	#N/A	#N/A	#N/A	#N/A	#N/A	#N/A	#N/A	#N/A
49861	3	0.289366	-8.68864	0.699339	0.299133	8.90364	0.850266	-0.244801	0.973954	#N/A	#N/A	#N/A	#N/A	#N/A	#N/A	#N/A	#N/A	#N/A	#N/A	#N/A	#N/A
50891	3	0.533041	-8.765	0.261664	0.187742	9.06209	0.683376	0.543718	0.575252	#N/A	#N/A	#N/A	#N/A	#N/A	#N/A	#N/A	#N/A	#N/A	#N/A	#N/A	#N/A
51406	3	0.0840719	-8.81996	1.07286	0.64875	-0.3313	0.850916	-9.98145	0.743923	#N/A	#N/A	#N/A	#N/A	#N/A	#N/A	#N/A	#N/A	#N/A	#N/A	#N/A	#N/A
51630	3	7.5529	-6.25275	-7.44284	-7.50183	6.3445	-5.89321	8.13809	-6.30584	#N/A	#N/A	#N/A	#N/A	#N/A	#N/A	#N/A	#N/A	#N/A	#N/A	#N/A	#N/A
51669	3	0.344016	-9.50527	-0.1655	0.650836	10.1442	1.25993	0.679319	0.147393	#N/A	#N/A	#N/A	#N/A	#N/A	#N/A	#N/A	#N/A	#N/A	#N/A	#N/A	#N/A
52591	3	8.19506	-7.14777	-7.60433	-7.66331	5.93401	7.75261	-6.25667	-5.89529	#N/A	#N/A	#N/A	#N/A	#N/A	#N/A	#N/A	#N/A	#N/A	#N/A	#N/A	#N/A
53518	3	0.135147	-8.33452	-0.0895371	0.938423	8.1098	1.48687	1.54082	-8.84866	#N/A	#N/A	#N/A	#N/A	#N/A	#N/A	#N/A	#N/A	#N/A	#N/A	#N/A	#N/A
53585	3	0.226046	0.581176	-10.0829	0.637082	8.68615	0.359974	0.853362	-0.577704	#N/A	#N/A	#N/A	#N/A	#N/A	#N/A	#N/A	#N/A	#N/A	#N/A	#N/A	#N/A
53835	3	1.16115	-8.28909	-0.872448	0.594717	7.0212	8.83711	-7.82524	-7.96278	#N/A	#N/A	#N/A	#N/A	#N/A	#N/A	#N/A	#N/A	#N/A	#N/A	#N/A	#N/A
55148	3	9.07518	-7.77469	-8.48437	-8.54334	6.22241	-5.77243	-6.5459	8.12124	#N/A	#N/A	#N/A	#N/A	#N/A	#N/A	#N/A	#N/A	#N/A	#N/A	#N/A	#N/A
55840	3	0.140744	0.684931	-11.2511	0.361632	10.8545	0.63042	0.691013	0.301192	#N/A	#N/A	#N/A	#N/A	#N/A	#N/A	#N/A	#N/A	#N/A	#N/A	#N/A	#N/A
56206	3	0.460468	-8.54605	1.01169	-0.497505	8.1699	0.523103	0.0690748	0.542572	#N/A	#N/A	#N/A	#N/A	#N/A	#N/A	#N/A	#N/A	#N/A	#N/A	#N/A	#N/A
56372	3	0.00185658	0.282903	0.842185	-9.05838	-0.480397	-8.74249	1.06369	0.168251	#N/A	#N/A	#N/A	#N/A	#N/A	#N/A	#N/A	#N/A	#N/A	#N/A	#N/A	#N/A
56458	3	1.20766	-9.29246	1.05564	-10.0242	9.00012	0.722908	-0.875504	1.99626	#N/A	#N/A	#N/A	#N/A	#N/A	#N/A	#N/A	#N/A	#N/A	#N/A	#N/A	#N/A
56472	3	0.140744	0.684931	-11.2511	0.361632	10.8545	0.63042	0.691013	0.301192	#N/A	#N/A	#N/A	#N/A	#N/A	#N/A	#N/A	#N/A	#N/A	#N/A	#N/A	#N/A
57168	3	1.61456	-8.03038	-8.82065	0.40098	8.49231	0.641446	1.35772	0.385031	#N/A	#N/A	#N/A	#N/A	#N/A	#N/A	#N/A	#N/A	#N/A	#N/A	#N/A	#N/A
58633	3	0.550458	-6.90184	1.83961	-21.4688	6.19723	8.0105	-7.61965	-6.15759	#N/A	#N/A	#N/A	#N/A	#N/A	#N/A	#N/A	#N/A	#N/A	#N/A	#N/A	#N/A
58897	3	0.689679	0.252174	0.0388071	-9.22481	0.00342383	0.622796	0.579749	-8.43059	#N/A	#N/A	#N/A	#N/A	#N/A	#N/A	#N/A	#N/A	#N/A	#N/A	#N/A	#N/A
59262	3	8.64939	-7.59477	-8.48235	-8.54134	8.05039	0.842964	2.39473	-0.853537	#N/A	#N/A	#N/A	#N/A	#N/A	#N/A	#N/A	#N/A	#N/A	#N/A	#N/A	#N/A
59912	3	0.573578	-7.9916	1.27806	-0.801052	-1.65498	-0.377905	-9.1181	0.636464	#N/A	#N/A	#N/A	#N/A	#N/A	#N/A	#N/A	#N/A	#N/A	#N/A	#N/A	#N/A
60296	3	-0.729325	-7.00455	3.11449	-21.5558	-1.14555	1.20036	-9.04559	0.103875	#N/A	#N/A	#N/A	#N/A	#N/A	#N/A	#N/A	#N/A	#N/A	#N/A	#N/A	#N/A
60575	3	7.98812	-6.68769	-7.71399	-7.77298	6.09308	-5.64253	7.88036	-6.05469	#N/A	#N/A	#N/A	#N/A	#N/A	#N/A	#N/A	#N/A	#N/A	#N/A	#N/A	#N/A
60693	3	1.50705	-8.08095	0.620556	-8.86497	7.95274	1.2014	0.464616	0.334517	#N/A	#N/A	#N/A	#N/A	#N/A	#N/A	#N/A	#N/A	#N/A	#N/A	#N/A	#N/A
61654	3	0.412771	-9.62951	0.376011	0.283362	9.74824	0.674474	0.654199	0.248055	#N/A	#N/A	#N/A	#N/A	#N/A	#N/A	#N/A	#N/A	#N/A	#N/A	#N/A	#N/A
61823	3	-0.0165918	0.469362	-8.66067	0.668901	8.21861	0.513903	1.83155	-0.840294	#N/A	#N/A	#N/A	#N/A	#N/A	#N/A	#N/A	#N/A	#N/A	#N/A	#N/A	#N/A
62024	3	7.83492	-6.83237	-7.65053	-7.70951	7.82515	0.443959	1.1692	1.32701	#N/A	#N/A	#N/A	#N/A	#N/A	#N/A	#N/A	#N/A	#N/A	#N/A	#N/A	#N/A
62721	3	0.560889	-1.41953	1.002	-9.58286	8.926	1.8801	0.740024	-8.88694	#N/A	#N/A	#N/A	#N/A	#N/A	#N/A	#N/A	#N/A	#N/A	#N/A	#N/A	#N/A
63526	3	0.00185658	0.282903	0.842185	-9.05838	-0.480397	-8.74249	1.06369	0.168251	#N/A	#N/A	#N/A	#N/A	#N/A	#N/A	#N/A	#N/A	#N/A	#N/A	#N/A	#N/A
64439	3	0.208133	1.14031	-9.28688	0.163137	-1.08159	-8.97941	0.376486	0.507862	#N/A	#N/A	#N/A	#N/A	#N/A	#N/A	#N/A	#N/A	#N/A	#N/A	#N/A	#N/A
64612	3	0.467861	0.291917	-9.33184	0.594307	8.0446	0.381674	0.102054	0.245706	#N/A	#N/A	#N/A	#N/A	#N/A	#N/A	#N/A	#N/A	#N/A	#N/A	#N/A	#N/A
64817	3	0.814904	-7.68575	0.223268	-0.154765	7.65019	1.14169	0.50215	0.08391	#N/A	#N/A	#N/A	#N/A	#N/A	#N/A	#N/A	#N/A	#N/A	#N/A	#N/A	#N/A
65080	3	-1.48154	-7.14802	3.86952	-21.6326	6.95988	8.77893	-8.54257	-21.1418	#N/A	#N/A	#N/A	#N/A	#N/A	#N/A	#N/A	#N/A	#N/A	#N/A	#N/A	#N/A
65350	3	0.808412	-7.74389	0.0785545	-0.0805549	7.84781	0.809616	0.781495	0.153012	#N/A	#N/A	#N/A	#N/A	#N/A	#N/A	#N/A	#N/A	#N/A	#N/A	#N/A	#N/A
65994	3	7.19243	-6.47881	-7.28601	-7.345	7.95364	0.950147	1.37374	0.639225	#N/A	#N/A	#N/A	#N/A	#N/A	#N/A	#N/A	#N/A	#N/A	#N/A	#N/A	#N/A
66082	3	6.17653	-6.11936	-6.8483	-6.90731	8.37996	0.954992	0.989156	1.05083	#N/A	#N/A	#N/A	#N/A	#N/A	#N/A	#N/A	#N/A	#N/A	#N/A	#N/A	#N/A
66178	3	1.79944	-8.04719	0.377146	-8.68427	8.56756	1.13295	-0.519602	1.7516	#N/A	#N/A	#N/A	#N/A	#N/A	#N/A	#N/A	#N/A	#N/A	#N/A	#N/A	#N/A
67166	3	0.573578	-7.9916	1.27806	-0.801052	-1.65498	-0.377905	-9.1181	0.636464	#N/A	#N/A	#N/A	#N/A	#N/A	#N/A	#N/A	#N/A	#N/A	#N/A	#N/A	#N/A
67275	3	-1.13144	0.376609	-8.94614	2.08442	8.54987	0.581069	0.677582	-0.082026	#N/A	#N/A	#N/A	#N/A	#N/A	#N/A	#N/A	#N/A	#N/A	#N/A	#N/A	#N/A
67532	3	0.808412	-7.74389	0.0785545	-0.0805549	7.84781	0.809616	0.781495	0.153012	#N/A	#N/A	#N/A	#N/A	#N/A	#N/A	#N/A	#N/A	#N/A	#N/A	#N/A	#N/A
68072	3	1.23207	-8.81102	-0.846083	-0.0198309	8.5749	-8.12119	2.26591	0.004752	#N/A	#N/A	#N/A	#N/A	#N/A	#N/A	#N/A	#N/A	#N/A	#N/A	#N/A	#N/A
68789	3	1.21283	-8.49575	0.918804	-9.31177	8.36416	0.732493	0.304217	0.877478	#N/A	#N/A	#N/A	#N/A	#N/A	#N/A	#N/A	#N/A	#N/A	#N/A	#N/A	#N/A
69471	3	0.184798	-7.79288	0.479067	0.421929	8.0233	0.965619	0.738912	-0.139194	#N/A	#N/A	#N/A	#N/A	#N/A	#N/A	#N/A	#N/A	#N/A	#N/A	#N/A	#N/A
69842	3	0.528507	0.420648	0.21669	-9.15547	8.229	-0.395759	0.931023	0.803776	#N/A	#N/A	#N/A	#N/A	#N/A	#N/A	#N/A	#N/A	#N/A	#N/A	#N/A	#N/A
70323	3	-9.78701	0.952184	1.82114	2.19705	20.9407	1.85993	-8.75181	-8.53472	#N/A	#N/A	#N/A	#N/A	#N/A	#N/A	#N/A	#N/A	#N/A	#N/A	#N/A	#N/A
72191	3	-0.185531	0.976827	-9.74059	0.78131	21.7118	-8.5358	9.79599	-9.02014	#N/A	#N/A	#N/A	#N/A	#N/A	#N/A	#N/A	#N/A	#N/A	#N/A	#N/A	#N/A
72834	3	1.09614	-0.582602	-8.40108	0.213988	7.64364	0.343715	1.02645	0.486274	#N/A	#N/A	#N/A	#N/A	#N/A	#N/A	#N/A	#N/A	#N/A	#N/A	#N/A	#N/A
73044	3	0.573799	-8.92837	0.216224	0.199983	0.372495	-8.36164	1.10557	-0.154131	#N/A	#N/A	#N/A	#N/A	#N/A	#N/A	#N/A	#N/A	#N/A	#N/A	#N/A	#N/A
73853	3	7.08343	-6.28777	-7.04025	-7.09926	7.6312	0.86299	1.06504	1.0613	#N/A	#N/A	#N/A	#N/A	#N/A	#N/A	#N/A	#N/A	#N/A	#N/A	#N/A	#N/A
74799	3	-0.314165	-9.36253	-1.36534	1.82005	9.3299	-0.79004	2.26678	-1.00248	#N/A	#N/A	#N/A	#N/A	#N/A	#N/A	#N/A	#N/A	#N/A	#N/A	#N/A	#N/A
75910	3	0.140744	0.684931	-11.2511	0.361632	10.8545	0.63042	0.691013	0.301192	#N/A	#N/A	#N/A	#N/A	#N/A	#N/A	#N/A	#N/A	#N/A	#N/A	#N/A	#N/A
76318	3	-0.323125	0.70524	-9.05199	0.462799	9.00065	-0.37098	2.76541	-0.720457	#N/A	#N/A	#N/A	#N/A	#N/A	#N/A	#N/A	#N/A	#N/A	#N/A	#N/A	#N/A
76689	3	0.140743	0.684931	-11.2512	0.361633	10.6579	0.821359	0.975144	-0.446591	#N/A	#N/A	#N/A	#N/A	#N/A	#N/A	#N/A	#N/A	#N/A	#N/A	#N/A	#N/A
77397	3	8.79135	-7.64253	-8.70058	-8.75955	8.56556	-0.58552	2.18993	0.935588	#N/A	#N/A	#N/A	#N/A	#N/A	#N/A	#N/A	#N/A	#N/A	#N/A	#N/A	#N/A
78933	3	1.43396	-8.44681	0.338711	-2.19411	8.45451	0.678317	0.738388	0.543183	#N/A	#N/A	#N/A	#N/A	#N/A	#N/A	#N/A	#N/A	#N/A	#N/A	#N/A	#N/A
79521	3	0.227509	0.469999	-9.10338	0.750177	7.91153	0.309337	0.37518	0.115452	#N/A	#N/A	#N/A	#N/A	#N/A	#N/A	#N/A	#N/A	#N/A	#N/A	#N/A	#N/A
80090	3	0.453573	0.270748	-8.82886	0.6204	7.54712	0.594307	0.075495	0.033695	#N/A	#N/A	#N/A	#N/A	#N/A	#N/A	#N/A	#N/A	#N/A	#N/A	#N/A	#N/A
80119	3	0.70134	-0.108819	-9.61153	0.345717	8.63543	0.733554	1.98149	-1.76813	#N/A	#N/A	#N/A	#N/A	#N/A	#N/A	#N/A	#N/A	#N/A	#N/A	#N/A	#N/A
80289	3	7.22266	-6.24262	-7.12123	-7.18023	7.59848	0.0950857	1.05301	1.68968	#N/A	#N/A	#N/A	#N/A	#N/A	#N/A	#N/A	#N/A	#N/A	#N/A	#N/A	#N/A
80352	3	6.88903	-5.94157	-6.71533	-6.77442	6.95253	0.733438	1.12557	1.11372	#N/A	#N/A	#N/A	#N/A	#N/A	#N/A	#N/A	#N/A	#N/A	#N/A	#N/A	#N/A
81185	3	0.230032	-9.88052	0.715815	0.287007	9.5592	1.37455	0.576102	-1.09574	#N/A	#N/A	#N/A	#N/A	#N/A	#N/A	#N/A	#N/A	#N/A	#N/A	#N/A	#N/A
82002	3	7.19243	-6.47881	-7.28601	-7.345	7.95364	0.950147	1.37374	0.639225	#N/A	#N/A	#N/A	#N/A	#N/A	#N/A	#N/A	#N/A	#N/A	#N/A	#N/A	#N/A
82160	3	6.94903	-5.96647	-6.85119	-6.91022	6.99734	0.510866	1.61413	0.79153	#N/A	#N/A	#N/A	#N/A	#N/A	#N/A	#N/A	#N/A	#N/A	#N/A	#N/A	#N/A
82193	3	0.407632	-7.47646	0.41746	0.117775	7.94612	0.977795	0.475789	0.493859	#N/A	#N/A	#N/A	#N/A	#N/A	#N/A	#N/A	#N/A	#N/A	#N/A	#N/A	#N/A
82280	3	1.23207	-8.81102	-0.846083	-0.0198309	8.5749	-8.12119	2.26591	0.004752	#N/A	#N/A	#N/A	#N/A	#N/A	#N/A	#N/A	#N/A	#N/A	#N/A	#N/A	#N/A
82343	3	8.61321	-7.55868	-8.16637	-8.22538	8.39224	0.367166	-0.625197	2.68603	#N/A	#N/A	#N/A	#N/A	#N/A	#N/A	#N/A	#N/A	#N/A	#N/A	#N/A	#N/A
82742	3	0.320611	-8.61432	-0.358366	0.786642	8.40623	0.562182	2.21434	-9.13775	#N/A	#N/A	#N/A	#N/A	#N/A	#N/A	#N/A	#N/A	#N/A	#N/A	#N/A	#N/A
84011	3	8.04655	-7.21876	-7.91628	-7.97526	8.38043	1.0217	0.953186	1.02066	#N/A	#N/A	#N/A	#N/A	#N/A	#N/A	#N/A	#N/A	#N/A	#N/A	#N/A	#N/A
84145	3	-9.78701	0.952184	1.82114	2.19705	20.9407	1.85993	-8.75181	-8.53472	#N/A	#N/A	#N/A	#N/A	#N/A	#N/A	#N/A	#N/A	#N/A	#N/A	#N/A	#N/A
84413	3	1.16173	-0.256819	-0.149402	-8.49249	-1.06138	-8.09155	0.810265	0.198442	#N/A	#N/A	#N/A	#N/A	#N/A	#N/A	#N/A	#N/A	#N/A	#N/A	#N/A	#N/A
84744	3	0.812115	0.260074	0.142238	-8.93482	-1.00357	0.179303	-9.01017	0.713478	#N/A	#N/A	#N/A	#N/A	#N/A	#N/A	#N/A	#N/A	#N/A	#N/A	#N/A	#N/A
84751	3	-0.219112	-7.41261	1.54776	0.506992	-0.969647	0.707657	-8.44512	0.170046	#N/A	#N/A	#N/A	#N/A	#N/A	#N/A	#N/A	#N/A	#N/A	#N/A	#N/A	#N/A
85085	3	0.260627	-8.22029	0.408412	0.498651	8.52359	0.817665	0.299441	0.594727	#N/A	#N/A	#N/A	#N/A	#N/A	#N/A	#N/A	#N/A	#N/A	#N/A	#N/A	#N/A
85109	3	0.573548	-7.99167	1.27806	-0.801044	-1.655	-0.377907	-9.11826	0.636479	#N/A	#N/A	#N/A	#N/A	#N/A	#N/A	#N/A	#N/A	#N/A	#N/A	#N/A	#N/A
85387	3	-0.182695	-8.40228	1.06454	0.254268	8.71637	0.431984	0.613569	0.323135	#N/A	#N/A	#N/A	#N/A	#N/A	#N/A	#N/A	#N/A	#N/A	#N/A	#N/A	#N/A
86646	3	1.20766	-9.29246	1.05564	-10.0242	9.00012	0.722908	-0.875504	1.99626	#N/A	#N/A	#N/A	#N/A	#N/A	#N/A	#N/A	#N/A	#N/A	#N/A	#N/A	#N/A
86975	3	0.40459	-7.95409	0.224723	0.389289	7.63497	1.49525	1.34346	-8.23648	#N/A	#N/A	#N/A	#N/A	#N/A	#N/A	#N/A	#N/A	#N/A	#N/A	#N/A	#N/A
87228	3	0.744329	-7.93613	0.0542172	0.00156527	8.12084	0.507052	0.923966	0.28423	#N/A	#N/A	#N/A	#N/A	#N/A	#N/A	#N/A	#N/A	#N/A	#N/A	#N/A	#N/A
87606	3	0.0783303	-8.52242	1.00339	0.736651	6.96515	8.77804	-8.63216	-8.14755	#N/A	#N/A	#N/A	#N/A	#N/A	#N/A	#N/A	#N/A	#N/A	#N/A	#N/A	#N/A
88712	3	7.7122	-6.63253	-7.65139	-7.71038	7.5401	0.0412405	2.29249	0.367219	#N/A	#N/A	#N/A	#N/A	#N/A	#N/A	#N/A	#N/A	#N/A	#N/A	#N/A	#N/A
89017	3	0.504048	-7.71449	0.598681	-0.151636	7.94611	0.977273	0.339554	0.493454	#N/A	#N/A	#N/A	#N/A	#N/A	#N/A	#N/A	#N/A	#N/A	#N/A	#N/A	#N/A
89208	3	0.329661	1.38779	-8.14242	-0.592021	-0.697261	-7.92268	1.08299	0.454718	#N/A	#N/A	#N/A	#N/A	#N/A	#N/A	#N/A	#N/A	#N/A	#N/A	#N/A	#N/A
89353	3	0.3276	-8.83036	0.202441	0.488268	9.2117	0.827861	0.668809	0.308563	#N/A	#N/A	#N/A	#N/A	#N/A	#N/A	#N/A	#N/A	#N/A	#N/A	#N/A	#N/A
89594	3	2.00231	-0.822074	-0.977214	-8.65736	-1.02043	1.23753	-8.862	-0.353548	#N/A	#N/A	#N/A	#N/A	#N/A	#N/A	#N/A	#N/A	#N/A	#N/A	#N/A	#N/A
89805	3	0.227509	0.469999	-9.10338	0.750177	7.91153	0.309337	0.37518	0.115452	#N/A	#N/A	#N/A	#N/A	#N/A	#N/A	#N/A	#N/A	#N/A	#N/A	#N/A	#N/A
89852	3	0.459739	-7.34937	0.0371665	0.594961	7.4123	1.4668	0.195795	0.045672	#N/A	#N/A	#N/A	#N/A	#N/A	#N/A	#N/A	#N/A	#N/A	#N/A	#N/A	#N/A
89916	3	7.77582	-6.68554	-7.185	-7.244	5.21776	7.03335	-5.54184	-5.17972	#N/A	#N/A	#N/A	#N/A	#N/A	#N/A	#N/A	#N/A	#N/A	#N/A	#N/A	#N/A
90179	3	0.578499	0.543096	0.00892841	-8.41286	7.37265	-0.156855	0.895918	0.544629	#N/A	#N/A	#N/A	#N/A	#N/A	#N/A	#N/A	#N/A	#N/A	#N/A	#N/A	#N/A
90532	3	2.01287	-7.54346	-0.0440478	-8.49107	8.17173	-0.0104171	1.06369	1.24915	#N/A	#N/A	#N/A	#N/A	#N/A	#N/A	#N/A	#N/A	#N/A	#N/A	#N/A	#N/A
90768	3	-7.17996	-20.6019	8.67804	-5.95697	21.3127	8.92362	-8.20489	-21.1686	#N/A	#N/A	#N/A	#N/A	#N/A	#N/A	#N/A	#N/A	#N/A	#N/A	#N/A	#N/A
90882	3	0.259181	-8.99791	-0.593269	1.35135	9.25297	1.40148	-0.673753	0.693615	#N/A	#N/A	#N/A	#N/A	#N/A	#N/A	#N/A	#N/A	#N/A	#N/A	#N/A	#N/A
91963	3	1.79154	-7.53878	0.312938	-8.32829	7.75767	0.866606	0.428199	1.065	#N/A	#N/A	#N/A	#N/A	#N/A	#N/A	#N/A	#N/A	#N/A	#N/A	#N/A	#N/A
92175	3	2.01287	-7.54346	-0.0440478	-8.49107	8.17173	-0.0104171	1.06369	1.24915	#N/A	#N/A	#N/A	#N/A	#N/A	#N/A	#N/A	#N/A	#N/A	#N/A	#N/A	#N/A
92253	3	0.140371	0.60946	-9.62982	0.821991	8.0103	-0.577722	0.999847	-0.041034	#N/A	#N/A	#N/A	#N/A	#N/A	#N/A	#N/A	#N/A	#N/A	#N/A	#N/A	#N/A
93338	3	1.84479	-8.89334	0.545976	-23.2913	22.4265	10.2753	-9.32454	-22.5083	#N/A	#N/A	#N/A	#N/A	#N/A	#N/A	#N/A	#N/A	#N/A	#N/A	#N/A	#N/A
94224	3	0.150534	-9.22546	0.478675	0.442727	9.67062	-0.280658	0.768502	0.835509	#N/A	#N/A	#N/A	#N/A	#N/A	#N/A	#N/A	#N/A	#N/A	#N/A	#N/A	#N/A
94398	3	0.208133	1.14031	-9.28688	0.163137	-1.08159	-8.97941	0.376486	0.507862	#N/A	#N/A	#N/A	#N/A	#N/A	#N/A	#N/A	#N/A	#N/A	#N/A	#N/A	#N/A
95049	3	0.0840719	-8.81996	1.07286	0.64875	-0.3313	0.850916	-9.98145	0.743923	#N/A	#N/A	#N/A	#N/A	#N/A	#N/A	#N/A	#N/A	#N/A	#N/A	#N/A	#N/A
95361	3	-0.283737	-8.42474	1.15527	0.383011	8.83903	1.41833	0.138044	0.138546	#N/A	#N/A	#N/A	#N/A	#N/A	#N/A	#N/A	#N/A	#N/A	#N/A	#N/A	#N/A
95805	3	1.7986	-7.66725	0.144469	-8.80508	-0.0611866	-8.28184	0.796128	1.22907	#N/A	#N/A	#N/A	#N/A	#N/A	#N/A	#N/A	#N/A	#N/A	#N/A	#N/A	#N/A
95920	3	0.132182	-9.56946	0.540565	0.584217	9.66307	0.96256	0.42317	0.122062	#N/A	#N/A	#N/A	#N/A	#N/A	#N/A	#N/A	#N/A	#N/A	#N/A	#N/A	#N/A
95973	3	0.132182	-9.56946	0.540565	0.584217	9.66307	0.96256	0.42317	0.122062	#N/A	#N/A	#N/A	#N/A	#N/A	#N/A	#N/A	#N/A	#N/A	#N/A	#N/A	#N/A
96199	3	0.466141	0.448741	-8.68774	0.44902	7.59457	0.079733	-0.0279447	0.773243	#N/A	#N/A	#N/A	#N/A	#N/A	#N/A	#N/A	#N/A	#N/A	#N/A	#N/A	#N/A
96513	3	9.07518	-7.77469	-8.48437	-8.54334	6.22241	-5.77243	-6.5459	8.12124	#N/A	#N/A	#N/A	#N/A	#N/A	#N/A	#N/A	#N/A	#N/A	#N/A	#N/A	#N/A
96766	3	0.983109	-9.03733	0.747714	-0.690589	21.3558	9.09735	-8.96049	-7.96953	#N/A	#N/A	#N/A	#N/A	#N/A	#N/A	#N/A	#N/A	#N/A	#N/A	#N/A	#N/A
97030	3	0.932826	0.191665	0.0116009	-8.94965	-0.908269	0.0662565	-9.08166	1.00738	#N/A	#N/A	#N/A	#N/A	#N/A	#N/A	#N/A	#N/A	#N/A	#N/A	#N/A	#N/A
97345	3	0.808178	-8.47815	1.58232	-22.7436	21.3851	9.59409	-9.10598	-21.8773	#N/A	#N/A	#N/A	#N/A	#N/A	#N/A	#N/A	#N/A	#N/A	#N/A	#N/A	#N/A
97504	3	0.977735	-0.522239	0.529042	-9.43214	-1.07152	0.797647	-9.66915	0.111218	#N/A	#N/A	#N/A	#N/A	#N/A	#N/A	#N/A	#N/A	#N/A	#N/A	#N/A	#N/A
97545	3	0.108253	-9.02153	0.435252	-0.261952	10.0988	0.471389	1.5923	-0.23949	#N/A	#N/A	#N/A	#N/A	#N/A	#N/A	#N/A	#N/A	#N/A	#N/A	#N/A	#N/A
98229	3	1.61456	-8.03038	-8.82065	0.40098	8.49231	0.641446	1.35772	0.385031	#N/A	#N/A	#N/A	#N/A	#N/A	#N/A	#N/A	#N/A	#N/A	#N/A	#N/A	#N/A
98287	3	0.595604	-8.99809	0.139784	0.29557	9.26975	0.740045	0.28619	0.776514	#N/A	#N/A	#N/A	#N/A	#N/A	#N/A	#N/A	#N/A	#N/A	#N/A	#N/A	#N/A
98908	3	0.716306	-9.27072	-2.30434	1.42923	9.59426	2.2741	-2.79111	0.678663	#N/A	#N/A	#N/A	#N/A	#N/A	#N/A	#N/A	#N/A	#N/A	#N/A	#N/A	#N/A
99765	3	1.1933	-7.83208	-0.460639	-0.202583	7.80457	0.775373	1.19895	-0.258258	#N/A	#N/A	#N/A	#N/A	#N/A	#N/A	#N/A	#N/A	#N/A	#N/A	#N/A	#N/A
99833	3	0.519739	-8.72554	0.425994	0.63624	21.3928	9.34533	-8.7256	-8.44683	#N/A	#N/A	#N/A	#N/A	#N/A	#N/A	#N/A	#N/A	#N/A	#N/A	#N/A	#N/A
99997	3	7.9894	-6.68948	-7.77846	-7.83744	6.38668	-5.93501	8.17814	-6.34799	#N/A	#N/A	#N/A	#N/A	#N/A	#N/A	#N/A	#N/A	#N/A	#N/A	#N/A	#N/A
100591	3	0.703375	-22.5157	1.68698	-21.8323	23.0878	10.8457	-9.61671	-22.9627	#N/A	#N/A	#N/A	#N/A	#N/A	#N/A	#N/A	#N/A	#N/A	#N/A	#N/A	#N/A
101463	3	0.259181	-8.99791	-0.593269	1.35135	9.25297	1.40148	-0.673753	0.693615	#N/A	#N/A	#N/A	#N/A	#N/A	#N/A	#N/A	#N/A	#N/A	#N/A	#N/A	#N/A
101989	3	8.75987	-7.76116	-8.58366	-8.64263	8.58168	0.692248	1.48554	0.776631	#N/A	#N/A	#N/A	#N/A	#N/A	#N/A	#N/A	#N/A	#N/A	#N/A	#N/A	#N/A
102740	3	-0.263212	-8.62076	0.680388	1.16437	7.97718	2.7684	0.10434	-8.90694	#N/A	#N/A	#N/A	#N/A	#N/A	#N/A	#N/A	#N/A	#N/A	#N/A	#N/A	#N/A
103916	3	0.808412	-7.74389	0.0785545	-0.0805549	7.84781	0.809616	0.781495	0.153012	#N/A	#N/A	#N/A	#N/A	#N/A	#N/A	#N/A	#N/A	#N/A	#N/A	#N/A	#N/A
103928	3	8.33591	-7.03553	-8.01235	-8.07133	6.16975	-5.71902	7.94954	-6.13132	#N/A	#N/A	#N/A	#N/A	#N/A	#N/A	#N/A	#N/A	#N/A	#N/A	#N/A	#N/A
104953	3	0.987645	-7.80096	0.0940301	-0.279207	7.79138	0.932377	0.366253	0.533558	#N/A	#N/A	#N/A	#N/A	#N/A	#N/A	#N/A	#N/A	#N/A	#N/A	#N/A	#N/A
105261	3	0.589626	-8.53539	0.289474	0.0866588	8.60296	1.46691	0.651877	-0.5006	#N/A	#N/A	#N/A	#N/A	#N/A	#N/A	#N/A	#N/A	#N/A	#N/A	#N/A	#N/A
106560	3	0.833178	-9.03347	0.0796625	-0.0735196	8.93146	1.27127	0.912701	-0.728456	#N/A	#N/A	#N/A	#N/A	#N/A	#N/A	#N/A	#N/A	#N/A	#N/A	#N/A	#N/A
106613	3	8.0887	-7.19205	-8.22463	-8.2836	8.82384	0.114794	1.60233	1.13787	#N/A	#N/A	#N/A	#N/A	#N/A	#N/A	#N/A	#N/A	#N/A	#N/A	#N/A	#N/A
107727	3	0.881147	-9.68025	-0.0616923	-0.0155176	9.62849	0.569075	1.01937	-0.014103	#N/A	#N/A	#N/A	#N/A	#N/A	#N/A	#N/A	#N/A	#N/A	#N/A	#N/A	#N/A
107817	3	0.158667	-7.80298	0.0864009	0.812359	8.02364	1.55465	0.699659	-0.657284	#N/A	#N/A	#N/A	#N/A	#N/A	#N/A	#N/A	#N/A	#N/A	#N/A	#N/A	#N/A
108062	3	0.108253	-9.02153	0.435252	-0.261952	10.0988	0.471389	1.5923	-0.23949	#N/A	#N/A	#N/A	#N/A	#N/A	#N/A	#N/A	#N/A	#N/A	#N/A	#N/A	#N/A
108594	3	0.787979	0.16439	0.00299527	-7.89642	7.28399	0.515293	0.257838	1.08997	#N/A	#N/A	#N/A	#N/A	#N/A	#N/A	#N/A	#N/A	#N/A	#N/A	#N/A	#N/A
108756	3	1.09614	-0.582602	-8.40108	0.213988	7.64364	0.343715	1.02645	0.486274	#N/A	#N/A	#N/A	#N/A	#N/A	#N/A	#N/A	#N/A	#N/A	#N/A	#N/A	#N/A
109064	3	0.753798	0.059494	0.19521	-8.1261	7.28049	-0.0246597	0.786476	0.833186	#N/A	#N/A	#N/A	#N/A	#N/A	#N/A	#N/A	#N/A	#N/A	#N/A	#N/A	#N/A
109543	3	0.961956	-7.8579	-0.151577	0.430878	-0.747553	0.832449	-9.09147	0.601041	#N/A	#N/A	#N/A	#N/A	#N/A	#N/A	#N/A	#N/A	#N/A	#N/A	#N/A	#N/A
109933	3	0.650412	-0.658406	0.747763	-9.58427	9.06938	0.631067	0.217964	1.07069	#N/A	#N/A	#N/A	#N/A	#N/A	#N/A	#N/A	#N/A	#N/A	#N/A	#N/A	#N/A
110268	3	0.179092	-9.19736	0.375581	0.479555	9.332	1.73653	1.02614	-2.10859	#N/A	#N/A	#N/A	#N/A	#N/A	#N/A	#N/A	#N/A	#N/A	#N/A	#N/A	#N/A
110552	3	0.0319261	0.7635	-8.18357	0.799794	-0.494851	-7.60497	0.975776	0.256566	#N/A	#N/A	#N/A	#N/A	#N/A	#N/A	#N/A	#N/A	#N/A	#N/A	#N/A	#N/A
111143	3	1.12703	-7.40285	0.502566	-8.56548	8.3832	-0.197621	1.79168	0.122677	#N/A	#N/A	#N/A	#N/A	#N/A	#N/A	#N/A	#N/A	#N/A	#N/A	#N/A	#N/A
111416	3	0.657235	0.308402	-0.0539421	-8.71234	-0.694203	0.221851	0.683749	-8.29779	#N/A	#N/A	#N/A	#N/A	#N/A	#N/A	#N/A	#N/A	#N/A	#N/A	#N/A	#N/A
112523	3	8.33591	-7.03553	-8.01235	-8.07133	6.16975	-5.71902	7.94954	-6.13132	#N/A	#N/A	#N/A	#N/A	#N/A	#N/A	#N/A	#N/A	#N/A	#N/A	#N/A	#N/A
112601	3	8.33591	-7.03553	-8.01235	-8.07133	6.16975	-5.71902	7.94954	-6.13132	#N/A	#N/A	#N/A	#N/A	#N/A	#N/A	#N/A	#N/A	#N/A	#N/A	#N/A	#N/A
113560	3	8.79135	-7.64253	-8.70058	-8.75955	8.56556	-0.58552	2.18993	0.935588	#N/A	#N/A	#N/A	#N/A	#N/A	#N/A	#N/A	#N/A	#N/A	#N/A	#N/A	#N/A
114032	3	-0.0267978	0.595025	-8.81977	0.952608	8.12576	0.586339	-0.846202	0.737981	#N/A	#N/A	#N/A	#N/A	#N/A	#N/A	#N/A	#N/A	#N/A	#N/A	#N/A	#N/A
114289	3	1.30631	-8.44767	-9.11854	0.736832	9.07867	1.01022	0.682404	0.67509	#N/A	#N/A	#N/A	#N/A	#N/A	#N/A	#N/A	#N/A	#N/A	#N/A	#N/A	#N/A
114369	3	0.260627	-8.22029	0.408412	0.498651	8.52359	0.817665	0.299441	0.594727	#N/A	#N/A	#N/A	#N/A	#N/A	#N/A	#N/A	#N/A	#N/A	#N/A	#N/A	#N/A
114682	3	0.573799	-8.92837	0.216224	0.199983	0.372495	-8.36164	1.10557	-0.154131	#N/A	#N/A	#N/A	#N/A	#N/A	#N/A	#N/A	#N/A	#N/A	#N/A	#N/A	#N/A
114804	3	1.03222	-1.14162	0.770674	-8.83451	-1.23487	0.797443	-9.37694	0.170661	#N/A	#N/A	#N/A	#N/A	#N/A	#N/A	#N/A	#N/A	#N/A	#N/A	#N/A	#N/A
114827	3	0.621002	-0.0143269	0.627684	-11.0712	-1.64329	1.13117	-11.2194	-24.225	#N/A	#N/A	#N/A	#N/A	#N/A	#N/A	#N/A	#N/A	#N/A	#N/A	#N/A	#N/A
116641	3	0.22077	-8.66111	0.249495	0.647894	8.44393	1.98841	1.07166	-9.05839	#N/A	#N/A	#N/A	#N/A	#N/A	#N/A	#N/A	#N/A	#N/A	#N/A	#N/A	#N/A
117293	3	7.19243	-6.47881	-7.28601	-7.345	7.95364	0.950147	1.37374	0.639225	#N/A	#N/A	#N/A	#N/A	#N/A	#N/A	#N/A	#N/A	#N/A	#N/A	#N/A	#N/A
118247	3	0.731614	-7.84204	0.808149	-8.78118	8.82437	1.25766	1.5012	-1.45897	#N/A	#N/A	#N/A	#N/A	#N/A	#N/A	#N/A	#N/A	#N/A	#N/A	#N/A	#N/A
118385	3	-0.0412804	-8.46363	0.631821	0.613764	8.31092	1.90146	0.998891	-8.89785	#N/A	#N/A	#N/A	#N/A	#N/A	#N/A	#N/A	#N/A	#N/A	#N/A	#N/A	#N/A
118529	3	7.20727	-5.90748	-7.03049	-7.08951	5.75174	-5.30369	7.54538	-5.71376	#N/A	#N/A	#N/A	#N/A	#N/A	#N/A	#N/A	#N/A	#N/A	#N/A	#N/A	#N/A
118689	3	0.135147	-8.33452	-0.0895371	0.938423	8.1098	1.48687	1.54082	-8.84866	#N/A	#N/A	#N/A	#N/A	#N/A	#N/A	#N/A	#N/A	#N/A	#N/A	#N/A	#N/A
118781	3	0.140743	0.684931	-11.2512	0.361633	10.6579	0.821359	0.975144	-0.446591	#N/A	#N/A	#N/A	#N/A	#N/A	#N/A	#N/A	#N/A	#N/A	#N/A	#N/A	#N/A
119048	3	0.32185	0.152487	0.693081	-9.485	8.93584	-1.22328	0.723323	1.74451	#N/A	#N/A	#N/A	#N/A	#N/A	#N/A	#N/A	#N/A	#N/A	#N/A	#N/A	#N/A
119545	3	7.74695	-6.44677	-7.60392	-7.6629	6.41734	-5.96517	8.21085	-6.37853	#N/A	#N/A	#N/A	#N/A	#N/A	#N/A	#N/A	#N/A	#N/A	#N/A	#N/A	#N/A
119907	3	0.00185658	0.282903	0.842185	-9.05838	-0.480397	-8.74249	1.06369	0.168251	#N/A	#N/A	#N/A	#N/A	#N/A	#N/A	#N/A	#N/A	#N/A	#N/A	#N/A	#N/A
120049	3	-1.13144	0.376609	-8.94614	2.08442	8.54987	0.581069	0.677582	-0.082026	#N/A	#N/A	#N/A	#N/A	#N/A	#N/A	#N/A	#N/A	#N/A	#N/A	#N/A	#N/A
120082	3	0.797708	-0.498311	0.259673	-8.73593	8.41721	0.883784	1.02392	-0.055347	#N/A	#N/A	#N/A	#N/A	#N/A	#N/A	#N/A	#N/A	#N/A	#N/A	#N/A	#N/A
120882	3	7.50042	-6.20063	-6.91046	-6.96946	5.3419	-4.89534	-5.66828	7.23938	#N/A	#N/A	#N/A	#N/A	#N/A	#N/A	#N/A	#N/A	#N/A	#N/A	#N/A	#N/A
121167	3	9.07518	-7.77469	-8.48437	-8.54334	6.22241	-5.77243	-6.5459	8.12124	#N/A	#N/A	#N/A	#N/A	#N/A	#N/A	#N/A	#N/A	#N/A	#N/A	#N/A	#N/A
121205	3	-0.0622512	0.917117	-8.44871	0.774522	-0.696677	-7.92236	1.083	0.007866	#N/A	#N/A	#N/A	#N/A	#N/A	#N/A	#N/A	#N/A	#N/A	#N/A	#N/A	#N/A
121512	3	0.566402	0.343087	0.0888302	-9.84393	0.0596941	0.302158	0.956853	-9.12519	#N/A	#N/A	#N/A	#N/A	#N/A	#N/A	#N/A	#N/A	#N/A	#N/A	#N/A	#N/A
121696	3	0.634037	-8.31675	-0.420517	0.769034	8.85867	1.066	-0.572236	1.21964	#N/A	#N/A	#N/A	#N/A	#N/A	#N/A	#N/A	#N/A	#N/A	#N/A	#N/A	#N/A
121758	3	0.132182	-9.56946	0.540565	0.584217	9.66307	0.96256	0.42317	0.122062	#N/A	#N/A	#N/A	#N/A	#N/A	#N/A	#N/A	#N/A	#N/A	#N/A	#N/A	#N/A
121943	3	7.85	-6.54686	-7.54943	-7.60844	5.8272	-5.37755	7.61707	-5.78909	#N/A	#N/A	#N/A	#N/A	#N/A	#N/A	#N/A	#N/A	#N/A	#N/A	#N/A	#N/A
122387	3	0.0242221	0.545528	-8.83764	0.712652	8.39087	0.0731507	1.21152	0.349504	#N/A	#N/A	#N/A	#N/A	#N/A	#N/A	#N/A	#N/A	#N/A	#N/A	#N/A	#N/A
123701	3	-0.219112	-7.41261	1.54776	0.506992	-0.969647	0.707657	-8.44512	0.170046	#N/A	#N/A	#N/A	#N/A	#N/A	#N/A	#N/A	#N/A	#N/A	#N/A	#N/A	#N/A
123804	3	0.553496	-7.50425	0.295138	0.0754717	7.89399	1.0744	0.409998	0.477309	#N/A	#N/A	#N/A	#N/A	#N/A	#N/A	#N/A	#N/A	#N/A	#N/A	#N/A	#N/A
124510	3	0.179092	-9.19736	0.375581	0.479555	9.332	1.73653	1.02614	-2.10859	#N/A	#N/A	#N/A	#N/A	#N/A	#N/A	#N/A	#N/A	#N/A	#N/A	#N/A	#N/A
125129	3	0.566246	0.343104	0.0888472	-9.84461	0.0596701	0.302147	0.95682	-9.12519	#N/A	#N/A	#N/A	#N/A	#N/A	#N/A	#N/A	#N/A	#N/A	#N/A	#N/A	#N/A
125694	3	0.983109	-9.03733	0.747714	-0.690589	21.3558	9.09735	-8.96049	-7.96953	#N/A	#N/A	#N/A	#N/A	#N/A	#N/A	#N/A	#N/A	#N/A	#N/A	#N/A	#N/A
126371	3	7.32066	-6.28211	-7.3448	-7.40379	7.67897	-0.277684	1.74769	1.2407	#N/A	#N/A	#N/A	#N/A	#N/A	#N/A	#N/A	#N/A	#N/A	#N/A	#N/A	#N/A
126464	3	0.731056	-7.84197	1.38877	-8.33764	8.05872	2.75159	-0.495706	-0.61163	#N/A	#N/A	#N/A	#N/A	#N/A	#N/A	#N/A	#N/A	#N/A	#N/A	#N/A	#N/A
126479	3	0.453553	0.270685	-8.81649	0.6357	7.22369	0.862504	0.15283	-0.834366	#N/A	#N/A	#N/A	#N/A	#N/A	#N/A	#N/A	#N/A	#N/A	#N/A	#N/A	#N/A
126575	3	0.140743	0.684931	-11.2512	0.361633	10.6579	0.821359	0.975144	-0.446591	#N/A	#N/A	#N/A	#N/A	#N/A	#N/A	#N/A	#N/A	#N/A	#N/A	#N/A	#N/A
126610	3	0.140744	0.684931	-11.2511	0.361632	10.8545	0.63042	0.691013	0.301192	#N/A	#N/A	#N/A	#N/A	#N/A	#N/A	#N/A	#N/A	#N/A	#N/A	#N/A	#N/A
126978	3	0.140744	0.684931	-11.2511	0.361632	10.8545	0.63042	0.691013	0.301192	#N/A	#N/A	#N/A	#N/A	#N/A	#N/A	#N/A	#N/A	#N/A	#N/A	#N/A	#N/A
127270	3	0.942279	0.149686	-0.418455	-9.12239	8.64835	0.0768023	1.4224	0.394254	#N/A	#N/A	#N/A	#N/A	#N/A	#N/A	#N/A	#N/A	#N/A	#N/A	#N/A	#N/A
127555	3	-0.295352	1.22698	0.710203	-10.002	-0.806607	-9.14852	1.24462	-8.74685	#N/A	#N/A	#N/A	#N/A	#N/A	#N/A	#N/A	#N/A	#N/A	#N/A	#N/A	#N/A
127683	3	0.335358	0.369894	-9.09807	0.607321	8.32784	0.400758	0.313808	0.553424	#N/A	#N/A	#N/A	#N/A	#N/A	#N/A	#N/A	#N/A	#N/A	#N/A	#N/A	#N/A
127893	3	7.19243	-6.47881	-7.28601	-7.345	7.95364	0.950147	1.37374	0.639225	#N/A	#N/A	#N/A	#N/A	#N/A	#N/A	#N/A	#N/A	#N/A	#N/A	#N/A	#N/A
127930	3	-0.38514	-6.60261	2.77024	-21.3422	-0.735891	0.31981	-8.8093	1.4523	#N/A	#N/A	#N/A	#N/A	#N/A	#N/A	#N/A	#N/A	#N/A	#N/A	#N/A	#N/A
128503	3	0.589863	0.120441	-8.52505	0.440438	7.71243	0.376522	0.74961	0.389702	#N/A	#N/A	#N/A	#N/A	#N/A	#N/A	#N/A	#N/A	#N/A	#N/A	#N/A	#N/A
128591	3	0.552894	-8.67749	-0.454327	1.02248	7.77807	3.59687	-0.271778	-8.75038	#N/A	#N/A	#N/A	#N/A	#N/A	#N/A	#N/A	#N/A	#N/A	#N/A	#N/A	#N/A
128833	3	7.74695	-6.44677	-7.60392	-7.6629	6.41734	-5.96517	8.21085	-6.37853	#N/A	#N/A	#N/A	#N/A	#N/A	#N/A	#N/A	#N/A	#N/A	#N/A	#N/A	#N/A
128943	3	-0.225451	-8.65245	0.737099	0.579978	8.8274	0.910916	1.21539	-1.4048	#N/A	#N/A	#N/A	#N/A	#N/A	#N/A	#N/A	#N/A	#N/A	#N/A	#N/A	#N/A
128989	3	0.335201	0.320939	0.389736	-9.37679	9.02145	1.0406	0.0500928	0.616641	#N/A	#N/A	#N/A	#N/A	#N/A	#N/A	#N/A	#N/A	#N/A	#N/A	#N/A	#N/A
129446	3	1.77536	-8.11397	-9.14102	0.228442	0.160725	-8.35517	1.45564	0.63194	#N/A	#N/A	#N/A	#N/A	#N/A	#N/A	#N/A	#N/A	#N/A	#N/A	#N/A	#N/A
129798	3	0.0242221	0.545528	-8.83764	0.712652	8.39087	0.0731507	1.21152	0.349504	#N/A	#N/A	#N/A	#N/A	#N/A	#N/A	#N/A	#N/A	#N/A	#N/A	#N/A	#N/A
129869	3	1.03339	-8.18029	0.150502	-0.56411	8.32006	-0.0538772	0.778475	0.897213	#N/A	#N/A	#N/A	#N/A	#N/A	#N/A	#N/A	#N/A	#N/A	#N/A	#N/A	#N/A
129920	3	0.504048	-7.71449	0.598681	-0.151636	7.94611	0.977273	0.339554	0.493454	#N/A	#N/A	#N/A	#N/A	#N/A	#N/A	#N/A	#N/A	#N/A	#N/A	#N/A	#N/A
130552	3	-0.283737	-8.42474	1.15527	0.383011	8.83903	1.41833	0.138044	0.138546	#N/A	#N/A	#N/A	#N/A	#N/A	#N/A	#N/A	#N/A	#N/A	#N/A	#N/A	#N/A
131679	3	0.690378	-8.46385	0.795842	-0.471404	7.77275	0.864092	-0.259045	0.457612	#N/A	#N/A	#N/A	#N/A	#N/A	#N/A	#N/A	#N/A	#N/A	#N/A	#N/A	#N/A
131716	3	-6.56659	-5.13534	1.52405	1.52059	6.96479	0.433228	0.720321	0.778184	#N/A	#N/A	#N/A	#N/A	#N/A	#N/A	#N/A	#N/A	#N/A	#N/A	#N/A	#N/A
131986	3	7.71003	-6.64476	-7.4349	-7.4939	7.39261	0.354956	1.00956	1.54067	#N/A	#N/A	#N/A	#N/A	#N/A	#N/A	#N/A	#N/A	#N/A	#N/A	#N/A	#N/A
132101	3	0.22002	-8.63784	0.601772	0.916436	-0.734079	1.06569	-9.98424	0.305532	#N/A	#N/A	#N/A	#N/A	#N/A	#N/A	#N/A	#N/A	#N/A	#N/A	#N/A	#N/A
132477	3	7.55621	-6.95683	-7.72179	-7.78079	8.58377	1.03522	1.24332	0.699196	#N/A	#N/A	#N/A	#N/A	#N/A	#N/A	#N/A	#N/A	#N/A	#N/A	#N/A	#N/A
132598	3	0.22377	0.64838	-9.63371	0.693666	7.93731	-0.267399	0.221844	0.144038	#N/A	#N/A	#N/A	#N/A	#N/A	#N/A	#N/A	#N/A	#N/A	#N/A	#N/A	#N/A
132758	3	1.1757	-8.12409	0.135625	-1.23149	8.75715	0.457501	0.966663	0.754389	#N/A	#N/A	#N/A	#N/A	#N/A	#N/A	#N/A	#N/A	#N/A	#N/A	#N/A	#N/A
133267	3	0.43692	-8.16706	0.338837	0.237067	7.99668	2.08618	0.984918	-8.47797	#N/A	#N/A	#N/A	#N/A	#N/A	#N/A	#N/A	#N/A	#N/A	#N/A	#N/A	#N/A
133522	3	0.22077	-8.66111	0.249495	0.647894	8.44393	1.98841	1.07166	-9.05839	#N/A	#N/A	#N/A	#N/A	#N/A	#N/A	#N/A	#N/A	#N/A	#N/A	#N/A	#N/A
133793	3	7.89343	-6.96775	-7.91792	-7.97689	8.5079	0.110433	1.29753	1.45192	#N/A	#N/A	#N/A	#N/A	#N/A	#N/A	#N/A	#N/A	#N/A	#N/A	#N/A	#N/A
133996	3	0.0904573	-7.38362	0.174726	0.889813	7.44092	0.539458	0.779855	-0.025787	#N/A	#N/A	#N/A	#N/A	#N/A	#N/A	#N/A	#N/A	#N/A	#N/A	#N/A	#N/A
134862	3	0.150534	-9.22546	0.478675	0.442727	9.67062	-0.280658	0.768502	0.835509	#N/A	#N/A	#N/A	#N/A	#N/A	#N/A	#N/A	#N/A	#N/A	#N/A	#N/A	#N/A
135130	3	1.16115	-8.28909	-0.872448	0.594717	7.0212	8.83711	-7.82524	-7.96278	#N/A	#N/A	#N/A	#N/A	#N/A	#N/A	#N/A	#N/A	#N/A	#N/A	#N/A	#N/A
136666	3	1.79154	-7.53878	0.312938	-8.32829	7.75767	0.866606	0.428199	1.065	#N/A	#N/A	#N/A	#N/A	#N/A	#N/A	#N/A	#N/A	#N/A	#N/A	#N/A	#N/A
136707	3	0.814904	-7.68575	0.223268	-0.154765	7.65019	1.14169	0.50215	0.08391	#N/A	#N/A	#N/A	#N/A	#N/A	#N/A	#N/A	#N/A	#N/A	#N/A	#N/A	#N/A
136728	3	0.987645	-7.80096	0.0940301	-0.279207	7.79138	0.932377	0.366253	0.533558	#N/A	#N/A	#N/A	#N/A	#N/A	#N/A	#N/A	#N/A	#N/A	#N/A	#N/A	#N/A
136866	3	0.227509	0.469999	-9.10338	0.750177	7.91153	0.309337	0.37518	0.115452	#N/A	#N/A	#N/A	#N/A	#N/A	#N/A	#N/A	#N/A	#N/A	#N/A	#N/A	#N/A
137330	3	0.758624	-8.68779	0.480483	0.189539	21.4363	9.34485	-8.7256	-8.2585	#N/A	#N/A	#N/A	#N/A	#N/A	#N/A	#N/A	#N/A	#N/A	#N/A	#N/A	#N/A
137575	3	1.11353	0.0272425	-8.77262	-0.193645	6.77823	-7.09017	8.56413	-7.52875	#N/A	#N/A	#N/A	#N/A	#N/A	#N/A	#N/A	#N/A	#N/A	#N/A	#N/A	#N/A
137642	3	0.00185658	0.282903	0.842185	-9.05838	-0.480397	-8.74249	1.06369	0.168251	#N/A	#N/A	#N/A	#N/A	#N/A	#N/A	#N/A	#N/A	#N/A	#N/A	#N/A	#N/A
137665	3	1.18707	-8.58573	0.220592	-1.49604	-0.280219	-8.93867	1.08909	0.352656	#N/A	#N/A	#N/A	#N/A	#N/A	#N/A	#N/A	#N/A	#N/A	#N/A	#N/A	#N/A
139556	3	0.259903	-8.25422	0.425036	0.357662	8.58183	1.25556	0.6649	-0.169284	#N/A	#N/A	#N/A	#N/A	#N/A	#N/A	#N/A	#N/A	#N/A	#N/A	#N/A	#N/A
139839	3	1.15951	-8.74261	0.213484	-1.02141	9.453	0.946933	0.155216	1.22495	#N/A	#N/A	#N/A	#N/A	#N/A	#N/A	#N/A	#N/A	#N/A	#N/A	#N/A	#N/A
139960	3	1.0842	-9.72275	-0.411236	-0.205643	10.3368	0.963832	0.87546	0.433425	#N/A	#N/A	#N/A	#N/A	#N/A	#N/A	#N/A	#N/A	#N/A	#N/A	#N/A	#N/A
139992	3	-7.17996	-20.6019	8.67804	-5.95697	21.3127	8.92362	-8.20489	-21.1686	#N/A	#N/A	#N/A	#N/A	#N/A	#N/A	#N/A	#N/A	#N/A	#N/A	#N/A	#N/A
140243	3	8.21209	-7.06513	-7.8033	-7.8623	6.95343	0.732441	1.12566	1.11361	#N/A	#N/A	#N/A	#N/A	#N/A	#N/A	#N/A	#N/A	#N/A	#N/A	#N/A	#N/A
140550	3	2.01855	-8.91046	-1.52993	-0.813119	9.13712	1.04575	1.81955	-0.96051	#N/A	#N/A	#N/A	#N/A	#N/A	#N/A	#N/A	#N/A	#N/A	#N/A	#N/A	#N/A
140903	3	-0.00871148	-8.43155	0.585194	0.570184	8.86992	0.505719	0.592474	0.51651	#N/A	#N/A	#N/A	#N/A	#N/A	#N/A	#N/A	#N/A	#N/A	#N/A	#N/A	#N/A
142377	3	1.18034	-1.06494	0.546454	-8.93004	-0.929037	0.874754	-9.37897	0.443852	#N/A	#N/A	#N/A	#N/A	#N/A	#N/A	#N/A	#N/A	#N/A	#N/A	#N/A	#N/A
142507	3	1.09927	-7.93831	0.667486	-8.838	8.57603	1.26407	1.40008	-1.39834	#N/A	#N/A	#N/A	#N/A	#N/A	#N/A	#N/A	#N/A	#N/A	#N/A	#N/A	#N/A
142709	3	0.703375	-22.5157	1.68698	-21.8323	23.0878	10.8457	-9.61671	-22.9627	#N/A	#N/A	#N/A	#N/A	#N/A	#N/A	#N/A	#N/A	#N/A	#N/A	#N/A	#N/A
142787	3	7.83492	-6.83237	-7.65053	-7.70951	7.82515	0.443959	1.1692	1.32701	#N/A	#N/A	#N/A	#N/A	#N/A	#N/A	#N/A	#N/A	#N/A	#N/A	#N/A	#N/A
143584	3	7.8885	-6.58846	-7.68668	-7.74566	6.32576	-5.87454	8.11395	-6.28714	#N/A	#N/A	#N/A	#N/A	#N/A	#N/A	#N/A	#N/A	#N/A	#N/A	#N/A	#N/A
144306	3	1.20766	-9.29246	1.05564	-10.0242	9.00012	0.722908	-0.875504	1.99626	#N/A	#N/A	#N/A	#N/A	#N/A	#N/A	#N/A	#N/A	#N/A	#N/A	#N/A	#N/A
145835	3	0.808412	-7.74389	0.0785545	-0.0805549	7.84781	0.809616	0.781495	0.153012	#N/A	#N/A	#N/A	#N/A	#N/A	#N/A	#N/A	#N/A	#N/A	#N/A	#N/A	#N/A
146363	3	1.03308	-8.18075	0.150437	-0.564214	8.32298	-0.0539329	0.778384	0.897052	#N/A	#N/A	#N/A	#N/A	#N/A	#N/A	#N/A	#N/A	#N/A	#N/A	#N/A	#N/A
146926	3	0.181475	-8.14248	0.498146	0.278981	8.68788	0.256511	0.858873	0.548258	#N/A	#N/A	#N/A	#N/A	#N/A	#N/A	#N/A	#N/A	#N/A	#N/A	#N/A	#N/A
146929	3	1.43396	-8.44681	0.338711	-2.19411	8.45451	0.678317	0.738388	0.543183	#N/A	#N/A	#N/A	#N/A	#N/A	#N/A	#N/A	#N/A	#N/A	#N/A	#N/A	#N/A
147144	3	0.70134	-0.108819	-9.61153	0.345717	8.63543	0.733554	1.98149	-1.76813	#N/A	#N/A	#N/A	#N/A	#N/A	#N/A	#N/A	#N/A	#N/A	#N/A	#N/A	#N/A
148524	3	7.8885	-6.58846	-7.68668	-7.74566	6.32576	-5.87454	8.11395	-6.28714	#N/A	#N/A	#N/A	#N/A	#N/A	#N/A	#N/A	#N/A	#N/A	#N/A	#N/A	#N/A
150024	3	0.621002	-0.0143269	0.627684	-11.0712	-1.64329	1.13117	-11.2194	-24.225	#N/A	#N/A	#N/A	#N/A	#N/A	#N/A	#N/A	#N/A	#N/A	#N/A	#N/A	#N/A
150693	3	-0.822222	1.23522	1.2607	-9.43495	-0.718207	-9.33072	0.275157	0.878115	#N/A	#N/A	#N/A	#N/A	#N/A	#N/A	#N/A	#N/A	#N/A	#N/A	#N/A	#N/A
150823	3	0.271767	-8.38111	0.520134	0.0819797	8.98804	-0.279641	0.907061	0.874983	#N/A	#N/A	#N/A	#N/A	#N/A	#N/A	#N/A	#N/A	#N/A	#N/A	#N/A	#N/A
150941	3	0.977735	-0.522239	0.529042	-9.43214	-1.07152	0.797647	-9.66915	0.111218	#N/A	#N/A	#N/A	#N/A	#N/A	#N/A	#N/A	#N/A	#N/A	#N/A	#N/A	#N/A
151281	3	-0.396655	-7.87473	0.187643	1.45642	7.42077	1.63181	1.20309	-8.43572	#N/A	#N/A	#N/A	#N/A	#N/A	#N/A	#N/A	#N/A	#N/A	#N/A	#N/A	#N/A
151505	3	-0.396655	-7.87473	0.187643	1.45642	7.42077	1.63181	1.20309	-8.43572	#N/A	#N/A	#N/A	#N/A	#N/A	#N/A	#N/A	#N/A	#N/A	#N/A	#N/A	#N/A
151649	3	0.351365	-8.28492	0.579934	0.204734	8.16768	1.84988	0.488053	-1.23365	#N/A	#N/A	#N/A	#N/A	#N/A	#N/A	#N/A	#N/A	#N/A	#N/A	#N/A	#N/A
152982	3	7.77582	-6.68554	-7.185	-7.244	5.21776	7.03335	-5.54184	-5.17972	#N/A	#N/A	#N/A	#N/A	#N/A	#N/A	#N/A	#N/A	#N/A	#N/A	#N/A	#N/A
153141	3	-0.403823	0.589017	1.30525	-8.66435	0.577424	-8.05471	0.592812	1.25073	#N/A	#N/A	#N/A	#N/A	#N/A	#N/A	#N/A	#N/A	#N/A	#N/A	#N/A	#N/A
153674	3	0.43692	-8.16706	0.338837	0.237067	7.99668	2.08618	0.984918	-8.47797	#N/A	#N/A	#N/A	#N/A	#N/A	#N/A	#N/A	#N/A	#N/A	#N/A	#N/A	#N/A
154313	3	0.78393	-8.55764	-1.20083	0.510577	8.85058	-0.13839	2.44249	-1.15262	#N/A	#N/A	#N/A	#N/A	#N/A	#N/A	#N/A	#N/A	#N/A	#N/A	#N/A	#N/A
154479	3	0.32185	0.152487	0.693081	-9.485	8.93584	-1.22328	0.723323	1.74451	#N/A	#N/A	#N/A	#N/A	#N/A	#N/A	#N/A	#N/A	#N/A	#N/A	#N/A	#N/A
154531	3	8.56092	-7.54659	-8.35996	-8.41896	8.21724	0.84747	1.62778	0.437322	#N/A	#N/A	#N/A	#N/A	#N/A	#N/A	#N/A	#N/A	#N/A	#N/A	#N/A	#N/A
154558	3	-0.392798	1.11438	-9.12294	1.0258	7.9652	-0.591157	0.4599	0.500276	#N/A	#N/A	#N/A	#N/A	#N/A	#N/A	#N/A	#N/A	#N/A	#N/A	#N/A	#N/A
154603	3	-0.182695	-8.40228	1.06454	0.254268	8.71637	0.431984	0.613569	0.323135	#N/A	#N/A	#N/A	#N/A	#N/A	#N/A	#N/A	#N/A	#N/A	#N/A	#N/A	#N/A
154646	3	-0.0412804	-8.46363	0.631821	0.613764	8.31092	1.90146	0.998891	-8.89785	#N/A	#N/A	#N/A	#N/A	#N/A	#N/A	#N/A	#N/A	#N/A	#N/A	#N/A	#N/A
155582	3	0.50064	0.402806	-8.51832	0.696235	21.0781	-7.43513	-21.3389	2.31307	#N/A	#N/A	#N/A	#N/A	#N/A	#N/A	#N/A	#N/A	#N/A	#N/A	#N/A	#N/A
155848	3	0.566402	0.343087	0.0888302	-9.84393	0.0596941	0.302158	0.956853	-9.12519	#N/A	#N/A	#N/A	#N/A	#N/A	#N/A	#N/A	#N/A	#N/A	#N/A	#N/A	#N/A
155903	3	0.610771	-8.15238	0.0667788	0.3145	8.24943	0.515058	0.592246	0.515581	#N/A	#N/A	#N/A	#N/A	#N/A	#N/A	#N/A	#N/A	#N/A	#N/A	#N/A	#N/A
155990	3	0.32185	0.152487	0.693081	-9.485	8.93584	-1.22328	0.723323	1.74451	#N/A	#N/A	#N/A	#N/A	#N/A	#N/A	#N/A	#N/A	#N/A	#N/A	#N/A	#N/A
157032	3	1.21283	-8.49575	0.918804	-9.31177	8.36416	0.732493	0.304217	0.877478	#N/A	#N/A	#N/A	#N/A	#N/A	#N/A	#N/A	#N/A	#N/A	#N/A	#N/A	#N/A
157405	3	0.609046	-8.78167	0.804192	-0.485135	8.74804	1.87456	-0.113195	-0.067769	#N/A	#N/A	#N/A	#N/A	#N/A	#N/A	#N/A	#N/A	#N/A	#N/A	#N/A	#N/A
157742	3	-0.263212	-8.62076	0.680388	1.16437	7.97718	2.7684	0.10434	-8.90694	#N/A	#N/A	#N/A	#N/A	#N/A	#N/A	#N/A	#N/A	#N/A	#N/A	#N/A	#N/A
157748	3	0.467861	0.291917	-9.33184	0.594307	8.0446	0.381674	0.102054	0.245706	#N/A	#N/A	#N/A	#N/A	#N/A	#N/A	#N/A	#N/A	#N/A	#N/A	#N/A	#N/A
157933	3	1.61456	-8.03038	-8.82065	0.40098	8.49231	0.641446	1.35772	0.385031	#N/A	#N/A	#N/A	#N/A	#N/A	#N/A	#N/A	#N/A	#N/A	#N/A	#N/A	#N/A
158667	3	0.538906	-8.38514	-0.128621	0.45127	8.34557	2.05133	1.24412	-8.84238	#N/A	#N/A	#N/A	#N/A	#N/A	#N/A	#N/A	#N/A	#N/A	#N/A	#N/A	#N/A
158992	3	0.690378	-8.46385	0.795842	-0.471404	7.77275	0.864092	-0.259045	0.457612	#N/A	#N/A	#N/A	#N/A	#N/A	#N/A	#N/A	#N/A	#N/A	#N/A	#N/A	#N/A
159238	3	7.08343	-6.28777	-7.04025	-7.09926	7.6312	0.86299	1.06504	1.0613	#N/A	#N/A	#N/A	#N/A	#N/A	#N/A	#N/A	#N/A	#N/A	#N/A	#N/A	#N/A
159544	3	0.459739	-7.34937	0.0371665	0.594961	7.4123	1.4668	0.195795	0.045672	#N/A	#N/A	#N/A	#N/A	#N/A	#N/A	#N/A	#N/A	#N/A	#N/A	#N/A	#N/A
160302	3	-22.3398	-21.7212	2.31385	-23.4055	10.0793	-0.191396	1.20783	0.94794	#N/A	#N/A	#N/A	#N/A	#N/A	#N/A	#N/A	#N/A	#N/A	#N/A	#N/A	#N/A
160622	3	0.843573	0.300789	-0.391664	-9.30822	8.60258	0.343193	1.41365	-0.278619	#N/A	#N/A	#N/A	#N/A	#N/A	#N/A	#N/A	#N/A	#N/A	#N/A	#N/A	#N/A
161363	3	0.140743	0.684931	-11.2512	0.361633	10.6579	0.821359	0.975144	-0.446591	#N/A	#N/A	#N/A	#N/A	#N/A	#N/A	#N/A	#N/A	#N/A	#N/A	#N/A	#N/A
162002	3	0.132182	-9.56946	0.540565	0.584217	9.66307	0.96256	0.42317	0.122062	#N/A	#N/A	#N/A	#N/A	#N/A	#N/A	#N/A	#N/A	#N/A	#N/A	#N/A	#N/A
162765	3	-0.323125	0.70524	-9.05199	0.462799	9.00065	-0.37098	2.76541	-0.720457	#N/A	#N/A	#N/A	#N/A	#N/A	#N/A	#N/A	#N/A	#N/A	#N/A	#N/A	#N/A
164238	3	0.460468	-8.54605	1.01169	-0.497505	8.1699	0.523103	0.0690748	0.542572	#N/A	#N/A	#N/A	#N/A	#N/A	#N/A	#N/A	#N/A	#N/A	#N/A	#N/A	#N/A
165242	3	0.40459	-7.95409	0.224723	0.389289	7.63497	1.49525	1.34346	-8.23648	#N/A	#N/A	#N/A	#N/A	#N/A	#N/A	#N/A	#N/A	#N/A	#N/A	#N/A	#N/A
165764	3	-0.074715	0.589378	-9.01097	0.731751	8.09698	0.691616	2.35686	-8.73158	#N/A	#N/A	#N/A	#N/A	#N/A	#N/A	#N/A	#N/A	#N/A	#N/A	#N/A	#N/A
167468	3	0.657235	0.308402	-0.0539421	-8.71234	-0.694203	0.221851	0.683749	-8.29779	#N/A	#N/A	#N/A	#N/A	#N/A	#N/A	#N/A	#N/A	#N/A	#N/A	#N/A	#N/A
168163	3	0.140371	0.60946	-9.62982	0.821991	8.0103	-0.577722	0.999847	-0.041034	#N/A	#N/A	#N/A	#N/A	#N/A	#N/A	#N/A	#N/A	#N/A	#N/A	#N/A	#N/A
168165	3	0.140479	0.609567	-9.62983	0.821926	8.01029	-0.577865	0.999876	-0.041188	#N/A	#N/A	#N/A	#N/A	#N/A	#N/A	#N/A	#N/A	#N/A	#N/A	#N/A	#N/A
169676	3	-0.232283	-8.85916	-0.464918	1.12213	9.25664	-0.623509	2.73787	-2.3586	#N/A	#N/A	#N/A	#N/A	#N/A	#N/A	#N/A	#N/A	#N/A	#N/A	#N/A	#N/A
170503	3	0.653771	0.240573	0.123432	-8.3393	0.110627	-7.99834	1.09942	0.985207	#N/A	#N/A	#N/A	#N/A	#N/A	#N/A	#N/A	#N/A	#N/A	#N/A	#N/A	#N/A
171563	3	0.566246	0.343104	0.0888472	-9.84461	0.0596701	0.302147	0.95682	-9.12519	#N/A	#N/A	#N/A	#N/A	#N/A	#N/A	#N/A	#N/A	#N/A	#N/A	#N/A	#N/A
172529	3	0.528507	0.420648	0.21669	-9.15547	8.229	-0.395759	0.931023	0.803776	#N/A	#N/A	#N/A	#N/A	#N/A	#N/A	#N/A	#N/A	#N/A	#N/A	#N/A	#N/A
172637	3	7.54449	-6.7021	-7.54095	-7.59994	8.14022	0.581868	1.20362	1.17965	#N/A	#N/A	#N/A	#N/A	#N/A	#N/A	#N/A	#N/A	#N/A	#N/A	#N/A	#N/A
172714	3	0.650412	-0.658406	0.747763	-9.58427	9.06938	0.631067	0.217964	1.07069	#N/A	#N/A	#N/A	#N/A	#N/A	#N/A	#N/A	#N/A	#N/A	#N/A	#N/A	#N/A
172788	3	-0.643243	-8.73255	0.879001	0.645666	9.88801	0.987766	0.534819	0.598011	#N/A	#N/A	#N/A	#N/A	#N/A	#N/A	#N/A	#N/A	#N/A	#N/A	#N/A	#N/A
173388	3	0.476828	0.568927	-9.81079	0.290531	1.13447	-8.92472	2.02751	0.360327	#N/A	#N/A	#N/A	#N/A	#N/A	#N/A	#N/A	#N/A	#N/A	#N/A	#N/A	#N/A
173986	3	8.0887	-7.19205	-8.22463	-8.2836	8.82384	0.114794	1.60233	1.13787	#N/A	#N/A	#N/A	#N/A	#N/A	#N/A	#N/A	#N/A	#N/A	#N/A	#N/A	#N/A
174356	3	1.80824	0.150446	-9.19016	-2.26829	0.0554256	-8.59339	2.73624	-0.821357	#N/A	#N/A	#N/A	#N/A	#N/A	#N/A	#N/A	#N/A	#N/A	#N/A	#N/A	#N/A
174875	3	2.37986	-9.17933	-1.40756	-1.62913	9.46019	1.71569	1.94688	-9.56132	#N/A	#N/A	#N/A	#N/A	#N/A	#N/A	#N/A	#N/A	#N/A	#N/A	#N/A	#N/A
174955	3	0.747496	0.504562	-9.24553	-0.0553625	-0.447752	-8.75546	0.886705	0.717912	#N/A	#N/A	#N/A	#N/A	#N/A	#N/A	#N/A	#N/A	#N/A	#N/A	#N/A	#N/A
175457	3	0.69643	-7.29817	-0.161583	0.329286	7.53332	1.0834	0.48249	0.336049	#N/A	#N/A	#N/A	#N/A	#N/A	#N/A	#N/A	#N/A	#N/A	#N/A	#N/A	#N/A
175544	3	-8.61727	2.17666	0.548808	1.2954	0.955994	-7.8435	1.38587	0.230033	#N/A	#N/A	#N/A	#N/A	#N/A	#N/A	#N/A	#N/A	#N/A	#N/A	#N/A	#N/A
177541	3	1.77536	-8.11397	-9.14102	0.228442	0.160725	-8.35517	1.45564	0.63194	#N/A	#N/A	#N/A	#N/A	#N/A	#N/A	#N/A	#N/A	#N/A	#N/A	#N/A	#N/A
177752	3	-0.319507	-6.72539	2.70817	-21.278	6.24567	8.06557	-7.78744	-6.20634	#N/A	#N/A	#N/A	#N/A	#N/A	#N/A	#N/A	#N/A	#N/A	#N/A	#N/A	#N/A
177839	3	0.595604	-8.99809	0.139784	0.29557	9.26975	0.740045	0.28619	0.776514	#N/A	#N/A	#N/A	#N/A	#N/A	#N/A	#N/A	#N/A	#N/A	#N/A	#N/A	#N/A
178203	3	0.578499	0.543096	0.00892841	-8.41286	7.37265	-0.156855	0.895918	0.544629	#N/A	#N/A	#N/A	#N/A	#N/A	#N/A	#N/A	#N/A	#N/A	#N/A	#N/A	#N/A
178755	3	0.550458	-6.90184	1.83961	-21.4688	6.19723	8.0105	-7.61965	-6.15759	#N/A	#N/A	#N/A	#N/A	#N/A	#N/A	#N/A	#N/A	#N/A	#N/A	#N/A	#N/A
179130	3	0.674566	0.788356	-9.00498	-0.269736	-0.68693	-8.54514	0.854353	0.580267	#N/A	#N/A	#N/A	#N/A	#N/A	#N/A	#N/A	#N/A	#N/A	#N/A	#N/A	#N/A
179566	3	1.20766	-9.29246	1.05564	-10.0242	9.00012	0.722908	-0.875504	1.99626	#N/A	#N/A	#N/A	#N/A	#N/A	#N/A	#N/A	#N/A	#N/A	#N/A	#N/A	#N/A
180763	3	0.753798	0.059494	0.19521	-8.1261	7.28049	-0.0246597	0.786476	0.833186	#N/A	#N/A	#N/A	#N/A	#N/A	#N/A	#N/A	#N/A	#N/A	#N/A	#N/A	#N/A
180920	3	0.808178	-8.47815	1.58232	-22.7436	21.3851	9.59409	-9.10598	-21.8773	#N/A	#N/A	#N/A	#N/A	#N/A	#N/A	#N/A	#N/A	#N/A	#N/A	#N/A	#N/A
181150	3	7.86822	-7.00895	-7.87404	-7.93302	8.47151	0.476213	1.22582	1.24713	#N/A	#N/A	#N/A	#N/A	#N/A	#N/A	#N/A	#N/A	#N/A	#N/A	#N/A	#N/A
181789	3	0.996276	-7.87216	0.681876	-1.11405	7.07283	1.11	0.0720465	-0.068665	#N/A	#N/A	#N/A	#N/A	#N/A	#N/A	#N/A	#N/A	#N/A	#N/A	#N/A	#N/A
182007	3	0.189225	1.23115	0.0536256	-8.42068	-0.0724539	-7.823	0.53033	1.27523	#N/A	#N/A	#N/A	#N/A	#N/A	#N/A	#N/A	#N/A	#N/A	#N/A	#N/A	#N/A
182101	3	1.1933	-7.83208	-0.460639	-0.202583	7.80457	0.775373	1.19895	-0.258258	#N/A	#N/A	#N/A	#N/A	#N/A	#N/A	#N/A	#N/A	#N/A	#N/A	#N/A	#N/A
182494	3	1.12703	-7.40285	0.502566	-8.56548	8.3832	-0.197621	1.79168	0.122677	#N/A	#N/A	#N/A	#N/A	#N/A	#N/A	#N/A	#N/A	#N/A	#N/A	#N/A	#N/A
182932	3	0.184798	-7.79288	0.479067	0.421929	8.0233	0.965619	0.738912	-0.139194	#N/A	#N/A	#N/A	#N/A	#N/A	#N/A	#N/A	#N/A	#N/A	#N/A	#N/A	#N/A
184359	3	-0.232283	-8.85916	-0.464918	1.12213	9.25664	-0.623509	2.73787	-2.3586	#N/A	#N/A	#N/A	#N/A	#N/A	#N/A	#N/A	#N/A	#N/A	#N/A	#N/A	#N/A
184521	3	7.68744	-6.38751	-7.0973	-7.15629	5.34193	-4.89541	-5.66833	7.2394	#N/A	#N/A	#N/A	#N/A	#N/A	#N/A	#N/A	#N/A	#N/A	#N/A	#N/A	#N/A
184842	3	0.584576	0.0486917	-8.77579	0.135144	8.39478	1.11561	1.66911	-1.44618	#N/A	#N/A	#N/A	#N/A	#N/A	#N/A	#N/A	#N/A	#N/A	#N/A	#N/A	#N/A
185162	3	1.03222	-1.14162	0.770674	-8.83451	-1.23487	0.797443	-9.37694	0.170661	#N/A	#N/A	#N/A	#N/A	#N/A	#N/A	#N/A	#N/A	#N/A	#N/A	#N/A	#N/A
185657	3	0.610771	-8.15238	0.0667788	0.3145	8.24943	0.515058	0.592246	0.515581	#N/A	#N/A	#N/A	#N/A	#N/A	#N/A	#N/A	#N/A	#N/A	#N/A	#N/A	#N/A
185741	3	0.942279	0.149686	-0.418455	-9.12239	8.64835	0.0768023	1.4224	0.394254	#N/A	#N/A	#N/A	#N/A	#N/A	#N/A	#N/A	#N/A	#N/A	#N/A	#N/A	#N/A
185806	3	8.91112	-7.89247	-8.31983	-8.3788	6.82257	8.63388	-7.14481	-6.78367	#N/A	#N/A	#N/A	#N/A	#N/A	#N/A	#N/A	#N/A	#N/A	#N/A	#N/A	#N/A
186422	3	7.98812	-6.68769	-7.71399	-7.77298	6.09308	-5.64253	7.88036	-6.05469	#N/A	#N/A	#N/A	#N/A	#N/A	#N/A	#N/A	#N/A	#N/A	#N/A	#N/A	#N/A
186929	3	8.14806	-6.84797	-7.55763	-7.61661	5.78147	-5.33037	-6.10419	7.68023	#N/A	#N/A	#N/A	#N/A	#N/A	#N/A	#N/A	#N/A	#N/A	#N/A	#N/A	#N/A
187070	3	0.299296	0.460651	-9.25146	0.689656	8.22471	-0.0981776	0.0150896	0.834167	#N/A	#N/A	#N/A	#N/A	#N/A	#N/A	#N/A	#N/A	#N/A	#N/A	#N/A	#N/A
187095	3	0.74298	-8.90829	0.36033	-0.128296	8.39783	2.22184	0.714236	-8.88004	#N/A	#N/A	#N/A	#N/A	#N/A	#N/A	#N/A	#N/A	#N/A	#N/A	#N/A	#N/A
188049	3	-0.182695	-8.40228	1.06454	0.254268	8.71637	0.431984	0.613569	0.323135	#N/A	#N/A	#N/A	#N/A	#N/A	#N/A	#N/A	#N/A	#N/A	#N/A	#N/A	#N/A
188544	3	0.181475	-8.14248	0.498146	0.278981	8.68788	0.256511	0.858873	0.548258	#N/A	#N/A	#N/A	#N/A	#N/A	#N/A	#N/A	#N/A	#N/A	#N/A	#N/A	#N/A
189012	3	0.428238	0.0538352	0.548266	-8.38493	-0.582009	-8.11151	0.843453	0.556016	#N/A	#N/A	#N/A	#N/A	#N/A	#N/A	#N/A	#N/A	#N/A	#N/A	#N/A	#N/A
189298	3	0.0319261	0.7635	-8.18357	0.799794	-0.494851	-7.60497	0.975776	0.256566	#N/A	#N/A	#N/A	#N/A	#N/A	#N/A	#N/A	#N/A	#N/A	#N/A	#N/A	#N/A
189737	3	0.112114	1.0451	0.351499	-8.81427	-0.486992	-8.4764	0.314706	1.23198	#N/A	#N/A	#N/A	#N/A	#N/A	#N/A	#N/A	#N/A	#N/A	#N/A	#N/A	#N/A
189746	3	1.7986	-7.66725	0.144469	-8.80508	-0.0611866	-8.28184	0.796128	1.22907	#N/A	#N/A	#N/A	#N/A	#N/A	#N/A	#N/A	#N/A	#N/A	#N/A	#N/A	#N/A
191975	3	0.0709193	-0.195326	-9.49666	0.979208	9.17273	1.19331	1.50639	-1.26988	#N/A	#N/A	#N/A	#N/A	#N/A	#N/A	#N/A	#N/A	#N/A	#N/A	#N/A	#N/A
196991	3	0.226047	0.581178	-10.0828	0.637083	8.63829	0.395206	0.923269	-0.773035	#N/A	#N/A	#N/A	#N/A	#N/A	#N/A	#N/A	#N/A	#N/A	#N/A	#N/A	#N/A
197268	3	7.22266	-6.24262	-7.12123	-7.18023	7.59848	0.0950857	1.05301	1.68968	#N/A	#N/A	#N/A	#N/A	#N/A	#N/A	#N/A	#N/A	#N/A	#N/A	#N/A	#N/A
198108	3	0.550458	-6.90184	1.83961	-21.4688	6.19723	8.0105	-7.61965	-6.15759	#N/A	#N/A	#N/A	#N/A	#N/A	#N/A	#N/A	#N/A	#N/A	#N/A	#N/A	#N/A
199619	3	0.0783303	-8.52242	1.00339	0.736651	6.96515	8.77804	-8.63216	-8.14755	#N/A	#N/A	#N/A	#N/A	#N/A	#N/A	#N/A	#N/A	#N/A	#N/A	#N/A	#N/A
199903	3	0.995139	-0.515491	-7.86245	0.166288	7.44794	0.96658	1.02912	0.042542	#N/A	#N/A	#N/A	#N/A	#N/A	#N/A	#N/A	#N/A	#N/A	#N/A	#N/A	#N/A
199914	3	7.54449	-6.7021	-7.54095	-7.59994	8.14022	0.581868	1.20362	1.17965	#N/A	#N/A	#N/A	#N/A	#N/A	#N/A	#N/A	#N/A	#N/A	#N/A	#N/A	#N/A
200061	3	8.61321	-7.55868	-8.16637	-8.22538	8.39224	0.367166	-0.625197	2.68603	#N/A	#N/A	#N/A	#N/A	#N/A	#N/A	#N/A	#N/A	#N/A	#N/A	#N/A	#N/A
200301	3	0.21458	-8.64893	0.749704	0.347167	8.78747	1.01906	-0.147889	0.699196	#N/A	#N/A	#N/A	#N/A	#N/A	#N/A	#N/A	#N/A	#N/A	#N/A	#N/A	#N/A
200852	3	7.92658	-7.23485	-8.147	-8.20597	9.14547	0.395351	1.1399	1.39691	#N/A	#N/A	#N/A	#N/A	#N/A	#N/A	#N/A	#N/A	#N/A	#N/A	#N/A	#N/A
200867	3	8.089	-7.14419	-7.90347	-7.96245	8.16158	0.711737	1.02172	1.24416	#N/A	#N/A	#N/A	#N/A	#N/A	#N/A	#N/A	#N/A	#N/A	#N/A	#N/A	#N/A
201408	3	2.37986	-9.17933	-1.40756	-1.62913	9.46019	1.71569	1.94688	-9.56132	#N/A	#N/A	#N/A	#N/A	#N/A	#N/A	#N/A	#N/A	#N/A	#N/A	#N/A	#N/A
203375	3	-0.171069	1.256	0.511806	-8.67963	-0.487011	-8.47633	0.314712	1.23198	#N/A	#N/A	#N/A	#N/A	#N/A	#N/A	#N/A	#N/A	#N/A	#N/A	#N/A	#N/A
205769	3	-1.01426	-8.75651	1.585	0.106862	9.44233	1.38902	0.937153	-1.39791	#N/A	#N/A	#N/A	#N/A	#N/A	#N/A	#N/A	#N/A	#N/A	#N/A	#N/A	#N/A
205821	3	0.408886	-9.76732	-0.414678	0.153463	10.9026	1.36007	1.42605	-0.699842	#N/A	#N/A	#N/A	#N/A	#N/A	#N/A	#N/A	#N/A	#N/A	#N/A	#N/A	#N/A
207612	3	8.0887	-7.19205	-8.22463	-8.2836	8.82384	0.114794	1.60233	1.13787	#N/A	#N/A	#N/A	#N/A	#N/A	#N/A	#N/A	#N/A	#N/A	#N/A	#N/A	#N/A
208662	3	8.91112	-7.89247	-8.31983	-8.3788	6.82257	8.63388	-7.14481	-6.78367	#N/A	#N/A	#N/A	#N/A	#N/A	#N/A	#N/A	#N/A	#N/A	#N/A	#N/A	#N/A
208854	3	0.299296	0.460651	-9.25146	0.689656	8.22471	-0.0981776	0.0150896	0.834167	#N/A	#N/A	#N/A	#N/A	#N/A	#N/A	#N/A	#N/A	#N/A	#N/A	#N/A	#N/A
209413	3	8.02941	-7.26599	-8.02	-8.07899	8.58209	1.03516	1.24332	0.69918	#N/A	#N/A	#N/A	#N/A	#N/A	#N/A	#N/A	#N/A	#N/A	#N/A	#N/A	#N/A
209494	3	0.653771	0.240573	0.123432	-8.3393	0.110627	-7.99834	1.09942	0.985207	#N/A	#N/A	#N/A	#N/A	#N/A	#N/A	#N/A	#N/A	#N/A	#N/A	#N/A	#N/A
209643	3	1.09927	-7.93831	0.667486	-8.838	8.57603	1.26407	1.40008	-1.39834	#N/A	#N/A	#N/A	#N/A	#N/A	#N/A	#N/A	#N/A	#N/A	#N/A	#N/A	#N/A
210187	3	1.11705	-8.50081	-0.0509363	0.107816	-0.625845	1.54013	-9.52632	-0.001682	#N/A	#N/A	#N/A	#N/A	#N/A	#N/A	#N/A	#N/A	#N/A	#N/A	#N/A	#N/A
210356	3	-22.3398	-21.7212	2.31385	-23.4055	10.0793	-0.191396	1.20783	0.94794	#N/A	#N/A	#N/A	#N/A	#N/A	#N/A	#N/A	#N/A	#N/A	#N/A	#N/A	#N/A
210636	3	-0.134465	-7.91837	0.865358	0.961109	7.88585	0.563091	-1.24956	1.2323	#N/A	#N/A	#N/A	#N/A	#N/A	#N/A	#N/A	#N/A	#N/A	#N/A	#N/A	#N/A
210842	3	2.00231	-0.822074	-0.977214	-8.65736	-1.02043	1.23753	-8.862	-0.353548	#N/A	#N/A	#N/A	#N/A	#N/A	#N/A	#N/A	#N/A	#N/A	#N/A	#N/A	#N/A
211086	3	-1.48154	-7.14802	3.86952	-21.6326	6.95988	8.77893	-8.54257	-21.1418	#N/A	#N/A	#N/A	#N/A	#N/A	#N/A	#N/A	#N/A	#N/A	#N/A	#N/A	#N/A
211917	3	0.538906	-8.38514	-0.128621	0.45127	8.34557	2.05133	1.24412	-8.84238	#N/A	#N/A	#N/A	#N/A	#N/A	#N/A	#N/A	#N/A	#N/A	#N/A	#N/A	#N/A
212391	3	7.89343	-6.96775	-7.91792	-7.97689	8.5079	0.110433	1.29753	1.45192	#N/A	#N/A	#N/A	#N/A	#N/A	#N/A	#N/A	#N/A	#N/A	#N/A	#N/A	#N/A
212567	3	0.32185	0.152487	0.693081	-9.485	8.93584	-1.22328	0.723323	1.74451	#N/A	#N/A	#N/A	#N/A	#N/A	#N/A	#N/A	#N/A	#N/A	#N/A	#N/A	#N/A
212947	3	0.250114	0.167989	-8.72323	0.691867	8.20843	0.45158	1.35715	-0.094716	#N/A	#N/A	#N/A	#N/A	#N/A	#N/A	#N/A	#N/A	#N/A	#N/A	#N/A	#N/A
213512	3	9.07518	-7.77469	-8.48437	-8.54334	6.22241	-5.77243	-6.5459	8.12124	#N/A	#N/A	#N/A	#N/A	#N/A	#N/A	#N/A	#N/A	#N/A	#N/A	#N/A	#N/A
213702	3	0.260632	1.12752	-8.5805	-0.0947013	7.29501	-0.380143	0.789489	0.49304	#N/A	#N/A	#N/A	#N/A	#N/A	#N/A	#N/A	#N/A	#N/A	#N/A	#N/A	#N/A
214127	3	0.320611	-8.61432	-0.358366	0.786642	8.40623	0.562182	2.21434	-9.13775	#N/A	#N/A	#N/A	#N/A	#N/A	#N/A	#N/A	#N/A	#N/A	#N/A	#N/A	#N/A
214900	3	0.0904573	-7.38362	0.174726	0.889813	7.44092	0.539458	0.779855	-0.025787	#N/A	#N/A	#N/A	#N/A	#N/A	#N/A	#N/A	#N/A	#N/A	#N/A	#N/A	#N/A
216049	3	0.74298	-8.90829	0.36033	-0.128296	8.39783	2.22184	0.714236	-8.88004	#N/A	#N/A	#N/A	#N/A	#N/A	#N/A	#N/A	#N/A	#N/A	#N/A	#N/A	#N/A
220238	3	-0.643243	-8.73255	0.879001	0.645666	9.88801	0.987766	0.534819	0.598011	#N/A	#N/A	#N/A	#N/A	#N/A	#N/A	#N/A	#N/A	#N/A	#N/A	#N/A	#N/A
220465	3	0.466141	0.448741	-8.68774	0.44902	7.59457	0.079733	-0.0279447	0.773243	#N/A	#N/A	#N/A	#N/A	#N/A	#N/A	#N/A	#N/A	#N/A	#N/A	#N/A	#N/A
220536	3	0.22077	-8.66111	0.249495	0.647894	8.44393	1.98841	1.07166	-9.05839	#N/A	#N/A	#N/A	#N/A	#N/A	#N/A	#N/A	#N/A	#N/A	#N/A	#N/A	#N/A
221733	3	6.83797	-5.96715	-6.73082	-6.78987	7.00125	1.02974	1.34214	0.578217	#N/A	#N/A	#N/A	#N/A	#N/A	#N/A	#N/A	#N/A	#N/A	#N/A	#N/A	#N/A
221973	3	-8.61886	2.17665	0.548827	1.29541	0.955747	-7.84277	1.3863	0.230197	#N/A	#N/A	#N/A	#N/A	#N/A	#N/A	#N/A	#N/A	#N/A	#N/A	#N/A	#N/A
222021	3	0.543403	-7.20107	-0.0624372	0.433316	7.53326	1.0835	0.482518	0.336126	#N/A	#N/A	#N/A	#N/A	#N/A	#N/A	#N/A	#N/A	#N/A	#N/A	#N/A	#N/A
222450	3	8.04655	-7.21876	-7.91628	-7.97526	8.38043	1.0217	0.953186	1.02066	#N/A	#N/A	#N/A	#N/A	#N/A	#N/A	#N/A	#N/A	#N/A	#N/A	#N/A	#N/A
222621	3	0.593842	-8.61309	-0.569441	0.45584	8.98452	-0.29906	1.9847	-0.426562	#N/A	#N/A	#N/A	#N/A	#N/A	#N/A	#N/A	#N/A	#N/A	#N/A	#N/A	#N/A
222690	3	-0.0158895	-8.55795	0.694505	0.501659	8.84979	1.22643	0.566189	-0.189173	#N/A	#N/A	#N/A	#N/A	#N/A	#N/A	#N/A	#N/A	#N/A	#N/A	#N/A	#N/A
223314	3	1.79944	-8.04719	0.377146	-8.68427	8.56756	1.13295	-0.519602	1.7516	#N/A	#N/A	#N/A	#N/A	#N/A	#N/A	#N/A	#N/A	#N/A	#N/A	#N/A	#N/A
223649	3	1.0842	-9.72275	-0.411236	-0.205643	10.3368	0.963832	0.87546	0.433425	#N/A	#N/A	#N/A	#N/A	#N/A	#N/A	#N/A	#N/A	#N/A	#N/A	#N/A	#N/A
224321	3	8.19506	-7.14777	-7.60433	-7.66331	5.93401	7.75261	-6.25667	-5.89529	#N/A	#N/A	#N/A	#N/A	#N/A	#N/A	#N/A	#N/A	#N/A	#N/A	#N/A	#N/A
224332	3	0.996276	-7.87216	0.681876	-1.11405	7.07283	1.11	0.0720465	-0.068665	#N/A	#N/A	#N/A	#N/A	#N/A	#N/A	#N/A	#N/A	#N/A	#N/A	#N/A	#N/A
224366	3	8.75987	-7.76116	-8.58366	-8.64263	8.58168	0.692248	1.48554	0.776631	#N/A	#N/A	#N/A	#N/A	#N/A	#N/A	#N/A	#N/A	#N/A	#N/A	#N/A	#N/A
224679	3	7.86822	-7.00895	-7.87404	-7.93302	8.47151	0.476213	1.22582	1.24713	#N/A	#N/A	#N/A	#N/A	#N/A	#N/A	#N/A	#N/A	#N/A	#N/A	#N/A	#N/A
228715	3	-0.38514	-6.60261	2.77024	-21.3422	-0.735891	0.31981	-8.8093	1.4523	#N/A	#N/A	#N/A	#N/A	#N/A	#N/A	#N/A	#N/A	#N/A	#N/A	#N/A	#N/A
228836	3	-0.319507	-6.72539	2.70817	-21.278	6.24567	8.06557	-7.78744	-6.20634	#N/A	#N/A	#N/A	#N/A	#N/A	#N/A	#N/A	#N/A	#N/A	#N/A	#N/A	#N/A
231086	3	-0.185531	0.976827	-9.74059	0.78131	21.7118	-8.5358	9.79599	-9.02014	#N/A	#N/A	#N/A	#N/A	#N/A	#N/A	#N/A	#N/A	#N/A	#N/A	#N/A	#N/A
232128	3	0.227509	0.469999	-9.10338	0.750177	7.91153	0.309337	0.37518	0.115452	#N/A	#N/A	#N/A	#N/A	#N/A	#N/A	#N/A	#N/A	#N/A	#N/A	#N/A	#N/A
232984	3	1.03339	-8.18029	0.150502	-0.56411	8.32006	-0.0538772	0.778475	0.897213	#N/A	#N/A	#N/A	#N/A	#N/A	#N/A	#N/A	#N/A	#N/A	#N/A	#N/A	#N/A
233754	3	1.2044	-8.26041	-0.826443	0.226075	8.22991	2.31286	0.151723	-0.643202	#N/A	#N/A	#N/A	#N/A	#N/A	#N/A	#N/A	#N/A	#N/A	#N/A	#N/A	#N/A
233842	3	0.689679	0.252174	0.0388071	-9.22481	0.00342383	0.622796	0.579749	-8.43059	#N/A	#N/A	#N/A	#N/A	#N/A	#N/A	#N/A	#N/A	#N/A	#N/A	#N/A	#N/A
234831	3	8.75279	-7.6649	-8.67979	-8.73877	8.85759	-0.369001	1.65569	1.39334	#N/A	#N/A	#N/A	#N/A	#N/A	#N/A	#N/A	#N/A	#N/A	#N/A	#N/A	#N/A
235350	3	0.640167	-8.45126	0.382281	0.0145879	8.2858	1.6261	0.376201	-0.500963	#N/A	#N/A	#N/A	#N/A	#N/A	#N/A	#N/A	#N/A	#N/A	#N/A	#N/A	#N/A
235646	3	-0.48514	0.0681512	-8.95751	1.53872	8.27271	-0.691251	2.33476	-0.500563	#N/A	#N/A	#N/A	#N/A	#N/A	#N/A	#N/A	#N/A	#N/A	#N/A	#N/A	#N/A
237769	3	1.15951	-8.74261	0.213484	-1.02141	9.453	0.946933	0.155216	1.22495	#N/A	#N/A	#N/A	#N/A	#N/A	#N/A	#N/A	#N/A	#N/A	#N/A	#N/A	#N/A
238818	3	1.84479	-8.89334	0.545976	-23.2913	22.4265	10.2753	-9.32454	-22.5083	#N/A	#N/A	#N/A	#N/A	#N/A	#N/A	#N/A	#N/A	#N/A	#N/A	#N/A	#N/A
239676	3	7.54449	-6.7021	-7.54095	-7.59994	8.14022	0.581868	1.20362	1.17965	#N/A	#N/A	#N/A	#N/A	#N/A	#N/A	#N/A	#N/A	#N/A	#N/A	#N/A	#N/A
240737	3	0.618453	-8.32169	0.0828978	0.307166	7.57926	1.04462	1.43191	-8.32596	#N/A	#N/A	#N/A	#N/A	#N/A	#N/A	#N/A	#N/A	#N/A	#N/A	#N/A	#N/A
240985	3	0.961956	-7.8579	-0.151577	0.430878	-0.747553	0.832449	-9.09147	0.601041	#N/A	#N/A	#N/A	#N/A	#N/A	#N/A	#N/A	#N/A	#N/A	#N/A	#N/A	#N/A
241000	3	-0.058819	-8.73134	1.15637	0.770978	-0.734097	1.06569	-10.108	0.305547	#N/A	#N/A	#N/A	#N/A	#N/A	#N/A	#N/A	#N/A	#N/A	#N/A	#N/A	#N/A
241216	3	6.94903	-5.96647	-6.85119	-6.91022	6.99734	0.510866	1.61413	0.79153	#N/A	#N/A	#N/A	#N/A	#N/A	#N/A	#N/A	#N/A	#N/A	#N/A	#N/A	#N/A
243725	3	0.192584	0.399029	-9.41633	0.665806	8.20682	0.675343	2.27812	-8.93661	#N/A	#N/A	#N/A	#N/A	#N/A	#N/A	#N/A	#N/A	#N/A	#N/A	#N/A	#N/A
243830	3	0.731045	-0.890146	-8.41959	0.947607	7.10837	1.37908	0.232783	-0.623047	#N/A	#N/A	#N/A	#N/A	#N/A	#N/A	#N/A	#N/A	#N/A	#N/A	#N/A	#N/A
244159	3	1.03375	-8.18055	0.150609	-0.56395	8.32246	-0.0537448	0.778527	0.897343	#N/A	#N/A	#N/A	#N/A	#N/A	#N/A	#N/A	#N/A	#N/A	#N/A	#N/A	#N/A
244617	3	1.57894	-0.91449	-0.124971	-8.76179	-1.24194	1.11252	-9.07248	-0.464716	#N/A	#N/A	#N/A	#N/A	#N/A	#N/A	#N/A	#N/A	#N/A	#N/A	#N/A	#N/A
244642	3	7.32054	-6.28204	-7.34472	-7.40371	7.67838	-0.277599	1.74771	1.24077	#N/A	#N/A	#N/A	#N/A	#N/A	#N/A	#N/A	#N/A	#N/A	#N/A	#N/A	#N/A
244866	3	7.5529	-6.25275	-7.44284	-7.50183	6.3445	-5.89321	8.13809	-6.30584	#N/A	#N/A	#N/A	#N/A	#N/A	#N/A	#N/A	#N/A	#N/A	#N/A	#N/A	#N/A
245497	3	1.80834	0.150449	-9.19019	-2.26832	0.0556139	-8.59395	2.7363	-0.821441	#N/A	#N/A	#N/A	#N/A	#N/A	#N/A	#N/A	#N/A	#N/A	#N/A	#N/A	#N/A
245969	3	0.22377	0.64838	-9.63371	0.693666	7.93731	-0.267399	0.221844	0.144038	#N/A	#N/A	#N/A	#N/A	#N/A	#N/A	#N/A	#N/A	#N/A	#N/A	#N/A	#N/A
246081	3	7.20727	-5.90748	-7.03049	-7.08951	5.75174	-5.30369	7.54538	-5.71376	#N/A	#N/A	#N/A	#N/A	#N/A	#N/A	#N/A	#N/A	#N/A	#N/A	#N/A	#N/A
246082	3	7.20727	-5.90748	-7.03049	-7.08951	5.75174	-5.30369	7.54538	-5.71376	#N/A	#N/A	#N/A	#N/A	#N/A	#N/A	#N/A	#N/A	#N/A	#N/A	#N/A	#N/A
246739	3	-0.746706	1.56657	-10.2297	1.22809	1.80885	-9.93638	-1.32867	2.01171	#N/A	#N/A	#N/A	#N/A	#N/A	#N/A	#N/A	#N/A	#N/A	#N/A	#N/A	#N/A
246977	3	0.744329	-7.93613	0.0542172	0.00156527	8.12084	0.507052	0.923966	0.28423	#N/A	#N/A	#N/A	#N/A	#N/A	#N/A	#N/A	#N/A	#N/A	#N/A	#N/A	#N/A
247129	3	0.504048	-7.71449	0.598681	-0.151636	7.94611	0.977273	0.339554	0.493454	#N/A	#N/A	#N/A	#N/A	#N/A	#N/A	#N/A	#N/A	#N/A	#N/A	#N/A	#N/A
247329	3	0.533041	-8.765	0.261664	0.187742	9.06209	0.683376	0.543718	0.575252	#N/A	#N/A	#N/A	#N/A	#N/A	#N/A	#N/A	#N/A	#N/A	#N/A	#N/A	#N/A
247389	3	-0.392798	1.11438	-9.12294	1.0258	7.9652	-0.591157	0.4599	0.500276	#N/A	#N/A	#N/A	#N/A	#N/A	#N/A	#N/A	#N/A	#N/A	#N/A	#N/A	#N/A
247939	3	1.16173	-0.256819	-0.149402	-8.49249	-1.06138	-8.09155	0.810265	0.198442	#N/A	#N/A	#N/A	#N/A	#N/A	#N/A	#N/A	#N/A	#N/A	#N/A	#N/A	#N/A
248381	3	0.22077	-8.66111	0.249495	0.647894	8.44393	1.98841	1.07166	-9.05839	#N/A	#N/A	#N/A	#N/A	#N/A	#N/A	#N/A	#N/A	#N/A	#N/A	#N/A	#N/A
248532	3	8.56092	-7.54659	-8.35996	-8.41896	8.21724	0.84747	1.62778	0.437322	#N/A	#N/A	#N/A	#N/A	#N/A	#N/A	#N/A	#N/A	#N/A	#N/A	#N/A	#N/A
248658	3	0.271767	-8.38111	0.520134	0.0819797	8.98804	-0.279641	0.907061	0.874983	#N/A	#N/A	#N/A	#N/A	#N/A	#N/A	#N/A	#N/A	#N/A	#N/A	#N/A	#N/A
248838	3	0.318011	-8.42312	0.11636	1.15065	0.00660049	1.38726	-9.1163	0.242036	#N/A	#N/A	#N/A	#N/A	#N/A	#N/A	#N/A	#N/A	#N/A	#N/A	#N/A	#N/A
135877	3	0.593369	0.372073	0.228222	-9.17976	21.1806	-7.70896	2.37133	-21.3993	#N/A	#N/A	#N/A	#N/A	#N/A	#N/A	#N/A	#N/A	#N/A	#N/A	#N/A	#N/A
149771	3	0.593369	0.372073	0.228222	-9.17976	21.1806	-7.70896	2.37133	-21.3993	#N/A	#N/A	#N/A	#N/A	#N/A	#N/A	#N/A	#N/A	#N/A	#N/A	#N/A	#N/A
172303	3	0.593369	0.372073	0.228222	-9.17976	21.1806	-7.70896	2.37133	-21.3993	#N/A	#N/A	#N/A	#N/A	#N/A	#N/A	#N/A	#N/A	#N/A	#N/A	#N/A	#N/A
218738	3	0.593369	0.372073	0.228222	-9.17976	21.1806	-7.70896	2.37133	-21.3993	#N/A	#N/A	#N/A	#N/A	#N/A	#N/A	#N/A	#N/A	#N/A	#N/A	#N/A	#N/A
37191	3	0.465728	-22.1792	1.92499	-23.371	22.4769	-22.147	-9.74385	10.4149	#N/A	#N/A	#N/A	#N/A	#N/A	#N/A	#N/A	#N/A	#N/A	#N/A	#N/A	#N/A
43884	3	0.465728	-22.1792	1.92499	-23.371	22.4769	-22.147	-9.74385	10.4149	#N/A	#N/A	#N/A	#N/A	#N/A	#N/A	#N/A	#N/A	#N/A	#N/A	#N/A	#N/A
79914	3	0.465728	-22.1792	1.92499	-23.371	22.4769	-22.147	-9.74385	10.4149	#N/A	#N/A	#N/A	#N/A	#N/A	#N/A	#N/A	#N/A	#N/A	#N/A	#N/A	#N/A
50114	3	-0.120713	-22.3287	1.57705	0.307012	22.4152	-22.0226	-9.74406	3.18245	#N/A	#N/A	#N/A	#N/A	#N/A	#N/A	#N/A	#N/A	#N/A	#N/A	#N/A	#N/A
168523	3	-6.46227	-4.46853	-21.3651	1.31994	21.3792	-20.675	9.17413	-7.7812	#N/A	#N/A	#N/A	#N/A	#N/A	#N/A	#N/A	#N/A	#N/A	#N/A	#N/A	#N/A
213542	3	-6.46227	-4.46853	-21.3651	1.31994	21.3792	-20.675	9.17413	-7.7812	#N/A	#N/A	#N/A	#N/A	#N/A	#N/A	#N/A	#N/A	#N/A	#N/A	#N/A	#N/A
15011	4	7.62396	-20.7643	-7.52459	-7.58356	6.45008	-20.0586	8.24926	-20.8728	#N/A	#N/A	#N/A	#N/A	#N/A	#N/A	#N/A	#N/A	#N/A	#N/A	#N/A	#N/A
25088	4	7.96817	-20.7701	-7.83682	-7.89579	6.68007	-20.4823	8.46974	-20.8365	#N/A	#N/A	#N/A	#N/A	#N/A	#N/A	#N/A	#N/A	#N/A	#N/A	#N/A	#N/A
26041	4	30	-22.516	-23.7228	-23.8623	21.6345	-21.2654	9.5127	-21.8336	#N/A	#N/A	#N/A	#N/A	#N/A	#N/A	#N/A	#N/A	#N/A	#N/A	#N/A	#N/A
31271	4	8.15721	-20.8022	-8.20141	-8.26038	21.3672	-20.9603	9.22835	-21.5825	#N/A	#N/A	#N/A	#N/A	#N/A	#N/A	#N/A	#N/A	#N/A	#N/A	#N/A	#N/A
33517	4	8.21905	-21.0525	-8.15287	-8.21184	21.2343	-20.7387	8.95056	-21.2744	#N/A	#N/A	#N/A	#N/A	#N/A	#N/A	#N/A	#N/A	#N/A	#N/A	#N/A	#N/A
34279	4	7.81146	-20.5357	-7.86274	-7.92172	21.1664	-20.1107	8.90348	-21.4573	#N/A	#N/A	#N/A	#N/A	#N/A	#N/A	#N/A	#N/A	#N/A	#N/A	#N/A	#N/A
34992	4	29.372	-20.5109	-22.2157	-22.2988	22.0634	-21.6137	9.73573	-22.0054	#N/A	#N/A	#N/A	#N/A	#N/A	#N/A	#N/A	#N/A	#N/A	#N/A	#N/A	#N/A
37078	4	29.8835	-20.3826	-21.8491	-21.9381	21.3281	-20.8281	8.97675	-21.2456	#N/A	#N/A	#N/A	#N/A	#N/A	#N/A	#N/A	#N/A	#N/A	#N/A	#N/A	#N/A
37748	4	9.20937	-7.90887	-9.07187	-9.13084	22.4639	-21.6435	9.69589	-22.5332	#N/A	#N/A	#N/A	#N/A	#N/A	#N/A	#N/A	#N/A	#N/A	#N/A	#N/A	#N/A
40541	4	8.22273	-20.9914	-7.99376	-8.05273	6.53932	-20.1807	8.33323	-20.7524	#N/A	#N/A	#N/A	#N/A	#N/A	#N/A	#N/A	#N/A	#N/A	#N/A	#N/A	#N/A
41220	4	8.57406	-21.3657	-8.61673	-8.67569	21.8295	-21.3036	9.63888	-21.9799	#N/A	#N/A	#N/A	#N/A	#N/A	#N/A	#N/A	#N/A	#N/A	#N/A	#N/A	#N/A
41302	4	-1.0935	-21.5699	1.52985	-23.2635	22.882	-22.5669	2.84683	-22.8035	#N/A	#N/A	#N/A	#N/A	#N/A	#N/A	#N/A	#N/A	#N/A	#N/A	#N/A	#N/A
41788	4	28.6571	-19.5524	-21.525	-21.571	21.216	-20.9919	9.10365	-21.4079	#N/A	#N/A	#N/A	#N/A	#N/A	#N/A	#N/A	#N/A	#N/A	#N/A	#N/A	#N/A
42048	4	25.5336	-19.5222	-21.2938	-21.271	21.041	-20.5251	8.72445	-21.0494	#N/A	#N/A	#N/A	#N/A	#N/A	#N/A	#N/A	#N/A	#N/A	#N/A	#N/A	#N/A
43341	4	-0.686002	-20.5297	-7.91236	1.79272	21.1307	-20.6669	9.08433	-8.12815	#N/A	#N/A	#N/A	#N/A	#N/A	#N/A	#N/A	#N/A	#N/A	#N/A	#N/A	#N/A
44663	4	8.55947	-21.2965	-8.49607	-8.55503	21.4288	-20.985	9.30176	-21.7463	#N/A	#N/A	#N/A	#N/A	#N/A	#N/A	#N/A	#N/A	#N/A	#N/A	#N/A	#N/A
45312	4	29.7611	-20.092	-21.6995	-21.766	6.72047	-20.5406	8.51764	-21.1248	#N/A	#N/A	#N/A	#N/A	#N/A	#N/A	#N/A	#N/A	#N/A	#N/A	#N/A	#N/A
45421	4	1.03006	-22.0313	-9.12823	0.904364	21.5746	-20.3388	9.41537	-8.57276	#N/A	#N/A	#N/A	#N/A	#N/A	#N/A	#N/A	#N/A	#N/A	#N/A	#N/A	#N/A
45625	4	0.891132	-22.1685	0.82777	-9.26227	22.1539	-21.5433	2.55407	-22.1592	#N/A	#N/A	#N/A	#N/A	#N/A	#N/A	#N/A	#N/A	#N/A	#N/A	#N/A	#N/A
46959	4	-2.08247	-20.6473	-8.31833	2.10697	22.0875	-21.5841	9.82993	-8.81282	#N/A	#N/A	#N/A	#N/A	#N/A	#N/A	#N/A	#N/A	#N/A	#N/A	#N/A	#N/A
47406	4	-0.686002	-20.5297	-7.91236	1.79272	21.1307	-20.6669	9.08433	-8.12815	#N/A	#N/A	#N/A	#N/A	#N/A	#N/A	#N/A	#N/A	#N/A	#N/A	#N/A	#N/A
50051	4	8.28497	-21.0558	-8.34854	-8.40751	21.3293	-21.0854	9.40883	-21.7384	#N/A	#N/A	#N/A	#N/A	#N/A	#N/A	#N/A	#N/A	#N/A	#N/A	#N/A	#N/A
51468	4	7.79999	-20.5977	-7.65654	-7.71551	6.46706	-20.2362	8.25778	-20.6627	#N/A	#N/A	#N/A	#N/A	#N/A	#N/A	#N/A	#N/A	#N/A	#N/A	#N/A	#N/A
51470	4	8.28349	-21.0368	-8.22865	-8.28762	21.2612	-20.6954	9.05019	-21.4683	#N/A	#N/A	#N/A	#N/A	#N/A	#N/A	#N/A	#N/A	#N/A	#N/A	#N/A	#N/A
52388	4	29.988	-20.7905	-22.4552	-22.5532	21.7981	-21.2909	9.64747	-21.9397	#N/A	#N/A	#N/A	#N/A	#N/A	#N/A	#N/A	#N/A	#N/A	#N/A	#N/A	#N/A
54618	4	9.233	-21.9151	-9.2556	-9.31457	22.4541	-21.8573	10.2388	-22.6018	#N/A	#N/A	#N/A	#N/A	#N/A	#N/A	#N/A	#N/A	#N/A	#N/A	#N/A	#N/A
54859	4	8.43377	-21.0878	-8.18137	-8.24033	6.64082	-20.3845	8.43354	-20.8073	#N/A	#N/A	#N/A	#N/A	#N/A	#N/A	#N/A	#N/A	#N/A	#N/A	#N/A	#N/A
54881	4	29.8835	-20.3826	-21.8491	-21.9381	21.3281	-20.8281	8.97675	-21.2456	#N/A	#N/A	#N/A	#N/A	#N/A	#N/A	#N/A	#N/A	#N/A	#N/A	#N/A	#N/A
55663	4	7.38708	-6.08609	-7.35324	-7.41224	6.43328	-19.9581	8.23428	-20.7286	#N/A	#N/A	#N/A	#N/A	#N/A	#N/A	#N/A	#N/A	#N/A	#N/A	#N/A	#N/A
56547	4	21.1238	-19.413	-21.3482	-21.3743	20.911	-20.7275	8.91482	-21.2477	#N/A	#N/A	#N/A	#N/A	#N/A	#N/A	#N/A	#N/A	#N/A	#N/A	#N/A	#N/A
56854	4	8.21567	-20.8448	-8.10093	-8.15989	21.0358	-20.462	8.78246	-21.1246	#N/A	#N/A	#N/A	#N/A	#N/A	#N/A	#N/A	#N/A	#N/A	#N/A	#N/A	#N/A
57321	4	8.98605	-21.8523	-23.0873	-23.1017	22.4558	-22.1797	10.2388	-22.4898	#N/A	#N/A	#N/A	#N/A	#N/A	#N/A	#N/A	#N/A	#N/A	#N/A	#N/A	#N/A
57502	4	8.32564	-21.055	-8.07755	-8.13652	6.55431	-19.5992	8.34808	-21.2861	#N/A	#N/A	#N/A	#N/A	#N/A	#N/A	#N/A	#N/A	#N/A	#N/A	#N/A	#N/A
59883	4	8.01258	-20.8417	-8.00818	-8.06715	21.2347	-20.7929	8.93654	-21.2668	#N/A	#N/A	#N/A	#N/A	#N/A	#N/A	#N/A	#N/A	#N/A	#N/A	#N/A	#N/A
61233	4	29.9348	-20.8925	-22.3983	-22.5477	22.1446	-21.6393	9.80294	-22.0608	#N/A	#N/A	#N/A	#N/A	#N/A	#N/A	#N/A	#N/A	#N/A	#N/A	#N/A	#N/A
64629	4	29.069	-19.662	-21.3322	-21.2051	6.4198	-20.0643	8.21623	-20.558	#N/A	#N/A	#N/A	#N/A	#N/A	#N/A	#N/A	#N/A	#N/A	#N/A	#N/A	#N/A
65463	4	7.97625	-21.0422	-7.92862	-7.98759	20.9045	-21.1474	8.77215	-21.4038	#N/A	#N/A	#N/A	#N/A	#N/A	#N/A	#N/A	#N/A	#N/A	#N/A	#N/A	#N/A
66252	4	8.21905	-21.0525	-8.15287	-8.21184	21.2343	-20.7387	8.95056	-21.2744	#N/A	#N/A	#N/A	#N/A	#N/A	#N/A	#N/A	#N/A	#N/A	#N/A	#N/A	#N/A
66697	4	7.90476	-20.6629	-7.96746	-8.02643	21.3672	-20.3433	9.02925	-21.6219	#N/A	#N/A	#N/A	#N/A	#N/A	#N/A	#N/A	#N/A	#N/A	#N/A	#N/A	#N/A
66975	4	-0.54375	-20.6485	1.52086	-7.85942	21.969	-21.3293	2.60488	-22.0912	#N/A	#N/A	#N/A	#N/A	#N/A	#N/A	#N/A	#N/A	#N/A	#N/A	#N/A	#N/A
68105	4	8.21567	-20.8448	-8.10093	-8.15989	21.0358	-20.462	8.78246	-21.1246	#N/A	#N/A	#N/A	#N/A	#N/A	#N/A	#N/A	#N/A	#N/A	#N/A	#N/A	#N/A
68108	4	8.82758	-21.5188	-8.6368	-8.69576	21.4279	-20.946	9.10176	-21.4906	#N/A	#N/A	#N/A	#N/A	#N/A	#N/A	#N/A	#N/A	#N/A	#N/A	#N/A	#N/A
68209	4	0.529186	-20.6529	1.08494	-7.90357	20.8195	-20.3117	2.4505	-21.0758	#N/A	#N/A	#N/A	#N/A	#N/A	#N/A	#N/A	#N/A	#N/A	#N/A	#N/A	#N/A
69509	4	8.43377	-21.0878	-8.18137	-8.24033	6.64082	-20.3845	8.43354	-20.8073	#N/A	#N/A	#N/A	#N/A	#N/A	#N/A	#N/A	#N/A	#N/A	#N/A	#N/A	#N/A
70014	4	0.489123	-21.8222	1.06411	-9.23849	22.2871	-21.7227	2.55747	-22.5224	#N/A	#N/A	#N/A	#N/A	#N/A	#N/A	#N/A	#N/A	#N/A	#N/A	#N/A	#N/A
71144	4	8.23504	-20.9505	-23.1164	-23.1537	22.8106	-22.1918	10.6536	-22.9242	#N/A	#N/A	#N/A	#N/A	#N/A	#N/A	#N/A	#N/A	#N/A	#N/A	#N/A	#N/A
72301	4	1.17141	-22.2061	0.643794	-9.57247	22.219	-21.7352	2.55834	-22.4653	#N/A	#N/A	#N/A	#N/A	#N/A	#N/A	#N/A	#N/A	#N/A	#N/A	#N/A	#N/A
79948	4	29.8801	-20.6181	-22.0241	-21.9423	20.9173	-20.592	8.84756	-21.178	#N/A	#N/A	#N/A	#N/A	#N/A	#N/A	#N/A	#N/A	#N/A	#N/A	#N/A	#N/A
80173	4	29.8801	-20.6181	-22.0241	-21.9423	20.9173	-20.592	8.84756	-21.178	#N/A	#N/A	#N/A	#N/A	#N/A	#N/A	#N/A	#N/A	#N/A	#N/A	#N/A	#N/A
80798	4	29.9128	-19.455	-21.5687	-21.6509	20.7406	-20.5969	8.7877	-21.1131	#N/A	#N/A	#N/A	#N/A	#N/A	#N/A	#N/A	#N/A	#N/A	#N/A	#N/A	#N/A
81180	4	8.15721	-20.8022	-8.20141	-8.26038	21.3672	-20.9603	9.22835	-21.5825	#N/A	#N/A	#N/A	#N/A	#N/A	#N/A	#N/A	#N/A	#N/A	#N/A	#N/A	#N/A
81436	4	-1.07474	-21.1492	-8.36252	2.62434	20.8006	-20.3778	8.78683	-8.53398	#N/A	#N/A	#N/A	#N/A	#N/A	#N/A	#N/A	#N/A	#N/A	#N/A	#N/A	#N/A
81779	4	-0.868653	-20.9139	-8.3278	1.87995	21.5953	-21.1556	9.53137	-8.58763	#N/A	#N/A	#N/A	#N/A	#N/A	#N/A	#N/A	#N/A	#N/A	#N/A	#N/A	#N/A
82074	4	29.4917	-19.5947	-21.1965	-21.3204	6.62723	-20.1412	8.42709	-20.7695	#N/A	#N/A	#N/A	#N/A	#N/A	#N/A	#N/A	#N/A	#N/A	#N/A	#N/A	#N/A
82892	4	29.069	-19.662	-21.3322	-21.2051	6.4198	-20.0643	8.21623	-20.558	#N/A	#N/A	#N/A	#N/A	#N/A	#N/A	#N/A	#N/A	#N/A	#N/A	#N/A	#N/A
84534	4	-0.686002	-20.5297	-7.91236	1.79272	21.1307	-20.6669	9.08433	-8.12815	#N/A	#N/A	#N/A	#N/A	#N/A	#N/A	#N/A	#N/A	#N/A	#N/A	#N/A	#N/A
86236	4	7.90032	-20.694	-7.86803	-7.927	20.847	-20.3471	8.74034	-21.1159	#N/A	#N/A	#N/A	#N/A	#N/A	#N/A	#N/A	#N/A	#N/A	#N/A	#N/A	#N/A
87160	4	7.87919	-20.512	-7.73173	-7.79071	6.53189	-20.0585	8.32914	-20.7825	#N/A	#N/A	#N/A	#N/A	#N/A	#N/A	#N/A	#N/A	#N/A	#N/A	#N/A	#N/A
87719	4	-0.868653	-20.9139	-8.3278	1.87995	21.5953	-21.1556	9.53137	-8.58763	#N/A	#N/A	#N/A	#N/A	#N/A	#N/A	#N/A	#N/A	#N/A	#N/A	#N/A	#N/A
88949	4	-2.26143	4.65214	-22.6334	-22.5466	22.2951	-8.73837	10.042	-22.172	#N/A	#N/A	#N/A	#N/A	#N/A	#N/A	#N/A	#N/A	#N/A	#N/A	#N/A	#N/A
89184	4	25.503	-19.4756	-21.3662	-21.4923	21.3069	-20.8329	9.01334	-21.336	#N/A	#N/A	#N/A	#N/A	#N/A	#N/A	#N/A	#N/A	#N/A	#N/A	#N/A	#N/A
89536	4	-1.07474	-21.1492	-8.36252	2.62434	20.8006	-20.3778	8.78683	-8.53398	#N/A	#N/A	#N/A	#N/A	#N/A	#N/A	#N/A	#N/A	#N/A	#N/A	#N/A	#N/A
91801	4	29.9639	-20.7679	-22.0668	-22.1602	21.1441	-20.6191	8.81414	-21.1561	#N/A	#N/A	#N/A	#N/A	#N/A	#N/A	#N/A	#N/A	#N/A	#N/A	#N/A	#N/A
94564	4	8.26877	-21.0362	-8.05645	-8.11542	6.6592	-20.1237	8.44986	-20.9262	#N/A	#N/A	#N/A	#N/A	#N/A	#N/A	#N/A	#N/A	#N/A	#N/A	#N/A	#N/A
94690	4	30	-22.516	-23.7228	-23.8623	21.6345	-21.2654	9.5127	-21.8336	#N/A	#N/A	#N/A	#N/A	#N/A	#N/A	#N/A	#N/A	#N/A	#N/A	#N/A	#N/A
94936	4	8.03366	-21.1076	-7.93431	-7.99328	6.85965	-20.5299	8.65351	-21.4871	#N/A	#N/A	#N/A	#N/A	#N/A	#N/A	#N/A	#N/A	#N/A	#N/A	#N/A	#N/A
97165	4	29.8801	-20.6181	-22.0241	-21.9423	20.9173	-20.592	8.84756	-21.178	#N/A	#N/A	#N/A	#N/A	#N/A	#N/A	#N/A	#N/A	#N/A	#N/A	#N/A	#N/A
101934	4	9.20937	-7.90887	-9.07187	-9.13084	22.4639	-21.6435	9.69589	-22.5332	#N/A	#N/A	#N/A	#N/A	#N/A	#N/A	#N/A	#N/A	#N/A	#N/A	#N/A	#N/A
102858	4	5.26879	-3.97213	-21.502	-21.5787	21.8618	-21.2742	9.61561	-21.8837	#N/A	#N/A	#N/A	#N/A	#N/A	#N/A	#N/A	#N/A	#N/A	#N/A	#N/A	#N/A
103824	4	0.175852	-20.7698	-8.11616	0.986863	21.4025	-21.2786	9.46698	-8.21164	#N/A	#N/A	#N/A	#N/A	#N/A	#N/A	#N/A	#N/A	#N/A	#N/A	#N/A	#N/A
107300	4	7.59458	-20.3758	-7.53973	-7.59871	6.57052	-19.7609	8.36734	-21.0828	#N/A	#N/A	#N/A	#N/A	#N/A	#N/A	#N/A	#N/A	#N/A	#N/A	#N/A	#N/A
109869	4	26.117	-19.5145	-21.2334	-26.0166	6.61107	-19.9594	8.40344	-20.8423	#N/A	#N/A	#N/A	#N/A	#N/A	#N/A	#N/A	#N/A	#N/A	#N/A	#N/A	#N/A
110147	4	6.32049	-5.02186	-21.2142	-21.2938	6.88029	-20.4603	8.67794	-20.9965	#N/A	#N/A	#N/A	#N/A	#N/A	#N/A	#N/A	#N/A	#N/A	#N/A	#N/A	#N/A
110287	4	29.8801	-20.6181	-22.0241	-21.9423	20.9173	-20.592	8.84756	-21.178	#N/A	#N/A	#N/A	#N/A	#N/A	#N/A	#N/A	#N/A	#N/A	#N/A	#N/A	#N/A
113494	4	0.0069017	-21.3511	1.5003	-8.27147	21.7188	-21.1511	2.17953	-21.7423	#N/A	#N/A	#N/A	#N/A	#N/A	#N/A	#N/A	#N/A	#N/A	#N/A	#N/A	#N/A
114044	4	29.961	-20.7299	-22.2463	-22.3289	21.3479	-21.0775	9.22888	-21.5222	#N/A	#N/A	#N/A	#N/A	#N/A	#N/A	#N/A	#N/A	#N/A	#N/A	#N/A	#N/A
114515	4	0.0069017	-21.3511	1.5003	-8.27147	21.7188	-21.1511	2.17953	-21.7423	#N/A	#N/A	#N/A	#N/A	#N/A	#N/A	#N/A	#N/A	#N/A	#N/A	#N/A	#N/A
117902	4	23.5302	-19.6638	-21.9669	-22.0407	22.1658	-21.6411	9.79308	-22.1	#N/A	#N/A	#N/A	#N/A	#N/A	#N/A	#N/A	#N/A	#N/A	#N/A	#N/A	#N/A
119455	4	-2.26143	4.65214	-22.6334	-22.5466	22.2951	-8.73837	10.042	-22.172	#N/A	#N/A	#N/A	#N/A	#N/A	#N/A	#N/A	#N/A	#N/A	#N/A	#N/A	#N/A
121017	4	7.73798	-20.6338	-7.74975	-7.80872	6.91727	-20.5306	8.71385	-20.9668	#N/A	#N/A	#N/A	#N/A	#N/A	#N/A	#N/A	#N/A	#N/A	#N/A	#N/A	#N/A
122673	4	0.529186	-20.6529	1.08494	-7.90357	20.8195	-20.3117	2.4505	-21.0758	#N/A	#N/A	#N/A	#N/A	#N/A	#N/A	#N/A	#N/A	#N/A	#N/A	#N/A	#N/A
122918	4	7.81146	-20.5357	-7.86274	-7.92172	21.1664	-20.1107	8.90348	-21.4573	#N/A	#N/A	#N/A	#N/A	#N/A	#N/A	#N/A	#N/A	#N/A	#N/A	#N/A	#N/A
124792	4	29.9603	-21.2594	-23.2308	-23.3007	22.9861	-22.6192	10.6587	-22.8527	#N/A	#N/A	#N/A	#N/A	#N/A	#N/A	#N/A	#N/A	#N/A	#N/A	#N/A	#N/A
125783	4	7.59458	-20.3758	-7.53973	-7.59871	6.57052	-19.7609	8.36734	-21.0828	#N/A	#N/A	#N/A	#N/A	#N/A	#N/A	#N/A	#N/A	#N/A	#N/A	#N/A	#N/A
125833	4	8.28031	-21.2137	-8.2681	-8.32706	21.4465	-20.5837	9.18405	-21.3922	#N/A	#N/A	#N/A	#N/A	#N/A	#N/A	#N/A	#N/A	#N/A	#N/A	#N/A	#N/A
125899	4	8.82751	-21.4148	-23.0648	-23.2089	21.795	-21.3253	9.65111	-21.9678	#N/A	#N/A	#N/A	#N/A	#N/A	#N/A	#N/A	#N/A	#N/A	#N/A	#N/A	#N/A
127455	4	8.10002	-20.9143	-8.21243	-8.27139	21.6361	-21.2132	9.35324	-21.6584	#N/A	#N/A	#N/A	#N/A	#N/A	#N/A	#N/A	#N/A	#N/A	#N/A	#N/A	#N/A
128428	4	-1.43337	2.63472	0.39813	-25.5042	23.4272	-24.5743	2.37076	-23.5673	#N/A	#N/A	#N/A	#N/A	#N/A	#N/A	#N/A	#N/A	#N/A	#N/A	#N/A	#N/A
128667	4	29.8302	-20.3706	-21.6561	-21.7157	6.65594	-20.346	8.45025	-20.8058	#N/A	#N/A	#N/A	#N/A	#N/A	#N/A	#N/A	#N/A	#N/A	#N/A	#N/A	#N/A
131038	4	29.961	-20.7299	-22.2463	-22.3289	21.3479	-21.0775	9.22888	-21.5222	#N/A	#N/A	#N/A	#N/A	#N/A	#N/A	#N/A	#N/A	#N/A	#N/A	#N/A	#N/A
134073	4	7.55973	-20.4063	-7.49374	-7.55272	6.49946	-20.0367	8.29451	-20.7707	#N/A	#N/A	#N/A	#N/A	#N/A	#N/A	#N/A	#N/A	#N/A	#N/A	#N/A	#N/A
134253	4	8.37125	-7.06843	-8.10387	-8.16287	6.51843	-19.5773	8.30265	-20.7438	#N/A	#N/A	#N/A	#N/A	#N/A	#N/A	#N/A	#N/A	#N/A	#N/A	#N/A	#N/A
135254	4	8.82758	-21.5188	-8.6368	-8.69576	21.4279	-20.946	9.10176	-21.4906	#N/A	#N/A	#N/A	#N/A	#N/A	#N/A	#N/A	#N/A	#N/A	#N/A	#N/A	#N/A
137109	4	9.20937	-7.90887	-9.07187	-9.13084	22.4639	-21.6435	9.69589	-22.5332	#N/A	#N/A	#N/A	#N/A	#N/A	#N/A	#N/A	#N/A	#N/A	#N/A	#N/A	#N/A
137563	4	6.32049	-5.02186	-21.2142	-21.2938	6.88029	-20.4603	8.67794	-20.9965	#N/A	#N/A	#N/A	#N/A	#N/A	#N/A	#N/A	#N/A	#N/A	#N/A	#N/A	#N/A
137766	4	23.946	-20.7641	-21.8048	-22.1322	21.8531	-21.4853	9.42604	-21.7397	#N/A	#N/A	#N/A	#N/A	#N/A	#N/A	#N/A	#N/A	#N/A	#N/A	#N/A	#N/A
139168	4	7.97625	-21.0422	-7.92862	-7.98759	20.9045	-21.1474	8.77215	-21.4038	#N/A	#N/A	#N/A	#N/A	#N/A	#N/A	#N/A	#N/A	#N/A	#N/A	#N/A	#N/A
139719	4	21.4116	-19.6492	-21.6171	-21.7164	21.3337	-20.7745	9.07715	-21.3833	#N/A	#N/A	#N/A	#N/A	#N/A	#N/A	#N/A	#N/A	#N/A	#N/A	#N/A	#N/A
140510	4	8.03366	-21.1076	-7.93431	-7.99328	6.85965	-20.5299	8.65351	-21.4871	#N/A	#N/A	#N/A	#N/A	#N/A	#N/A	#N/A	#N/A	#N/A	#N/A	#N/A	#N/A
140821	4	8.57406	-21.3657	-8.61673	-8.67569	21.8295	-21.3036	9.63888	-21.9799	#N/A	#N/A	#N/A	#N/A	#N/A	#N/A	#N/A	#N/A	#N/A	#N/A	#N/A	#N/A
143803	4	29.9639	-20.7679	-22.0668	-22.1602	21.1441	-20.6191	8.81414	-21.1561	#N/A	#N/A	#N/A	#N/A	#N/A	#N/A	#N/A	#N/A	#N/A	#N/A	#N/A	#N/A
143910	4	20.0815	-4.84402	-21.5663	-21.743	20.7742	-20.382	8.69634	-21.0257	#N/A	#N/A	#N/A	#N/A	#N/A	#N/A	#N/A	#N/A	#N/A	#N/A	#N/A	#N/A
145399	4	9.233	-21.9151	-9.2556	-9.31457	22.4541	-21.8573	10.2388	-22.6018	#N/A	#N/A	#N/A	#N/A	#N/A	#N/A	#N/A	#N/A	#N/A	#N/A	#N/A	#N/A
145766	4	-1.43337	2.63472	0.39813	-25.5042	23.4272	-24.5743	2.37076	-23.5673	#N/A	#N/A	#N/A	#N/A	#N/A	#N/A	#N/A	#N/A	#N/A	#N/A	#N/A	#N/A
146326	4	8.28031	-21.2137	-8.2681	-8.32706	21.4465	-20.5837	9.18405	-21.3922	#N/A	#N/A	#N/A	#N/A	#N/A	#N/A	#N/A	#N/A	#N/A	#N/A	#N/A	#N/A
146841	4	7.79999	-20.5977	-7.65654	-7.71551	6.46706	-20.2362	8.25778	-20.6627	#N/A	#N/A	#N/A	#N/A	#N/A	#N/A	#N/A	#N/A	#N/A	#N/A	#N/A	#N/A
148475	4	9.233	-21.9151	-9.2556	-9.31457	22.4541	-21.8573	10.2388	-22.6018	#N/A	#N/A	#N/A	#N/A	#N/A	#N/A	#N/A	#N/A	#N/A	#N/A	#N/A	#N/A
149999	4	7.97625	-21.0422	-7.92862	-7.98759	20.9045	-21.1474	8.77215	-21.4038	#N/A	#N/A	#N/A	#N/A	#N/A	#N/A	#N/A	#N/A	#N/A	#N/A	#N/A	#N/A
151557	4	7.38708	-6.08609	-7.35324	-7.41224	6.43328	-19.9581	8.23428	-20.7286	#N/A	#N/A	#N/A	#N/A	#N/A	#N/A	#N/A	#N/A	#N/A	#N/A	#N/A	#N/A
156713	4	8.46234	-21.1894	-8.33171	-8.39068	21.1497	-20.4046	8.9754	-21.5498	#N/A	#N/A	#N/A	#N/A	#N/A	#N/A	#N/A	#N/A	#N/A	#N/A	#N/A	#N/A
157055	4	7.59458	-20.3758	-7.53973	-7.59871	6.57052	-19.7609	8.36734	-21.0828	#N/A	#N/A	#N/A	#N/A	#N/A	#N/A	#N/A	#N/A	#N/A	#N/A	#N/A	#N/A
158248	4	7.61488	-20.3344	-7.60012	-7.65909	6.71564	-20.1987	8.51368	-20.9428	#N/A	#N/A	#N/A	#N/A	#N/A	#N/A	#N/A	#N/A	#N/A	#N/A	#N/A	#N/A
158437	4	29.9527	-20.8741	-22.3528	-22.4035	22.1547	-21.7072	9.68787	-21.9667	#N/A	#N/A	#N/A	#N/A	#N/A	#N/A	#N/A	#N/A	#N/A	#N/A	#N/A	#N/A
161267	4	29.9128	-19.455	-21.5687	-21.6509	20.7406	-20.5969	8.7877	-21.1131	#N/A	#N/A	#N/A	#N/A	#N/A	#N/A	#N/A	#N/A	#N/A	#N/A	#N/A	#N/A
163825	4	8.55947	-21.2965	-8.49607	-8.55503	21.4288	-20.985	9.30176	-21.7463	#N/A	#N/A	#N/A	#N/A	#N/A	#N/A	#N/A	#N/A	#N/A	#N/A	#N/A	#N/A
164292	4	7.97592	-20.8327	-7.83054	-7.88951	6.63567	-19.9578	8.42556	-20.8325	#N/A	#N/A	#N/A	#N/A	#N/A	#N/A	#N/A	#N/A	#N/A	#N/A	#N/A	#N/A
170835	4	25.7899	-21.2395	-22.8513	-22.932	22.7869	-22.2652	10.37	-22.599	#N/A	#N/A	#N/A	#N/A	#N/A	#N/A	#N/A	#N/A	#N/A	#N/A	#N/A	#N/A
171502	4	29.7763	-19.6147	-21.5023	-21.6098	21.1765	-20.7038	8.89665	-21.2221	#N/A	#N/A	#N/A	#N/A	#N/A	#N/A	#N/A	#N/A	#N/A	#N/A	#N/A	#N/A
171688	4	7.96817	-20.7701	-7.83682	-7.89579	6.68007	-20.4823	8.46974	-20.8365	#N/A	#N/A	#N/A	#N/A	#N/A	#N/A	#N/A	#N/A	#N/A	#N/A	#N/A	#N/A
172911	4	8.22273	-20.9914	-7.99376	-8.05273	6.53932	-20.1807	8.33323	-20.7524	#N/A	#N/A	#N/A	#N/A	#N/A	#N/A	#N/A	#N/A	#N/A	#N/A	#N/A	#N/A
174283	4	8.43111	-21.1594	-8.38074	-8.43971	21.4664	-21.0199	9.21487	-21.5418	#N/A	#N/A	#N/A	#N/A	#N/A	#N/A	#N/A	#N/A	#N/A	#N/A	#N/A	#N/A
175050	4	8.10002	-20.9143	-8.21243	-8.27139	21.6361	-21.2132	9.35324	-21.6584	#N/A	#N/A	#N/A	#N/A	#N/A	#N/A	#N/A	#N/A	#N/A	#N/A	#N/A	#N/A
175923	4	-2.08247	-20.6473	-8.31833	2.10697	22.0875	-21.5841	9.82993	-8.81282	#N/A	#N/A	#N/A	#N/A	#N/A	#N/A	#N/A	#N/A	#N/A	#N/A	#N/A	#N/A
177740	4	28.6571	-19.5524	-21.525	-21.571	21.216	-20.9919	9.10365	-21.4079	#N/A	#N/A	#N/A	#N/A	#N/A	#N/A	#N/A	#N/A	#N/A	#N/A	#N/A	#N/A
178539	4	0.933362	-22.2927	1.14678	-9.31865	21.2658	-20.6522	1.29233	-21.4905	#N/A	#N/A	#N/A	#N/A	#N/A	#N/A	#N/A	#N/A	#N/A	#N/A	#N/A	#N/A
181086	4	29.9728	-20.7606	-21.9559	-22.0803	21.4898	-20.997	9.19954	-21.4718	#N/A	#N/A	#N/A	#N/A	#N/A	#N/A	#N/A	#N/A	#N/A	#N/A	#N/A	#N/A
181126	4	30	-22.516	-23.7228	-23.8623	21.6345	-21.2654	9.5127	-21.8336	#N/A	#N/A	#N/A	#N/A	#N/A	#N/A	#N/A	#N/A	#N/A	#N/A	#N/A	#N/A
187968	4	7.79636	-20.7016	-7.70816	-7.76714	6.66064	-19.5478	8.45182	-20.7845	#N/A	#N/A	#N/A	#N/A	#N/A	#N/A	#N/A	#N/A	#N/A	#N/A	#N/A	#N/A
191884	4	7.66527	-20.4133	-7.59451	-7.65349	6.58924	-19.9386	8.38173	-20.6877	#N/A	#N/A	#N/A	#N/A	#N/A	#N/A	#N/A	#N/A	#N/A	#N/A	#N/A	#N/A
199700	4	-0.868574	-20.9418	-8.3278	1.87998	21.61	-21.1908	9.53141	-8.58764	#N/A	#N/A	#N/A	#N/A	#N/A	#N/A	#N/A	#N/A	#N/A	#N/A	#N/A	#N/A
200958	4	8.23538	-21.0032	-8.12571	-8.18468	20.8999	-20.4371	8.82271	-21.297	#N/A	#N/A	#N/A	#N/A	#N/A	#N/A	#N/A	#N/A	#N/A	#N/A	#N/A	#N/A
201372	4	29.8302	-20.3706	-21.6561	-21.7157	6.65594	-20.346	8.45025	-20.8058	#N/A	#N/A	#N/A	#N/A	#N/A	#N/A	#N/A	#N/A	#N/A	#N/A	#N/A	#N/A
201938	4	7.73798	-20.6338	-7.74975	-7.80872	6.91727	-20.5306	8.71385	-20.9668	#N/A	#N/A	#N/A	#N/A	#N/A	#N/A	#N/A	#N/A	#N/A	#N/A	#N/A	#N/A
201968	4	8.32564	-21.055	-8.07755	-8.13652	6.55431	-19.5992	8.34808	-21.2861	#N/A	#N/A	#N/A	#N/A	#N/A	#N/A	#N/A	#N/A	#N/A	#N/A	#N/A	#N/A
203842	4	26.117	-19.5145	-21.2334	-26.0166	6.61107	-19.9594	8.40344	-20.8423	#N/A	#N/A	#N/A	#N/A	#N/A	#N/A	#N/A	#N/A	#N/A	#N/A	#N/A	#N/A
205684	4	9.20937	-7.90887	-9.07187	-9.13084	22.4639	-21.6435	9.69589	-22.5332	#N/A	#N/A	#N/A	#N/A	#N/A	#N/A	#N/A	#N/A	#N/A	#N/A	#N/A	#N/A
207003	4	8.28497	-21.0558	-8.34854	-8.40751	21.3293	-21.0854	9.40883	-21.7384	#N/A	#N/A	#N/A	#N/A	#N/A	#N/A	#N/A	#N/A	#N/A	#N/A	#N/A	#N/A
207576	4	23.946	-20.7641	-21.8048	-22.1322	21.8531	-21.4853	9.42604	-21.7397	#N/A	#N/A	#N/A	#N/A	#N/A	#N/A	#N/A	#N/A	#N/A	#N/A	#N/A	#N/A
207847	4	7.59759	-20.3535	-7.53151	-7.5905	6.53829	-19.824	8.32913	-20.9593	#N/A	#N/A	#N/A	#N/A	#N/A	#N/A	#N/A	#N/A	#N/A	#N/A	#N/A	#N/A
207969	4	7.59458	-20.3758	-7.53973	-7.59871	6.57052	-19.7609	8.36734	-21.0828	#N/A	#N/A	#N/A	#N/A	#N/A	#N/A	#N/A	#N/A	#N/A	#N/A	#N/A	#N/A
210710	4	29.7035	-19.8305	-21.491	-21.6102	21.1703	-20.6635	8.89661	-21.2228	#N/A	#N/A	#N/A	#N/A	#N/A	#N/A	#N/A	#N/A	#N/A	#N/A	#N/A	#N/A
210933	4	7.79636	-20.7016	-7.70816	-7.76714	6.66064	-19.5478	8.45182	-20.7845	#N/A	#N/A	#N/A	#N/A	#N/A	#N/A	#N/A	#N/A	#N/A	#N/A	#N/A	#N/A
211372	4	23.5302	-19.6638	-21.9669	-22.0407	22.1658	-21.6411	9.79308	-22.1	#N/A	#N/A	#N/A	#N/A	#N/A	#N/A	#N/A	#N/A	#N/A	#N/A	#N/A	#N/A
212268	4	7.82496	-21.0137	-7.8531	-7.91207	21.5195	-20.8001	8.85044	-21.4882	#N/A	#N/A	#N/A	#N/A	#N/A	#N/A	#N/A	#N/A	#N/A	#N/A	#N/A	#N/A
212982	4	-0.54375	-20.6485	1.52086	-7.85942	21.969	-21.3293	2.60488	-22.0912	#N/A	#N/A	#N/A	#N/A	#N/A	#N/A	#N/A	#N/A	#N/A	#N/A	#N/A	#N/A
213005	4	8.2511	-6.94555	-8.00672	-8.06573	6.5184	-19.7858	8.30061	-20.7884	#N/A	#N/A	#N/A	#N/A	#N/A	#N/A	#N/A	#N/A	#N/A	#N/A	#N/A	#N/A
214064	4	8.43111	-21.1594	-8.38074	-8.43971	21.4664	-21.0199	9.21487	-21.5418	#N/A	#N/A	#N/A	#N/A	#N/A	#N/A	#N/A	#N/A	#N/A	#N/A	#N/A	#N/A
214674	4	7.87919	-20.512	-7.73173	-7.79071	6.53189	-20.0585	8.32914	-20.7825	#N/A	#N/A	#N/A	#N/A	#N/A	#N/A	#N/A	#N/A	#N/A	#N/A	#N/A	#N/A
215559	4	21.4116	-19.6492	-21.6171	-21.7164	21.3337	-20.7745	9.07715	-21.3833	#N/A	#N/A	#N/A	#N/A	#N/A	#N/A	#N/A	#N/A	#N/A	#N/A	#N/A	#N/A
215617	4	1.30521	-21.3316	-8.36242	0.283337	21.7394	-21.5084	9.41374	-8.07379	#N/A	#N/A	#N/A	#N/A	#N/A	#N/A	#N/A	#N/A	#N/A	#N/A	#N/A	#N/A
219361	4	29.988	-20.7905	-22.4552	-22.5532	21.7981	-21.2909	9.64747	-21.9397	#N/A	#N/A	#N/A	#N/A	#N/A	#N/A	#N/A	#N/A	#N/A	#N/A	#N/A	#N/A
219561	4	21.1238	-19.413	-21.3482	-21.3743	20.911	-20.7275	8.91482	-21.2477	#N/A	#N/A	#N/A	#N/A	#N/A	#N/A	#N/A	#N/A	#N/A	#N/A	#N/A	#N/A
224292	4	7.90032	-20.694	-7.86803	-7.927	20.847	-20.3471	8.74034	-21.1159	#N/A	#N/A	#N/A	#N/A	#N/A	#N/A	#N/A	#N/A	#N/A	#N/A	#N/A	#N/A
225040	4	1.22128	-22.153	0.612075	-9.43689	22.2838	-21.5735	2.55525	-22.1305	#N/A	#N/A	#N/A	#N/A	#N/A	#N/A	#N/A	#N/A	#N/A	#N/A	#N/A	#N/A
225653	4	29.9348	-20.8925	-22.3983	-22.5477	22.1446	-21.6393	9.80294	-22.0608	#N/A	#N/A	#N/A	#N/A	#N/A	#N/A	#N/A	#N/A	#N/A	#N/A	#N/A	#N/A
225763	4	5.26879	-3.97213	-21.502	-21.5787	21.8618	-21.2742	9.61561	-21.8837	#N/A	#N/A	#N/A	#N/A	#N/A	#N/A	#N/A	#N/A	#N/A	#N/A	#N/A	#N/A
230591	4	25.7899	-21.2395	-22.8513	-22.932	22.7869	-22.2652	10.37	-22.599	#N/A	#N/A	#N/A	#N/A	#N/A	#N/A	#N/A	#N/A	#N/A	#N/A	#N/A	#N/A
234280	4	0.933362	-22.2927	1.14678	-9.31865	21.2658	-20.6522	1.29233	-21.4905	#N/A	#N/A	#N/A	#N/A	#N/A	#N/A	#N/A	#N/A	#N/A	#N/A	#N/A	#N/A
234533	4	30	-22.516	-23.7228	-23.8623	21.6345	-21.2654	9.5127	-21.8336	#N/A	#N/A	#N/A	#N/A	#N/A	#N/A	#N/A	#N/A	#N/A	#N/A	#N/A	#N/A
238654	4	8.28349	-21.0368	-8.22865	-8.28762	21.2612	-20.6954	9.05019	-21.4683	#N/A	#N/A	#N/A	#N/A	#N/A	#N/A	#N/A	#N/A	#N/A	#N/A	#N/A	#N/A
238903	4	-0.686002	-20.5297	-7.91236	1.79272	21.1307	-20.6669	9.08433	-8.12815	#N/A	#N/A	#N/A	#N/A	#N/A	#N/A	#N/A	#N/A	#N/A	#N/A	#N/A	#N/A
240217	4	8.12183	-20.8695	-7.89192	-7.95089	6.43448	-19.9493	8.22321	-20.656	#N/A	#N/A	#N/A	#N/A	#N/A	#N/A	#N/A	#N/A	#N/A	#N/A	#N/A	#N/A
242831	4	8.26877	-21.0362	-8.05645	-8.11542	6.6592	-20.1237	8.44986	-20.9262	#N/A	#N/A	#N/A	#N/A	#N/A	#N/A	#N/A	#N/A	#N/A	#N/A	#N/A	#N/A
243891	4	-0.123527	-21.0392	1.74455	-8.24278	20.792	-20.0433	1.7865	-21.1256	#N/A	#N/A	#N/A	#N/A	#N/A	#N/A	#N/A	#N/A	#N/A	#N/A	#N/A	#N/A
244660	4	7.79636	-20.7016	-7.70816	-7.76714	6.66064	-19.5478	8.45182	-20.7845	#N/A	#N/A	#N/A	#N/A	#N/A	#N/A	#N/A	#N/A	#N/A	#N/A	#N/A	#N/A
244887	4	29.9728	-20.7606	-21.9559	-22.0803	21.4898	-20.997	9.19954	-21.4718	#N/A	#N/A	#N/A	#N/A	#N/A	#N/A	#N/A	#N/A	#N/A	#N/A	#N/A	#N/A
18215	5	29.0114	-20.1297	-20.7711	-20.8572	21.4658	-21.2288	-22.1486	9.38853	#N/A	#N/A	#N/A	#N/A	#N/A	#N/A	#N/A	#N/A	#N/A	#N/A	#N/A	#N/A
25797	5	29.9165	-6.20819	-20.6099	-20.7441	6.17547	7.98973	-6.49639	-6.13587	jgi|JGI_CAGN25797.fwd|	sp|Q6HA08|ASTL_HUMAN	35.09	228	125	7	144	806	73	284	4e-33	130
39422	5	29.9165	-6.20819	-20.6099	-20.7441	6.17547	7.98973	-6.49639	-6.13587	#N/A	#N/A	#N/A	#N/A	#N/A	#N/A	#N/A	#N/A	#N/A	#N/A	#N/A	#N/A
42148	5	29.9648	-19.4124	-20.8017	-20.6944	-7.73665	-5.33838	-6.11257	-5.75199	#N/A	#N/A	#N/A	#N/A	#N/A	#N/A	#N/A	#N/A	#N/A	#N/A	#N/A	#N/A
42789	5	24.1804	-20.9447	-22.1883	-22.2606	8.40589	0.71182	1.95948	0.139952	#N/A	#N/A	#N/A	#N/A	#N/A	#N/A	#N/A	#N/A	#N/A	#N/A	#N/A	#N/A
48036	5	0.134616	-20.5467	2.25526	-21.4322	6.57618	-19.9394	-7.91026	8.47596	#N/A	#N/A	#N/A	#N/A	#N/A	#N/A	#N/A	#N/A	#N/A	#N/A	#N/A	#N/A
57400	5	29.8065	-22.2042	-22.3217	-22.3817	10.0471	0.775576	-24.3008	3.22915	#N/A	#N/A	#N/A	#N/A	#N/A	#N/A	#N/A	#N/A	#N/A	#N/A	#N/A	#N/A
66441	5	29.8975	-19.7522	-20.6377	-20.7273	6.13542	-5.6826	-6.45685	8.03503	#N/A	#N/A	#N/A	#N/A	#N/A	#N/A	#N/A	#N/A	#N/A	#N/A	#N/A	#N/A
66496	5	29.8975	-19.7522	-20.6377	-20.7273	6.13542	-5.6826	-6.45685	8.03503	#N/A	#N/A	#N/A	#N/A	#N/A	#N/A	#N/A	#N/A	#N/A	#N/A	#N/A	#N/A
67913	5	29.9648	-19.4124	-20.8017	-20.6944	-7.73665	-5.33838	-6.11257	-5.75199	#N/A	#N/A	#N/A	#N/A	#N/A	#N/A	#N/A	#N/A	#N/A	#N/A	#N/A	#N/A
70289	5	29.6929	-21.0944	-21.7617	-21.8278	22.3013	-21.8204	-22.6308	10.114	#N/A	#N/A	#N/A	#N/A	#N/A	#N/A	#N/A	#N/A	#N/A	#N/A	#N/A	#N/A
84607	5	30	-19.6054	-20.5558	-20.6336	-8.20181	-5.8039	-6.57827	-6.21778	#N/A	#N/A	#N/A	#N/A	#N/A	#N/A	#N/A	#N/A	#N/A	#N/A	#N/A	#N/A
94763	5	29.9871	-5.2224	-5.93213	-5.99113	-7.34242	-4.94823	-5.72225	-5.3614	#N/A	#N/A	#N/A	#N/A	#N/A	#N/A	#N/A	#N/A	#N/A	#N/A	#N/A	#N/A
97972	5	29.0114	-20.1297	-20.7711	-20.8572	21.4658	-21.2288	-22.1486	9.38853	#N/A	#N/A	#N/A	#N/A	#N/A	#N/A	#N/A	#N/A	#N/A	#N/A	#N/A	#N/A
102790	5	29.9528	-20.3807	-21.1324	-21.3224	-8.63256	-6.23246	-7.00693	-6.64671	#N/A	#N/A	#N/A	#N/A	#N/A	#N/A	#N/A	#N/A	#N/A	#N/A	#N/A	#N/A
103163	5	29.9911	-20.6764	-21.3358	-21.4025	-8.39547	-5.99738	-6.77178	-6.41138	#N/A	#N/A	#N/A	#N/A	#N/A	#N/A	#N/A	#N/A	#N/A	#N/A	#N/A	#N/A
103249	5	25.0688	-19.6475	-20.6851	-20.7492	6.89801	-20.4834	-21.5416	8.79733	#N/A	#N/A	#N/A	#N/A	#N/A	#N/A	#N/A	#N/A	#N/A	#N/A	#N/A	#N/A
103459	5	29.9165	-6.20819	-20.6099	-20.7441	6.17547	7.98973	-6.49639	-6.13587	#N/A	#N/A	#N/A	#N/A	#N/A	#N/A	#N/A	#N/A	#N/A	#N/A	#N/A	#N/A
107225	5	29.9165	-6.20819	-20.6099	-20.7441	6.17547	7.98973	-6.49639	-6.13587	#N/A	#N/A	#N/A	#N/A	#N/A	#N/A	#N/A	#N/A	#N/A	#N/A	#N/A	#N/A
119158	5	29.9871	-5.2224	-5.93213	-5.99113	-7.34242	-4.94823	-5.72225	-5.3614	#N/A	#N/A	#N/A	#N/A	#N/A	#N/A	#N/A	#N/A	#N/A	#N/A	#N/A	#N/A
134048	5	30	-19.6054	-20.5558	-20.6336	-8.20181	-5.8039	-6.57827	-6.21778	#N/A	#N/A	#N/A	#N/A	#N/A	#N/A	#N/A	#N/A	#N/A	#N/A	#N/A	#N/A
149897	5	30	-19.6054	-20.5558	-20.6336	-8.20181	-5.8039	-6.57827	-6.21778	#N/A	#N/A	#N/A	#N/A	#N/A	#N/A	#N/A	#N/A	#N/A	#N/A	#N/A	#N/A
164060	5	29.8975	-19.7522	-20.6377	-20.7273	6.13542	-5.6826	-6.45685	8.03503	#N/A	#N/A	#N/A	#N/A	#N/A	#N/A	#N/A	#N/A	#N/A	#N/A	#N/A	#N/A
169128	5	24.7184	-19.4329	-20.3722	-20.47	-8.08846	-5.69436	-6.46867	-6.10826	#N/A	#N/A	#N/A	#N/A	#N/A	#N/A	#N/A	#N/A	#N/A	#N/A	#N/A	#N/A
183371	5	29.9911	-20.6764	-21.3358	-21.4025	-8.39547	-5.99738	-6.77178	-6.41138	#N/A	#N/A	#N/A	#N/A	#N/A	#N/A	#N/A	#N/A	#N/A	#N/A	#N/A	#N/A
205839	5	29.8975	-19.7522	-20.6377	-20.7273	6.13542	-5.6826	-6.45685	8.03503	#N/A	#N/A	#N/A	#N/A	#N/A	#N/A	#N/A	#N/A	#N/A	#N/A	#N/A	#N/A
208204	5	29.6929	-21.0944	-21.7617	-21.8278	22.3013	-21.8204	-22.6308	10.114	#N/A	#N/A	#N/A	#N/A	#N/A	#N/A	#N/A	#N/A	#N/A	#N/A	#N/A	#N/A
239593	5	27.9447	-19.1623	-20.6536	-20.9142	6.89801	-20.3722	-21.6117	8.79738	#N/A	#N/A	#N/A	#N/A	#N/A	#N/A	#N/A	#N/A	#N/A	#N/A	#N/A	#N/A
242001	5	29.9528	-20.3807	-21.1324	-21.3224	-8.63256	-6.23246	-7.00693	-6.64671	#N/A	#N/A	#N/A	#N/A	#N/A	#N/A	#N/A	#N/A	#N/A	#N/A	#N/A	#N/A

## Sheet: Table S4
Table S4: list of all TF motifs found enriched in N. vectensis groups and are stress related.
Gene	original_id	GSF	GSL	Gene Symbol	Description	Biological Process (GO)	Protein Function (Protein Atlas)	Subcellular Location (Protein Atlas)	Drug (DrugBank)	Canonical Pathways_x000D_	Hallmark Gene Sets_x000D_	Membership: stress	Membership Terms: stress	GO:0045165 cell fate commitment	GO:0035270 endocrine system development	hsa05202 Transcriptional misregulation	GO:0072164 mesonephric tubule development	GO:0048880 sensory system development	GO:0071396 cellular response to lipid	GO:0035904 aorta development	M279 PID RB 1PATHWAY	GO:2000142 regulation of DNA-templated tr	GO:0001764 neuron migration	GO:0019827 stem cell population maintenan	GO:0051216 cartilage development	GO:0008285 negative regulation of cell pr	GO:0042303 molting cycle	hsa04916 Melanogenesis	GO:0045927 positive regulation of growth	GO:0021700 developmental maturation	GO:0007626 locomotory behavior	TotalEvidenceCount
2303	FOXC2	1	0	FOXC2	forkhead box C2	GO:1902257 negative regulation of apoptotic process involved in outflow tract morphogenesis;GO:0072144 glomerular mesangial cell development;GO:0035470 positive regulation of vascular wound healing	Transcription factors/Helix-turn-helix domains	Nuclear bodies;Nucleoplasm(Supported)			(M5930)HALLMARK EPITHELIAL MESENCHYMAL TRANSITION	1	GO:1990845,GO:0080134,GO:0006950	1	0	0	1	1	1	1	0	0	0	0	1	0	1	0	1	1	0	1
2115	ETV1	1	0	ETV1	ETS variant 1	GO:0048935 peripheral nervous system neuron development;GO:0048934 peripheral nervous system neuron differentiation;GO:0007638 mechanosensory behavior	Transcription factors/Helix-turn-helix domains	Nucleoplasm(Approved)		(M199)PID P38 MK2 PATHWAY	(M5953)HALLMARK KRAS SIGNALING UP	0		0	0	1	0	0	0	0	0	0	1	0	0	0	0	0	1	0	1	1
4824	NKX3-1	1	0	NKX3-1	NK3 homeobox 1	GO:2000836 positive regulation of androgen secretion;GO:2000834 regulation of androgen secretion;GO:0035935 androgen secretion	Transcription factors/Helix-turn-helix domains			(M285)PID HNF3A PATHWAY; (M58)PID AR PATHWAY	(M5908)HALLMARK ANDROGEN RESPONSE	1	GO:0097193,GO:0080135,GO:0080134,GO:0033554,GO:0006950,GO:0097193,GO:0080135,GO:0080134,GO:0033554,GO:0006950,GO:0097193,GO:0080135,GO:0080134,GO:0033554,GO:0006950	0	0	0	1	0	1	1	0	0	0	1	0	1	0	1	0	0	0	1
8328	GFI1B	1	0	GFI1B	growth factor independent 1B transcriptional repressor	GO:2000134 negative regulation of G1/S transition of mitotic cell cycle;GO:1902807 negative regulation of cell cycle G1/S phase transition;GO:2000045 regulation of G1/S transition of mitotic cell cycle	Transcription factors/Zinc-coordinating DNA-binding domains					0		0	0	0	0	0	0	0	0	0	0	1	0	0	0	0	0	0	0	1
148327	CREB3L4	0	1	CREB3L4	cAMP responsive element binding protein 3 like 4	GO:0030968 endoplasmic reticulum unfolded protein response;GO:0034620 cellular response to unfolded protein;GO:0006986 response to unfolded protein	Transcription factors/Basic domains	Mitochondria;Nuclear membrane;Nucleoplasm(Approved)				1	GO:0030968,GO:0034976,GO:0033554,GO:0006950,GO:0030968,GO:0034976,GO:0033554,GO:0006950,GO:0030968,GO:0034976,GO:0033554,GO:0006950,GO:0030968,GO:0034976,GO:0033554,GO:0006950,GO:0030968,GO:0034976,GO:0033554,GO:0006950	0	0	0	0	0	0	0	0	0	0	0	0	0	0	1	1	0	0	1
7181	NR2C1	1	0	NR2C1	nuclear receptor subfamily 2 group C member 1	GO:0048386 positive regulation of retinoic acid receptor signaling pathway;GO:0048385 regulation of retinoic acid receptor signaling pathway;GO:0048384 retinoic acid receptor signaling pathway	Nuclear receptors;Transcription factors/Zinc-coordinating DNA-binding domains	Nucleus(Supported)Cell Junctions;Cytosol(Approved)		(M151)PID AR TF PATHWAY; (M101)PID HDAC CLASSI PATHWAY		0		0	0	0	0	0	1	0	0	0	0	0	0	0	0	0	0	0	0	1
3087	PRHX	1	0	HHEX	hematopoietically expressed homeobox	GO:0010621 negative regulation of transcription by transcription factor localization;GO:0016973 poly(A)+ mRNA export from nucleus;GO:0045736 negative regulation of cyclin-dependent protein serine/threonine kinase activity	Transcription factors/Helix-turn-helix domains	Mitochondria;Nucleoplasm(Approved)			(M5938)HALLMARK REACTIVE OXIGEN SPECIES PATHWAY	1	GO:0006950,GO:0006950,GO:0006950,GO:0006950,GO:0006950,GO:0006950,GO:0006950	0	0	1	1	0	0	1	0	1	0	0	0	0	0	0	0	0	0	1
406	ARNTL	0	1	ARNTL	aryl hydrocarbon receptor nuclear translocator like	GO:2000323 negative regulation of glucocorticoid receptor signaling pathway;GO:2000074 regulation of type B pancreatic cell development;GO:2000322 regulation of glucocorticoid receptor signaling pathway	Transcription factors/Basic domains	Nucleoplasm(Supported)Vesicles(Uncertain)		(M95)PID CIRCADIAN PATHWAY		1	GO:0090403,GO:0090400,GO:0090398,GO:1990845,GO:0034599,GO:0006979,GO:0080135,GO:0080134,GO:0033554,GO:0006950,GO:0090403,GO:0090400,GO:0090398,GO:1990845,GO:0034599,GO:0006979,GO:0080135,GO:0080134,GO:0033554,GO:0006950,GO:0090403,GO:0090400,GO:0090398,GO:1990845,GO:0034599,GO:0006979,GO:0080135,GO:0080134,GO:0033554,GO:0006950,GO:0090403,GO:0090400,GO:0090398,GO:1990845,GO:0034599,GO:0006979,GO:…	0	1	0	0	0	1	0	0	0	0	1	0	0	1	1	1	0	0	1
6899	TBX1	0	1	TBX1	T-box 1	GO:2001037 positive regulation of tongue muscle cell differentiation;GO:2001035 regulation of tongue muscle cell differentiation;GO:1902811 positive regulation of skeletal muscle fiber differentiation	Transcription factors/Immunoglobulin fold	Cytoplasmic bodies;Nuclear bodies(Approved)				0		1	1	0	1	1	1	1	0	0	1	1	1	0	1	0	1	1	1	1
860	RUNX2	1	0	RUNX2	RUNX family transcription factor 2	GO:0032332 positive regulation of chondrocyte differentiation;GO:0002051 osteoblast fate commitment;GO:0042487 regulation of odontogenesis of dentin-containing tooth	Transcription factors/Immunoglobulin fold	Nucleoplasm(Enhanced)		(M288)PID HES HEY PATHWAY; (M276)PID FGF PATHWAY; (M279)PID RB 1PATHWAY		0		1	0	1	1	0	1	1	1	1	0	0	1	0	1	0	0	1	0	1
30062	RAX	0	1	RAX	retina and anterior neural fold homeobox	GO:0021854 hypothalamus development;GO:0021536 diencephalon development;GO:0021761 limbic system development	Transcription factors/Helix-turn-helix domains					0		0	0	0	1	1	0	0	0	0	1	0	1	0	0	0	0	0	0	1
7547	ZIC3	1	0	ZIC3	Zic family member 3	GO:0035545 determination of left/right asymmetry in nervous system;GO:0035469 determination of pancreatic left/right asymmetry;GO:0071910 determination of liver left/right asymmetry	Transcription factors/Zinc-coordinating DNA-binding domains	Nucleoplasm(Supported)				0		0	1	0	1	0	0	0	0	0	0	1	0	0	0	0	1	0	0	1
1385	CREB1	0	1	CREB1	cAMP responsive element binding protein 1	GO:0032916 positive regulation of transforming growth factor beta3 production;GO:1900273 positive regulation of long-term synaptic potentiation;GO:0060509 type I pneumocyte differentiation	Transcription factors/Basic domains	Nucleoplasm(Enhanced)	Adenosine monophosphate (Transcriptional activator activity, rna polymerase ii transcription factor binding);Naloxone (Transcriptional activator activity, rna polymerase ii transcription factor binding)	(M56)PID LPA4 PATHWAY; (M14775)ST G ALPHA S PATHWAY; (M199)PID P38 MK2 PATHWAY		1	GO:0006950,GO:0006950,GO:0006950,GO:0006950,GO:0006950,GO:0006950,GO:0006950,GO:0006950,GO:0006950,GO:0006950,GO:0006950,GO:0006950,GO:0006950	0	1	0	1	0	1	0	1	1	1	1	0	0	1	1	1	0	1	1
389058	SP5	0	1	SP5	Sp5 transcription factor	GO:0036342 post-anal tail morphogenesis;GO:0060349 bone morphogenesis;GO:0060348 bone development	Transcription factors/Zinc-coordinating DNA-binding domains	Nucleoli;Nucleus(Approved)		(M223)PID BETA CATENIN NUC PATHWAY		0		0	0	0	1	0	0	0	0	0	0	0	0	0	0	0	0	1	0	1
60529	ALX4	0	1	ALX4	ALX homeobox 4	GO:0035116 embryonic hindlimb morphogenesis;GO:0035115 embryonic forelimb morphogenesis;GO:0042733 embryonic digit morphogenesis	Transcription factors/Helix-turn-helix domains	Nucleoplasm(Supported)				0		0	0	0	1	0	0	0	0	0	0	0	1	0	1	0	1	0	0	1
3975	LHX1	0	1	LHX1	LIM homeobox 1	GO:0097379 dorsal spinal cord interneuron posterior axon guidance;GO:0090190 positive regulation of branching involved in ureteric bud morphogenesis;GO:0097378 dorsal spinal cord interneuron axon guidance	Transcription factors/Helix-turn-helix domains					0		1	0	0	1	1	0	1	0	0	1	0	0	0	1	0	1	1	0	1
83482	SCRT1	1	0	SCRT1	scratch family transcriptional repressor 1	GO:2001222 regulation of neuron migration;GO:0001764 neuron migration;GO:0000122 negative regulation of transcription by RNA polymerase II	Transcription factors/Zinc-coordinating DNA-binding domains	Nuclear bodies(Supported)				0		0	0	0	0	0	0	0	0	0	1	0	0	0	0	0	0	0	0	1
1998	ELF2	0	1	ELF2	E74 like ETS transcription factor 2	GO:0050855 regulation of B cell receptor signaling pathway;GO:0050854 regulation of antigen receptor-mediated signaling pathway;GO:0050853 B cell receptor signaling pathway	Transcription factors/Helix-turn-helix domains	Nuclear bodies;Nucleoplasm(Supported)		(M92)PID ANGIOPOIETIN RECEPTOR PATHWAY		0		0	0	0	0	0	0	0	0	0	0	0	0	0	0	0	0	0	0	1
6945	MLX	0	1	MLX	MAX dimerization protein MLX	GO:0000122 negative regulation of transcription by RNA polymerase II;GO:0045944 positive regulation of transcription by RNA polymerase II;GO:0045892 negative regulation of transcription, DNA-templated	Transcription factors/Basic domains	Cytosol;Nuclear membrane;Nucleoplasm(Supported)				0		0	0	0	0	0	0	0	0	0	0	0	0	0	0	1	0	0	0	1
4488	MSX2	0	1	MSX2	msh homeobox 2	GO:0051795 positive regulation of timing of catagen;GO:0051794 regulation of timing of catagen;GO:0048818 positive regulation of hair follicle maturation	Transcription factors/Helix-turn-helix domains	Nuclear speckles(Supported)				1	GO:0006950,GO:0006950,GO:0006950,GO:0006950,GO:0006950,GO:0006950,GO:0006950,GO:0006950,GO:0006950,GO:0006950,GO:0006950,GO:0006950,GO:0006950,GO:0006950,GO:0006950,GO:0006950,GO:0006950,GO:0006950,GO:0006950,GO:0006950	0	0	0	1	0	1	1	1	0	0	1	1	1	1	0	1	1	0	1
64864	RFX7	1	0	RFX7	regulatory factor X7	GO:0006357 regulation of transcription by RNA polymerase II;GO:0006366 transcription by RNA polymerase II;GO:0006355 regulation of transcription, DNA-templated	Transcription factors/Helix-turn-helix domains	Nuclear membrane;Nucleus(Approved)				0		0	0	0	0	0	0	0	0	0	0	0	0	0	0	0	0	0	0	1
127343	DMBX1	0	1	DMBX1	diencephalon/mesencephalon homeobox 1	GO:0008343 adult feeding behavior;GO:0008344 adult locomotory behavior;GO:0007631 feeding behavior	Transcription factors/Helix-turn-helix domains					0		0	0	0	0	0	0	0	0	0	0	0	0	0	0	0	1	0	1	1
7392	USF2	0	1	USF2	upstream transcription factor 2, c-fos interacting	GO:0000432 positive regulation of transcription from RNA polymerase II promoter by glucose;GO:0046016 positive regulation of transcription by glucose;GO:0000430 regulation of transcription from RNA polymerase II promoter by glucose	Transcription factors/Basic domains	Nucleoplasm(Enhanced)Vesicles(Approved)		(M65)PID FRA PATHWAY		0		0	0	0	0	0	0	0	0	0	0	0	0	0	1	0	0	0	0	1
5087	PBX1	0	1	PBX1	PBX homeobox 1	GO:0001658 branching involved in ureteric bud morphogenesis;GO:0060675 ureteric bud morphogenesis;GO:0072171 mesonephric tubule morphogenesis	Transcription factors/Helix-turn-helix domains	Nucleoplasm(Enhanced)		(M115)PID REG GR PATHWAY		0		0	1	1	1	0	0	1	1	0	0	1	1	0	0	0	0	0	0	1
3198	HOXA1	0	1	HOXA1	homeobox A1	GO:0021599 abducens nerve formation;GO:0060876 semicircular canal formation;GO:0021598 abducens nerve morphogenesis	Transcription factors/Helix-turn-helix domains					0		0	0	0	1	1	0	1	0	0	0	0	0	0	0	0	1	0	1	1
4613	MYCN	0	1	MYCN	MYCN proto-oncogene, bHLH transcription factor	GO:1903800 positive regulation of production of miRNAs involved in gene silencing by miRNA;GO:1903798 regulation of production of miRNAs involved in gene silencing by miRNA;GO:2000637 positive regulation of gene silencing by miRNA	Transcription factors/Basic domains	Nucleoli;Nucleus(Approved)			(M5953)HALLMARK KRAS SIGNALING UP	0		0	0	1	0	0	0	0	0	0	0	0	0	0	0	0	0	0	0	1
8609	KLF7	0	1	KLF7	Kruppel like factor 7	GO:0061179 negative regulation of insulin secretion involved in cellular response to glucose stimulus;GO:1904178 negative regulation of adipose tissue development;GO:0046676 negative regulation of insulin secretion	Transcription factors/Zinc-coordinating DNA-binding domains	Golgi apparatus(Approved)			(M5946)HALLMARK COAGULATION; (M5891)HALLMARK HYPOXIA	0		0	0	0	0	0	0	0	0	0	1	0	1	0	1	1	0	0	0	1
7545	ZIC1	0	1	ZIC1	Zic family member 1	GO:0042307 positive regulation of protein import into nucleus;GO:1904591 positive regulation of protein import;GO:0042306 regulation of protein import into nucleus	Transcription factors/Zinc-coordinating DNA-binding domains	Nucleoplasm(Supported)				0		1	0	0	1	1	0	1	0	0	1	0	0	0	0	0	0	0	1	1
7101	NR2E1	1	0	NR2E1	nuclear receptor subfamily 2 group E member 1	GO:0021819 layer formation in cerebral cortex;GO:0021960 anterior commissure morphogenesis;GO:0021801 cerebral cortex radial glia guided migration	Nuclear receptors;Transcription factors/Zinc-coordinating DNA-binding domains	Nuclear bodies(Approved)				1	GO:0033555,GO:0006950,GO:0033555,GO:0006950,GO:0033555,GO:0006950,GO:0033555,GO:0006950,GO:0033555,GO:0006950,GO:0033555,GO:0006950,GO:0033555,GO:0006950,GO:0033555,GO:0006950,GO:0033555,GO:0006950,GO:0033555,GO:0006950,GO:0033555,GO:0006950,GO:0033555,GO:0006950,GO:0033555,GO:0006950,GO:0033555,GO:0006950,GO:0033555,GO:0006950,GO:0033555,GO:0006950,GO:0033555,GO:0006950,GO:0033555,GO:0006950,GO:…	1	0	0	0	1	1	1	0	0	1	1	0	1	0	0	0	0	1	1
6473	SHOX	0	1	SHOX	short stature homeobox	GO:0045944 positive regulation of transcription by RNA polymerase II;GO:0001501 skeletal system development;GO:0045893 positive regulation of transcription, DNA-templated	Transcription factors/Helix-turn-helix domains	Nucleoplasm(Enhanced)Vesicles(Approved)				0		0	0	0	1	0	0	0	0	0	0	0	0	0	0	0	0	0	0	1
1874	E2F4	0	1	E2F4	E2F transcription factor 4	GO:0006977 DNA damage response, signal transduction by p53 class mediator resulting in cell cycle arrest;GO:0072431 signal transduction involved in mitotic G1 DNA damage checkpoint;GO:0031571 mitotic G1 DNA damage checkpoint	Transcription factors/Helix-turn-helix domains	Nucleoplasm(Supported)		(M3686)SA REG CASCADE OF CYCLIN EXPR; (M279)PID RB 1PATHWAY; (M40)PID E2F PATHWAY	(M5901)HALLMARK G2M CHECKPOINT	1	GO:0033554,GO:0006950,GO:0033554,GO:0006950,GO:0033554,GO:0006950,GO:0033554,GO:0006950,GO:0033554,GO:0006950,GO:0033554,GO:0006950,GO:0033554,GO:0006950,GO:0033554,GO:0006950,GO:0033554,GO:0006950,GO:0033554,GO:0006950,GO:0033554,GO:0006950,GO:0033554,GO:0006950,GO:0033554,GO:0006950,GO:0033554,GO:0006950,GO:0033554,GO:0006950,GO:0033554,GO:0006950,GO:0033554,GO:0006950,GO:0033554,GO:0006950,GO:…	0	0	0	0	0	0	0	1	0	0	1	0	0	1	0	1	0	0	1
4800	NFYA	0	1	NFYA	nuclear transcription factor Y subunit alpha	GO:0045540 regulation of cholesterol biosynthetic process;GO:0106118 regulation of sterol biosynthetic process;GO:0090181 regulation of cholesterol metabolic process	Transcription factors/Other all-alpha-helical DNA-binding domains	Nucleoplasm(Enhanced)		(M254)PID MYC REPRESS PATHWAY; (M145)PID P53 DOWNSTREAM PATHWAY	(M5922)HALLMARK UNFOLDED PROTEIN RESPONSE	0		0	0	0	0	0	0	0	0	0	0	0	0	0	0	1	0	0	0	1
26298	EHF	0	1	EHF	ETS homologous factor	GO:0045944 positive regulation of transcription by RNA polymerase II;GO:0050673 epithelial cell proliferation;GO:0030855 epithelial cell differentiation	Transcription factors/Helix-turn-helix domains	Nucleoplasm(Supported)Golgi apparatus(Approved)				0		0	0	0	0	0	0	0	0	0	0	0	0	0	0	0	0	0	0	1
51621	KLF13	0	1	KLF13	Kruppel like factor 13	GO:0045647 negative regulation of erythrocyte differentiation;GO:0045646 regulation of erythrocyte differentiation;GO:0045638 negative regulation of myeloid cell differentiation	Transcription factors/Zinc-coordinating DNA-binding domains					0		0	0	0	0	0	0	0	0	1	0	1	0	1	0	0	0	1	0	1
4286	MITF	0	1	MITF	melanocyte inducing transcription factor	GO:0044336 canonical Wnt signaling pathway involved in negative regulation of apoptotic process;GO:0045670 regulation of osteoclast differentiation;GO:0030318 melanocyte differentiation	Transcription factors/Basic domains			(M229)PID P38 ALPHA BETA DOWNSTREAM PATHWAY; (M183)PID IL6 7 PATHWAY; (M231)PID KIT PATHWAY		0		1	0	0	0	1	1	0	1	1	0	0	0	0	0	1	0	0	0	1
8092	ALX1	0	1	ALX1	ALX homeobox 1	GO:0001843 neural tube closure;GO:0010718 positive regulation of epithelial to mesenchymal transition;GO:0014020 primary neural tube formation	Transcription factors/Helix-turn-helix domains	Nuclear bodies;Nucleoplasm(Supported)Golgi apparatus(Uncertain)				0		0	0	0	1	0	0	1	0	0	0	0	1	0	0	0	0	0	0	1
6910	TBX5	1	0	TBX5	T-box 5	GO:0060980 cell migration involved in coronary vasculogenesis;GO:0072513 positive regulation of secondary heart field cardioblast proliferation;GO:0003218 cardiac left ventricle formation	Transcription factors/Immunoglobulin fold	Nucleoplasm(Approved)				0		0	0	0	1	0	0	1	0	0	0	1	0	1	0	0	1	0	0	1
4212	MEIS2	1	0	MEIS2	Meis homeobox 2	GO:0110024 positive regulation of cardiac muscle myoblast proliferation;GO:0110022 regulation of cardiac muscle myoblast proliferation;GO:2000288 positive regulation of myoblast proliferation	Transcription factors/Helix-turn-helix domains	Cytosol;Nucleoplasm(Approved)			(M5901)HALLMARK G2M CHECKPOINT	0		0	1	0	0	1	0	0	0	1	0	1	0	0	1	0	0	0	1	1
3280	HES1	0	1	HES1	hes family bHLH transcription factor 1	GO:0061106 negative regulation of stomach neuroendocrine cell differentiation;GO:2000227 negative regulation of pancreatic A cell differentiation;GO:0061105 regulation of stomach neuroendocrine cell differentiation	Transcription factors/Basic domains	Nucleus(Supported)		(M1)PID FANCONI PATHWAY; (M236)PID DELTA NP63 PATHWAY; (M288)PID HES HEY PATHWAY	(M5903)HALLMARK NOTCH SIGNALING; (M5890)HALLMARK TNFA SIGNALING VIA NFKB; (M5906)HALLMARK ESTROGEN RESPONSE EARLY	0		1	1	0	1	1	0	1	0	1	1	1	0	1	1	0	1	1	0	1
85416	ZIC5	1	0	ZIC5	Zic family member 5	GO:0007417 central nervous system development;GO:0006357 regulation of transcription by RNA polymerase II;GO:0006366 transcription by RNA polymerase II	Transcription factors/Zinc-coordinating DNA-binding domains	Nucleoplasm;Vesicles(Uncertain)				0		0	0	0	0	0	0	0	0	0	0	0	0	0	0	0	0	0	0	1
120237	DBX1	1	0	DBX1	developing brain homeobox 1	GO:0021521 ventral spinal cord interneuron specification;GO:0060579 ventral spinal cord interneuron fate commitment;GO:0021514 ventral spinal cord interneuron differentiation	Transcription factors/Helix-turn-helix domains					0		1	0	0	1	0	0	0	0	0	0	0	0	0	0	0	0	0	0	1
2063	NR2F6	1	0	NR2F6	nuclear receptor subfamily 2 group F member 6	GO:0050965 detection of temperature stimulus involved in sensory perception of pain;GO:0043153 entrainment of circadian clock by photoperiod;GO:0050961 detection of temperature stimulus involved in sensory perception	Nuclear receptors;Transcription factors/Zinc-coordinating DNA-binding domains					0		0	0	0	0	0	1	0	0	0	0	0	0	0	0	1	0	0	0	1
6886	TAL1	0	1	TAL1	TAL bHLH transcription factor 1, erythroid differentiation factor	GO:0030221 basophil differentiation;GO:0060375 regulation of mast cell differentiation;GO:0060217 hemangioblast cell differentiation	Transcription factors/Basic domains	Nucleus(Supported)			(M5945)HALLMARK HEME METABOLISM	0		1	0	0	1	0	0	1	0	1	1	1	0	0	0	0	0	1	1	1
30012	TLX3	0	1	TLX3	T cell leukemia homeobox 3	GO:0002087 regulation of respiratory gaseous exchange by neurological system process;GO:0044065 regulation of respiratory system process;GO:0048665 neuron fate specification	Transcription factors/Helix-turn-helix domains	Nucleoplasm(Supported)				0		1	0	1	0	0	0	0	0	0	1	1	0	0	0	0	0	0	0	1
170302	ARX	0	1	ARX	aristaless related homeobox	GO:0021831 embryonic olfactory bulb interneuron precursor migration;GO:0021853 cerebral cortex GABAergic interneuron migration;GO:0021830 interneuron migration from the subpallium to the cortex	Transcription factors/Helix-turn-helix domains					0		1	0	0	0	0	0	0	0	0	1	0	0	0	1	0	1	0	0	1
84504	NKX6-2	1	0	NKX6-2	NK6 homeobox 2	GO:0021913 regulation of transcription from RNA polymerase II promoter involved in ventral spinal cord interneuron specification;GO:0021912 regulation of transcription from RNA polymerase II promoter involved in spinal cord motor neuron fate specification;GO:0021521 ventral spinal cord interneuron specification	Transcription factors/Helix-turn-helix domains					0		1	1	0	1	0	0	0	0	0	0	1	0	0	0	0	0	0	0	1
7027	TFDP1	0	1	TFDP1	transcription factor Dp-1	GO:1900740 positive regulation of protein insertion into mitochondrial membrane involved in apoptotic signaling pathway;GO:1900739 regulation of protein insertion into mitochondrial membrane involved in apoptotic signaling pathway;GO:1901030 positive regulation of mitochondrial outer membrane permeabilization involved in apoptotic signaling pathway	Transcription factors/Helix-turn-helix domains	Cytosol;Nucleoplasm(Supported)		(M279)PID RB 1PATHWAY; (M40)PID E2F PATHWAY; (M2)PID SMAD2 3NUCLEAR PATHWAY	(M5901)HALLMARK G2M CHECKPOINT; (M5926)HALLMARK MYC TARGETS V1	1	GO:0033554,GO:0006950,GO:0033554,GO:0006950,GO:0033554,GO:0006950,GO:0033554,GO:0006950,GO:0033554,GO:0006950,GO:0033554,GO:0006950,GO:0033554,GO:0006950,GO:0033554,GO:0006950,GO:0033554,GO:0006950,GO:0033554,GO:0006950,GO:0033554,GO:0006950,GO:0033554,GO:0006950,GO:0033554,GO:0006950,GO:0033554,GO:0006950,GO:0033554,GO:0006950,GO:0033554,GO:0006950,GO:0033554,GO:0006950,GO:0033554,GO:0006950,GO:…	0	0	0	0	0	0	0	1	0	0	1	0	1	1	0	0	0	0	1
6722	SRF	0	1	SRF	serum response factor	GO:0003257 positive regulation of transcription from RNA polymerase II promoter involved in myocardial precursor cell differentiation;GO:0046016 positive regulation of transcription by glucose;GO:0045059 positive thymic T cell selection	Transcription factors	Nucleus(Supported)		(M199)PID P38 MK2 PATHWAY; (M206)PID PDGFRA PATHWAY; (M30)PID HDAC CLASSII PATHWAY	(M5908)HALLMARK ANDROGEN RESPONSE	1	GO:0090398,GO:0043149,GO:0033554,GO:0006950,GO:0090398,GO:0043149,GO:0033554,GO:0006950,GO:0090398,GO:0043149,GO:0033554,GO:0006950,GO:0090398,GO:0043149,GO:0033554,GO:0006950,GO:0090398,GO:0043149,GO:0033554,GO:0006950,GO:0090398,GO:0043149,GO:0033554,GO:0006950,GO:0090398,GO:0043149,GO:0033554,GO:0006950,GO:0090398,GO:0043149,GO:0033554,GO:0006950,GO:0090398,GO:0043149,GO:0033554,GO:0006950,GO:…	0	1	0	1	1	1	1	0	1	1	1	1	1	0	0	1	1	1	1
51804	SIX4	1	0	SIX4	SIX homeobox 4	GO:0072107 positive regulation of ureteric bud formation;GO:0072095 regulation of branch elongation involved in ureteric bud branching;GO:0072106 regulation of ureteric bud formation	Transcription factors/Helix-turn-helix domains	Nucleoplasm(Approved)				0		0	0	1	1	1	0	1	0	0	0	1	0	0	0	0	1	0	0	1
4904	YBX1	1	0	YBX1	Y-box binding protein 1	GO:0070934 CRD-mediated mRNA stabilization;GO:0048255 mRNA stabilization;GO:1903608 protein localization to cytoplasmic stress granule	Transcription factors	Cytosol(Enhanced)Vesicles(Supported)		(M50)PID PTP1B PATHWAY		1	GO:1903608,GO:1903608,GO:1903608,GO:1903608,GO:1903608,GO:1903608,GO:1903608,GO:1903608,GO:1903608,GO:1903608,GO:1903608,GO:1903608,GO:1903608,GO:1903608,GO:1903608,GO:1903608,GO:1903608,GO:1903608,GO:1903608,GO:1903608,GO:1903608,GO:1903608,GO:1903608,GO:1903608,GO:1903608,GO:1903608,GO:1903608,GO:1903608,GO:1903608,GO:1903608,GO:1903608,GO:1903608,GO:1903608,GO:1903608,GO:1903608,GO:1903608,GO:…	0	0	0	0	0	0	1	0	0	0	1	0	0	0	0	1	0	0	1

## Sheet: Table S5
Table S5: list of all TF motifs found enriched in N. vectensis groups and are stress related.
GroupID	Category	Term	Description	LogP	Log(q-value)	InTerm_InList	Genes	Symbols
1_Summary	GO Biological Processes	GO:0045165	cell fate commitment	-11.3294	-8.35432	11/260	860,2303,3280,4286,6886,6899,7101,30012,84504,120237,170302,3975,7545	RUNX2,FOXC2,HES1,MITF,TAL1,TBX1,NR2E1,TLX3,NKX6-2,DBX1,ARX,LHX1,ZIC1
1_Member	GO Biological Processes	GO:0045165	cell fate commitment	-11.3294	-8.35432	11/260	860,2303,3280,4286,6886,6899,7101,30012,84504,120237,170302	RUNX2,FOXC2,HES1,MITF,TAL1,TBX1,NR2E1,TLX3,NKX6-2,DBX1,ARX
1_Member	GO Biological Processes	GO:0021510	spinal cord development	-5.61294	-3.46275	5/104	3975,6886,7545,84504,120237	LHX1,TAL1,ZIC1,NKX6-2,DBX1
1_Member	GO Biological Processes	GO:0021953	central nervous system neuron differentiation	-7.014	-4.56578	7/183	3280,3975,6886,7101,84504,120237,170302	HES1,LHX1,TAL1,NR2E1,NKX6-2,DBX1,ARX
2_Summary	GO Biological Processes	GO:0035270	endocrine system development	-9.7864	-6.93134	7/126	406,1385,3280,5087,6722,6899,84504,4212,7547	ARNTL,CREB1,HES1,PBX1,SRF,TBX1,NKX6-2,MEIS2,ZIC3
2_Member	GO Biological Processes	GO:0035270	endocrine system development	-9.7864	-6.93134	7/126	406,1385,3280,5087,6722,6899,84504	ARNTL,CREB1,HES1,PBX1,SRF,TBX1,NKX6-2
2_Member	GO Biological Processes	GO:0031016	pancreas development	-7.38488	-4.86676	5/78	406,3280,4212,7547,84504	ARNTL,HES1,MEIS2,ZIC3,NKX6-2
3_Summary	KEGG Pathway	hsa05202	Transcriptional misregulation in cancer	-7.06307	-4.59071	7/180	860,2115,3087,4613,5087,30012,51804	RUNX2,ETV1,HHEX,MYCN,PBX1,TLX3,SIX4
3_Member	KEGG Pathway	hsa05202	Transcriptional misregulation in cancer	-7.06307	-4.59071	7/180	860,2115,3087,4613,5087,30012,51804	RUNX2,ETV1,HHEX,MYCN,PBX1,TLX3,SIX4
4_Summary	GO Biological Processes	GO:0072164	mesonephric tubule development	-16.8702	-12.5527	5/99	2303,3280,3975,5087,51804,860,3198,4488,6899,8092,60529,1385,4824,6722,7547,7545,84504,3087,6910,30062,120237,6473,6886,389058	FOXC2,HES1,LHX1,PBX1,SIX4,RUNX2,HOXA1,MSX2,TBX1,ALX1,ALX4,CREB1,NKX3-1,SRF,ZIC3,ZIC1,NKX6-2,HHEX,TBX5,RAX,DBX1,SHOX,TAL1,SP5
4_Member	GO Biological Processes	GO:0072164	mesonephric tubule development	-6.86282	-4.45007	5/99	2303,3280,3975,5087,51804	FOXC2,HES1,LHX1,PBX1,SIX4
4_Member	GO Biological Processes	GO:0048705	skeletal system morphogenesis	-11.0466	-8.09089	9/238	860,2303,3198,3975,4488,6899,8092,51804,60529	RUNX2,FOXC2,HOXA1,LHX1,MSX2,TBX1,ALX1,SIX4,ALX4
4_Member	GO Biological Processes	GO:0048732	gland development	-8.70066	-5.99598	9/438	1385,3280,4488,4824,5087,6722,6899,7547,51804	CREB1,HES1,MSX2,NKX3-1,PBX1,SRF,TBX1,ZIC3,SIX4
4_Member	GO Biological Processes	GO:0048568	embryonic organ development	-14.8767	-11.2582	13/429	860,2303,3198,3280,3975,5087,6722,6899,7545,7547,8092,51804,60529	RUNX2,FOXC2,HOXA1,HES1,LHX1,PBX1,SRF,TBX1,ZIC1,ZIC3,ALX1,SIX4,ALX4
4_Member	GO Biological Processes	GO:0072006	nephron development	-6.06697	-3.81397	5/143	2303,3280,3975,5087,51804	FOXC2,HES1,LHX1,PBX1,SIX4
4_Member	GO Biological Processes	GO:0072073	kidney epithelium development	-6.11255	-3.85579	5/140	2303,3280,3975,5087,51804	FOXC2,HES1,LHX1,PBX1,SIX4
4_Member	GO Biological Processes	GO:0072009	nephron epithelium development	-6.65347	-4.28585	5/109	2303,3280,3975,5087,51804	FOXC2,HES1,LHX1,PBX1,SIX4
4_Member	GO Biological Processes	GO:0001823	mesonephros development	-6.77656	-4.3936	5/103	2303,3280,3975,5087,51804	FOXC2,HES1,LHX1,PBX1,SIX4
4_Member	GO Biological Processes	GO:0001656	metanephros development	-7.04677	-4.58057	5/91	2303,3280,3975,4824,51804	FOXC2,HES1,LHX1,NKX3-1,SIX4
4_Member	GO Biological Processes	GO:0072163	mesonephric epithelium development	-6.86282	-4.45007	5/99	2303,3280,3975,5087,51804	FOXC2,HES1,LHX1,PBX1,SIX4
4_Member	GO Biological Processes	GO:0060675	ureteric bud morphogenesis	-5.87945	-3.66921	4/66	3280,3975,5087,51804	HES1,LHX1,PBX1,SIX4
4_Member	GO Biological Processes	GO:0072078	nephron tubule morphogenesis	-5.65585	-3.49676	4/75	3280,3975,5087,51804	HES1,LHX1,PBX1,SIX4
4_Member	GO Biological Processes	GO:0072088	nephron epithelium morphogenesis	-5.60995	-3.46275	4/77	3280,3975,5087,51804	HES1,LHX1,PBX1,SIX4
4_Member	GO Biological Processes	GO:0061333	renal tubule morphogenesis	-5.56527	-3.42679	4/79	3280,3975,5087,51804	HES1,LHX1,PBX1,SIX4
4_Member	GO Biological Processes	GO:0072080	nephron tubule development	-5.28198	-3.20507	4/93	3280,3975,5087,51804	HES1,LHX1,PBX1,SIX4
4_Member	GO Biological Processes	GO:0061326	renal tubule development	-5.24516	-3.17321	4/95	3280,3975,5087,51804	HES1,LHX1,PBX1,SIX4
4_Member	GO Biological Processes	GO:0048598	embryonic morphogenesis	-14.6915	-11.1522	14/584	860,2303,3198,3280,3975,4488,5087,6722,6899,7545,7547,8092,51804,60529	RUNX2,FOXC2,HOXA1,HES1,LHX1,MSX2,PBX1,SRF,TBX1,ZIC1,ZIC3,ALX1,SIX4,ALX4
4_Member	GO Biological Processes	GO:0060993	kidney morphogenesis	-5.22705	-3.16001	4/96	3280,3975,5087,51804	HES1,LHX1,PBX1,SIX4
4_Member	GO Biological Processes	GO:0001657	ureteric bud development	-6.88495	-4.45959	5/98	2303,3280,3975,5087,51804	FOXC2,HES1,LHX1,PBX1,SIX4
4_Member	GO Biological Processes	GO:0072171	mesonephric tubule morphogenesis	-5.85309	-3.64623	4/67	3280,3975,5087,51804	HES1,LHX1,PBX1,SIX4
4_Member	GO Biological Processes	GO:0048562	embryonic organ morphogenesis	-15.3658	-11.5255	12/286	860,2303,3198,3280,3975,6722,6899,7545,7547,8092,51804,60529	RUNX2,FOXC2,HOXA1,HES1,LHX1,SRF,TBX1,ZIC1,ZIC3,ALX1,SIX4,ALX4
4_Member	GO Biological Processes	GO:0009792	embryo development ending in birth or egg hatching	-11.3962	-8.3798	12/618	860,2303,3198,3280,3975,4824,5087,6722,6899,8092,51804,60529	RUNX2,FOXC2,HOXA1,HES1,LHX1,NKX3-1,PBX1,SRF,TBX1,ALX1,SIX4,ALX4
4_Member	GO Biological Processes	GO:0048706	embryonic skeletal system development	-13.5547	-10.2786	9/126	860,2303,3198,3975,5087,6899,8092,51804,60529	RUNX2,FOXC2,HOXA1,LHX1,PBX1,TBX1,ALX1,SIX4,ALX4
4_Member	GO Biological Processes	GO:0002009	morphogenesis of an epithelium	-9.25474	-6.48135	10/538	2303,3280,3975,4488,4824,5087,6722,7547,8092,51804	FOXC2,HES1,LHX1,MSX2,NKX3-1,PBX1,SRF,ZIC3,ALX1,SIX4
4_Member	GO Biological Processes	GO:0007507	heart development	-6.36787	-4.05474	8/588	1385,2303,3280,4488,4824,6722,6899,7547	CREB1,FOXC2,HES1,MSX2,NKX3-1,SRF,TBX1,ZIC3
4_Member	GO Biological Processes	GO:0048701	embryonic cranial skeleton morphogenesis	-10.7706	-7.86809	6/45	860,2303,3198,3975,6899,51804	RUNX2,FOXC2,HOXA1,LHX1,TBX1,SIX4
4_Member	GO Biological Processes	GO:0003007	heart morphogenesis	-6.16375	-3.89937	6/259	2303,3280,4488,6722,6899,7547	FOXC2,HES1,MSX2,SRF,TBX1,ZIC3
4_Member	GO Biological Processes	GO:0001763	morphogenesis of a branching structure	-8.42668	-5.77198	7/197	2303,3975,4488,4824,5087,6722,51804	FOXC2,LHX1,MSX2,NKX3-1,PBX1,SRF,SIX4
4_Member	GO Biological Processes	GO:0061138	morphogenesis of a branching epithelium	-8.64932	-5.95511	7/183	2303,3975,4488,4824,5087,6722,51804	FOXC2,LHX1,MSX2,NKX3-1,PBX1,SRF,SIX4
4_Member	GO Biological Processes	GO:0003002	regionalization	-14.3288	-10.8565	12/349	2303,3280,3975,4488,4824,5087,6722,6899,7547,8092,60529,84504	FOXC2,HES1,LHX1,MSX2,NKX3-1,PBX1,SRF,TBX1,ZIC3,ALX1,ALX4,NKX6-2
4_Member	GO Biological Processes	GO:0048754	branching morphogenesis of an epithelial tube	-9.23286	-6.4717	7/151	2303,3975,4488,4824,5087,6722,51804	FOXC2,LHX1,MSX2,NKX3-1,PBX1,SRF,SIX4
4_Member	GO Biological Processes	GO:1904888	cranial skeletal system development	-11.7997	-8.68638	7/66	860,2303,3198,3975,4488,6899,51804	RUNX2,FOXC2,HOXA1,LHX1,MSX2,TBX1,SIX4
4_Member	GO Biological Processes	GO:0001822	kidney development	-5.96649	-3.73894	6/280	2303,3280,3975,4824,5087,51804	FOXC2,HES1,LHX1,NKX3-1,PBX1,SIX4
4_Member	GO Biological Processes	GO:0072001	renal system development	-5.83489	-3.6347	6/295	2303,3280,3975,4824,5087,51804	FOXC2,HES1,LHX1,NKX3-1,PBX1,SIX4
4_Member	GO Biological Processes	GO:0001655	urogenital system development	-5.53827	-3.40716	6/332	2303,3280,3975,4824,5087,51804	FOXC2,HES1,LHX1,NKX3-1,PBX1,SIX4
4_Member	GO Biological Processes	GO:0007389	pattern specification process	-16.8702	-12.5527	17/445	2303,3087,3280,3975,4488,4824,5087,6722,6899,6910,7545,7547,8092,30062,60529,84504,120237	FOXC2,HHEX,HES1,LHX1,MSX2,NKX3-1,PBX1,SRF,TBX1,TBX5,ZIC1,ZIC3,ALX1,RAX,ALX4,NKX6-2,DBX1
4_Member	GO Biological Processes	GO:0060562	epithelial tube morphogenesis	-11.4372	-8.39845	10/322	2303,3280,3975,4488,4824,5087,6722,7547,8092,51804	FOXC2,HES1,LHX1,MSX2,NKX3-1,PBX1,SRF,ZIC3,ALX1,SIX4
4_Member	GO Biological Processes	GO:0048729	tissue morphogenesis	-9.60551	-6.77941	11/674	2303,3280,3975,4488,4824,5087,6722,6899,7547,8092,51804	FOXC2,HES1,LHX1,MSX2,NKX3-1,PBX1,SRF,TBX1,ZIC3,ALX1,SIX4
4_Member	GO Biological Processes	GO:0061053	somite development	-5.41764	-3.32549	4/86	2303,3975,4824,51804	FOXC2,LHX1,NKX3-1,SIX4
4_Member	GO Biological Processes	GO:0043009	chordate embryonic development	-11.5547	-8.49248	12/599	860,2303,3198,3280,3975,4824,5087,6722,6899,8092,51804,60529	RUNX2,FOXC2,HOXA1,HES1,LHX1,NKX3-1,PBX1,SRF,TBX1,ALX1,SIX4,ALX4
4_Member	GO Biological Processes	GO:0048704	embryonic skeletal system morphogenesis	-12.713	-9.50945	8/93	860,2303,3198,3975,6899,8092,51804,60529	RUNX2,FOXC2,HOXA1,LHX1,TBX1,ALX1,SIX4,ALX4
4_Member	GO Biological Processes	GO:2000027	regulation of animal organ morphogenesis	-6.2232	-3.94801	6/253	860,2303,3280,3975,6899,51804	RUNX2,FOXC2,HES1,LHX1,TBX1,SIX4
4_Member	GO Biological Processes	GO:0009952	anterior/posterior pattern specification	-14.9507	-11.2582	11/217	2303,3280,3975,4488,4824,5087,6722,6899,7547,8092,60529	FOXC2,HES1,LHX1,MSX2,NKX3-1,PBX1,SRF,TBX1,ZIC3,ALX1,ALX4
4_Member	GO Biological Processes	GO:0001501	skeletal system development	-11.7725	-8.68552	14/518	860,2303,3198,3975,4488,5087,6473,6722,6886,6899,8092,51804,60529,389058	RUNX2,FOXC2,HOXA1,LHX1,MSX2,PBX1,SHOX,SRF,TAL1,TBX1,ALX1,SIX4,ALX4,SP5
4_Member	GO Biological Processes	GO:0072028	nephron morphogenesis	-5.56527	-3.42679	4/79	3280,3975,5087,51804	HES1,LHX1,PBX1,SIX4
5_Summary	GO Biological Processes	GO:0048880	sensory system development	-12.0354	-8.89401	7/372	2303,3975,4212,4286,6722,7101,30062,3198,3280,6899,7545,51804	FOXC2,LHX1,MEIS2,MITF,SRF,NR2E1,RAX,HOXA1,HES1,TBX1,ZIC1,SIX4
5_Member	GO Biological Processes	GO:0048880	sensory system development	-6.53576	-4.20508	7/372	2303,3975,4212,4286,6722,7101,30062	FOXC2,LHX1,MEIS2,MITF,SRF,NR2E1,RAX
5_Member	GO Biological Processes	GO:0150063	visual system development	-6.57541	-4.22644	7/367	2303,3975,4212,4286,6722,7101,30062	FOXC2,LHX1,MEIS2,MITF,SRF,NR2E1,RAX
5_Member	GO Biological Processes	GO:0001654	eye development	-6.60755	-4.24913	7/363	2303,3975,4212,4286,6722,7101,30062	FOXC2,LHX1,MEIS2,MITF,SRF,NR2E1,RAX
5_Member	GO Biological Processes	GO:0007423	sensory organ development	-12.0354	-8.89401	12/545	2303,3198,3280,3975,4212,4286,6722,6899,7101,7545,30062,51804	FOXC2,HOXA1,HES1,LHX1,MEIS2,MITF,SRF,TBX1,NR2E1,ZIC1,RAX,SIX4
5_Member	GO Biological Processes	GO:0043010	camera-type eye development	-5.67796	-3.51279	6/314	2303,3975,4286,6722,7101,30062	FOXC2,LHX1,MITF,SRF,NR2E1,RAX
6_Summary	GO Biological Processes	GO:0071396	cellular response to lipid	-7.72361	-5.15434	8/611	406,1385,2063,4488,4824,6899,7101,7181,860,4286,6722,2303	ARNTL,CREB1,NR2F6,MSX2,NKX3-1,TBX1,NR2E1,NR2C1,RUNX2,MITF,SRF,FOXC2
6_Member	GO Biological Processes	GO:0071396	cellular response to lipid	-6.242	-3.95797	8/611	406,1385,2063,4488,4824,6899,7101,7181	ARNTL,CREB1,NR2F6,MSX2,NKX3-1,TBX1,NR2E1,NR2C1
6_Member	GO Biological Processes	GO:0006352	DNA-templated transcription, initiation	-7.72361	-5.15434	7/249	860,1385,2063,4286,6722,7101,7181	RUNX2,CREB1,NR2F6,MITF,SRF,NR2E1,NR2C1
6_Member	GO Biological Processes	GO:0030522	intracellular receptor signaling pathway	-4.64422	-2.69967	5/280	406,2063,4824,6899,7181	ARNTL,NR2F6,NKX3-1,TBX1,NR2C1
6_Member	GO Biological Processes	GO:0071407	cellular response to organic cyclic compound	-4.32729	-2.44758	6/543	406,2063,4488,4824,7101,7181	ARNTL,NR2F6,MSX2,NKX3-1,NR2E1,NR2C1
6_Member	GO Biological Processes	GO:0048545	response to steroid hormone	-3.97735	-2.13119	5/387	406,2063,4824,7101,7181	ARNTL,NR2F6,NKX3-1,NR2E1,NR2C1
6_Member	GO Biological Processes	GO:0032870	cellular response to hormone stimulus	-5.78039	-3.58351	8/704	406,1385,2063,2303,4488,4824,7101,7181	ARNTL,CREB1,NR2F6,FOXC2,MSX2,NKX3-1,NR2E1,NR2C1
6_Member	GO Biological Processes	GO:0071383	cellular response to steroid hormone stimulus	-4.87255	-2.86896	5/251	406,2063,4824,7101,7181	ARNTL,NR2F6,NKX3-1,NR2E1,NR2C1
6_Member	GO Biological Processes	GO:0009755	hormone-mediated signaling pathway	-5.01076	-2.97206	5/235	406,2063,4824,7101,7181	ARNTL,NR2F6,NKX3-1,NR2E1,NR2C1
6_Member	Reactome Gene Sets	R-HSA-383280	Nuclear Receptor transcription pathway	-4.43584	-2.53169	3/52	2063,7101,7181	NR2F6,NR2E1,NR2C1
6_Member	GO Biological Processes	GO:0006367	transcription initiation from RNA polymerase II promoter	-6.98188	-4.53948	6/188	860,1385,2063,6722,7101,7181	RUNX2,CREB1,NR2F6,SRF,NR2E1,NR2C1
6_Member	GO Biological Processes	GO:0043401	steroid hormone mediated signaling pathway	-5.52806	-3.40093	5/184	406,2063,4824,7101,7181	ARNTL,NR2F6,NKX3-1,NR2E1,NR2C1
7_Summary	GO Biological Processes	GO:0035904	aorta development	-8.62556	-5.94157	4/57	3280,4824,6722,6899,4488,6910,3198,51804,2303,3087,6886,7101,8092,860,4904,7545,3975,5087	HES1,NKX3-1,SRF,TBX1,MSX2,TBX5,HOXA1,SIX4,FOXC2,HHEX,TAL1,NR2E1,ALX1,RUNX2,YBX1,ZIC1,LHX1,PBX1
7_Member	GO Biological Processes	GO:0035904	aorta development	-6.13724	-3.87669	4/57	3280,4824,6722,6899	HES1,NKX3-1,SRF,TBX1
7_Member	GO Biological Processes	GO:0060411	cardiac septum morphogenesis	-4.70646	-2.73925	4/77	3280,4488,6899,6910	HES1,MSX2,TBX1,TBX5
7_Member	GO Biological Processes	GO:0021675	nerve development	-5.56527	-3.42679	4/79	3198,3280,6899,51804	HOXA1,HES1,TBX1,SIX4
7_Member	GO Biological Processes	GO:0048514	blood vessel morphogenesis	-4.97651	-2.95352	9/690	2303,3087,3198,3280,6722,6886,6899,6910,7101	FOXC2,HHEX,HOXA1,HES1,SRF,TAL1,TBX1,TBX5,NR2E1
7_Member	GO Biological Processes	GO:0060485	mesenchyme development	-5.96649	-3.73894	6/280	2303,3280,4488,6899,8092,51804	FOXC2,HES1,MSX2,TBX1,ALX1,SIX4
7_Member	GO Biological Processes	GO:0001568	blood vessel development	-5.48062	-3.37268	10/770	2303,3087,3198,3280,4824,6722,6886,6899,6910,7101	FOXC2,HHEX,HOXA1,HES1,NKX3-1,SRF,TAL1,TBX1,TBX5,NR2E1
7_Member	GO Biological Processes	GO:0048863	stem cell differentiation	-8.57038	-5.89637	9/258	860,2303,3280,4488,6722,6886,6899,6910,8092	RUNX2,FOXC2,HES1,MSX2,SRF,TAL1,TBX1,TBX5,ALX1
7_Member	GO Biological Processes	GO:0042692	muscle cell differentiation	-3.81591	-1.99261	6/392	3280,4904,6722,6899,6910,51804	HES1,YBX1,SRF,TBX1,TBX5,SIX4
7_Member	GO Biological Processes	GO:0003151	outflow tract morphogenesis	-5.52175	-3.40019	4/81	2303,3280,4488,6899	FOXC2,HES1,MSX2,TBX1
7_Member	GO Biological Processes	GO:0051146	striated muscle cell differentiation	-3.43661	-1.65697	5/297	4904,6722,6899,6910,51804	YBX1,SRF,TBX1,TBX5,SIX4
7_Member	GO Biological Processes	GO:0042471	ear morphogenesis	-4.88626	-2.87865	4/117	3198,6899,7545,51804	HOXA1,TBX1,ZIC1,SIX4
7_Member	GO Biological Processes	GO:0003279	cardiac septum development	-4.05282	-2.20075	4/113	3280,4488,6899,6910	HES1,MSX2,TBX1,TBX5
7_Member	GO Biological Processes	GO:0090596	sensory organ morphogenesis	-4.83945	-2.84005	5/255	3198,3975,6899,7545,51804	HOXA1,LHX1,TBX1,ZIC1,SIX4
7_Member	GO Biological Processes	GO:0042472	inner ear morphogenesis	-5.20913	-3.14695	4/97	3198,6899,7545,51804	HOXA1,TBX1,ZIC1,SIX4
7_Member	GO Biological Processes	GO:0014033	neural crest cell differentiation	-5.33878	-3.25685	4/90	2303,3280,6899,8092	FOXC2,HES1,TBX1,ALX1
7_Member	GO Biological Processes	GO:0048762	mesenchymal cell differentiation	-5.20618	-3.14641	6/221	2303,3280,4488,6899,6910,8092	FOXC2,HES1,MSX2,TBX1,TBX5,ALX1
7_Member	GO Biological Processes	GO:0048864	stem cell development	-5.43795	-3.33798	4/85	2303,3280,6899,8092	FOXC2,HES1,TBX1,ALX1
7_Member	GO Biological Processes	GO:0014031	mesenchymal cell development	-5.43795	-3.33798	4/85	2303,3280,6899,8092	FOXC2,HES1,TBX1,ALX1
7_Member	GO Biological Processes	GO:0048839	inner ear development	-5.48235	-3.37268	5/188	3198,3280,6899,7545,51804	HOXA1,HES1,TBX1,ZIC1,SIX4
7_Member	GO Biological Processes	GO:0003205	cardiac chamber development	-5.8494	-3.64588	6/171	2303,3280,4488,6722,6899,6910	FOXC2,HES1,MSX2,SRF,TBX1,TBX5
7_Member	GO Biological Processes	GO:0014032	neural crest cell development	-5.52175	-3.40019	4/81	2303,3280,6899,8092	FOXC2,HES1,TBX1,ALX1
7_Member	GO Biological Processes	GO:0021545	cranial nerve development	-6.33384	-4.03757	4/51	3198,3280,6899,51804	HOXA1,HES1,TBX1,SIX4
7_Member	GO Biological Processes	GO:0090102	cochlea development	-4.51376	-2.5939	3/49	3198,3280,6899	HOXA1,HES1,TBX1
7_Member	GO Biological Processes	GO:0003206	cardiac chamber morphogenesis	-6.5482	-4.21301	6/130	2303,3280,4488,6722,6899,6910	FOXC2,HES1,MSX2,SRF,TBX1,TBX5
7_Member	GO Biological Processes	GO:0035909	aorta morphogenesis	-4.99669	-2.96927	3/34	3280,6722,6899	HES1,SRF,TBX1
7_Member	GO Biological Processes	GO:0060840	artery development	-8.62556	-5.94157	6/100	2303,3198,3280,4824,6722,6899	FOXC2,HOXA1,HES1,NKX3-1,SRF,TBX1
7_Member	GO Biological Processes	GO:0048844	artery morphogenesis	-7.44206	-4.90275	5/76	2303,3198,3280,6722,6899	FOXC2,HOXA1,HES1,SRF,TBX1
7_Member	GO Biological Processes	GO:0048538	thymus development	-8.56043	-5.89619	5/46	3280,5087,6722,6899,51804	HES1,PBX1,SRF,TBX1,SIX4
7_Member	GO Biological Processes	GO:0043583	ear development	-5.19814	-3.14076	5/215	3198,3280,6899,7545,51804	HOXA1,HES1,TBX1,ZIC1,SIX4
8_Summary	Canonical Pathways	M279	PID RB 1PATHWAY	-5.90623	-3.6822	4/65	860,1874,4286,7027,1385,5087,4488	RUNX2,E2F4,MITF,TFDP1,CREB1,PBX1,MSX2
8_Member	Canonical Pathways	M279	PID RB 1PATHWAY	-5.90623	-3.6822	4/65	860,1874,4286,7027	RUNX2,E2F4,MITF,TFDP1
8_Member	Canonical Pathways	M2	PID SMAD2 3NUCLEAR PATHWAY	-5.5004	-3.38434	4/82	860,1385,1874,7027	RUNX2,CREB1,E2F4,TFDP1
8_Member	Reactome Gene Sets	R-HSA-157118	Signaling by NOTCH	-3.9842	-2.13657	3/235	1385,5087,7027	CREB1,PBX1,TFDP1
8_Member	GO Biological Processes	GO:0090068	positive regulation of cell cycle process	-5.35302	-3.26751	4/297	1874,4488,5087,7027	E2F4,MSX2,PBX1,TFDP1
9_Summary	GO Biological Processes	GO:2000142	regulation of DNA-templated transcription, initiation	-5.30501	-3.2256	3/37	1385,4286,6722,3280,4212,6886,51621,860,3087	CREB1,MITF,SRF,HES1,MEIS2,TAL1,KLF13,RUNX2,HHEX
9_Member	GO Biological Processes	GO:2000142	regulation of DNA-templated transcription, initiation	-4.88436	-2.87865	3/37	1385,4286,6722	CREB1,MITF,SRF
9_Member	GO Biological Processes	GO:2000144	positive regulation of DNA-templated transcription, initiation	-5.30501	-3.2256	3/27	1385,4286,6722	CREB1,MITF,SRF
9_Member	GO Biological Processes	GO:1903706	regulation of hemopoiesis	-3.35443	-1.58351	6/478	1385,3280,4212,4286,6886,51621	CREB1,HES1,MEIS2,MITF,TAL1,KLF13
9_Member	GO Biological Processes	GO:0031334	positive regulation of protein complex assembly	-2.64109	-0.919561	4/268	1385,4286,6722,6886	CREB1,MITF,SRF,TAL1
9_Member	GO Biological Processes	GO:0002761	regulation of myeloid leukocyte differentiation	-2.73551	-1.00912	3/117	1385,4286,6886	CREB1,MITF,TAL1
9_Member	GO Biological Processes	GO:1903707	negative regulation of hemopoiesis	-3.50397	-1.71543	4/157	3280,4212,6886,51621	HES1,MEIS2,TAL1,KLF13
9_Member	GO Biological Processes	GO:0002573	myeloid leukocyte differentiation	-2.05519	-0.376224	3/205	1385,4286,6886	CREB1,MITF,TAL1
9_Member	GO Biological Processes	GO:0002521	leukocyte differentiation	-3.17111	-1.41594	6/518	860,1385,3087,4286,6722,6886	RUNX2,CREB1,HHEX,MITF,SRF,TAL1
9_Member	GO Biological Processes	GO:0045637	regulation of myeloid cell differentiation	-3.76576	-1.95435	5/252	1385,4212,4286,6886,51621	CREB1,MEIS2,MITF,TAL1,KLF13
9_Member	GO Biological Processes	GO:0030099	myeloid cell differentiation	-3.66518	-1.86886	6/418	1385,4212,4286,6722,6886,51621	CREB1,MEIS2,MITF,SRF,TAL1,KLF13
10_Summary	GO Biological Processes	GO:0001764	neuron migration	-6.5901	-4.23643	5/156	3975,6722,30012,83482,170302,1385,8609,7101,3280,30062,2115,6899,7545,6886	LHX1,SRF,TLX3,SCRT1,ARX,CREB1,KLF7,NR2E1,HES1,RAX,ETV1,TBX1,ZIC1,TAL1
10_Member	GO Biological Processes	GO:0001764	neuron migration	-4.75327	-2.77079	5/156	3975,6722,30012,83482,170302	LHX1,SRF,TLX3,SCRT1,ARX
10_Member	GO Biological Processes	GO:0006935	chemotaxis	-2.10192	-0.41894	4/644	1385,3975,8609,170302	CREB1,LHX1,KLF7,ARX
10_Member	GO Biological Processes	GO:0007409	axonogenesis	-4.71482	-2.74372	6/463	1385,3975,6722,7101,8609,170302	CREB1,LHX1,SRF,NR2E1,KLF7,ARX
10_Member	GO Biological Processes	GO:0021537	telencephalon development	-4.84767	-2.84619	5/254	3280,3975,6722,7101,170302	HES1,LHX1,SRF,NR2E1,ARX
10_Member	GO Biological Processes	GO:0061564	axon development	-4.48389	-2.56783	6/509	1385,3975,6722,7101,8609,170302	CREB1,LHX1,SRF,NR2E1,KLF7,ARX
10_Member	GO Biological Processes	GO:0048858	cell projection morphogenesis	-3.85326	-2.02717	6/662	1385,3975,6722,7101,8609,170302	CREB1,LHX1,SRF,NR2E1,KLF7,ARX
10_Member	GO Biological Processes	GO:0120039	plasma membrane bounded cell projection morphogenesis	-3.86762	-2.0373	6/658	1385,3975,6722,7101,8609,170302	CREB1,LHX1,SRF,NR2E1,KLF7,ARX
10_Member	GO Biological Processes	GO:0030900	forebrain development	-6.47348	-4.15166	7/380	1385,3280,3975,6722,7101,30062,170302	CREB1,HES1,LHX1,SRF,NR2E1,RAX,ARX
10_Member	GO Biological Processes	GO:0032990	cell part morphogenesis	-3.78636	-1.96859	6/681	1385,3975,6722,7101,8609,170302	CREB1,LHX1,SRF,NR2E1,KLF7,ARX
10_Member	GO Biological Processes	GO:0007411	axon guidance	-2.60064	-0.885244	4/275	2115,3975,8609,170302	ETV1,LHX1,KLF7,ARX
10_Member	GO Biological Processes	GO:0097485	neuron projection guidance	-2.59496	-0.880644	4/276	2115,3975,8609,170302	ETV1,LHX1,KLF7,ARX
10_Member	GO Biological Processes	GO:0048812	neuron projection morphogenesis	-3.91864	-2.07975	6/644	1385,3975,6722,7101,8609,170302	CREB1,LHX1,SRF,NR2E1,KLF7,ARX
10_Member	GO Biological Processes	GO:0042330	taxis	-2.09727	-0.415293	4/646	1385,3975,8609,170302	CREB1,LHX1,KLF7,ARX
10_Member	GO Biological Processes	GO:0048667	cell morphogenesis involved in neuron differentiation	-5.26264	-3.18822	7/578	1385,3280,3975,6722,7101,8609,170302	CREB1,HES1,LHX1,SRF,NR2E1,KLF7,ARX
10_Member	GO Biological Processes	GO:0060322	head development	-6.5901	-4.23643	9/771	1385,3280,3975,6722,6899,7101,7545,30062,170302	CREB1,HES1,LHX1,SRF,TBX1,NR2E1,ZIC1,RAX,ARX
10_Member	GO Biological Processes	GO:0007420	brain development	-5.67195	-3.50983	8/728	1385,3280,3975,6722,7101,7545,30062,170302	CREB1,HES1,LHX1,SRF,NR2E1,ZIC1,RAX,ARX
10_Member	GO Biological Processes	GO:0000904	cell morphogenesis involved in differentiation	-4.73058	-2.75357	9/741	1385,2115,3280,3975,6722,6886,7101,8609,170302	CREB1,ETV1,HES1,LHX1,SRF,TAL1,NR2E1,KLF7,ARX
10_Member	GO Biological Processes	GO:0021536	diencephalon development	-5.67928	-3.51279	4/74	1385,3280,30062,170302	CREB1,HES1,RAX,ARX
11_Summary	GO Biological Processes	GO:0019827	stem cell population maintenance	-9.58139	-6.7792	5/158	3280,5087,6886,7101,7547,4212,4824,30012,1385,84504,1874,4488,7027,6722,406,4904,6899,6910,51621,51804,8328	HES1,PBX1,TAL1,NR2E1,ZIC3,MEIS2,NKX3-1,TLX3,CREB1,NKX6-2,E2F4,MSX2,TFDP1,SRF,ARNTL,YBX1,TBX1,TBX5,KLF13,SIX4,GFI1B
11_Member	GO Biological Processes	GO:0019827	stem cell population maintenance	-4.72659	-2.75353	5/158	3280,5087,6886,7101,7547	HES1,PBX1,TAL1,NR2E1,ZIC3
11_Member	GO Biological Processes	GO:0098727	maintenance of cell number	-4.70027	-2.735	5/160	3280,5087,6886,7101,7547	HES1,PBX1,TAL1,NR2E1,ZIC3
11_Member	GO Biological Processes	GO:0045931	positive regulation of mitotic cell cycle	-4.64868	-2.70043	5/164	3280,4212,4824,5087,6886	HES1,MEIS2,NKX3-1,PBX1,TAL1
11_Member	GO Biological Processes	GO:0045665	negative regulation of neuron differentiation	-2.93283	-1.18708	4/223	3280,5087,7101,30012	HES1,PBX1,NR2E1,TLX3
11_Member	GO Biological Processes	GO:0042063	gliogenesis	-3.47037	-1.68439	5/292	1385,3280,6886,7101,84504	CREB1,HES1,TAL1,NR2E1,NKX6-2
11_Member	GO Biological Processes	GO:0050768	negative regulation of neurogenesis	-3.46356	-1.68013	5/293	3280,5087,7101,30012,84504	HES1,PBX1,NR2E1,TLX3,NKX6-2
11_Member	GO Biological Processes	GO:0051961	negative regulation of nervous system development	-3.33267	-1.56544	5/313	3280,5087,7101,30012,84504	HES1,PBX1,NR2E1,TLX3,NKX6-2
11_Member	GO Biological Processes	GO:0045787	positive regulation of cell cycle	-7.74307	-5.15434	8/389	1874,3280,4212,4488,4824,5087,7027,7101	E2F4,HES1,MEIS2,MSX2,NKX3-1,PBX1,TFDP1,NR2E1
11_Member	GO Biological Processes	GO:0010721	negative regulation of cell development	-3.15857	-1.40459	5/342	3280,5087,7101,30012,84504	HES1,PBX1,NR2E1,TLX3,NKX6-2
11_Member	GO Biological Processes	GO:0045664	regulation of neuron differentiation	-2.07197	-0.392003	4/657	3280,5087,6722,7101	HES1,PBX1,SRF,NR2E1
11_Member	GO Biological Processes	GO:0045596	negative regulation of cell differentiation	-9.58139	-6.7792	14/758	406,3280,4212,4488,4904,5087,6886,6899,6910,7101,30012,51621,51804,84504	ARNTL,HES1,MEIS2,MSX2,YBX1,PBX1,TAL1,TBX1,TBX5,NR2E1,TLX3,KLF13,SIX4,NKX6-2
11_Member	GO Biological Processes	GO:0007346	regulation of mitotic cell cycle	-4.22734	-2.35859	8/662	1874,3280,4212,4824,5087,6886,7027,8328	E2F4,HES1,MEIS2,NKX3-1,PBX1,TAL1,TFDP1,GFI1B
12_Summary	GO Biological Processes	GO:0051216	cartilage development	-8.29914	-5.66292	3/209	4488,6722,8092,5087,60529,6899,860,2303,8609,30062	MSX2,SRF,ALX1,PBX1,ALX4,TBX1,RUNX2,FOXC2,KLF7,RAX
12_Member	GO Biological Processes	GO:0051216	cartilage development	-4.1352	-2.27562	3/209	4488,6722,8092	MSX2,SRF,ALX1
12_Member	GO Biological Processes	GO:0035113	embryonic appendage morphogenesis	-6.85371	-4.45007	4/125	4488,5087,8092,60529	MSX2,PBX1,ALX1,ALX4
12_Member	GO Biological Processes	GO:0035107	appendage morphogenesis	-6.559	-4.21926	4/148	4488,5087,8092,60529	MSX2,PBX1,ALX1,ALX4
12_Member	GO Biological Processes	GO:0035108	limb morphogenesis	-6.559	-4.21926	4/148	4488,5087,8092,60529	MSX2,PBX1,ALX1,ALX4
12_Member	GO Biological Processes	GO:0060021	roof of mouth development	-3.73845	-1.93687	3/89	6899,8092,60529	TBX1,ALX1,ALX4
12_Member	GO Biological Processes	GO:0061448	connective tissue development	-6.03047	-3.78489	6/273	860,2303,4488,6722,8092,8609	RUNX2,FOXC2,MSX2,SRF,ALX1,KLF7
12_Member	GO Biological Processes	GO:0048736	appendage development	-8.29914	-5.66292	5/178	4488,5087,8092,30062,60529	MSX2,PBX1,ALX1,RAX,ALX4
12_Member	GO Biological Processes	GO:0030326	embryonic limb morphogenesis	-6.85371	-4.45007	4/125	4488,5087,8092,60529	MSX2,PBX1,ALX1,ALX4
12_Member	GO Biological Processes	GO:0060173	limb development	-8.29914	-5.66292	5/178	4488,5087,8092,30062,60529	MSX2,PBX1,ALX1,RAX,ALX4
13_Summary	GO Biological Processes	GO:0008285	negative regulation of cell proliferation	-3.78464	-1.96824	8/767	3280,4488,4824,6722,6910,7027,7101,51621	HES1,MSX2,NKX3-1,SRF,TBX5,TFDP1,NR2E1,KLF13
13_Member	GO Biological Processes	GO:0008285	negative regulation of cell proliferation	-3.78464	-1.96824	8/767	3280,4488,4824,6722,6910,7027,7101,51621	HES1,MSX2,NKX3-1,SRF,TBX5,TFDP1,NR2E1,KLF13
14_Summary	GO Biological Processes	GO:0042303	molting cycle	-7.69528	-5.1337	3/111	406,4488,60529,1385,1874,2303,3280,3975,6899,8609,170302,7027,7392,860,4212	ARNTL,MSX2,ALX4,CREB1,E2F4,FOXC2,HES1,LHX1,TBX1,KLF7,ARX,TFDP1,USF2,RUNX2,MEIS2
14_Member	GO Biological Processes	GO:0042303	molting cycle	-3.4557	-1.6748	3/111	406,4488,60529	ARNTL,MSX2,ALX4
14_Member	GO Biological Processes	GO:0030855	epithelial cell differentiation	-7.69528	-5.1337	10/783	406,1385,1874,2303,3280,3975,4488,6899,8609,170302	ARNTL,CREB1,E2F4,FOXC2,HES1,LHX1,MSX2,TBX1,KLF7,ARX
14_Member	GO Biological Processes	GO:0030856	regulation of epithelial cell differentiation	-5.88033	-3.66921	5/156	406,3280,3975,4488,8609	ARNTL,HES1,LHX1,MSX2,KLF7
14_Member	GO Biological Processes	GO:0045598	regulation of fat cell differentiation	-4.67974	-2.72212	4/132	406,1385,3280,4488	ARNTL,CREB1,HES1,MSX2
14_Member	GO Biological Processes	GO:0045604	regulation of epidermal cell differentiation	-4.24887	-2.37701	3/60	3280,4488,8609	HES1,MSX2,KLF7
14_Member	GO Biological Processes	GO:0045682	regulation of epidermis development	-3.81285	-1.99094	3/84	3280,4488,8609	HES1,MSX2,KLF7
14_Member	GO Biological Processes	GO:0045444	fat cell differentiation	-3.77982	-1.96479	4/225	406,1385,3280,4488	ARNTL,CREB1,HES1,MSX2
14_Member	GO Biological Processes	GO:0008544	epidermis development	-3.61474	-1.81973	5/463	3280,4488,7027,8609,60529	HES1,MSX2,TFDP1,KLF7,ALX4
14_Member	GO Biological Processes	GO:0042633	hair cycle	-3.4557	-1.6748	3/111	406,4488,60529	ARNTL,MSX2,ALX4
14_Member	GO Biological Processes	GO:0030879	mammary gland development	-2.47985	-0.776232	3/144	1385,4488,7392	CREB1,MSX2,USF2
14_Member	GO Biological Processes	GO:0071363	cellular response to growth factor stimulus	-3.69811	-1.90048	6/707	860,1385,3280,3975,4488,6899	RUNX2,CREB1,HES1,LHX1,MSX2,TBX1
14_Member	GO Biological Processes	GO:0070848	response to growth factor	-4.57886	-2.64522	7/737	860,1385,3280,3975,4212,4488,6899	RUNX2,CREB1,HES1,LHX1,MEIS2,MSX2,TBX1
15_Summary	KEGG Pathway	hsa04916	Melanogenesis	-3.48408	-1.69682	3/101	1385,4286,148327,6945,406,4824,8609,2063,4800	CREB1,MITF,CREB3L4,MLX,ARNTL,NKX3-1,KLF7,NR2F6,NFYA
15_Member	KEGG Pathway	hsa04916	Melanogenesis	-2.91882	-1.17626	3/101	1385,4286,148327	CREB1,MITF,CREB3L4
15_Member	KEGG Pathway	hsa04931	Insulin resistance	-2.84668	-1.10981	3/107	1385,6945,148327	CREB1,MLX,CREB3L4
15_Member	KEGG Pathway	hsa04728	Dopaminergic synapse	-2.60529	-0.888807	3/130	406,1385,148327	ARNTL,CREB1,CREB3L4
15_Member	GO Biological Processes	GO:0046883	regulation of hormone secretion	-3.48408	-1.69682	4/269	406,1385,4824,8609	ARNTL,CREB1,NKX3-1,KLF7
15_Member	GO Biological Processes	GO:0048511	rhythmic process	-3.31064	-1.54706	4/299	406,1385,2063,4800	ARNTL,CREB1,NR2F6,NFYA
15_Member	GO Biological Processes	GO:0046879	hormone secretion	-3.22561	-1.46687	4/315	406,1385,4824,8609	ARNTL,CREB1,NKX3-1,KLF7
15_Member	GO Biological Processes	GO:0009914	hormone transport	-3.17481	-1.41845	4/325	406,1385,4824,8609	ARNTL,CREB1,NKX3-1,KLF7
16_Summary	GO Biological Processes	GO:0045927	positive regulation of growth	-6.95874	-4.52209	4/271	1385,6722,6910,170302,3198,406,2115,2303,6899,51804,60529,3280,7547,4904,4488,148327,1874,3975,127343	CREB1,SRF,TBX5,ARX,HOXA1,ARNTL,ETV1,FOXC2,TBX1,SIX4,ALX4,HES1,ZIC3,YBX1,MSX2,CREB3L4,E2F4,LHX1,DMBX1
16_Member	GO Biological Processes	GO:0045927	positive regulation of growth	-2.62361	-0.904944	4/271	1385,6722,6910,170302	CREB1,SRF,TBX5,ARX
16_Member	GO Biological Processes	GO:0050890	cognition	-3.70997	-1.9097	3/291	1385,3198,6722	CREB1,HOXA1,SRF
16_Member	GO Biological Processes	GO:0007568	aging	-2.14793	-0.462928	3/319	406,1385,6722	ARNTL,CREB1,SRF
16_Member	GO Biological Processes	GO:0007517	muscle organ development	-5.71687	-3.53929	8/412	406,1385,2115,2303,6899,6910,51804,60529	ARNTL,CREB1,ETV1,FOXC2,TBX1,TBX5,SIX4,ALX4
16_Member	GO Biological Processes	GO:0014706	striated muscle tissue development	-5.11838	-3.07044	6/393	406,1385,2303,6722,6899,51804	ARNTL,CREB1,FOXC2,SRF,TBX1,SIX4
16_Member	GO Biological Processes	GO:0060541	respiratory system development	-5.4931	-3.37976	6/197	1385,3280,6722,6910,7547,51804	CREB1,HES1,SRF,TBX5,ZIC3,SIX4
16_Member	GO Biological Processes	GO:0060537	muscle tissue development	-5.00766	-2.97124	6/411	406,1385,2303,6722,6899,51804	ARNTL,CREB1,FOXC2,SRF,TBX1,SIX4
16_Member	GO Biological Processes	GO:0061061	muscle structure development	-6.95874	-4.52209	11/679	406,1385,2115,2303,3280,4904,6722,6899,6910,51804,60529	ARNTL,CREB1,ETV1,FOXC2,HES1,YBX1,SRF,TBX1,TBX5,SIX4,ALX4
16_Member	KEGG Pathway	hsa05166	HTLV-I infection	-3.87422	-2.04248	3/256	1385,4488,6722	CREB1,MSX2,SRF
16_Member	GO Biological Processes	GO:0048638	regulation of developmental growth	-4.21239	-2.34718	5/345	1385,2303,6722,51804,170302	CREB1,FOXC2,SRF,SIX4,ARX
16_Member	KEGG Pathway	hsa05203	Viral carcinogenesis	-2.07849	-0.397521	3/201	1385,6722,148327	CREB1,SRF,CREB3L4
16_Member	GO Biological Processes	GO:0030324	lung development	-4.56153	-2.63146	5/171	1385,3280,6722,6910,7547	CREB1,HES1,SRF,TBX5,ZIC3
16_Member	GO Biological Processes	GO:0008361	regulation of cell size	-4.35715	-2.46621	3/176	1385,1874,6722	CREB1,E2F4,SRF
16_Member	GO Biological Processes	GO:0048639	positive regulation of developmental growth	-3.24362	-1.48246	4/184	1385,6722,6910,170302	CREB1,SRF,TBX5,ARX
16_Member	GO Biological Processes	GO:0048589	developmental growth	-5.05798	-3.01468	9/674	1385,2303,3975,4488,6722,6910,51804,127343,170302	CREB1,FOXC2,LHX1,MSX2,SRF,TBX5,SIX4,DMBX1,ARX
16_Member	GO Biological Processes	GO:0045844	positive regulation of striated muscle tissue development	-4.47741	-2.56478	4/88	406,1385,6899,6910	ARNTL,CREB1,TBX1,TBX5
16_Member	GO Biological Processes	GO:0048636	positive regulation of muscle organ development	-4.47741	-2.56478	4/88	406,1385,6899,6910	ARNTL,CREB1,TBX1,TBX5
16_Member	GO Biological Processes	GO:1901863	positive regulation of muscle tissue development	-4.4581	-2.54979	4/89	406,1385,6899,6910	ARNTL,CREB1,TBX1,TBX5
16_Member	KEGG Pathway	hsa04022	cGMP-PKG signaling pathway	-2.32923	-0.637089	3/163	1385,6722,148327	CREB1,SRF,CREB3L4
16_Member	GO Biological Processes	GO:1901861	regulation of muscle tissue development	-4.73988	-2.76088	5/157	406,1385,6899,6910,51804	ARNTL,CREB1,TBX1,TBX5,SIX4
16_Member	GO Biological Processes	GO:0048634	regulation of muscle organ development	-4.72659	-2.75353	5/158	406,1385,6899,6910,51804	ARNTL,CREB1,TBX1,TBX5,SIX4
16_Member	GO Biological Processes	GO:0016202	regulation of striated muscle tissue development	-4.78031	-2.79123	5/154	406,1385,6899,6910,51804	ARNTL,CREB1,TBX1,TBX5,SIX4
16_Member	GO Biological Processes	GO:0030323	respiratory tube development	-4.51342	-2.5939	5/175	1385,3280,6722,6910,7547	CREB1,HES1,SRF,TBX5,ZIC3
17_Summary	GO Biological Processes	GO:0021700	developmental maturation	-5.07321	-3.02759	4/281	860,3280,4488,6886,2303,3975,6722,51621,389058,6899	RUNX2,HES1,MSX2,TAL1,FOXC2,LHX1,SRF,KLF13,SP5,TBX1
17_Member	GO Biological Processes	GO:0021700	developmental maturation	-2.56688	-0.855804	4/281	860,3280,4488,6886	RUNX2,HES1,MSX2,TAL1
17_Member	GO Biological Processes	GO:0007369	gastrulation	-3.24362	-1.48246	4/184	2303,3975,6722,6886	FOXC2,LHX1,SRF,TAL1
17_Member	GO Biological Processes	GO:0002244	hematopoietic progenitor cell differentiation	-2.30721	-0.61814	3/166	3280,6722,6886	HES1,SRF,TAL1
17_Member	GO Biological Processes	GO:0002262	myeloid cell homeostasis	-2.44641	-0.745958	3/148	6722,6886,51621	SRF,TAL1,KLF13
17_Member	GO Biological Processes	GO:0060348	bone development	-4.07917	-2.2256	5/216	860,4488,6722,6886,389058	RUNX2,MSX2,SRF,TAL1,SP5
17_Member	GO Biological Processes	GO:0001704	formation of primary germ layer	-3.95166	-2.10842	4/120	2303,3975,6722,6886	FOXC2,LHX1,SRF,TAL1
17_Member	GO Biological Processes	GO:0030218	erythrocyte differentiation	-2.75692	-1.02941	3/115	6722,6886,51621	SRF,TAL1,KLF13
17_Member	GO Biological Processes	GO:0007498	mesoderm development	-5.07321	-3.02759	5/134	2303,3975,6722,6886,6899	FOXC2,LHX1,SRF,TAL1,TBX1
17_Member	GO Biological Processes	GO:0034101	erythrocyte homeostasis	-2.67358	-0.9483	3/123	6722,6886,51621	SRF,TAL1,KLF13
18_Summary	GO Biological Processes	GO:0007626	locomotory behavior	-6.51161	-4.18537	3/196	6886,7545,127343,1385,2115,3198,4212,6722,6899,7101	TAL1,ZIC1,DMBX1,CREB1,ETV1,HOXA1,MEIS2,SRF,TBX1,NR2E1
18_Member	GO Biological Processes	GO:0007626	locomotory behavior	-2.10835	-0.42436	3/196	6886,7545,127343	TAL1,ZIC1,DMBX1
[truncated: 1 more rows]

## Sheet: Table S6
Table S6. ATAC-seq Primers sequenced used to label libraries.
[truncated: 26 more rows]
