# Supplementary material for: Chromatin Dynamics and Gene Expression Response to Heat Exposure in Field-Conditioned versus Laboratory-Cultured Nematostella vectensis
Source: MDPI journal article supplement (doi:10.3390/ijms22147454), 2021-07-12
Supplement: s1 [file s1]

Suplimentary figures:

**Table S1.** Number of peaks detected per sample using MACS2.

| Sample Name              | # of peaks in rep 1 | # of peaks in rep 2 | # of peaks in rep 1 |
|--------------------------|---------------------|---------------------|---------------------|
| Pre-stress 18 °C Lab     | 104756              | 133764              | 112986              |
| Pre-stress 18 °C Field   | 78973               | 68032               | 62041               |
| Stress 37 °C Lab         | 41212               | 76922               | 83081               |
| Stress 37 °C Field       | 55382               | 72263               | 115248              |
| 24h recovery 18 °C Lab   | 86776               | 84199               | 87249               |
| 24h recovery 18 °C Field | 118525              | 89064               | 100770              |
| 48h recovery 18 °C Lab   | 80117               | 100069              | 121582              |
| 48h recovery 18 °C Field | 78651               | 83962               | 73280               |

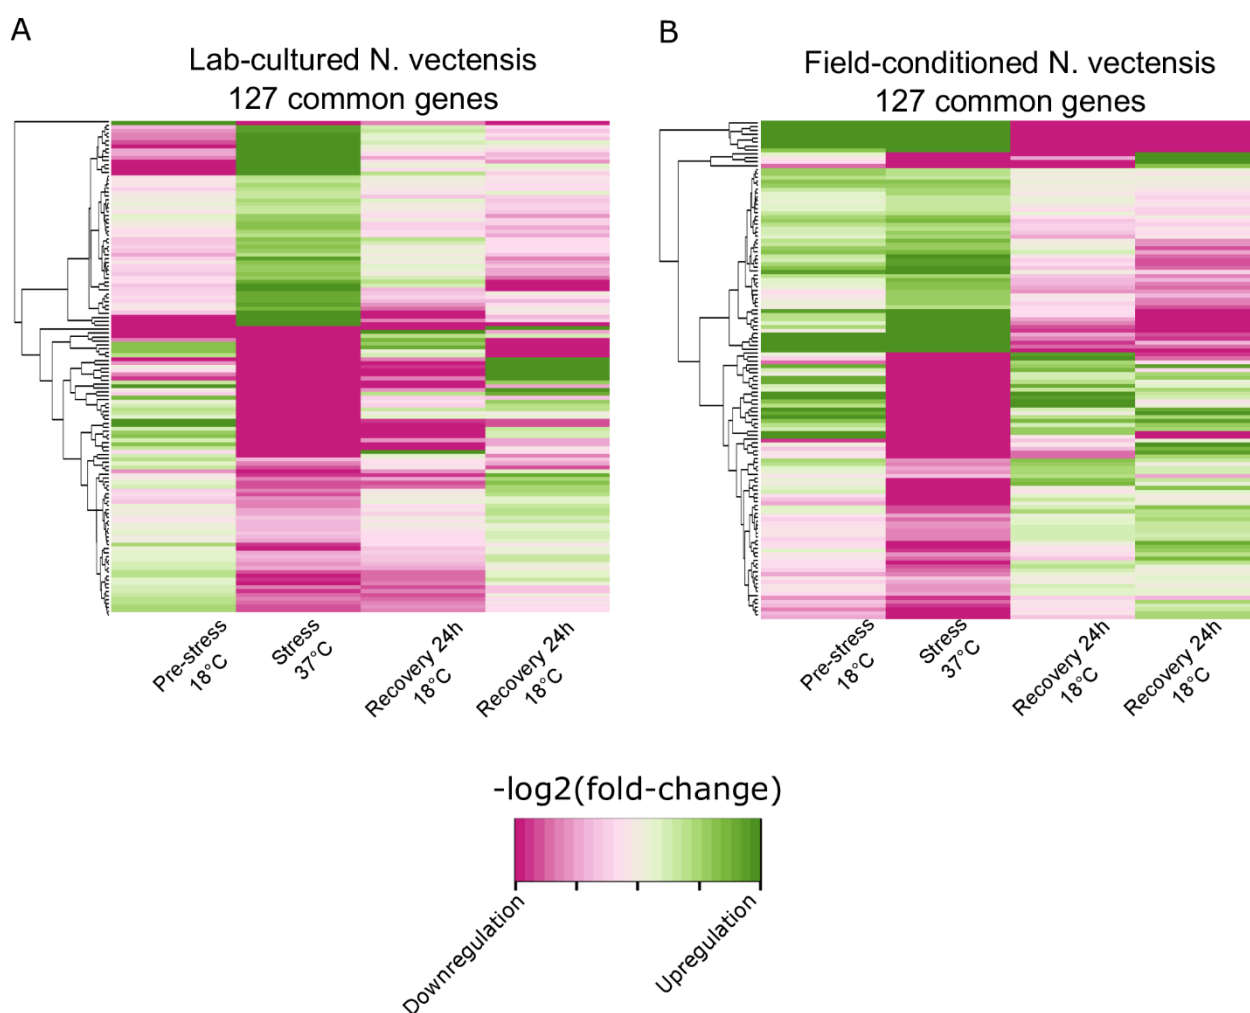

**Figure S1: Rearing conditions effect transcriptional response during heat exposure.** Heatmaps of  $-\log_2(\text{fold-change})$  of RNA expression of *N. vectensis* 127 overlapping genes from lab-cultured and field-conditioned groups.

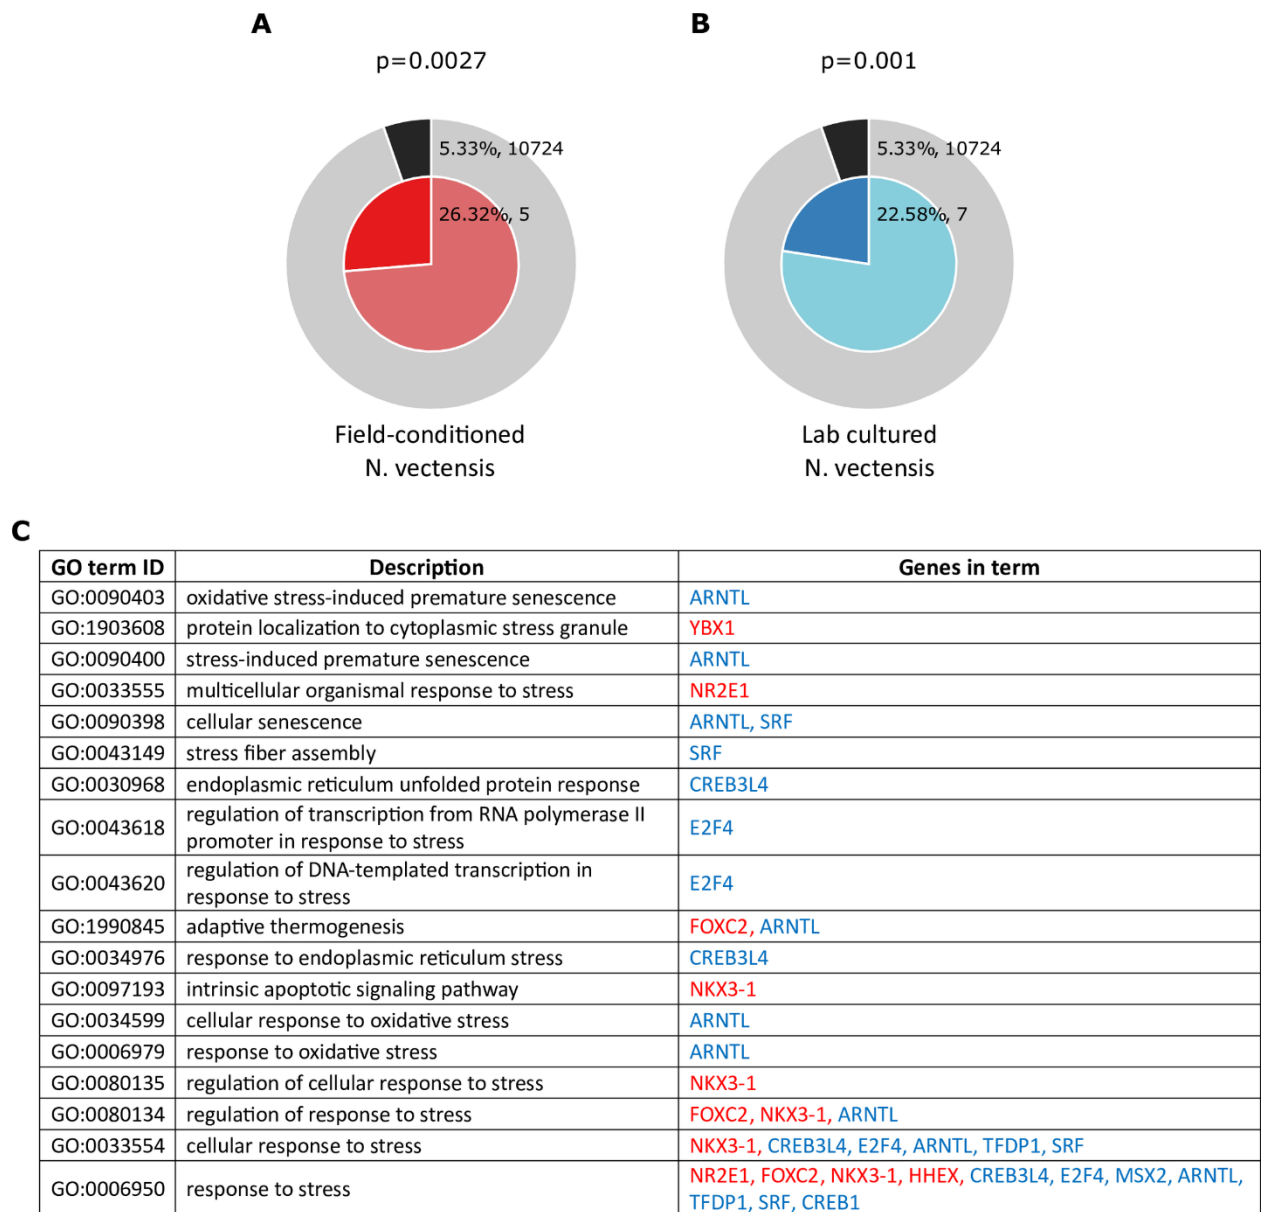

**Figure S2: Rearing conditions effect TF enrichment and transcriptional response during heat exposure.** (A and B) Enrichment of motifs for stress-responsive transcription factors in promoters of differentially expressed genes. The outer pie chart shows the number and the percentage of genes in the background (the total number of genes in all terms) that are associated with the stress related terms (in black); the inner pie chart shows the number and the percentage of genes in the individual input gene list (genes corresponding to TF motifs that are enriched in promoters of differentially expressed genes) that are associated with the stress related terms. The  $p$ -value indicates whether the stress membership is statistically significantly enriched in the list. GO term IDs, descriptions, and TF gene names are detailed in (C). Gene names in red are enriched in field-conditioned animals, and those in blue are enriched in lab-cultured animals.

Table S4: pathway enrichment statistics—Annotations (Excel file).

Table S5: pathway enrichment statistics—enrichment (Excel file)

**Table S6.** ATAC-seq primer sequences used to label libraries.

| Primer index      | Primer barcode  | Primer forward sequence                               |
|-------------------|-----------------|-------------------------------------------------------|
| Global for primer | Ad1 noMX:       | AATGATACGGCGACCACCGAGATCTACACTCGTCGGCAGCGTCAGATGTG    |
| A                 | Ad2.1_TAAGGCGA  | CAAGCAGAAGACGGCATACGAGATTCGCCTTAGTCTCGTGGGCTCGGAGATGT |
| B                 | Ad2.2_CGTACTAG  | CAAGCAGAAGACGGCATACGAGATCTAGTACGGTCTCGTGGGCTCGGAGATGT |
| C                 | Ad2.3_AGGCAGAA  | CAAGCAGAAGACGGCATACGAGATTTCTGCCTGTCTCGTGGGCTCGGAGATGT |
| D                 | Ad2.4_TCCTGAGC  | CAAGCAGAAGACGGCATACGAGATGCTCAGGAGTCTCGTGGGCTCGGAGATGT |
| E                 | Ad2.5_GGACTCCT  | CAAGCAGAAGACGGCATACGAGATAGGAGTCCGTCTCGTGGGCTCGGAGATGT |
| F                 | Ad2.6_TAGGCATG  | CAAGCAGAAGACGGCATACGAGATCATGCCTAGTCTCGTGGGCTCGGAGATGT |
| G                 | Ad2.7_CTCTCTAC  | CAAGCAGAAGACGGCATACGAGATGTAGAGAGGTCTCGTGGGCTCGGAGATGT |
| H                 | Ad2.8_CAGAGAGG  | CAAGCAGAAGACGGCATACGAGATCCTCTCTGGTCTCGTGGGCTCGGAGATGT |
| I                 | Ad2.9_GCTACGCT  | CAAGCAGAAGACGGCATACGAGATAGCGTAGCGTCTCGTGGGCTCGGAGATGT |
| J                 | Ad2.10_CGAGGCTG | CAAGCAGAAGACGGCATACGAGATCAGCCTCGGTCTCGTGGGCTCGGAGATGT |
| K                 | Ad2.11_AAGAGGCA | CAAGCAGAAGACGGCATACGAGATTGCCTCTTGTCTCGTGGGCTCGGAGATGT |
| L                 | Ad2.12_GTAGAGGA | CAAGCAGAAGACGGCATACGAGATTCCTCTACGTCTCGTGGGCTCGGAGATGT |
| M                 | Ad2.13_GTCGTGAT | CAAGCAGAAGACGGCATACGAGATATCACGACGTCTCGTGGGCTCGGAGATGT |
| N                 | Ad2.14_ACCACTGT | CAAGCAGAAGACGGCATACGAGATACAGTGGTGTCTCGTGGGCTCGGAGATGT |
| O                 | Ad2.15_TGGATCTG | CAAGCAGAAGACGGCATACGAGATCAGATCCAGTCTCGTGGGCTCGGAGATGT |
| P                 | Ad2.16_CCGTTTGT | CAAGCAGAAGACGGCATACGAGATACAAACGGGTCTCGTGGGCTCGGAGATGT |
| Q                 | Ad2.17_TGCTGGGT | CAAGCAGAAGACGGCATACGAGATACCCAGCAGTCTCGTGGGCTCGGAGATGT |
| R                 | Ad2.18_GAGGGGTT | CAAGCAGAAGACGGCATACGAGATAACCCCTCGTCTCGTGGGCTCGGAGATGT |
| S                 | Ad2.19_AGGTTGGG | CAAGCAGAAGACGGCATACGAGATCCCAACCTGTCTCGTGGGCTCGGAGATGT |
| T                 | Ad2.20_GTGTGGTG | CAAGCAGAAGACGGCATACGAGATCACCACACGTCTCGTGGGCTCGGAGATGT |
| U                 | Ad2.21_TGGGTTTC | CAAGCAGAAGACGGCATACGAGATGAAACCCAGTCTCGTGGGCTCGGAGATGT |
| V                 | Ad2.22_TGGTCACA | CAAGCAGAAGACGGCATACGAGATTGTGACCAGTCTCGTGGGCTCGGAGATGT |
| W                 | Ad2.23_TTGACCCT | CAAGCAGAAGACGGCATACGAGATAGGGTCAAGTCTCGTGGGCTCGGAGATGT |
| X                 | Ad2.24_CCACTCCT | CAAGCAGAAGACGGCATACGAGATAGGAGTGGGTCTCGTGGGCTCGGAGATGT |

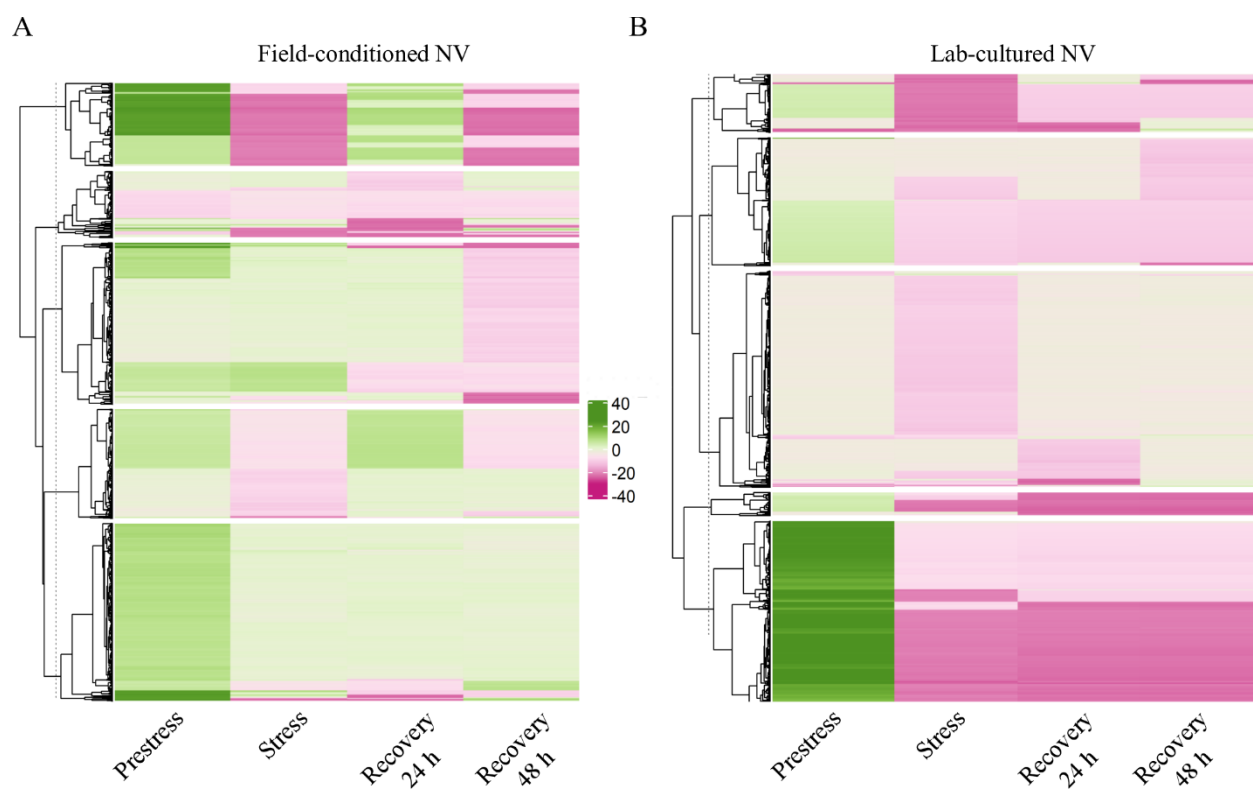

**Figure S3: Dynamic chromatin changes during heat exposure in field-conditions and lab-cultured *N. vectensis* promoters.** (A) 4462 differentially accessible promoters of field-conditioned *N. vectensis*. (B) 4633 differentially accessible promoters of lab-cultured *N. vectensis*.
